# Supplementary material for: High-throughput transcriptomics reveals the mechanisms of nanopesticides – nanoformulation, commercial formulation, active ingredient – finding safe and sustainable-by-design (SSbD) options for the environment
Source: Royal Society of Chemistry journal article supplement (doi:10.1039/d1en00735a), 2022-01-01
Supplement: d1en00735a2.xlsx [file d1en00735a2.xlsx]

## Sheet: Table S1
Table S1: List of all the differentially expressed genes in at least one condition (BH adjusted, p < 0.05) with the M value (log2 fold change) and adjusted p value for each treatment, and the Gene description based on GO annotation for each gene. EC20,50: reproduction effective concentration of 20% and 50%, d: days. Grey cells = ajdjusted p < 0.05
		nanoATZ_EC10_3d		nanoATZ_EC50_3d		ATZ_EC10_3d		ATZ_EC50_3d		Gesaprim_EC10_3d		Gesaprim_EC50_3d		nanoATZ_EC10_7d		nanoATZ_EC50_7d		ATZ_EC10_7d		ATZ_EC50_7d		Gesaprim_EC10_7d		Gesaprim_EC50_7d
Sequence ID	Gene description	M value	Adj p-value	M value	Adj p-value	M value	Adj p-value	M value	Adj p-value	M value	Adj p-value	M value	Adj p-value	M value	Adj p-value	M value	Adj p-value	M value	Adj p-value	M value	Adj p-value	M value	Adj p-value	M value	Adj p-value
contig00001	---NA---	0.53089	0.77587	0.09824	0.99558	0.82835	0.87068	2.3346	0.029198	0.49956	0.75849	-0.66309	0.59978	0.43573	0.99997	0.053717	0.99198	2.1861	0.0047791	1.5141	0.10058	1.12	0.51526	1.5564	0.16355
contig00011	---NA---	0.62078	0.15709	-0.069207	0.99454	0.14323	0.95582	0.10054	0.88759	0.38987	0.3931	-0.2174	0.66809	-0.034777	0.99997	0.31842	0.61426	0.61522	0.029513	0.53019	0.13822	0.43313	0.45453	0.90571	0.017627
contig00016	---NA---	0.43479	0.31487	-0.0029753	0.99948	0.091313	0.97076	0.3519	0.39249	0.50897	0.19001	0.18551	0.68898	0.0054797	0.99997	0.028855	0.98737	1.137	0.00019075	0.7261	0.023909	0.14451	0.84533	0.4152	0.23964
contig00020	---NA---	0.33944	0.5446	0.081066	0.9938	-0.068358	0.98444	-0.16434	0.79455	0.46171	0.30264	-0.45737	0.31997	-0.023641	0.99997	0.2662	0.70489	0.72659	0.01258	0.32536	0.43489	0.26093	0.71586	0.81976	0.032213
contig00029	---NA---	-0.13613	0.93112	-0.10666	0.99454	0.39544	0.92409	1.2208	0.040453	-0.24589	0.82846	-0.49804	0.51227	-0.56262	0.99997	0.13707	0.94622	1.0191	0.026299	0.5676	0.38159	0.57209	0.56448	0.53012	0.41951
contig00033	---NA---	0.52984	0.28045	0.25739	0.95538	-0.16027	0.95026	0.085856	0.91161	0.6316	0.16144	0.11609	0.85259	0.11221	0.99997	0.11571	0.92258	1.0221	0.0017247	0.48083	0.21918	0.18734	0.82064	0.31333	0.47327
contig00041	---NA---	0.28354	0.58512	0.07536	0.9938	0.22404	0.9018	0.60514	0.077934	0.55532	0.15434	-0.098667	0.85467	0.10845	0.99997	0.20359	0.76395	0.58299	0.02377	0.43618	0.18873	0.31881	0.56721	0.48134	0.16592
contig00046	---NA---	0.14338	0.93966	-0.49927	0.94095	-0.44173	0.90927	0.23173	0.8548	0.1082	0.9507	-0.36401	0.70583	-0.065987	0.99997	0.55223	0.65027	1.1489	0.030086	0.78911	0.26881	0.23271	0.88695	0.89859	0.21148
contig00050	PTCD3_XENTRRecName: Full=Pentatricopeptide repeat-containing protein 3, mitochondrial; Flags: Precursor	0.60554	0.32943	0.41615	0.88702	0.29392	0.92165	0.37727	0.56212	0.83804	0.13152	0.3735	0.54501	0.046847	0.99997	-0.0050025	0.99864	1.0027	0.0079452	0.37699	0.49367	-0.21166	0.83803	-0.0014211	0.9984
contig00052	NEUL2_HUMANRecName: Full=Neuralized-like protein 2	0.82793	0.18962	0.25929	0.98051	0.42304	0.8455	0.6592	0.26619	1.3244	0.021835	0.46768	0.4759	0.061518	0.99997	-0.12932	0.93992	1.1626	0.0052364	0.54191	0.3252	0.4584	0.60804	0.49622	0.38299
contig00066	---NA---	-0.55469	0.43125	-1.0781	0.10508	-0.84939	0.31362	-0.77677	0.15445	-0.34598	0.64886	-0.58947	0.34939	-0.85343	0.44993	-1.3199	0.015293	-0.36157	0.34368	-0.86666	0.074248	-1.4473	0.016283	-1.3305	0.011801
contig00073	---NA---	-0.14509	0.90857	-0.79341	0.45921	-0.54485	0.71834	-0.73146	0.19606	-0.10005	0.93575	-0.39651	0.54996	-0.84526	0.47183	-1.3538	0.01357	-0.14076	0.72592	-0.93449	0.055638	-1.5206	0.010056	-1.3176	0.013151
contig00074	---NA---	-0.050933	0.98138	-0.64724	0.85122	-0.65789	0.76804	-0.486	0.60434	-0.027631	0.98866	0.10136	0.93299	-0.74706	0.94732	-1.2204	0.15371	0.17655	0.73689	-0.78104	0.25607	-1.3954	0.13577	-1.3644	0.047516
contig00076	---NA---	-0.16317	0.89942	-0.89723	0.36125	-0.75826	0.46591	-0.59405	0.34755	-0.17758	0.8725	-0.25996	0.72957	-0.81999	0.5649	-1.2745	0.030051	-0.1217	0.77251	-0.87362	0.08551	-1.4782	0.0191	-1.3226	0.015792
contig00078	---NA---	0.73812	0.29403	0.49281	0.88173	0.19213	0.96266	0.067052	0.95402	1.2923	0.038351	0.82141	0.23054	0.11051	0.99997	0.028104	0.99198	0.29832	0.47674	0.03308	0.97493	-0.10223	0.94711	0.34106	0.60625
contig00108	---NA---	0.32917	0.67137	-0.17234	0.99245	0.12494	0.9707	0.21025	0.78212	0.71401	0.17807	0.1964	0.77143	-0.1903	0.99997	-0.33641	0.69145	1.1383	0.0024946	0.35628	0.49983	0.16567	0.87502	0.16774	0.78454
contig00111	---NA---	0.85018	0.15604	0.29846	0.96417	0.1856	0.95839	0.023166	0.98429	1.0542	0.066695	0.67653	0.28005	0.14194	0.99997	-0.28182	0.79313	1.1546	0.0043608	0.54833	0.29827	0.07916	0.95691	0.36779	0.52487
contig00135	---NA---	1.1394	0.15948	-0.047998	0.99719	0.30851	0.94592	0.61852	0.48069	0.8617	0.28512	0.027652	0.9831	-0.082728	0.99997	0.52068	0.67003	1.5217	0.0050953	0.98717	0.13315	0.27357	0.8561	0.97336	0.16774
contig00136	---NA---	0.69952	0.15506	0.24124	0.96863	0.76849	0.20474	1.2669	0.0014916	0.74799	0.1177	0.18628	0.75568	0.074574	0.99997	0.26996	0.73748	1.2525	0.00054631	1.0089	0.0117	0.46446	0.47926	0.65603	0.12312
contig00139	---NA---	0.40197	0.76776	-0.607	0.89692	0.6257	0.81699	1.1829	0.11507	0.029381	0.98866	-0.97551	0.27188	0.16142	0.99997	0.3566	0.82693	1.4051	0.011596	0.86828	0.22757	0.53141	0.68894	0.82729	0.27509
contig00145	---NA---	0.96988	0.1903	0.12368	0.99451	0.28684	0.94481	0.53939	0.50093	0.61599	0.4225	0.17335	0.86081	0.022027	0.99997	0.26891	0.86047	1.4396	0.0035649	0.58121	0.38165	0.26476	0.84331	0.69242	0.28592
contig00162	---NA---	0.70323	0.37006	0.50107	0.8986	1.0372	0.26465	1.4838	0.010339	0.72917	0.30518	0.27501	0.74574	0.27367	0.99997	0.50111	0.62627	0.96336	0.033839	1.11	0.049298	0.53476	0.59725	0.69082	0.27275
contig00164	---NA---	0.6551	0.38685	0.41196	0.94079	0.84639	0.41654	1.2849	0.021249	0.75582	0.25324	0.16215	0.85944	0.24957	0.99997	0.45984	0.6432	0.99804	0.022193	1.1892	0.027359	0.53527	0.57043	0.5913	0.32992
contig00176	---NA---	0.75599	0.39319	0.5125	0.92629	0.37356	0.93084	0.527	0.55528	0.72838	0.36791	0.25871	0.79468	-0.0085694	0.99997	0.30173	0.85198	0.50748	0.304	1.2605	0.044698	0.10659	0.95539	0.27212	0.75175
contig00193	---NA---	-1.3237	0.68377	-0.41053	0.9938	-1.3836	0.80994	0.21991	0.94467	0.13193	0.97349	0.71886	0.71776	-1.4506	0.9873	-3.1031	0.11397	1.5662	0.10242	-0.8969	0.54913	-4.329	0.028184	-3.7183	0.025336
contig00236	---NA---	0.48997	0.24788	0.072128	0.9938	0.25815	0.87465	0.032441	0.96394	0.59951	0.1259	0.32788	0.43795	-0.19955	0.99997	-0.24794	0.69166	0.5868	0.024155	0.26795	0.48995	-0.021287	0.98355	0.23456	0.54926
contig00273	---NA---	0.96529	0.1763	0.37675	0.9585	0.30928	0.93429	0.60979	0.40564	0.8878	0.1947	-0.085542	0.93621	0.47848	0.99997	0.38156	0.74438	1.568	0.0016488	1.2015	0.032673	0.68512	0.46671	1.0941	0.071821
contig00276	---NA---	0.96819	0.22103	0.55849	0.88498	0.44906	0.89224	0.56127	0.50395	0.75518	0.32973	-0.27178	0.77392	-0.11576	0.99997	0.86505	0.34955	1.6603	0.0018523	0.83989	0.18404	0.50749	0.65936	1.0771	0.098736
contig00292	---NA---	0.86948	0.069292	1.0198	0.039416	0.31349	0.87792	0.64606	0.14939	0.22258	0.7511	-0.57323	0.27188	0.64429	0.56593	1.0608	0.01819	0.39997	0.20262	0.77515	0.051769	0.34649	0.6415	0.34404	0.46228
contig00299	---NA---	0.73068	0.40728	0.49465	0.92842	0.70018	0.7025	0.72717	0.34755	1.0108	0.17854	0.82812	0.302	0.063039	0.99997	-0.43785	0.72624	0.99422	0.044883	0.51713	0.48862	0.52973	0.647	0.41122	0.59556
contig00316	---NA---	0.13385	0.97396	-0.060335	0.99792	-1.4576	0.60762	-0.6454	0.72657	0.44955	0.88408	0.77349	0.67223	1.1106	0.99997	0.69188	0.84085	2.7004	0.048904	1.0448	0.49513	0.44883	0.88587	-0.19306	0.9276
contig00321	---NA---	2.5511	0.071417	2.9571	0.046634	-0.067796	0.99645	-0.95448	0.57199	-0.08814	0.97722	1.1678	0.45149	1.5024	0.87196	1.468	0.42792	0.80825	0.38549	-0.60969	0.70764	0.79592	0.74391	0.78691	0.59266
contig00409	---NA---	0.62806	0.52052	0.013152	0.99864	0.25174	0.9575	0.38989	0.69508	0.81654	0.30357	0.93111	0.25944	-0.63429	0.99997	-0.86264	0.36875	1.3223	0.010712	0.4502	0.57166	-0.097637	0.95988	0.00049798	0.99975
contig00417	---NA---	0.6556	0.099243	0.38064	0.76394	0.68749	0.13571	0.8895	0.0075403	0.75778	0.052587	0.21793	0.63664	0.14172	0.99997	0.16418	0.83893	0.98743	0.00082758	0.57587	0.078246	0.52374	0.30563	0.83455	0.018168
contig00419	---NA---	0.54677	0.35932	0.0081341	0.99864	0.678	0.4176	0.97591	0.029873	0.98327	0.056415	0.61159	0.27854	-0.12901	0.99997	-0.61785	0.34739	1.4524	0.00032869	0.8454	0.050312	0.22726	0.81168	0.49263	0.31027
contig00442	MEGF6_HUMANRecName: Full=Multiple epidermal growth factor-like domains protein 6; Short=Multiple EGF-like domains protein 6; AltName: Full=Epidermal growth factor-like protein 3; Short=EGF-like protein 3; Flags: Precursor	1.0944	0.11754	0.31196	0.97898	0.094238	0.9886	-0.14813	0.8997	0.30091	0.77109	-0.28981	0.7342	0.033787	0.99997	0.73833	0.40516	1.1889	0.011174	0.592	0.35881	0.11471	0.94476	0.79969	0.20047
contig00446	---NA---	0.78102	0.62931	0.056345	0.99792	-0.3657	0.95906	-0.9519	0.45657	0.060709	0.9811	-0.66591	0.61664	0.071301	0.99997	1.2527	0.39498	1.6011	0.036553	0.18311	0.90997	0.28644	0.91044	1.2319	0.24199
contig00460	GST_PLAYORecName: Full=Glutathione S-transferase	0.5118	0.52642	0.36507	0.95193	0.40759	0.87792	0.84028	0.14948	0.31557	0.71581	-0.30974	0.68037	0.58269	0.95877	1.2977	0.030874	0.20441	0.62627	0.81704	0.11864	0.71783	0.38836	0.8005	0.15659
contig00489	TC3A_CAEELRecName: Full=Transposable element Tc3 transposase	0.26523	0.68569	-0.26784	0.94455	-0.018542	0.99683	0.12911	0.85318	0.28027	0.61049	-0.060078	0.92931	-0.2813	0.99997	-0.14078	0.89239	0.67709	0.021451	0.18283	0.71767	-0.26715	0.7144	-0.0469	0.93831
contig00508	PIGS_HUMANRecName: Full=GPI transamidase component PIG-S; AltName: Full=Phosphatidylinositol-glycan biosynthesis class S protein	0.65266	0.12978	0.075779	0.99383	0.034622	0.99446	0.10985	0.87328	0.51337	0.22957	-0.028011	0.96784	-0.031946	0.99997	0.0090695	0.99651	0.96014	0.0017605	0.51182	0.15267	0.17666	0.82042	0.46949	0.22015
contig00547	---NA---	0.44232	0.74465	-0.36567	0.98063	-0.43769	0.92409	-0.45831	0.67402	0.31878	0.8166	-0.70062	0.44855	-0.11127	0.99997	0.24943	0.90497	1.1915	0.034689	0.50832	0.56439	-0.2209	0.90349	0.60265	0.46514
contig00548	---NA---	0.02431	0.98957	-0.27596	0.97898	0.003375	0.99945	0.42067	0.55957	0.21296	0.8349	-0.49631	0.45789	0.33547	0.99997	0.75693	0.31786	1.0953	0.0087837	0.40254	0.51477	0.23072	0.84325	0.36476	0.55537
contig00569	POLR_DROMERecName: Full=Retrovirus-related Pol polyprotein from type-2 retrotransposable element R2DM; AltName: Full=Retrovirus-related Pol polyprotein from type II retrotransposable element R2DM; Includes: RecName: Full=Protease; Includes: RecName: Full=Reverse transcriptase; Includes: RecName: Full=Endonuclease	0.032306	0.98303	-0.5549	0.72492	0.28202	0.92409	0.4188	0.50016	0.14078	0.88985	0.091491	0.91232	-0.42336	0.99997	-0.63818	0.35307	0.77598	0.032384	0.44	0.39556	0.0089557	0.99431	0.40583	0.43977
contig00603	MARC2_MOUSERecName: Full=Mitochondrial amidoxime reducing component 2; Short=mARC2; AltName: Full=Molybdenum cofactor sulfurase C-terminal domain-containing protein 2; Short=MOSC domain-containing protein 2; Short=Moco sulfurase C-terminal domain-containing protein 2; Flags: Precursor	0.17128	0.93971	-0.26362	0.99367	0.92837	0.81591	0.60278	0.7045	0.40607	0.77649	-0.11905	0.95077	0.2786	0.99997	0.83582	0.52934	1.4951	0.022193	1.3483	0.095096	0.49436	0.79117	0.83751	0.35329
contig00605	NTCP_HUMANRecName: Full=Sodium/bile acid cotransporter; AltName: Full=Cell growth-inhibiting gene 29 protein; AltName: Full=Na(+)/bile acid cotransporter; AltName: Full=Na(+)/taurocholate transport protein; AltName: Full=Sodium/taurocholate cotransporting polypeptide; AltName: Full=Solute carrier family 10 member 1	2.9456	0.13984	2.5483	0.48646	1.3956	0.87913	1.5496	0.54038	2.8359	0.14893	1.6465	0.43493	0.90643	0.99997	3.1202	0.22184	3.4704	0.0089615	2.5636	0.11285	1.0065	0.79602	2.5247	0.19895
contig00619	---NA---	0.39396	0.50509	-0.069075	0.99454	-0.0073415	0.99857	-0.15964	0.82366	0.3438	0.52722	-0.31509	0.54501	-0.24752	0.99997	0.13143	0.91059	0.82473	0.0092509	0.49316	0.22616	7.2657e-05	0.99989	0.58747	0.16048
contig00621	---NA---	0.026452	0.99014	-0.59688	0.859	0.24304	0.95668	0.82032	0.24653	-0.11188	0.94372	-0.6537	0.40613	0.14614	0.99997	0.42198	0.72803	1.0096	0.036104	0.74306	0.24754	0.55204	0.61106	0.67803	0.31456
contig00635	---NA---	0.35631	0.82927	-0.21856	0.9938	-0.3262	0.94921	-0.23193	0.87494	0.43473	0.7346	-0.56439	0.58079	0.092532	0.99997	0.64664	0.63535	1.4967	0.01378	0.63726	0.47342	0.04256	0.98647	0.93157	0.26087
contig00636	---NA---	0.041147	0.98732	-0.425	0.97207	-0.19653	0.97384	0.10174	0.94827	0.27309	0.85929	-0.9939	0.29376	0.10896	0.99997	0.83273	0.47915	1.2072	0.038546	0.97691	0.19919	0.46052	0.76045	1.3244	0.089038
contig00637	---NA---	0.11526	0.92082	-0.30532	0.95105	0.17589	0.95571	0.6066	0.23169	0.811	0.1203	0.16475	0.81245	-0.017599	0.99997	0.077305	0.96576	0.94032	0.0082645	0.62968	0.15329	0.38761	0.62368	0.82929	0.073176
contig00639	---NA---	0.2707	0.87998	-0.46678	0.95998	-0.25972	0.96349	-0.46686	0.68603	0.4992	0.67148	-0.77366	0.42474	-0.11871	0.99997	0.60942	0.65708	1.425	0.017338	0.75069	0.36918	0.10141	0.96396	1.1025	0.17042
contig00650	---NA---	0.69188	0.14595	0.039352	0.9957	0.25476	0.91259	0.21191	0.73863	0.4394	0.37508	-0.57677	0.25025	0.029901	0.99997	0.43312	0.48551	0.42403	0.16066	0.65841	0.08731	0.56903	0.3509	1.0271	0.013775
contig00656	---NA---	0.69179	0.12924	0.25158	0.9585	0.17183	0.94687	0.17882	0.78169	0.52099	0.24968	-0.41516	0.38859	0.14204	0.99997	0.36962	0.55704	0.47766	0.10207	0.57035	0.12834	0.57639	0.31921	0.95575	0.017587
contig00659	HS12A_HUMANRecName: Full=Heat shock 70 kDa protein 12A	0.58257	0.51731	0.099341	0.99454	0.053734	0.99524	0.27747	0.78435	0.3598	0.70953	-0.43613	0.58448	-0.06501	0.99997	0.44559	0.69346	1.0312	0.027681	0.45065	0.52805	-0.33645	0.78837	0.27994	0.71773
contig00664	---NA---	1.0376	0.02486	0.70434	0.35403	-0.17904	0.94794	-0.46612	0.34335	0.44926	0.37792	0.0056229	0.99306	0.053766	0.99997	0.026078	0.99073	0.63686	0.043587	0.20954	0.69797	-0.23026	0.7855	-0.10148	0.86688
contig00667	---NA---	0.57272	0.29872	-0.11937	0.9938	0.18263	0.94886	0.39682	0.47691	0.075177	0.94491	-0.46971	0.38118	-0.058581	0.99997	0.207	0.83927	1.0221	0.0035284	0.56107	0.19131	-0.04222	0.97123	0.32374	0.51252
contig00671	---NA---	-0.17031	0.97236	-0.35043	0.9938	-3.3873	0.093479	-3.1861	0.031083	0.81591	0.7527	0.20086	0.94196	-0.19549	0.99997	0.50734	0.87683	0.66285	0.57407	0.92667	0.63159	0.50153	0.86717	0.36295	0.83551
contig00675	---NA---	0.53246	0.79716	0.52698	0.97898	0.46567	0.96765	0.090007	0.97972	0.046599	0.98708	2.0764	0.14338	0.97248	0.99997	0.71713	0.71226	2.313	0.040277	-0.47473	0.76092	0.16221	0.96108	0.10577	0.94859
contig00681	---NA---	0.62559	0.17235	0.3156	0.90952	0.26593	0.89336	0.59907	0.1416	0.55402	0.21099	-0.43508	0.35799	0.21958	0.99997	0.56502	0.29129	0.70889	0.016565	0.80839	0.026423	0.56238	0.32359	0.72243	0.064679
contig00687	---NA---	0.5166	0.59115	0.27959	0.98392	0.062048	0.99356	-0.069447	0.95768	0.13143	0.9292	0.013807	0.98997	0.30441	0.99997	0.01687	0.99639	1.0151	0.031974	0.60934	0.35908	0.52116	0.6314	0.52048	0.4481
contig00709	---NA---	0.91035	0.45925	0.27027	0.9938	-0.39995	0.94592	-0.052316	0.97924	0.38252	0.81313	-0.61355	0.59187	-0.19762	0.99997	0.47188	0.80431	1.3174	0.047397	1.0111	0.25971	-0.22794	0.91948	0.18149	0.88836
contig00720	---NA---	0.62965	0.24885	0.10488	0.9938	0.072018	0.98698	0.0074213	0.99402	0.62365	0.21695	0.026755	0.97437	-0.2699	0.99997	0.097985	0.9475	1.1689	0.0014634	0.58146	0.17521	0.018107	0.99	0.5708	0.20826
contig00737	---NA---	-0.27195	0.90576	0.10773	0.99556	-0.030206	0.99794	-0.35732	0.83261	-0.67195	0.62426	0.028911	0.98703	0.085511	0.99997	-0.13439	0.97363	-1.8912	0.01023	-1.4473	0.10846	-1.185	0.4087	-1.565	0.10361
contig00748	---NA---	0.83566	0.057276	0.73941	0.20249	0.073979	0.98313	0.062439	0.93789	0.16671	0.81648	-0.50659	0.28819	0.31747	0.99997	1.0751	0.0076418	0.88592	0.0042283	0.63272	0.085581	0.23846	0.75438	0.47332	0.24216
contig00755	---NA---	0.32789	0.71313	0.11696	0.9938	0.40408	0.85248	0.74138	0.17878	0.66336	0.26547	0.59443	0.34426	0.010154	0.99997	-0.37006	0.69262	1.0397	0.0089101	0.31696	0.61042	-0.075309	0.95976	0.02641	0.97653
contig00759	---NA---	0.22577	0.84278	-0.15434	0.9938	0.11279	0.98067	0.4336	0.54195	0.51293	0.44923	0.018191	0.98577	-0.11538	0.99997	0.1017	0.95927	1.1439	0.0064785	0.2806	0.67975	-0.094159	0.95051	0.61192	0.27626
contig00761	LEV9_CAEELRecName: Full=Protein lev-9; Flags: Precursor	-0.40543	0.91194	0.020509	0.9987	-0.81855	0.93493	-1.4537	0.48924	0.069054	0.98693	0.18859	0.94316	-0.57302	0.99997	-1.3275	0.70475	2.6547	0.034908	0.19865	0.9428	-0.61231	0.85164	-2.1819	0.15904
contig00765	---NA---	0.56345	0.51685	0.032355	0.99792	0.59892	0.74704	0.045894	0.97093	0.46137	0.57245	-0.58752	0.42719	-0.10979	0.99997	-0.028725	0.99296	1.2244	0.0085391	1.1154	0.047682	0.58795	0.60298	0.87436	0.20253
contig00797	---NA---	-0.023024	0.99135	-0.63832	0.79635	0.66188	0.69254	1.1677	0.05354	0.2057	0.86807	0.65405	0.37855	-0.17666	0.99997	-0.94844	0.24977	0.95504	0.037184	0.73949	0.22002	-0.028374	0.98871	-0.14484	0.86886
contig00801	---NA---	-0.1429	0.92155	-0.31464	0.97207	0.30696	0.93429	0.69298	0.28572	0.57714	0.41435	-0.1634	0.85811	0.57053	0.99377	0.45921	0.64369	0.30818	0.47175	0.71886	0.20313	1.1431	0.15185	1.3738	0.018507
contig00843	---NA---	0.21665	0.88628	-0.16539	0.9938	0.3585	0.93381	1.2878	0.046239	0.65675	0.4154	0.052454	0.9651	0.51997	0.99997	0.73778	0.44853	1.6232	0.0023299	0.82586	0.19882	0.6631	0.52243	1.0327	0.11883
contig00860	---NA---	0.27924	0.67846	-0.053428	0.99454	0.13774	0.96248	-0.1169	0.87494	0.41645	0.39338	0.116	0.85467	-0.302	0.99997	-0.21845	0.79554	0.6015	0.045076	0.068699	0.91404	0.014981	0.99035	0.23659	0.61739
contig00861	---NA---	0.23367	0.84597	-0.1353	0.9938	0.25618	0.9458	0.33816	0.68234	0.66033	0.32518	0.6339	0.35671	-0.28464	0.99997	-0.58127	0.50139	1.0632	0.01373	0.11998	0.89076	-0.031405	0.98587	0.27019	0.69648
contig00878	---NA---	0.13342	0.94848	-0.17914	0.9938	-0.17662	0.97545	0.81935	0.33955	0.24992	0.86706	-0.58513	0.52972	0.073168	0.99997	0.32455	0.85641	1.2362	0.026244	0.88242	0.22674	0.5641	0.66701	0.77889	0.31509
contig00882	TRIM2_HUMANRecName: Full=Tripartite motif-containing protein 2; AltName: Full=E3 ubiquitin-protein ligase TRIM2; AltName: Full=RING finger protein 86; AltName: Full=RING-type E3 ubiquitin transferase TRIM2	0.17257	0.90048	-0.38851	0.95082	-0.15863	0.97008	0.036736	0.97745	0.092619	0.94886	0.33423	0.66994	-0.23908	0.99997	-0.55163	0.54696	1.0485	0.017426	0.4001	0.55526	0.11557	0.9412	0.37464	0.57477
contig00883	---NA---	0.1391	0.95497	-0.33269	0.99367	-0.82743	0.82018	0.15237	0.92996	-0.2041	0.9278	-0.20004	0.8884	0.39763	0.99997	0.52522	0.82259	1.336	0.04054	1.1675	0.16158	0.65512	0.71798	0.67891	0.53285
contig00895	---NA---	0.44497	0.41885	-0.18044	0.98437	0.11305	0.96995	0.31417	0.56538	0.46848	0.33587	0.12235	0.84831	-0.19343	0.99997	-0.081526	0.95673	0.81923	0.0092484	0.27785	0.56234	0.17772	0.83782	0.34626	0.43607
contig00902	---NA---	0.78151	0.10596	0.18716	0.98456	0.23763	0.92935	0.3966	0.45526	0.66016	0.17266	-0.040554	0.95821	-0.1635	0.99997	0.1863	0.85653	0.87947	0.0074952	0.77265	0.051332	0.31058	0.68846	0.82889	0.053213
contig00922	---NA---	1.4625	0.16411	1.0662	0.70123	1.1785	0.52858	0.72709	0.53842	0.5327	0.69817	0.26558	0.8506	0.54752	0.99997	0.98543	0.46256	1.1765	0.077248	1.9893	0.018481	0.88847	0.5332	1.1575	0.20642
contig00923	---NA---	0.54772	0.19476	0.47077	0.60052	0.28635	0.84428	0.33899	0.43955	0.44023	0.28603	0.2262	0.62547	0.20064	0.99997	0.29814	0.61744	0.6255	0.019785	0.51452	0.12406	-0.16966	0.81852	0.10158	0.83416
contig00951	RL27_BOVINRecName: Full=60S ribosomal protein L27	0.36265	0.59333	-0.31476	0.94095	0.23811	0.93429	0.55242	0.26619	-0.010531	0.99443	-0.74614	0.16175	-0.12214	0.99997	0.35416	0.64431	0.60927	0.065777	0.93629	0.024752	0.36796	0.6314	0.93622	0.036303
contig00967	---NA---	-0.0054239	0.99887	0.071096	0.99719	0.63976	0.88939	1.3786	0.15799	0.034284	0.9918	0.96308	0.38901	0.70792	0.99997	0.68773	0.71079	1.8306	0.037763	0.8097	0.34653	1.488	0.26713	1.2335	0.19204
contig00969	---NA---	0.61326	0.48068	0.065111	0.99556	0.61728	0.74704	1.2803	0.033296	0.69294	0.3486	0.2268	0.80737	0.081667	0.99997	0.3548	0.77759	1.8081	0.00063455	0.99013	0.087995	0.37211	0.75713	0.64601	0.32117
contig00972	---NA---	0.37924	0.43779	0.25299	0.94095	0.42922	0.60549	0.72266	0.038868	0.18432	0.75582	-0.46735	0.28318	0.24987	0.99997	0.68582	0.11306	0.515	0.053874	0.76317	0.02342	0.61074	0.22927	0.95881	0.0086815
contig00973	---NA---	0.76418	0.055347	0.74844	0.095667	0.20804	0.92409	0.4069	0.31726	0.5867	0.14776	-0.42648	0.32003	0.63715	0.34614	0.99032	0.006164	0.78457	0.0049547	0.69467	0.035628	0.13536	0.86222	0.56443	0.11499
contig00975	---NA---	0.27339	0.8508	-0.10517	0.99454	0.58881	0.81368	1.3236	0.046716	0.40157	0.69817	0.059988	0.96106	0.15221	0.99997	0.38235	0.78361	1.9063	0.00083782	1.2074	0.055552	0.35731	0.79507	0.64089	0.37561
contig00985	AB22G_ARATHRecName: Full=ABC transporter G family member 22; Short=ABC transporter ABCG.22; Short=AtABCG22; AltName: Full=White-brown complex homolog protein 23; Short=AtWBC23	1.0978	0.28419	1.6234	0.15309	-1.785	0.07587	-1.7463	0.029524	0.40258	0.77324	0.30304	0.80688	-0.16056	0.99997	0.23871	0.92378	1.311	0.034497	0.20839	0.86659	-0.65797	0.64817	-0.47281	0.62965
contig01019	---NA---	0.46218	0.30927	-0.0080515	0.99864	0.28354	0.85136	0.50759	0.19204	0.6602	0.1084	0.20569	0.67343	-0.16265	0.99997	-0.17492	0.83035	1.1928	0.00020051	0.56303	0.096655	-0.0241	0.98214	0.20493	0.63333
contig01036	COG1_MOUSERecName: Full=Conserved oligomeric Golgi complex subunit 1; Short=COG complex subunit 1; AltName: Full=Component of oligomeric Golgi complex 1; AltName: Full=Low density lipoprotein receptor defect B-complementing protein	0.96486	0.51148	0.13979	0.99454	0.49272	0.96183	0.7333	0.73987	1.1502	0.55009	0.55799	0.72111	-0.14057	0.99997	-0.074202	0.99141	3.8667	0.0030229	1.1008	0.41326	0.9347	0.75011	0.91493	0.46167
contig01039	VDAC_DROMERecName: Full=Voltage-dependent anion-selective channel; AltName: Full=DmVDAC; AltName: Full=Porin	0.66892	0.45381	0.45349	0.94095	0.48281	0.87637	0.86566	0.22254	0.80499	0.28605	0.027912	0.98202	0.36309	0.99997	0.48236	0.67525	1.5586	0.0027273	0.67319	0.31368	-0.059517	0.97319	0.50417	0.48253
contig01040	RTXE_DROMERecName: Full=Probable RNA-directed DNA polymerase from transposon X-element; AltName: Full=Reverse transcriptase	1.0057	0.044367	1.1382	0.022484	0.59811	0.51592	0.76317	0.096016	0.8623	0.089501	-0.3693	0.51087	0.74567	0.44125	1.3276	0.0031358	1.0257	0.0039203	1.1104	0.0095164	0.5849	0.38387	0.97198	0.030986
contig01044	---NA---	0.46227	0.37104	0.030647	0.99719	0.2268	0.92539	0.10287	0.8914	0.54741	0.22882	0.32867	0.50876	-0.08992	0.99997	-0.16816	0.86578	0.8153	0.008066	0.19047	0.71111	-0.15458	0.85945	0.021106	0.97564
contig01045	---NA---	-0.10153	0.9425	-0.65645	0.6594	-0.5694	0.68687	-0.5562	0.36575	0.002307	0.99917	-0.91429	0.13756	-0.27199	0.99997	0.10143	0.95756	0.86273	0.027951	0.27427	0.67571	-0.14857	0.90804	0.60568	0.26403
contig01047	---NA---	0.64597	0.20871	0.12973	0.9938	0.46048	0.69267	0.67354	0.12852	0.42732	0.41334	0.12946	0.84687	-0.12768	0.99997	-0.13981	0.90664	1.0209	0.0028244	0.26965	0.59671	0.011842	0.99198	0.050094	0.93983
contig01068	---NA---	0.29066	0.81011	-0.33324	0.97048	0.15405	0.97325	0.78252	0.23827	0.44576	0.59441	-0.24551	0.7797	-0.0042551	0.99997	0.42135	0.70392	1.3484	0.0044408	0.75105	0.20256	0.35773	0.75928	0.71136	0.25324
contig01072	---NA---	1.3437	0.041573	0.87737	0.48191	1.5038	0.019453	2.3697	1.8715e-05	1.5743	0.011614	1.2694	0.062403	0.58447	0.99207	0.7285	0.39094	2.3767	1.368e-05	1.8166	0.0011933	1.0178	0.22321	1.2068	0.042169
contig01075	---NA---	0.56713	0.39252	-0.06261	0.99476	0.041433	0.99544	0.43262	0.50595	0.31601	0.67629	-0.53265	0.38564	-0.081169	0.99997	0.35759	0.6987	1.1773	0.0033737	0.70659	0.14151	0.13258	0.91781	0.78643	0.12201
contig01078	---NA---	0.43384	0.51589	-0.050477	0.99556	0.023392	0.99645	0.2703	0.68992	0.28428	0.68298	-0.406	0.47756	-0.1584	0.99997	0.23443	0.81681	1.0979	0.0030143	0.5657	0.2141	0.20923	0.82865	0.6936	0.13749
contig01080	---NA---	1.0699	0.10844	0.3399	0.96412	0.30426	0.93429	0.17916	0.86779	1.0523	0.11551	0.077319	0.94067	-0.14085	0.99997	-0.018847	0.99523	1.1283	0.011704	0.6119	0.30984	0.14565	0.92207	0.56163	0.36862
contig01091	PCKG_HAECORecName: Full=Phosphoenolpyruvate carboxykinase	0.5842	0.27864	-0.085615	0.99454	0.43774	0.74384	0.69283	0.12618	0.14016	0.87537	-0.25663	0.66149	-0.53234	0.85355	-0.86061	0.098068	0.80918	0.014936	0.48477	0.27428	0.098045	0.93134	0.38839	0.40722
contig01102	---NA---	0.32121	0.84958	0.59251	0.92823	0.78197	0.80633	0.65744	0.58052	-0.34863	0.80524	1.6949	0.06393	-0.3431	0.99997	0.4759	0.75918	1.893	0.0062687	0.72316	0.39286	-0.33624	0.84304	-0.091116	0.9408
contig01103	MIC60_MOUSERecName: Full=MICOS complex subunit Mic60; AltName: Full=Mitochondrial inner membrane protein; AltName: Full=Mitofilin; Flags: Precursor	0.76211	0.22775	0.669	0.63831	0.39136	0.89428	1.0335	0.077552	0.10339	0.93231	0.32493	0.63403	0.39385	0.99997	0.49696	0.60617	1.7541	0.00051838	1.142	0.020252	0.21971	0.86298	0.50366	0.42067
contig01104	---NA---	-0.46035	0.88587	-0.92811	0.95098	0.34096	0.98433	0.65628	0.83232	0.15328	0.96531	0.399	0.85602	0.74271	0.99997	0.28394	0.9546	4.0544	0.016565	0.54816	0.83972	0.98779	0.65287	0.44558	0.78567
contig01107	---NA---	0.29309	0.60945	0.14235	0.98979	0.58674	0.34582	1.1078	0.0015358	0.8328	0.043348	0.25133	0.59823	0.095547	0.99997	0.064961	0.96316	1.2591	0.00015357	0.79415	0.022426	0.085298	0.9295	0.30234	0.45499
contig01125	ABLM1_MOUSERecName: Full=Actin-binding LIM protein 1; Short=abLIM-1; AltName: Full=Actin-binding LIM protein family member 1	0.67732	0.58937	-0.27786	0.99373	-0.35825	0.94661	-0.35364	0.82514	-0.9657	0.32371	-0.28327	0.84418	0.2659	0.99997	1.3463	0.29044	1.5153	0.029557	0.78764	0.36647	0.53112	0.76643	0.77029	0.44179
contig01154	---NA---	0.10285	0.962	-0.7334	0.81493	0.89405	0.74384	0.70586	0.49844	-0.42668	0.74712	0.39399	0.68694	0.046407	0.99997	-0.96858	0.4157	4.0434	4.3522e-05	0.31061	0.74604	0.10646	0.95943	0.089322	0.93704
contig01158	---NA---	0.55018	0.44655	-0.16914	0.9938	0.33078	0.90843	0.30532	0.69258	0.18506	0.85892	0.31858	0.64934	0.12503	0.99997	0.22709	0.86055	1.1643	0.010107	0.34327	0.58143	0.63157	0.42869	1.0576	0.046431
contig01161	PD10A_DANRERecName: Full=Programmed cell death protein 10-A	0.48574	0.51341	-0.28222	0.97145	0.40089	0.85372	0.54896	0.36528	0.19796	0.83922	-0.41833	0.51596	0.033877	0.99997	-0.04756	0.98596	0.98945	0.01187	0.54029	0.30708	0.049437	0.97105	0.68799	0.19096
contig01174	---NA---	0.17584	0.87377	0.29401	0.9596	0.32488	0.90151	0.62461	0.25465	0.70538	0.21036	0.37845	0.54501	0.26176	0.99997	0.2244	0.84886	0.74109	0.044969	0.41574	0.44392	0.17953	0.87196	0.1155	0.87157
contig01189	---NA---	0.92192	0.09333	0.51693	0.77976	0.37044	0.86324	0.768	0.12587	0.82958	0.13152	0.17606	0.80878	0.15199	0.99997	0.42941	0.58795	1.4007	0.00067793	0.86903	0.053503	0.0041683	0.9974	0.59304	0.23257
contig01192	ABCE1_HUMANRecName: Full=ATP-binding cassette sub-family E member 1; AltName: Full=2'-5'-oligoadenylate-binding protein; AltName: Full=HuHP68; AltName: Full=RNase L inhibitor; AltName: Full=Ribonuclease 4 inhibitor; Short=RNS4I	0.56724	0.47367	-0.24125	0.98482	-0.45988	0.84292	-0.15278	0.88676	0.13217	0.91797	0.028474	0.97881	-0.77677	0.73212	-0.34185	0.75915	0.93897	0.027842	0.47792	0.44259	-0.16569	0.90438	0.12196	0.881
contig01206	---NA---	0.29058	0.73961	0.011958	0.99857	0.0014758	0.99974	0.14828	0.86823	0.61255	0.28096	0.63483	0.28352	-0.13629	0.99997	-0.29555	0.75676	0.95024	0.010946	0.35206	0.52997	-0.15209	0.89542	-0.043023	0.95562
contig01212	---NA---	1.8298	0.25935	0.26595	0.99448	0.63672	0.94054	1.0297	0.5568	0.56762	0.81313	-1.5547	0.33183	0.27569	0.99997	0.73271	0.78936	2.2321	0.025007	2.5249	0.040222	1.3568	0.51207	2.4328	0.066618
contig01239	QCR2_BOVINRecName: Full=Cytochrome b-c1 complex subunit 2, mitochondrial; AltName: Full=Complex III subunit 2; AltName: Full=Core protein II; AltName: Full=Ubiquinol-cytochrome-c reductase complex core protein 2; Flags: Precursor	0.53303	0.49895	0.058146	0.99556	0.15148	0.96995	0.2482	0.78278	0.2196	0.83205	-0.32402	0.66275	-0.0088174	0.99997	0.53074	0.54323	0.90145	0.029994	0.6897	0.20245	0.028776	0.98707	0.71888	0.20171
contig01243	---NA---	0.038359	0.97583	0.0054306	0.9987	0.30737	0.87309	0.95759	0.015108	0.069956	0.94482	-0.042275	0.95476	0.25118	0.99997	0.24289	0.76613	0.93976	0.0037621	0.65793	0.086415	0.18927	0.82431	-0.053794	0.93297
contig01266	---NA---	-0.060475	0.98643	0.057473	0.99792	1.049	0.88028	1.5004	0.35593	-0.79641	0.60169	0.61113	0.70882	-0.023028	0.99997	-0.4571	0.86606	1.7064	0.039726	0.23192	0.87431	0.85912	0.69543	0.66076	0.60404
contig01267	DECR2_DANRERecName: Full=Peroxisomal 2,4-dienoyl-CoA reductase; AltName: Full=2,4-dienoyl-CoA reductase 2	0.31811	0.81174	0.13222	0.99451	0.16434	0.97454	0.1935	0.87484	0.9354	0.21624	0.05631	0.96256	0.27391	0.99997	0.86454	0.35854	1.2303	0.015009	0.37422	0.64783	-0.2189	0.88706	0.75908	0.27242
contig01293	---NA---	0.77754	0.59946	-0.064994	0.99719	0.28524	0.97519	-0.15979	0.9461	0.29724	0.89673	0.99201	0.40116	0.45562	0.99997	0.80941	0.78558	1.9231	0.020679	1.0156	0.30743	0.039894	0.99039	-0.39689	0.77674
contig01304	---NA---	0.25877	0.72195	-0.00063296	0.99986	-0.10594	0.97356	0.39306	0.448	0.31305	0.58417	-0.55331	0.27462	0.13227	0.99997	0.55453	0.34743	0.72162	0.021714	0.53486	0.18472	0.17198	0.84917	0.51833	0.22399
contig01331	---NA---	0.46741	0.80358	0.14616	0.99454	0.51846	0.93628	0.54389	0.69403	0.048	0.98529	-1.7353	0.17244	0.53085	0.99997	0.46418	0.82445	0.40964	0.68598	1.8361	0.037747	1.3701	0.32189	1.6387	0.084419
contig01360	---NA---	0.49324	0.83581	0.24664	0.9938	-0.051963	0.99686	-0.39801	0.84289	-0.98248	0.50535	0.0086964	0.99569	-0.29258	0.99997	-0.52164	0.84548	-1.7077	0.044306	-0.6289	0.65492	-1.0103	0.59606	-1.1415	0.34285
contig01377	EF1A_SCHCORecName: Full=Elongation factor 1-alpha; Short=EF-1-alpha	0.24319	0.75059	-0.093174	0.9938	0.053446	0.99089	0.45642	0.35258	0.14823	0.85773	0.087674	0.9014	0.033863	0.99997	0.097136	0.94392	0.95055	0.0041245	1.0234	0.010388	0.84551	0.14258	1.0186	0.016692
contig01380	EF1A3_MUCCLRecName: Full=Elongation factor 1-alpha; Short=EF-1-alpha	0.075481	0.93988	-0.084333	0.9938	0.026404	0.99544	0.50546	0.21302	0.16763	0.79983	0.035671	0.95813	0.041183	0.99997	0.20942	0.78506	1.0495	0.00083782	0.85762	0.014716	0.53866	0.32246	0.7873	0.034861
contig01391	RTBS_DROMERecName: Full=Probable RNA-directed DNA polymerase from transposon BS; AltName: Full=Reverse transcriptase	0.51047	0.70964	-0.20786	0.9938	-0.35939	0.9459	-0.17572	0.90968	0.2516	0.87761	-0.71263	0.46858	0.085892	0.99997	0.90933	0.43805	1.2132	0.041574	0.18309	0.88024	-0.16425	0.93896	0.60482	0.49405
contig01425	GST5_CAEELRecName: Full=Probable glutathione S-transferase 5; AltName: Full=GST class-sigma	0.041035	0.98892	-0.68668	0.92303	1.2633	0.7374	1.1202	0.51242	-0.10011	0.96367	0.66092	0.55377	0.42912	0.99997	-0.11069	0.97791	1.6727	0.013968	1.1812	0.16613	0.31247	0.89263	0.31841	0.78268
contig01445	MED11_AEDAERecName: Full=Mediator of RNA polymerase II transcription subunit 11; AltName: Full=Mediator complex subunit 11	0.5375	0.57008	-0.3738	0.95998	0.14568	0.97724	0.69513	0.34543	0.42066	0.64904	0.63364	0.41408	-0.24003	0.99997	-0.74539	0.42007	1.0744	0.024159	0.64041	0.32917	0.44435	0.70425	0.60303	0.37066
contig01446	CF299_XENLARecName: Full=Cilia- and flagella-associated protein 299	0.2262	0.80952	0.29918	0.9585	0.19337	0.94886	0.80353	0.090702	0.24652	0.7469	0.33194	0.57903	0.23697	0.99997	0.001726	0.99921	0.7564	0.031208	0.67907	0.12374	0.29421	0.74392	0.058765	0.93574
contig01447	SEC20_MOUSERecName: Full=Vesicle transport protein SEC20	0.69597	0.50611	0.9904	0.57805	0.79746	0.68496	1.9108	0.0058003	0.45763	0.67513	0.56692	0.53879	0.34141	0.99997	0.79846	0.4639	0.85821	0.11047	0.41498	0.64416	-0.11217	0.95691	0.48124	0.56381
contig01449	SDHA_DANRERecName: Full=Succinate dehydrogenase	0.9625	0.54063	1.3077	0.68337	-0.16414	0.9886	-0.48645	0.77974	-0.15767	0.95864	0.80065	0.55486	1.3607	0.99997	1.361	0.58165	2.3759	0.019033	1.5078	0.20144	0.025787	0.99543	0.18974	0.9357
contig01456	---NA---	0.97888	0.19028	0.46722	0.92957	0.50057	0.8455	0.97133	0.13943	0.92458	0.19253	1.0769	0.15097	0.34321	0.99997	-0.75045	0.47943	1.4085	0.0044776	0.17973	0.8453	-0.21428	0.89873	0.20239	0.83327
contig01464	AIFM1_HUMANRecName: Full=Apoptosis-inducing factor 1, mitochondrial; AltName: Full=Programmed cell death protein 8; Flags: Precursor	1.1755	0.18137	0.68651	0.88498	1.1859	0.54584	1.8695	0.046144	-0.045085	0.98004	0.055179	0.97546	-0.86303	0.99997	0.051252	0.98892	0.56543	0.33381	-0.1125	0.92287	0.71811	0.59025	0.022638	0.9862
contig01467	---NA---	0.47223	0.62258	-0.46848	0.92601	-0.27119	0.94606	-0.22805	0.83216	0.28162	0.79162	-0.30209	0.72189	-0.30497	0.99997	-0.041433	0.98924	1.1702	0.012301	-0.095121	0.92303	-0.55994	0.57924	0.34512	0.63572
contig01469	MAP2_HUMANRecName: Full=Methionine aminopeptidase 2; Short=MAP 2; Short=MetAP 2; AltName: Full=Initiation factor 2-associated 67 kDa glycoprotein; Short=p67; Short=p67eIF2; AltName: Full=Peptidase M	0.11003	0.89404	-0.27043	0.92597	0.039818	0.99197	0.37818	0.35921	0.44015	0.28181	-0.32534	0.45075	-0.13464	0.99997	-0.056777	0.96716	0.86189	0.0023825	0.54309	0.099267	0.16709	0.819	0.50724	0.15496
contig01471	MAP2_HUMANRecName: Full=Methionine aminopeptidase 2; Short=MAP 2; Short=MetAP 2; AltName: Full=Initiation factor 2-associated 67 kDa glycoprotein; Short=p67; Short=p67eIF2; AltName: Full=Peptidase M	0.89117	0.013237	0.68091	0.12636	0.47532	0.46071	0.65711	0.047811	0.62042	0.10614	0.18844	0.67954	0.11556	0.99997	0.49386	0.28644	1.2242	6.3444e-05	0.7992	0.012571	0.19524	0.76616	0.35405	0.31812
contig01472	---NA---	0.6248	0.19657	0.03842	0.9957	0.012267	0.99794	0.22346	0.71323	0.38437	0.45149	-0.24276	0.65336	-0.20537	0.99997	-0.25089	0.74912	0.96313	0.0030041	0.57959	0.13186	0.10853	0.91564	0.2804	0.54072
contig01474	---NA---	1.2045	0.007165	0.23304	0.97295	0.059326	0.99036	0.0049444	0.99552	0.40984	0.44736	0.16891	0.78851	-0.26158	0.99997	0.10565	0.93875	0.70923	0.028245	0.20882	0.70557	-0.28017	0.73149	-0.12861	0.82478
contig01492	---NA---	0.93766	0.4106	0.46197	0.9741	0.95833	0.67141	1.6275	0.054234	0.89477	0.38628	-0.31285	0.80717	0.3476	0.99997	-0.073661	0.98715	2.0892	0.0024382	1.8031	0.024252	1.405	0.24873	1.5389	0.072803
contig01494	---NA---	0.45461	0.66799	-0.033408	0.99792	0.46547	0.90244	1.3513	0.057234	0.12612	0.93327	-1.0077	0.1946	0.37392	0.99997	0.16516	0.93496	0.94406	0.048543	1.52	0.012598	1.0703	0.24226	1.1602	0.071733
contig01502	---NA---	0.85909	0.32327	-0.28968	0.98522	-0.077953	0.99197	0.62775	0.46672	0.52793	0.57169	0.096774	0.93625	0.12535	0.99997	-0.20001	0.92264	1.7066	0.0022086	1.1538	0.072014	0.47489	0.71187	0.58807	0.42922
contig01517	---NA---	0.73292	0.14595	-0.29624	0.94625	0.66949	0.37304	0.65076	0.15462	0.36659	0.52085	0.040377	0.95934	-0.10795	0.99997	-0.19432	0.85334	1.1601	0.001318	0.66328	0.10472	0.073485	0.95198	0.46122	0.31218
contig01518	---NA---	0.3985	0.35663	-0.18185	0.97315	0.5427	0.32576	0.68289	0.036724	0.60899	0.11122	0.12041	0.812	-0.016992	0.99997	-0.07497	0.94689	0.88481	0.0014435	0.71134	0.023818	0.37737	0.46954	0.47939	0.15984
contig01520	---NA---	0.71302	0.19993	-0.31698	0.94625	0.49372	0.70091	0.39872	0.50672	0.29787	0.66807	-0.041128	0.96133	-0.094945	0.99997	-0.19973	0.86164	1.2417	0.001318	0.64345	0.14821	0.098786	0.93648	0.36801	0.4726
contig01527	---NA---	0.057821	0.98636	-0.049565	0.99792	0.0052382	0.99965	0.62964	0.71727	0.62582	0.73647	0.72564	0.58337	0.31469	0.99997	0.042257	0.99444	1.6259	0.03701	1.1001	0.36936	0.36989	0.89109	-0.12722	0.94354
contig01529	---NA---	0.19406	0.84471	-0.087586	0.99454	-0.14204	0.96696	-0.0298	0.9772	0.30289	0.66119	-0.31438	0.60151	0.039902	0.99997	0.29349	0.74552	0.78776	0.025266	0.075495	0.91938	-0.071881	0.95691	0.18434	0.75859
contig01539	---NA---	-0.58523	0.79054	-0.93225	0.90065	-0.76919	0.91667	-1.0853	0.50473	-0.86005	0.5772	0.44654	0.78702	-0.89488	0.99997	0.032191	0.99649	3.5274	0.00041999	1.694	0.1641	-0.19872	0.95552	0.54226	0.73348
contig01582	SPTB2_HUMANRecName: Full=Spectrin beta chain, non-erythrocytic 1; AltName: Full=Beta-II spectrin; AltName: Full=Fodrin beta chain; AltName: Full=Spectrin, non-erythroid beta chain 1	0.60248	0.48068	-0.013739	0.99864	-0.25647	0.94796	-0.071146	0.95459	-1.0564	0.12596	-0.024956	0.98254	-0.074927	0.99997	1.1234	0.13086	0.9478	0.037556	0.45075	0.51536	-0.23784	0.85846	0.23127	0.76909
contig01618	PRO1A_ACACARecName: Full=Profilin-1A; AltName: Full=Acidic profilin IA; AltName: Full=Profilin IA	0.84102	0.26146	0.19354	0.9938	0.14068	0.9772	0.59584	0.42554	0.41412	0.63916	0.31516	0.7052	0.3259	0.99997	0.88126	0.2927	1.209	0.0097735	0.51908	0.43596	0.50933	0.62588	0.64741	0.31073
contig01627	---NA---	0.52444	0.55199	-0.29034	0.98056	-0.10783	0.98709	0.64139	0.43556	0.48119	0.54583	0.067658	0.95002	0.63946	0.99997	0.022295	0.99496	1.5317	0.0018352	1.1418	0.04071	0.24602	0.86773	0.66705	0.34481
contig01637	LEO1_PONABRecName: Full=RNA polymerase-associated protein LEO1	-0.96329	0.627	-0.094515	0.99719	-0.36953	0.97131	-0.15666	0.95122	0.31472	0.92049	0.049112	0.98331	0.9307	0.99997	5.1181	0.01458	0.22398	0.87266	0.79728	0.64356	2.7251	0.3344	0.31782	0.87431
contig01683	---NA---	0.58393	0.32222	0.2291	0.98049	0.45558	0.75809	1.011	0.024934	0.64362	0.22656	0.44112	0.43928	0.22196	0.99997	0.15508	0.90469	0.88584	0.012734	0.70965	0.10472	0.35702	0.66632	0.55755	0.24571
contig01684	CYT_CHIGURecName: Full=Cystatin-1; AltName: Full=Cystatin JZTX-75; Flags: Precursor	0.58553	0.49063	-0.24436	0.98865	-0.20929	0.96114	0.21712	0.83733	0.48189	0.54936	-0.12519	0.90154	-0.22159	0.99997	-0.27473	0.84659	1.1964	0.0094743	0.49658	0.45275	0.045188	0.97918	0.5688	0.37527
contig01686	CI116_DANRERecName: Full=UPF0691 protein C9orf116 homolog	0.20767	0.81355	0.34046	0.92229	0.50917	0.63467	1.0721	0.010097	0.62112	0.21036	0.30856	0.58051	0.18892	0.99997	-0.039165	0.9866	0.75709	0.02162	0.46357	0.29954	0.15704	0.87277	0.068166	0.91818
contig01687	ARMC8_DANRERecName: Full=Armadillo repeat-containing protein 8	0.32081	0.74168	-0.012774	0.99861	-0.0090868	0.99857	0.0014285	0.99939	0.62246	0.33347	0.11133	0.90341	-0.22204	0.99997	0.1249	0.9443	1.1943	0.0049413	0.29985	0.6545	-0.39951	0.68481	0.11768	0.87959
contig01688	---NA---	0.21344	0.90329	0.095371	0.99454	-0.6975	0.82349	-1.0986	0.2247	-0.97784	0.24616	0.0089071	0.99377	0.60463	0.99997	1.6407	0.044331	0.53266	0.32499	0.20911	0.8464	0.69506	0.563	1.233	0.09569
contig01702	SAP_CHICKRecName: Full=Prosaposin; AltName: Full=Proactivator polypeptide; Contains: RecName: Full=Saposin-A; Contains: RecName: Full=Saposin-B; Contains: RecName: Full=Saposin-C; Contains: RecName: Full=Saposin-D; Flags: Precursor	-0.25569	0.83221	-0.46899	0.90977	0.17718	0.96659	0.27627	0.76458	-0.19629	0.86699	-0.35355	0.64588	-0.024997	0.99997	0.40311	0.70657	1.0909	0.013525	0.41508	0.53363	-0.0059074	0.997	0.66831	0.2677
contig01703	---NA---	0.53055	0.5369	0.0037346	0.99948	0.37298	0.90627	0.52448	0.48069	0.62326	0.37887	-0.37336	0.62762	0.04579	0.99997	0.43636	0.6758	1.2624	0.005939	0.87966	0.11069	0.08673	0.95926	0.81177	0.17539
contig01704	---NA---	0.14924	0.8799	-0.13995	0.9938	0.21282	0.93756	0.63767	0.16428	0.53456	0.29168	-0.29742	0.59382	0.033848	0.99997	0.26817	0.74957	0.70337	0.031026	0.64072	0.11698	0.093532	0.93556	0.73116	0.092245
contig01705	---NA---	-0.87751	0.35663	-1.754	0.040968	-1.2059	0.3163	-1.6102	0.02445	-0.3621	0.77187	-1.4355	0.09507	-1.6026	0.13064	-1.2895	0.16899	0.35463	0.52029	-0.23319	0.82483	-0.38822	0.79572	0.30813	0.74274
contig01707	---NA---	0.43654	0.38769	0.469	0.68104	0.3068	0.8455	0.59784	0.13727	0.69735	0.11279	0.35556	0.45242	0.29448	0.99997	0.26559	0.70856	0.77178	0.0092183	0.43094	0.2692	0.41256	0.49097	0.43034	0.28331
contig01708	EF1A1_RATRecName: Full=Elongation factor 1-alpha 1; Short=EF-1-alpha-1; AltName: Full=Elongation factor Tu; Short=EF-Tu; AltName: Full=Eukaryotic elongation factor 1 A-1; Short=eEF1A-1	0.081794	0.94307	0.10827	0.9938	0.20177	0.94054	0.41236	0.42741	0.0027387	0.99882	-0.077456	0.91491	-0.1387	0.99997	0.13488	0.91059	0.6856	0.030864	0.88053	0.026178	0.61758	0.31793	0.75218	0.076496
contig01725	EXOC4_HUMANRecName: Full=Exocyst complex component 4; AltName: Full=Exocyst complex component Sec8	0.21206	0.88734	-0.52396	0.90966	0.016373	0.99857	0.34839	0.7222	0.14972	0.91857	-0.011126	0.9917	-0.42888	0.99997	-0.4427	0.71245	1.2776	0.010111	0.65443	0.33157	0.22557	0.87858	0.4392	0.55029
contig01727	DLDH_HUMANRecName: Full=Dihydrolipoyl dehydrogenase, mitochondrial; AltName: Full=Dihydrolipoamide dehydrogenase; AltName: Full=Glycine cleavage system L protein; Flags: Precursor	0.57118	0.19314	0.42889	0.71784	0.69445	0.17221	1.2455	0.00031369	0.42198	0.33584	-0.19966	0.68841	0.25993	0.99997	0.66516	0.14671	0.77143	0.0070516	0.83024	0.016887	0.47864	0.38475	0.77305	0.036762
contig01733	HSP7C_HUMANRecName: Full=Heat shock cognate 71 kDa protein; AltName: Full=Heat shock 70 kDa protein 8; AltName: Full=Lipopolysaccharide-associated protein 1; Short=LAP-1; Short=LPS-associated protein 1	0.18717	0.80971	0.033453	0.99639	0.029788	0.99544	0.11851	0.86766	-0.11549	0.88574	-0.3963	0.40266	0.046552	0.99997	0.35047	0.57484	0.69139	0.018463	0.50897	0.17278	0.24818	0.73734	0.43609	0.2791
contig01734	HSP70_ONCMYRecName: Full=Heat shock cognate 70 kDa protein; Short=HSP70	0.5955	0.46063	-0.19832	0.99367	-0.048108	0.99529	-0.24209	0.80526	-0.43425	0.5915	-0.30184	0.70516	-0.17059	0.99997	0.11627	0.95673	0.93822	0.032136	0.61776	0.30203	0.44373	0.66939	0.50104	0.42782
contig01735	HSP7C_DANRERecName: Full=Heat shock cognate 71 kDa protein; AltName: Full=Heat shock 70 kDa protein 8	0.42128	0.47255	0.3894	0.85971	0.24897	0.92324	0.60642	0.17676	0.54053	0.26588	-0.028728	0.97093	0.50536	0.86724	0.50026	0.41554	0.72495	0.022689	0.56537	0.16131	0.40636	0.54806	0.58823	0.17042
contig01737	---NA---	0.85389	0.043219	0.22288	0.96094	0.023529	0.99576	0.12585	0.85291	0.24706	0.6579	-0.0067487	0.99138	0.43213	0.91159	0.4488	0.41612	0.81075	0.0060223	0.6536	0.063849	0.32664	0.60739	0.56156	0.14229
contig01740	---NA---	0.87114	0.24788	0.13229	0.9938	-0.18822	0.96659	0.050888	0.96877	0.75748	0.29004	0.089579	0.934	-0.024032	0.99997	0.058418	0.98548	1.109	0.017276	1.003	0.080732	0.30377	0.81008	0.88994	0.1532
contig01753	---NA---	0.58472	0.18501	0.39434	0.78285	0.38099	0.72795	0.5976	0.12027	0.51632	0.22306	0.2292	0.64133	0.042219	0.99997	0.035633	0.98524	1.001	0.0012082	0.42387	0.25645	-0.044074	0.96613	0.030081	0.95895
contig01757	---NA---	0.89094	0.043025	0.47792	0.68337	0.42143	0.69624	0.30803	0.55583	0.57182	0.19997	-0.12353	0.84076	0.3431	0.99997	0.66738	0.18939	0.95563	0.0025475	0.55845	0.13548	0.48518	0.40968	0.73874	0.06171
contig01761	---NA---	0.69973	0.58063	-0.017138	0.99864	0.17963	0.97983	0.71125	0.50966	0.67652	0.54483	-0.19746	0.88653	-0.061739	0.99997	0.76837	0.56527	1.4512	0.02171	0.77562	0.38519	0.54463	0.73149	1.096	0.19948
contig01764	TBB4_XENLARecName: Full=Tubulin beta-4 chain	0.7823	0.094834	0.11311	0.9938	0.12981	0.96522	0.046677	0.95586	0.15221	0.8488	-0.2329	0.67583	0.3023	0.99997	0.3765	0.56897	1.4113	0.00013838	0.70339	0.067169	0.26338	0.73864	0.93212	0.025336
contig01773	---NA---	0.18526	0.93742	-0.74036	0.89301	-0.055968	0.9958	0.54235	0.71407	0.12974	0.95323	-0.4608	0.70176	-0.9426	0.99997	-0.26582	0.91806	1.6642	0.013719	1.1944	0.15866	-0.1488	0.95198	0.98895	0.28224
contig01776	---NA---	0.015158	0.99454	-0.60624	0.88685	0.011318	0.99857	0.67144	0.44896	0.37324	0.74864	0.028016	0.98331	0.08948	0.99997	0.22942	0.90904	1.4445	0.0085001	0.1488	0.89256	0.64558	0.58421	0.81919	0.26896
contig01789	---NA---	0.36023	0.50824	-0.10636	0.9938	0.26483	0.88939	0.56225	0.15813	0.22109	0.70536	-0.10026	0.8695	-0.053057	0.99997	-0.16039	0.86531	0.74808	0.010041	0.5272	0.14419	0.19582	0.80008	0.25169	0.56079
contig01792	---NA---	0.956	0.58306	0.099089	0.99639	0.72883	0.90627	0.77863	0.62525	1.1859	0.39479	1.4648	0.29374	-0.6006	0.99997	-1.3336	0.42797	1.7217	0.044554	0.56485	0.70057	0.49329	0.84013	0.55931	0.68988
contig01812	METH_VIBPARecName: Full=Methionine synthase; AltName: Full=5-methyltetrahydrofolate--homocysteine methyltransferase; AltName: Full=Methionine synthase, vitamin-B12 dependent; Short=MS	-0.43817	0.70199	-0.99979	0.47593	0.037504	0.99611	-0.12728	0.92375	-0.29803	0.80269	-0.94637	0.24663	-0.22364	0.99997	0.19674	0.9217	1.4073	0.0068183	0.25044	0.7839	-0.55758	0.62706	0.36871	0.64538
contig01813	METH_CAEELRecName: Full=Probable methionine synthase; AltName: Full=5-methyltetrahydrofolate--homocysteine methyltransferase; AltName: Full=Vitamin-B12 dependent methionine synthase; Short=MS	-0.68552	0.25346	-0.96329	0.14541	-0.21981	0.94592	-0.13475	0.88279	-0.18548	0.84108	-0.78267	0.18396	-0.11369	0.99997	0.21703	0.854	0.99992	0.0079486	0.46269	0.37044	0.13487	0.91198	0.61479	0.21747
contig01848	RTXE_DROMERecName: Full=Probable RNA-directed DNA polymerase from transposon X-element; AltName: Full=Reverse transcriptase	0.43993	0.44957	0.075523	0.99454	0.57932	0.48355	0.80389	0.05474	0.29872	0.62041	-0.46851	0.36174	0.11643	0.99997	0.39419	0.55877	0.65465	0.03887	0.90062	0.02342	0.32491	0.66583	0.48296	0.27275
contig01862	---NA---	-1.0297	0.51685	0.44079	0.9938	-0.36729	0.96275	0.47595	0.78966	0.30744	0.92143	2.0971	0.077994	1.291	0.99997	-0.55838	0.90497	2.9133	0.0091438	-0.032522	0.98651	1.1024	0.64817	0.30619	0.87729
contig01874	---NA---	0.33036	0.75337	0.41824	0.93661	-0.23909	0.94843	0.15623	0.88446	0.70403	0.29438	-0.082543	0.93493	0.19694	0.99997	0.49745	0.59945	0.92978	0.031092	0.33695	0.63141	-0.20583	0.87317	0.098281	0.9095
contig01885	SODC_CALJARecName: Full=Superoxide dismutase	0.99266	0.16374	0.32159	0.97711	0.26811	0.94661	0.29378	0.76009	0.19868	0.87263	0.0025201	0.99809	0.14663	0.99997	1.049	0.17679	1.3102	0.0058981	0.3978	0.58033	0.25235	0.84889	0.89974	0.14508
contig01897	EIF3I_XENTRRecName: Full=Eukaryotic translation initiation factor 3 subunit I; Short=eIF3i; AltName: Full=Eukaryotic translation initiation factor 3 subunit 2; AltName: Full=eIF-3-beta; AltName: Full=eIF3 p36	-0.002847	0.99881	-0.30409	0.92842	-0.031816	0.99544	0.20991	0.73826	-0.029767	0.97637	-0.85354	0.069687	0.40085	0.9972	0.54337	0.34662	0.41525	0.16466	0.65572	0.08551	0.61654	0.29819	0.92558	0.024607
contig01898	EIF3I_DANRERecName: Full=Eukaryotic translation initiation factor 3 subunit I; Short=eIF3i; AltName: Full=Eukaryotic translation initiation factor 3 subunit 2; AltName: Full=eIF-3-beta; AltName: Full=eIF3 p36	0.4417	0.75898	-0.12526	0.99454	0.14735	0.98278	0.26085	0.85194	0.80578	0.39479	0.1456	0.91347	0.42539	0.99997	0.21752	0.92739	1.1773	0.043257	1.0163	0.17723	0.77708	0.52839	1.3845	0.07684
contig01912	THIOM_RATRecName: Full=Thioredoxin, mitochondrial; Short=MTRX; Short=Mt-Trx; AltName: Full=Thioredoxin-2; Flags: Precursor	0.66786	0.38583	-0.15918	0.9938	0.56253	0.76958	1.3899	0.013724	0.90554	0.17567	0.47409	0.51991	-0.36604	0.99997	-0.44517	0.66705	1.6712	0.0007952	1.0681	0.051371	0.17512	0.9027	0.53683	0.39364
contig01917	SEPP1_RATRecName: Full=Selenoprotein P; Short=SeP; Contains: RecName: Full=Selenoprotein Se-P10; Contains: RecName: Full=Selenoprotein Se-P6; Contains: RecName: Full=Selenoprotein Se-P2; Contains: RecName: Full=Selenoprotein Se-P1; Flags: Precursor	-0.72591	0.76505	0.0093794	0.99948	-0.15573	0.99135	0.23107	0.92982	-0.18886	0.95391	2.2421	0.14892	0.1172	0.99997	-0.31995	0.94802	1.9782	0.04242	0.13344	0.95261	-0.90124	0.74873	-0.026391	0.99137
contig01953	---NA---	0.51613	0.19646	0.034165	0.99558	0.65568	0.13902	0.94681	0.002882	0.54838	0.15161	0.086083	0.87467	-0.0091945	0.99997	0.24528	0.68518	1.1279	0.00016821	0.84559	0.0083282	0.64446	0.15994	0.95169	0.005271
contig01964	---NA---	0.15877	0.8394	0.10208	0.9938	-0.019461	0.99645	0.13036	0.84413	0.42353	0.34133	-0.23615	0.63052	0.23429	0.99997	0.45418	0.40031	0.77464	0.0074474	0.62751	0.072238	0.54736	0.31672	0.83144	0.027232
contig01965	GID4_MOUSERecName: Full=Glucose-induced degradation protein 4 homolog; AltName: Full=Vacuolar import and degradation protein 24 homolog	0.095415	0.91863	-0.31313	0.89197	0.19067	0.93429	0.65745	0.080295	0.70155	0.096822	0.010289	0.98819	-0.18213	0.99997	0.010969	0.99604	1.1957	0.00026505	0.92455	0.0093552	0.21051	0.77447	0.62749	0.092613
contig01966	---NA---	0.23538	0.76416	0.36883	0.88018	0.52648	0.56614	1.0515	0.0088982	0.71496	0.13509	0.43763	0.39371	0.19184	0.99997	-0.028436	0.98924	0.77175	0.01593	0.58304	0.14681	0.24101	0.76949	0.19239	0.71154
contig01969	---NA---	0.54015	0.70176	0.30805	0.99119	-0.11421	0.99012	-0.12726	0.93923	0.75987	0.46713	-0.18056	0.89591	-0.33916	0.99997	0.54622	0.72411	1.4683	0.018786	0.40467	0.70195	-0.14433	0.95043	0.65018	0.4733
contig01972	---NA---	-0.072987	0.98207	-0.61915	0.95957	0.78438	0.87068	1.2515	0.28373	0.41988	0.82849	-0.79381	0.54502	-0.1713	0.99997	0.3597	0.90015	1.7201	0.027791	1.5126	0.12252	1.0608	0.51526	1.9776	0.058967
contig01975	---NA---	0.25115	0.7501	-0.11478	0.9938	0.47257	0.68687	0.83976	0.048956	0.55813	0.26342	-0.25674	0.65782	-0.10945	0.99997	0.15598	0.89328	1.1899	0.001051	0.89954	0.026423	0.53726	0.40525	0.99566	0.022999
contig01992	---NA---	1.2674	0.18823	0.68575	0.89001	0.69594	0.81814	0.92912	0.31632	0.71489	0.49292	0.51272	0.62999	0.92945	0.9069	1.2341	0.26054	2.3404	0.00069257	2.1573	0.0055337	1.2091	0.30817	1.4502	0.074533
contig01993	---NA---	1.3217	0.088415	0.88316	0.63784	0.48493	0.88549	0.56459	0.5272	0.70258	0.39842	0.55493	0.51745	1.2054	0.35754	1.3671	0.090308	2.112	0.00039095	1.9538	0.0027253	1.3317	0.15928	1.23	0.073483
contig02027	---NA---	0.33646	0.75822	-0.47625	0.91159	0.10274	0.98526	0.32859	0.71128	0.4158	0.623	0.50498	0.49296	-0.33005	0.99997	-0.70245	0.41701	1.0022	0.024977	0.33355	0.64817	0.4047	0.71608	0.46851	0.47221
contig02030	---NA---	0.43142	0.65548	-0.50335	0.88915	0.31715	0.93429	0.35043	0.68665	0.29352	0.76951	0.4154	0.58497	-0.38378	0.99997	-0.71845	0.4024	0.88351	0.046181	0.34063	0.64038	0.40896	0.71319	0.47444	0.46617
contig02050	PGBM_MOUSERecName: Full=Basement membrane-specific heparan sulfate proteoglycan core protein; Short=HSPG; Contains: RecName: Full=Endorepellin; Contains: RecName: Full=LG3 peptide; Flags: Precursor	0.16147	0.91824	-0.57308	0.86606	0.3924	0.90941	0.81648	0.23827	0.2661	0.81684	-0.2571	0.77923	-0.31371	0.99997	0.074134	0.9798	0.96285	0.040604	0.22683	0.79341	0.11995	0.94415	0.4592	0.51465
contig02087	---NA---	0.16598	0.88926	-0.2262	0.98456	0.07422	0.98919	0.72069	0.19278	0.52134	0.40497	-0.20838	0.78104	-0.3804	0.99997	0.073539	0.97229	0.76902	0.045138	0.55031	0.29541	0.36921	0.69579	0.85251	0.097779
contig02122	---NA---	0.23111	0.76531	0.14745	0.99367	1.1411	0.0085338	1.8114	4.096e-06	0.2981	0.61181	0.053984	0.9414	0.19842	0.99997	0.85264	0.076482	1.1976	0.00069856	1.2717	0.0012246	0.97064	0.067415	1.4247	0.00059681
contig02137	DAAF5_MOUSERecName: Full=Dynein assembly factor 5, axonemal; AltName: Full=HEAT repeat-containing protein 2	-0.98106	0.55353	1.4634	0.63576	-0.33985	0.98208	0.82425	0.68982	0.10465	0.97628	0.99595	0.47142	0.56464	0.99997	-0.30841	0.93574	2.016	0.010724	0.37482	0.78165	0.079253	0.98022	-0.5319	0.69624
contig02149	SKP1_HUMANRecName: Full=S-phase kinase-associated protein 1; AltName: Full=Cyclin-A/CDK2-associated protein p19; Short=p19A; AltName: Full=Organ of Corti protein 2; Short=OCP-2; AltName: Full=Organ of Corti protein II; Short=OCP-II; AltName: Full=RNA polymerase II elongation factor-like protein; AltName: Full=SIII; AltName: Full=Transcription elongation factor B polypeptide 1-like; AltName: Full=…	0.12816	0.9368	-0.76616	0.65465	-0.25759	0.94761	-0.25709	0.79872	-0.39279	0.66119	-0.70786	0.33514	-0.41277	0.99997	-0.1148	0.95891	1.0092	0.026959	0.1725	0.84584	-0.3318	0.78381	0.22457	0.77573
contig02167	---NA---	0.51039	0.61255	-0.45457	0.94095	0.069724	0.99239	0.40621	0.66288	0.052893	0.97432	-0.38503	0.65782	0.72903	0.92896	1.1219	0.17627	1.0746	0.027825	0.95712	0.11748	0.59308	0.58062	0.59727	0.39062
contig02182	NTPPA_THEONRecName: Full=dTTP/UTP pyrophosphatase; Short=dTTPase/UTPase; AltName: Full=Nucleoside triphosphate pyrophosphatase; AltName: Full=Nucleotide pyrophosphatase; Short=Nucleotide PPase	0.3291	0.88459	-0.030435	0.99792	0.59527	0.91938	0.48612	0.7529	0.55509	0.71824	0.29589	0.84791	-0.051286	0.99997	-0.39336	0.89408	1.7257	0.037169	0.065444	0.97126	-0.69893	0.70012	-0.23368	0.86853
contig02201	NPT2A_RATRecName: Full=Sodium-dependent phosphate transport protein 2A; Short=Sodium-phosphate transport protein 2A; AltName: Full=Na(+)-dependent phosphate cotransporter 2A; AltName: Full=Sodium/phosphate cotransporter 2A; Short=Na(+)/Pi cotransporter 2A; Short=NaPi-2a; AltName: Full=Solute carrier family 34 member 1	0.76882	0.4048	0.11735	0.99454	0.18289	0.97173	-0.11022	0.93789	0.42829	0.68225	0.11311	0.92474	0.072953	0.99997	0.45005	0.7326	1.2476	0.018006	0.13228	0.90371	-0.76832	0.47756	-0.14203	0.88804
contig02205	PLS1_HUMANRecName: Full=Phospholipid scramblase 1; Short=PL scramblase 1; AltName: Full=Ca(2+)-dependent phospholipid scramblase 1; AltName: Full=Erythrocyte phospholipid scramblase; AltName: Full=MmTRA1b	0.26684	0.6924	0.089572	0.9938	0.10582	0.97089	0.58959	0.15907	0.7858	0.078982	0.15496	0.79065	0.11537	0.99997	0.33628	0.61544	1.1739	0.00058361	0.72969	0.049284	0.062826	0.95552	0.47701	0.24467
contig02209	---NA---	0.5614	0.5054	-0.094107	0.99454	0.070859	0.99135	0.10081	0.93218	0.91414	0.17232	0.53044	0.46376	-0.26987	0.99997	-0.51418	0.59421	1.3294	0.0041545	0.24379	0.75475	0.020325	0.99075	0.30635	0.66611
contig02210	---NA---	0.11761	0.90268	-0.12144	0.9938	0.10529	0.97215	0.55157	0.20673	0.22084	0.73228	-0.13779	0.8226	0.020307	0.99997	-0.17162	0.86342	0.74861	0.014724	0.70876	0.059	0.44261	0.4799	0.32263	0.46517
contig02212	---NA---	0.18643	0.81072	-0.064394	0.99454	-0.23021	0.92254	-0.11952	0.86652	0.3674	0.45107	-0.067282	0.91913	-0.10418	0.99997	0.22454	0.77353	0.77471	0.0093044	0.11658	0.83549	-0.28515	0.68614	0.29756	0.48962
contig02217	---NA---	-0.16178	0.85419	-0.82308	0.12595	0.21201	0.93429	0.10021	0.89748	0.25107	0.68223	-0.21567	0.69671	-0.66217	0.46499	-0.70716	0.17258	0.94003	0.0036062	-0.0034773	0.99662	-0.52253	0.39142	0.27373	0.55563
contig02218	---NA---	-0.14445	0.902	-0.38198	0.92414	0.093024	0.98305	0.026443	0.98089	0.60384	0.29516	0.54815	0.3607	-0.41241	0.99997	-0.72462	0.28357	0.94885	0.011855	0.10575	0.88965	-0.31538	0.73861	0.091852	0.89956
contig02219	---NA---	-0.050435	0.96469	-0.56676	0.45921	0.35484	0.77624	0.28619	0.56794	0.31156	0.52974	-0.037423	0.95582	-0.5678	0.5649	-0.70359	0.12317	0.83726	0.0045366	0.13603	0.79249	-0.30557	0.63944	0.23157	0.59687
contig02241	CP2U1_RATRecName: Full=Cytochrome P450 2U1	-1.2041	0.55069	-2.9536	0.17877	-1.8949	0.47748	-2.9285	0.054366	-0.5128	0.84459	-2.3848	0.14245	-1.3989	0.99997	-2.06	0.27087	-0.77946	0.44042	-2.7508	0.031758	-1.2054	0.65216	-0.71525	0.66378
contig02253	---NA---	0.5241	0.66812	-0.12962	0.99454	0.52388	0.88547	0.44931	0.67488	0.90755	0.29328	0.72561	0.42467	-0.32824	0.99997	-0.73509	0.52303	1.2395	0.025933	0.49595	0.56695	0.23926	0.88937	0.29011	0.75964
contig02289	---NA---	1.0698	0.56948	-0.17069	0.99454	-2.1155	0.39404	-1.9624	0.19685	-0.20385	0.94797	0.93883	0.60338	-0.08317	0.99997	1.7925	0.37066	2.197	0.021543	1.1347	0.40036	1.1458	0.68161	2.3839	0.091303
contig02294	---NA---	-0.91096	0.15698	-0.97784	0.26791	0.063986	0.99164	0.32135	0.69087	-0.30536	0.72731	-0.012351	0.98972	-0.20479	0.99997	-0.31817	0.77476	1.0981	0.0095437	0.30757	0.65191	0.22107	0.85448	0.27443	0.68349
contig02295	METK1_MOUSERecName: Full=S-adenosylmethionine synthase isoform type-1; Short=AdoMet synthase 1; AltName: Full=Methionine adenosyltransferase 1; Short=MAT 1	-1.3885	0.087202	-1.8945	0.014439	-0.1226	0.98559	-0.90493	0.25559	-1.355	0.095666	-0.71764	0.4144	0.054653	0.99997	0.56505	0.64713	0.74787	0.15666	0.39369	0.65873	-0.11709	0.95396	0.58756	0.45209
contig02305	---NA---	0.10662	0.9324	-0.19072	0.98874	-0.23243	0.94054	0.096436	0.91871	0.37462	0.56532	-0.20016	0.77512	-0.10722	0.99997	0.26947	0.78613	0.95741	0.0096689	0.27808	0.63818	-0.25574	0.79381	0.35892	0.50504
contig02307	---NA---	0.10772	0.90014	-0.26573	0.93254	-0.058053	0.98709	0.30052	0.52086	0.37256	0.39484	-0.1546	0.76462	-0.031108	0.99997	0.24856	0.70856	0.67646	0.0138	0.33452	0.38519	0.092315	0.91948	0.41191	0.27238
contig02310	---NA---	0.4665	0.51012	0.32064	0.9542	0.32773	0.8974	-0.27042	0.71407	0.66413	0.23808	0.14026	0.85683	-0.085202	0.99997	0.14086	0.92453	0.95913	0.010887	0.2905	0.62862	0.27941	0.77235	0.48706	0.35092
contig02337	---NA---	0.31343	0.74114	-0.63885	0.68486	-0.033198	0.99566	-0.15567	0.87262	0.32238	0.68655	-0.15453	0.85259	-0.41526	0.99997	-0.92004	0.17027	0.84913	0.032248	0.5115	0.358	0.030903	0.98484	0.19206	0.78118
contig02346	---NA---	0.69051	0.13715	0.1031	0.9938	-0.024782	0.99576	0.056274	0.94467	0.32094	0.55052	-0.52786	0.28005	0.07007	0.99997	0.49873	0.38835	0.6866	0.023483	0.46984	0.24023	0.10888	0.91378	0.58948	0.14763
contig02365	---NA---	0.24584	0.88628	0.15168	0.9938	0.34106	0.94921	0.98488	0.29791	0.55039	0.59653	1.2496	0.16339	0.22057	0.99997	0.058452	0.98892	1.8564	0.0023208	1.6761	0.017846	0.32436	0.85899	0.61	0.51454
contig02366	---NA---	0.55943	0.63146	0.30195	0.98792	-0.011661	0.99857	0.41091	0.74809	0.92429	0.28096	0.55689	0.54952	1.0883	0.59431	0.79364	0.47194	0.55305	0.30528	1.8542	0.0086313	1.1477	0.28273	1.3631	0.065593
contig02370	RRT15_YEASTRecName: Full=Regulator of rDNA transcription protein 15	0.2733	0.89794	1.1129	0.67291	1.2592	0.46539	1.9463	0.025455	-0.32775	0.85159	0.48833	0.6873	-0.43162	0.99997	0.05754	0.99028	-0.0027271	0.99752	0.62135	0.55351	0.88767	0.53397	0.76034	0.43623
contig02378	---NA---	0.87873	0.21956	0.37989	0.95788	0.31621	0.93429	0.77986	0.22945	0.83736	0.21219	0.21901	0.80339	-0.0026156	0.99997	0.51604	0.59456	1.1909	0.0088009	0.81721	0.14681	0.19664	0.88518	0.70638	0.24572
contig02385	---NA---	0.14967	0.89121	0.0036974	0.99948	0.093507	0.98205	-0.020658	0.98475	0.14075	0.88484	0.065446	0.93701	-0.14261	0.99997	0.056354	0.97942	0.85826	0.015823	0.10433	0.88397	-0.21231	0.82781	0.21917	0.70347
contig02389	---NA---	0.59961	0.35919	0.81772	0.38575	0.19447	0.95528	0.76424	0.1511	0.2413	0.78086	-0.081876	0.92533	0.42321	0.99997	0.32692	0.73404	1.0693	0.0067387	1.3389	0.0060715	0.68356	0.36888	0.51895	0.33144
contig02390	---NA---	1.681	0.059685	0.96199	0.68104	0.86888	0.75215	1.755	0.04427	-0.040623	0.98504	-0.17279	0.89589	-0.009636	0.99997	-0.08002	0.98336	2.1506	0.0012082	1.2665	0.087808	0.029762	0.99015	0.87897	0.28536
contig02409	PIGL_BOVINRecName: Full=N-acetylglucosaminyl-phosphatidylinositol de-N-acetylase; AltName: Full=Phosphatidylinositol-glycan biosynthesis class L protein; Short=PIG-L	0.54781	0.69185	-0.39248	0.98162	0.057928	0.99544	0.19142	0.9031	1.007	0.29004	0.39915	0.72483	0.029	0.99997	0.42484	0.81022	1.2317	0.043296	0.41423	0.68942	-0.40783	0.80863	0.72917	0.40407
contig02410	PIGL_MOUSERecName: Full=N-acetylglucosaminyl-phosphatidylinositol de-N-acetylase; AltName: Full=Phosphatidylinositol-glycan biosynthesis class L protein; Short=PIG-L	0.9253	0.048378	0.32109	0.926	0.47212	0.6678	0.52263	0.26075	0.74505	0.11672	-0.36057	0.48554	0.025349	0.99997	0.2467	0.76749	0.71483	0.023552	0.92704	0.018454	0.66206	0.27091	0.97517	0.021001
contig02413	---NA---	0.84756	0.31372	0.45109	0.94757	-0.22518	0.96275	0.37593	0.7052	0.42196	0.67193	-0.13757	0.90314	1.0482	0.51802	1.0367	0.24789	0.66034	0.1783	1.7549	0.0061609	1.4425	0.096387	1.4249	0.033232
contig02453	---NA---	0.46264	0.51924	0.14789	0.9938	-0.080985	0.98698	0.7873	0.12635	0.75587	0.17915	0.23092	0.73902	1.0662e-05	0.99997	0.1676	0.90259	1.4142	0.00078538	0.78284	0.092178	0.18968	0.8615	0.65392	0.19734
contig02456	---NA---	0.58282	0.14331	0.35144	0.80618	0.067116	0.9822	0.41777	0.27837	0.78262	0.039507	0.40021	0.33776	-0.034026	0.99997	0.19685	0.77802	0.89115	0.0016489	0.47682	0.14627	-0.13814	0.85434	0.27014	0.47632
contig02473	---NA---	0.044232	0.97732	-0.054843	0.99556	-0.12786	0.97356	-0.23821	0.76681	-0.05584	0.96508	-0.38128	0.54925	-0.084999	0.99997	0.35582	0.69891	0.9469	0.013603	-0.01754	0.98629	-0.44112	0.60168	0.16826	0.80177
contig02474	---NA---	0.71332	0.13901	0.43512	0.79623	0.24813	0.92203	0.29118	0.61137	1.051	0.020474	0.18814	0.74761	-0.093386	0.99997	0.48783	0.42433	1.3924	0.00018218	0.80459	0.037854	0.18444	0.8337	0.88905	0.033232
contig02482	---NA---	0.60946	0.35649	-0.094245	0.99454	0.7913	0.47894	1.213	0.030136	0.38443	0.58577	0.18248	0.81277	-0.63485	0.93835	-0.33322	0.7719	1.0047	0.021028	0.86438	0.072014	-0.15827	0.91198	0.44212	0.4873
contig02486	---NA---	0.37212	0.65548	-0.15558	0.9938	0.15249	0.96743	0.46126	0.47624	0.089222	0.94347	-0.095624	0.94055	-0.17728	0.99997	0.23789	0.86846	0.91339	0.019143	1.1993	0.013927	0.64424	0.46959	0.6877	0.24462
contig02487	SRRM1_CHICKRecName: Full=Serine/arginine repetitive matrix protein 1	0.66636	0.27773	-0.24462	0.98049	0.098089	0.98208	-0.23798	0.76358	0.32654	0.65631	-0.178	0.81242	-0.18764	0.99997	-0.39777	0.64178	1.0471	0.0067478	0.79394	0.088182	0.63212	0.39637	0.80297	0.10773
contig02506	---NA---	0.50495	0.80615	-0.20868	0.9938	0.00077323	0.99974	0.46671	0.78037	-0.18504	0.94069	-0.37452	0.8082	-0.36835	0.99997	0.67784	0.76749	1.6964	0.028393	0.85614	0.44897	0.83924	0.68892	1.1909	0.32387
contig02513	---NA---	0.37888	0.57676	0.043776	0.9957	0.17277	0.95528	0.20624	0.77798	0.71407	0.16335	0.36226	0.52167	-0.48599	0.94732	-0.18233	0.87312	1.0413	0.0035538	0.74492	0.077269	0.097932	0.93445	0.57122	0.21434
contig02523	SWET1_DANRERecName: Full=Sugar transporter SWEET1; AltName: Full=RAG1-activating protein 1; AltName: Full=Solute carrier family 50 member 1	0.57589	0.36826	0.060167	0.99512	-0.10446	0.98017	0.28972	0.68872	0.33747	0.63699	-0.17792	0.81113	0.31337	0.99997	0.34088	0.70856	1.0018	0.008547	0.53094	0.2933	-0.10047	0.93955	0.088629	0.9043
contig02525	CP2L1_PANARRecName: Full=Cytochrome P450 2L1; AltName: Full=CYPIIL1	0.18991	0.93284	-0.10067	0.99519	-0.62151	0.88014	-0.073487	0.96801	-0.34357	0.83205	-0.83512	0.43187	-0.85051	0.9972	0.56648	0.72873	1.3919	0.032004	0.88613	0.32297	0.12203	0.96048	0.70776	0.45252
contig02535	CATZ_BOVINRecName: Full=Cathepsin Z; Flags: Precursor	0.20491	0.95383	-1.0779	0.88259	0.19423	0.98809	0.79238	0.65207	0.18429	0.95252	-0.089714	0.96897	-0.087563	0.99997	0.47049	0.8843	2.1917	0.019396	1.2714	0.32065	0.30897	0.92204	1.913	0.1251
contig02537	NF70_DORPERecName: Full=70 kDa neurofilament protein; Short=NF70	0.74092	0.33278	0.67615	0.74036	0.053177	0.99502	0.51314	0.50702	0.18457	0.88258	0.21011	0.81784	0.71215	0.87366	1.1018	0.13448	1.5388	0.0017647	0.76899	0.18644	0.12885	0.93556	0.2554	0.73717
contig02538	NF60_DORPERecName: Full=60 kDa neurofilament protein; Short=NF60	0.91641	0.24064	0.54485	0.88685	-0.023451	0.99793	0.18849	0.87262	-0.48812	0.57539	-0.32137	0.71624	0.83324	0.79569	1.2223	0.11324	1.1972	0.013943	0.69908	0.28316	0.16423	0.91915	0.040548	0.96927
contig02539	---NA---	1.5021	0.21888	0.91187	0.86682	-0.76143	0.86788	-0.62325	0.66439	0.016838	0.99648	0.40291	0.85714	0.5856	0.99997	1.6297	0.29243	1.9706	0.010896	1.0189	0.32811	-0.2177	0.9495	-0.27936	0.86013
contig02549	CYB5_BOVINRecName: Full=Cytochrome b5	1.1259	0.074076	1.2361	0.073506	0.8408	0.39716	1.4698	0.0058731	1.2906	0.03763	0.40956	0.56733	0.47043	0.99997	0.6834	0.40031	1.624	0.00069257	1.2445	0.018481	0.72899	0.38574	0.88953	0.11564
contig02551	---NA---	1.253	0.0071654	1.2076	0.011729	0.94386	0.08863	1.2774	0.0026444	1.1011	0.023758	0.12347	0.86221	0.61011	0.73544	1.1801	0.01182	1.2733	0.00079555	1.4688	0.00048692	1.021	0.076179	1.2645	0.005271
contig02563	LPH_RABITRecName: Full=Lactase-phlorizin hydrolase; AltName: Full=Lactase-glycosylceramidase; Includes: RecName: Full=Lactase; Includes: RecName: Full=Phlorizin hydrolase; Flags: Precursor	0.2124	0.84194	0.40933	0.90977	0.15072	0.96743	-0.037365	0.97258	0.38183	0.58302	0.13197	0.87189	0.15445	0.99997	0.40873	0.63756	0.7833	0.038852	0.11537	0.88126	0.046627	0.97312	-0.13694	0.8453
contig02567	GELS2_LUMTERecName: Full=Gelsolin-like protein 2; AltName: Full=Actin-modulator; Short=EWAM-P2	1.1595	0.038711	0.8077	0.38575	0.47678	0.77428	0.91465	0.067801	0.5003	0.41557	-0.48609	0.43051	0.59382	0.8749	1.3106	0.012984	0.97978	0.010746	1.3079	0.0066095	0.61986	0.40769	0.99196	0.049209
contig02571	SBNO1_CHICKRecName: Full=Protein strawberry notch homolog 1	-1.1464	0.38675	-0.56364	0.96956	0.63159	0.92409	0.33345	0.89461	0.13804	0.95961	0.44511	0.74896	0.63454	0.99997	0.78947	0.81314	1.9272	0.046887	0.14542	0.91733	0.92444	0.75676	0.2797	0.88388
contig02577	ANTA_HYDVURecName: Full=Antistasin; Short=ATS; AltName: Full=Blood coagulation factor Xa/proclotting enzyme inhibitor; Flags: Precursor	1.231	0.22515	-1.5492	0.2192	-0.56637	0.89373	-1.0362	0.26664	0.97052	0.32849	0.41482	0.71969	0.64453	0.99997	1.2715	0.26054	2.455	0.00060832	1.0119	0.21918	-0.20193	0.92452	0.97787	0.26019
contig02578	ANTA_HYDVURecName: Full=Antistasin; Short=ATS; AltName: Full=Blood coagulation factor Xa/proclotting enzyme inhibitor; Flags: Precursor	1.0933	0.43447	-1.3017	0.65465	-0.7798	0.86941	-1.374	0.22273	1.2207	0.31528	0.76637	0.55695	0.76253	0.99997	1.126	0.46427	2.86	0.00094811	0.87142	0.43879	-0.78891	0.66632	0.68633	0.55958
contig02589	DCTN3_BOVINRecName: Full=Dynactin subunit 3	0.71447	0.49391	-0.21105	0.9938	0.24258	0.96349	0.61174	0.52266	0.58083	0.55795	0.038102	0.97809	-0.16741	0.99997	-0.14516	0.9572	1.4797	0.0090025	0.49138	0.57018	-0.36278	0.81113	0.41915	0.63146
contig02591	---NA---	0.48649	0.36066	0.18572	0.98241	0.39719	0.76798	0.83443	0.038421	0.63017	0.17854	-0.048357	0.94807	0.27179	0.99997	0.19897	0.83175	0.65228	0.035216	0.64285	0.096913	0.57299	0.34858	0.76902	0.064093
contig02605	TDT_CHICKRecName: Full=DNA nucleotidylexotransferase; AltName: Full=Terminal addition enzyme; AltName: Full=Terminal deoxynucleotidyltransferase; Short=Terminal transferase	0.71714	0.73098	0.77684	0.95105	-0.92286	0.93059	0.26223	0.92144	0.88114	0.54237	1.2718	0.385	0.70986	0.99997	0.29756	0.96123	2.2838	0.044894	-0.37722	0.81989	-1.1665	0.70692	0.021293	0.99325
contig02619	---NA---	-0.068988	0.96625	-0.10187	0.99454	-0.046439	0.99544	0.067174	0.95572	-0.38904	0.59789	-0.60832	0.34563	0.0010991	0.99997	0.16097	0.92973	0.90203	0.042132	0.79271	0.11218	0.88205	0.30915	0.43938	0.50646
contig02653	CHIA_RATRecName: Full=Acidic mammalian chitinase; Short=AMCase; Flags: Precursor	0.333	0.86373	0.48054	0.97445	-0.57971	0.92409	-0.038289	0.98488	-0.74283	0.52771	-1.1938	0.27277	1.0423	0.95877	2.1977	0.020664	-0.038523	0.95757	0.97492	0.28362	1.1466	0.39121	1.3686	0.1284
contig02657	---NA---	0.055854	0.98066	-0.084276	0.99519	-0.2477	0.96268	0.1511	0.9156	-0.04839	0.97876	-1.1975	0.17163	0.091437	0.99997	0.69109	0.54915	1.3144	0.01764	1.1905	0.081205	1.2105	0.24635	1.4061	0.056187
contig02665	DOLK_HUMANRecName: Full=Dolichol kinase; AltName: Full=Transmembrane protein 15	0.21166	0.84666	0.13202	0.9938	0.37453	0.87903	0.42781	0.52266	0.44701	0.50249	-0.095365	0.91413	0.0026146	0.99997	0.45495	0.59033	1.1414	0.0047713	0.55883	0.28706	-0.33915	0.72937	0.36425	0.53059
contig02667	---NA---	0.49508	0.27543	0.44062	0.69342	0.28141	0.86428	0.27894	0.5704	0.47806	0.25814	-0.17273	0.7362	0.17608	0.99997	0.5361	0.28943	0.9479	0.0017128	0.66486	0.052445	0.1846	0.80797	0.58395	0.11489
contig02669	SUR8_CULQURecName: Full=Leucine-rich repeat protein soc-2 homolog; AltName: Full=Protein Sur-8 homolog; AltName: Full=Protein soc-2 homolog	0.6267	0.73344	0.2885	0.9938	0.93977	0.90565	0.37105	0.91527	0.397	0.86347	1.075	0.39762	0.14347	0.99997	0.37061	0.9221	2.0265	0.023311	0.37052	0.79503	0.11361	0.97077	-0.76308	0.56422
contig02679	---NA---	-0.11103	0.9817	0.33959	0.9938	0.66074	0.95756	-0.92258	0.6591	1.2408	0.43574	0.92555	0.52605	0.61812	0.99997	1.2013	0.5538	2.4481	0.042949	0.93631	0.51719	0.13957	0.96727	0.76618	0.56135
contig02691	---NA---	0.2031	0.88429	-0.59798	0.82894	0.43854	0.87913	1.0425	0.090242	0.031506	0.98494	-0.55806	0.45314	-0.03449	0.99997	0.30049	0.82299	1.1205	0.01508	0.70367	0.24476	0.4714	0.65943	0.64052	0.31378
contig02709	KCC2D_BOVINRecName: Full=Calcium/calmodulin-dependent protein kinase type II subunit delta; Short=CaM kinase II subunit delta; Short=CaMK-II subunit delta	-0.15475	0.93948	-0.81096	0.78458	-0.56405	0.89826	-0.18465	0.89845	-0.089251	0.97374	-0.61264	0.67228	-0.2576	0.99997	-0.17733	0.95852	2.3598	0.0015067	1.0023	0.24175	0.23094	0.92207	0.17721	0.88554
contig02711	KCC2D_RATRecName: Full=Calcium/calmodulin-dependent protein kinase type II subunit delta; Short=CaM kinase II subunit delta; Short=CaMK-II subunit delta	-0.36021	0.74465	-0.3007	0.98049	0.53102	0.81553	0.67026	0.34857	0.40547	0.65275	-0.24455	0.78492	0.41505	0.99997	0.10751	0.96313	1.0525	0.023029	0.55837	0.3954	0.43863	0.69756	0.65735	0.30553
contig02713	UD2C1_RABITRecName: Full=UDP-glucuronosyltransferase 2C1; Short=UDPGT 2C1	0.52448	0.63965	-0.039303	0.99792	1.5511	0.06458	2.0379	0.0022606	0.64848	0.46534	0.092925	0.94046	1.4787	0.16023	1.5349	0.049704	1.0333	0.075773	0.66869	0.36708	0.94955	0.36607	1.6731	0.018507
contig02714	UD11_MOUSERecName: Full=UDP-glucuronosyltransferase 1-1; Short=UDPGT 1-1; Short=UGT1*1; Short=UGT1-01; Short=UGT1.1; AltName: Full=UDP-glucuronosyltransferase 1A1; AltName: Full=UGTBR1; Flags: Precursor	0.30245	0.89478	-0.31721	0.9938	0.99734	0.87913	1.185	0.5043	0.35556	0.85109	-0.10992	0.95028	0.50626	0.99997	0.8228	0.61574	2.576	0.0014884	1.3871	0.13455	0.73905	0.67075	1.2834	0.19786
contig02745	---NA---	0.0026458	0.99934	0.084352	0.99454	0.439	0.84857	1.082	0.048197	-0.35365	0.67024	-0.62471	0.35519	0.24846	0.99997	0.23245	0.86747	-0.13309	0.75689	0.45849	0.4551	0.15323	0.9123	0.44563	0.46517
contig02752	ADT2_MAIZERecName: Full=ADP,ATP carrier protein 2, mitochondrial; AltName: Full=ADP/ATP translocase 2; AltName: Full=Adenine nucleotide translocator 2; Short=ANT 2; Flags: Precursor	0.53259	0.61516	1.2769	0.21087	0.53529	0.85136	0.43021	0.65986	1.1019	0.15764	1.7516	0.022622	0.15842	0.99997	0.0062467	0.99903	1.1639	0.041423	0.29474	0.744	0.18982	0.91112	-0.39933	0.61993
contig02759	---NA---	0.70987	0.6675	-0.020927	0.99864	-0.61869	0.9127	-0.50951	0.742	0.65814	0.65437	-0.88055	0.47503	1.3052	0.79569	2.5885	0.01357	0.69004	0.40196	-0.24097	0.87273	0.31864	0.89188	0.75772	0.49465
contig02769	NUCB2_RATRecName: Full=Nucleobindin-2; AltName: Full=DNA-binding protein NEFA; AltName: Full=Prepronesfatin; Contains: RecName: Full=Nesfatin-1; Flags: Precursor	0.28691	0.92041	-0.36037	0.9938	-0.64902	0.92616	-0.48572	0.79783	0.21181	0.93852	-0.33963	0.90068	0.65924	0.99997	1.3093	0.50338	0.39762	0.68254	2.2341	0.037403	0.92152	0.69496	1.4644	0.27208
contig02777	---NA---	0.64493	0.22834	-0.028402	0.99719	0.1837	0.94809	0.088857	0.91818	0.51894	0.31988	0.11822	0.86671	-0.27148	0.99997	-0.084806	0.95816	1.0635	0.0026517	0.48634	0.27742	0.095941	0.93432	0.46963	0.30931
contig02779	---NA---	0.46574	0.25068	-0.069388	0.9938	0.29876	0.79698	0.10057	0.86823	0.22872	0.62824	-0.38275	0.33836	-0.14969	0.99997	0.26156	0.64559	0.54557	0.027858	0.33656	0.32467	0.073604	0.93231	0.47555	0.15577
contig02781	RT06_DROMERecName: Full=Probable 28S ribosomal protein S6, mitochondrial; Short=MRP-S6; Short=S6mt	0.33064	0.67295	-0.2151	0.98162	0.20072	0.94715	-0.016866	0.98739	-0.075601	0.94826	-0.27344	0.66594	-0.21496	0.99997	-0.0011634	0.99921	0.98307	0.0070886	0.15084	0.82127	-0.60863	0.38679	-0.082903	0.90574
contig02805	---NA---	0.27079	0.83314	-0.5646	0.86477	0.091753	0.98903	-0.10686	0.93163	0.15434	0.91126	-0.39109	0.62929	-0.47865	0.99997	0.9398	0.26054	1.0555	0.023606	0.4857	0.48312	-0.049302	0.97773	0.34172	0.64366
contig02831	---NA---	-0.19951	0.941	0.14671	0.99454	0.26573	0.98067	1.2792	0.41449	-0.075931	0.97589	0.080772	0.96478	0.53095	0.99997	-0.84031	0.7487	2.5536	0.016673	0.90483	0.408	0.29673	0.9279	0.089699	0.9647
contig02837	GPN3_DANRERecName: Full=GPN-loop GTPase 3; AltName: Full=ATP-binding domain 1 family member C	0.23631	0.79571	-0.20196	0.98482	0.12505	0.97013	0.46468	0.407	0.64775	0.2184	-0.146	0.83961	-0.054083	0.99997	-0.19646	0.86416	0.8805	0.012601	0.46052	0.34057	0.12521	0.91395	0.38393	0.44473
contig02849	---NA---	1.3316	0.3384	0.51369	0.98162	0.73892	0.89373	1.0084	0.45954	1.4163	0.25705	0.46583	0.76532	-0.20057	0.99997	-0.096212	0.98693	2.3407	0.0059021	1.0936	0.33491	-0.047218	0.98901	0.86607	0.46784
contig02851	---NA---	0.68304	0.16576	0.34819	0.89818	0.57808	0.47924	0.85064	0.03809	0.66012	0.16873	-0.11472	0.8638	0.18504	0.99997	0.53969	0.36479	1.2587	0.00050956	0.87027	0.026752	0.25231	0.7572	0.57944	0.17674
contig02909	CNOT3_MOUSERecName: Full=CCR4-NOT transcription complex subunit 3; AltName: Full=CCR4-associated factor 3	-0.012252	0.99487	-0.44508	0.92842	0.3315	0.93059	-0.022476	0.98715	0.17199	0.89139	0.3021	0.71374	-0.11107	0.99997	-0.74756	0.38217	1.3139	0.0050168	0.21101	0.79847	-0.30806	0.80036	0.2886	0.69238
contig02942	---NA---	-2.5006	0.026497	-4.2074	3.5357e-05	-2.8627	0.00823	-3.3177	0.0007289	-2.7511	0.011798	-2.9757	0.0077546	-4.4295	0.00013644	-5.7678	4.3657e-05	-4.1085	0.00088192	-5.4343	1.5697e-06	-3.5126	0.0015589	-3.4173	0.0011137
contig02946	RT27_MOUSERecName: Full=28S ribosomal protein S27, mitochondrial; Short=MRP-S27; Short=S27mt; AltName: Full=Mitochondrial ribosomal protein S27; Flags: Precursor	0.27574	0.78104	-0.024535	0.99792	1.0411	0.12016	1.4418	0.0034303	0.21104	0.82716	0.23324	0.74878	-0.26948	0.99997	-0.23626	0.87166	0.85642	0.028209	0.63574	0.21268	0.60334	0.50677	0.83386	0.15688
contig02971	---NA---	0.92697	0.5607	0.17768	0.99454	-0.72374	0.94054	-0.37232	0.8971	0.055621	0.98494	0.52023	0.72565	-0.26141	0.99997	-0.0053877	0.99921	1.9578	0.030741	1.8455	0.066958	-0.0071135	0.99818	0.38658	0.80805
contig02973	---NA---	0.73119	0.097078	0.28925	0.92842	0.16464	0.94761	0.66929	0.089201	0.76331	0.080214	-0.033198	0.96233	0.18138	0.99997	0.42269	0.46514	1.2656	0.0002161	0.83626	0.02165	0.20518	0.79432	0.62596	0.10741
contig02989	TYDP1_MOUSERecName: Full=Tyrosyl-DNA phosphodiesterase 1; Short=Tyr-DNA phosphodiesterase 1; AltName: Full=Protein expressed in male leptotene and zygotene spermatocytes 501; Short=MLZ-501	0.37444	0.6814	-0.20695	0.98981	0.095198	0.98512	0.33961	0.6626	0.63596	0.32288	0.33899	0.6361	-0.181	0.99997	-0.57988	0.47943	1.0961	0.0087315	0.59054	0.28501	0.45008	0.6303	0.58895	0.29911
contig02992	SETD9_HUMANRecName: Full=SET domain-containing protein 9	1.3168	0.2359	0.17872	0.99454	0.21277	0.97647	0.62626	0.61803	0.72066	0.55522	-0.70622	0.53889	0.10303	0.99997	0.57462	0.7424	2.0005	0.0050168	1.5396	0.06962	0.86841	0.55417	1.4059	0.12489
contig02999	BZW2_DANRERecName: Full=Basic leucine zipper and W2 domain-containing protein 2	0.1947	0.81355	-0.22059	0.97445	0.37126	0.79537	0.67543	0.10719	0.39722	0.43385	-0.45956	0.35403	-0.093603	0.99997	-0.03562	0.98715	0.92876	0.0040256	0.75541	0.047682	0.33031	0.64256	0.66636	0.1033
contig03001	---NA---	0.99277	0.06174	0.43332	0.86519	0.47376	0.74655	0.4709	0.4167	1.0319	0.0516	0.44561	0.44508	-0.091169	0.99997	0.2115	0.85371	0.88256	0.014644	0.63309	0.16521	0.37913	0.64698	0.79896	0.092463
contig03003	---NA---	0.85646	0.14595	0.51448	0.81468	0.096376	0.98262	0.31112	0.67215	0.36598	0.6109	-0.57093	0.3555	0.46737	0.99997	0.66825	0.35458	0.88133	0.021958	0.94319	0.046977	0.38384	0.67424	0.55711	0.29353
contig03013	MMS19_HUMANRecName: Full=MMS19 nucleotide excision repair protein homolog; Short=hMMS19; AltName: Full=MET18 homolog; AltName: Full=MMS19-like protein	0.12245	0.87083	-0.15205	0.98283	-0.098319	0.96987	0.12216	0.83773	-0.037871	0.96477	-0.23212	0.594	-0.12733	0.99997	-0.11456	0.90259	0.53912	0.034012	0.20229	0.62478	0.050675	0.95842	-0.04783	0.92829
contig03022	PSD10_HUMANRecName: Full=26S proteasome non-ATPase regulatory subunit 10; AltName: Full=26S proteasome regulatory subunit p28; AltName: Full=Gankyrin; AltName: Full=p28(GANK)	0.62486	0.18949	0.29212	0.93618	0.12175	0.96696	-0.048877	0.9526	0.83617	0.062033	0.21313	0.69513	0.030217	0.99997	-0.13469	0.90273	0.6474	0.031409	0.1872	0.71944	-0.11816	0.90315	0.019653	0.97782
contig03027	CDC16_HUMANRecName: Full=Cell division cycle protein 16 homolog; AltName: Full=Anaphase-promoting complex subunit 6; Short=APC6; AltName: Full=CDC16 homolog; Short=CDC16Hs; AltName: Full=Cyclosome subunit 6	0.14561	0.89404	-0.36962	0.91497	0.05345	0.99164	0.040767	0.96726	0.3865	0.52838	-0.16011	0.82086	-0.21617	0.99997	-0.64435	0.32282	0.82037	0.019744	-0.048129	0.95177	-0.39214	0.62212	0.22737	0.6886
contig03037	ERP60_SCHMARecName: Full=Probable protein disulfide-isomerase ER-60; AltName: Full=ERP60; Flags: Precursor	0.77972	0.4545	0.61414	0.90931	0.14692	0.9822	0.23513	0.86503	0.67659	0.48527	-0.43344	0.67151	0.27666	0.99997	1.1697	0.25076	1.1779	0.037706	0.55632	0.51972	0.24087	0.89218	0.70192	0.38644
contig03039	---NA---	0.91792	0.16965	0.5811	0.80618	0.018304	0.99794	0.043878	0.97093	0.45177	0.55466	-0.85755	0.21321	0.47255	0.99997	1.3272	0.030874	0.67733	0.10661	0.66007	0.24571	0.59025	0.50908	1.1398	0.046491
contig03040	RBM25_HUMANRecName: Full=RNA-binding protein 25; AltName: Full=Arg/Glu/Asp-rich protein of 120 kDa; Short=RED120; AltName: Full=Protein S164; AltName: Full=RNA-binding motif protein 25; AltName: Full=RNA-binding region-containing protein 7	-0.35026	0.82368	-0.497	0.95527	0.87528	0.72145	0.91243	0.35936	-0.24174	0.89042	1.1105	0.28352	1.4025	0.76045	-0.20004	0.94115	2.0625	0.0085971	0.81423	0.23883	-1.124	0.48541	-0.0056841	0.9966
contig03046	CP2R1_MOUSERecName: Full=Vitamin D 25-hydroxylase; AltName: Full=Cytochrome P450 2R1	0.76106	0.28836	0.23853	0.9877	0.65448	0.66559	1.0123	0.082809	1.0064	0.12384	0.52349	0.46156	-0.20681	0.99997	-0.047021	0.98805	1.4778	0.0017871	0.86026	0.11256	-0.024692	0.98925	0.43265	0.50131
contig03047	---NA---	0.41246	0.42026	0.10654	0.9938	0.50151	0.52219	0.79942	0.030059	0.69573	0.10808	0.29435	0.53973	0.031917	0.99997	0.099292	0.93393	0.93638	0.002342	0.60535	0.088619	0.23726	0.74573	0.29046	0.49119
contig03059	RORAB_DANRERecName: Full=Nuclear receptor ROR-alpha B; AltName: Full=Retinoid-related orphan receptor alpha 1; AltName: Full=Retinoid-related orphan receptor-alpha B	0.21341	0.76182	-0.50687	0.59284	0.17948	0.94109	0.19466	0.73972	0.39925	0.38201	0.13568	0.81239	-0.41363	0.94732	-0.1963	0.81122	0.65389	0.022434	0.18956	0.69476	-0.43271	0.46031	-0.058986	0.91859
contig03061	---NA---	1.026	0.079739	0.58634	0.7405	0.23027	0.94628	0.56803	0.35091	0.49643	0.44828	-0.049461	0.95862	-0.090977	0.99997	0.15386	0.92094	0.91576	0.020356	0.73952	0.1354	0.13383	0.91925	0.25491	0.68877
contig03065	ALF_SCHMARecName: Full=Fructose-bisphosphate aldolase	-0.31429	0.82432	-0.24912	0.99305	0.15342	0.97886	1.1368	0.10474	0.68007	0.41898	-0.038704	0.97546	0.040568	0.99997	-0.075971	0.98137	1.2631	0.01528	0.36998	0.66402	0.407	0.75928	0.9064	0.19531
contig03068	AQP5_MILTARecName: Full=Aquaporin-5; Short=AQP-5	-0.079075	0.97505	-0.39183	0.98162	-0.073431	0.99544	-0.18302	0.91923	-0.59706	0.60446	0.12363	0.93161	0.18835	0.99997	-0.063648	0.98851	1.3867	0.043944	0.25708	0.82686	0.064577	0.97814	0.28743	0.79095
contig03070	CP2DE_BOVINRecName: Full=Cytochrome P450 2D14; AltName: Full=CYPIID14	0.87836	0.25237	1.2654	0.12327	1.279	0.10706	1.6517	0.0054099	0.91963	0.19189	0.19585	0.84076	1.0856	0.37368	0.68122	0.46514	1.0793	0.022139	1.185	0.041704	0.75073	0.42647	0.75308	0.24138
contig03081	---NA---	0.55897	0.32132	-0.022328	0.99792	-0.1569	0.96087	-0.20999	0.76763	0.39586	0.48801	-0.24912	0.67912	-0.15782	0.99997	0.37912	0.61131	0.8148	0.016033	0.41705	0.37902	0.033477	0.97919	0.66562	0.13904
contig03087	---NA---	1.6938	0.049937	1.3596	0.27425	0.80062	0.71771	-0.78422	0.39651	1.6206	0.059551	1.1806	0.26059	0.28996	0.99997	0.67707	0.59215	1.1636	0.043216	0.40995	0.66985	0.86496	0.46965	0.93147	0.23974
contig03097	PPS_BACSURecName: Full=Putative phosphoenolpyruvate synthase; Short=Putative PEP synthase; AltName: Full=Pyruvate, water dikinase	0.18085	0.95585	0.083666	0.99719	-1.0339	0.79766	-0.44048	0.82408	0.78984	0.62894	1.459	0.34863	0.17405	0.99997	-0.53656	0.83858	1.6779	0.049816	0.082405	0.97277	0.23881	0.94476	-0.22224	0.89441
contig03100	---NA---	0.55024	0.31372	-0.24203	0.97046	0.13758	0.96522	0.38732	0.4803	0.059134	0.95747	0.0010008	0.99881	-0.22408	0.99997	-0.14145	0.9072	0.74313	0.023191	0.6341	0.12045	-0.20061	0.82431	0.053413	0.93704
contig03109	---NA---	0.71757	0.28341	0.07917	0.99454	0.15504	0.96995	0.31653	0.68851	0.49134	0.47363	0.49591	0.45435	-0.54588	0.98291	-0.13206	0.93923	1.0244	0.012878	0.21946	0.76056	-0.33888	0.74426	-0.021891	0.9826
contig03121	---NA---	0.57428	0.31806	0.21595	0.98162	0.23909	0.93429	0.35255	0.55999	0.76749	0.13834	0.34999	0.54334	-0.015385	0.99997	-0.15432	0.90254	1.1387	0.0021197	0.44007	0.35908	0.049954	0.96819	0.19347	0.73779
contig03123	---NA---	0.71251	0.20074	0.3005	0.95724	0.27037	0.92409	0.30254	0.64573	1.0248	0.04906	0.58057	0.30262	0.043884	0.99997	-0.15745	0.90259	1.0997	0.0031298	0.54248	0.24348	0.2953	0.74221	0.39967	0.42847
contig03125	---NA---	0.03144	0.9921	-0.63309	0.97207	0.81753	0.88946	0.50854	0.78766	1.363	0.34609	-0.32506	0.8201	0.5403	0.99997	0.30028	0.93393	2.0905	0.030344	1.4308	0.23794	0.62809	0.72925	0.67047	0.53349
contig03136	---NA---	0.43025	0.4382	0.28993	0.94095	0.20608	0.93493	0.36801	0.47411	0.098853	0.91432	0.10014	0.88148	0.11126	0.99997	0.28374	0.70537	0.70395	0.022202	0.71683	0.058739	0.39761	0.54069	0.58427	0.1577
contig03137	---NA---	0.45004	0.4653	0.052751	0.99519	0.12544	0.96995	0.438	0.42085	0.21639	0.7731	-0.13488	0.84656	0.021377	0.99997	0.33117	0.6742	0.58023	0.077908	0.81687	0.048777	0.57001	0.39113	0.91133	0.04133
contig03142	PP2A_DROMERecName: Full=Serine/threonine-protein phosphatase PP2A; AltName: Full=Protein microtubule star	0.31716	0.74632	-0.3657	0.94771	-0.54808	0.73654	-0.3605	0.63318	0.34005	0.67513	-0.31503	0.6659	-0.34824	0.99997	0.040011	0.98884	0.94665	0.020977	0.27572	0.68845	-0.24391	0.83008	0.64331	0.24997
contig03143	PP2AA_CHICKRecName: Full=Serine/threonine-protein phosphatase 2A catalytic subunit alpha isoform; Short=PP2A-alpha	0.76516	0.27908	-0.29456	0.97898	-0.085713	0.98903	-0.10774	0.92411	-0.0075904	0.9974	-0.24575	0.76435	-0.46262	0.99997	0.053789	0.98553	1.0024	0.020767	0.45991	0.47091	-0.019452	0.99104	0.63611	0.28602
contig03166	PCY2_HUMANRecName: Full=Ethanolamine-phosphate cytidylyltransferase; AltName: Full=CTP:phosphoethanolamine cytidylyltransferase; AltName: Full=Phosphorylethanolamine transferase	-0.0067757	0.99608	-0.24137	0.97602	0.20786	0.94481	0.69277	0.14339	0.071528	0.94935	-0.13157	0.85343	-0.046822	0.99997	-0.32808	0.68761	0.71778	0.034228	0.78237	0.063682	0.54576	0.42488	0.4201	0.38563
contig03170	KAPCA_CRIGRRecName: Full=cAMP-dependent protein kinase catalytic subunit alpha; Short=PKA C-alpha	0.30147	0.87401	-0.53393	0.9585	-0.092764	0.99239	0.083515	0.96221	0.62062	0.60145	-0.59652	0.58337	-0.077899	0.99997	0.55558	0.72873	1.2514	0.048344	0.63266	0.5125	0.13526	0.95514	1.0467	0.22973
contig03175	---NA---	0.41291	0.44814	-0.18489	0.98162	-0.20789	0.93429	0.15444	0.8223	0.072077	0.9398	-0.56496	0.24264	0.036001	0.99997	0.64396	0.22009	0.70409	0.019069	0.2098	0.67294	-0.17178	0.83792	0.21412	0.65242
contig03176	---NA---	1.9288	0.00036323	1.4944	0.009468	1.6085	0.0035132	1.9665	9.8868e-05	1.8071	0.0008025	1.3566	0.025095	0.88358	0.46499	1.2704	0.030874	2.1013	2.5408e-05	2.1063	3.1736e-05	0.90629	0.2426	1.2901	0.018774
contig03179	INO1B_XENLARecName: Full=Inositol-3-phosphate synthase 1-B; Short=IPS 1-B; AltName: Full=Myo-inositol 1-phosphate synthase B; Short=MI-1-P synthase B; Short=MIP synthase B	2.0092	0.015075	2.2175	0.0065305	2.4259	0.0068346	2.6926	0.00095577	1.1151	0.19935	1.6162	0.069687	0.42719	0.99997	2.1887	0.015389	3.3021	3.3762e-05	2.8866	0.00039187	0.94505	0.47756	1.8115	0.03611
contig03180	INO1B_XENLARecName: Full=Inositol-3-phosphate synthase 1-B; Short=IPS 1-B; AltName: Full=Myo-inositol 1-phosphate synthase B; Short=MI-1-P synthase B; Short=MIP synthase B	1.171	0.18762	1.3019	0.29931	0.93536	0.80354	1.2308	0.30272	0.71561	0.50563	1.3307	0.13317	1.8706	0.11425	1.5732	0.12368	2.8129	0.002342	2.4492	0.015534	1.6762	0.15077	1.6088	0.058306
contig03187	MDR3_RATRecName: Full=Phosphatidylcholine translocator ABCB4; AltName: Full=ATP-binding cassette sub-family B member 4; AltName: Full=Multidrug resistance protein 2; AltName: Full=Multidrug resistance protein 3; AltName: Full=P-glycoprotein 2; AltName: Full=P-glycoprotein 3	1.1605	0.16119	0.55589	0.92144	0.85377	0.59379	1.0043	0.18547	1.0459	0.19118	0.67204	0.43829	0.17532	0.99997	0.48327	0.71414	1.0913	0.039723	0.9945	0.14043	0.25001	0.87593	0.81604	0.26842
contig03188	MDR1A_MOUSERecName: Full=ATP-dependent translocase ABCB1; AltName: Full=ATP-binding cassette sub-family B member 1A; AltName: Full=MDR1A; AltName: Full=Multidrug resistance protein 1A; AltName: Full=Multidrug resistance protein 3; AltName: Full=P-glycoprotein 3; AltName: Full=Phospholipid transporter ABCB1	0.59717	0.46058	0.4146	0.94095	0.72649	0.57157	1.0371	0.077709	0.78614	0.23877	0.79797	0.26345	0.28045	0.99997	0.36195	0.7489	1.4284	0.0024521	0.70958	0.21789	0.36787	0.74392	0.63907	0.29425
contig03190	UNC22_CAEELRecName: Full=Twitchin; AltName: Full=Uncoordinated protein 22	0.47918	0.84685	-0.15476	0.99454	0.65146	0.93493	1.1723	0.53099	-0.43816	0.84491	-1.0387	0.52762	-0.52845	0.99997	0.2297	0.9572	2.7334	0.0074136	0.58272	0.69519	0.14815	0.96415	0.68437	0.61882
contig03196	---NA---	0.04192	0.98372	-0.72783	0.75743	0.40354	0.93429	0.53766	0.59541	-0.037851	0.98212	-0.4469	0.65139	-0.12569	0.99997	-0.25682	0.88126	1.0117	0.042073	0.7057	0.30071	0.32001	0.81656	-0.060932	0.95389
contig03202	GLNA_CHICKRecName: Full=Glutamine synthetase; Short=GS; AltName: Full=Glutamate decarboxylase; AltName: Full=Glutamate--ammonia ligase; AltName: Full=p42	0.29317	0.88445	0.12989	0.99454	0.62199	0.90627	0.88734	0.47279	0.93583	0.37573	-0.022665	0.9887	-0.092925	0.99997	0.69272	0.64628	1.8376	0.01411	1.3929	0.13524	0.36686	0.8464	1.3886	0.11602
contig03229	TXLNA_MOUSERecName: Full=Alpha-taxilin	0.13495	0.95579	0.033773	0.99792	-0.014751	0.99857	0.94277	0.33958	-0.15005	0.94217	-0.29696	0.81813	0.15331	0.99997	-0.040946	0.99221	1.4267	0.025862	0.72775	0.43243	1.007	0.43833	0.32977	0.76272
contig03239	KAD5_HUMANRecName: Full=Adenylate kinase isoenzyme 5; Short=AK 5; AltName: Full=ATP-AMP transphosphorylase 5	0.66997	0.48844	-0.39983	0.96332	-0.26066	0.95582	-0.0903	0.94784	0.11469	0.94577	-0.39222	0.67151	0.1777	0.99997	0.42035	0.7519	1.0778	0.035843	0.40307	0.63012	0.13506	0.9415	0.5445	0.46877
contig03248	---NA---	1.0786	0.30617	0.71216	0.92168	0.057685	0.99544	0.38262	0.80009	-0.2364	0.8923	0.7479	0.51052	0.61072	0.99997	-0.54166	0.82735	2.098	0.016158	1.3378	0.092121	0.69494	0.74547	0.4663	0.72053
contig03262	PUS7_BOVINRecName: Full=Pseudouridylate synthase 7 homolog	0.22859	0.81386	-0.3661	0.92629	-0.035286	0.99544	0.0921	0.92288	0.27919	0.70752	0.096903	0.90512	-0.24957	0.99997	-0.28352	0.76749	0.88048	0.015911	-0.023904	0.97979	-0.60657	0.39975	0.057755	0.9385
contig03271	PLST_BOVINRecName: Full=Plastin-3; AltName: Full=T-plastin	0.48587	0.53159	-0.17072	0.9938	0.19679	0.95763	0.17114	0.85903	0.2968	0.72358	-0.013314	0.98905	-0.28594	0.99997	-0.1379	0.93456	1.3072	0.0023908	0.31126	0.63349	-0.46188	0.60669	0.21467	0.75263
contig03272	PLSL_MOUSERecName: Full=Plastin-2; AltName: Full=65 kDa macrophage protein; AltName: Full=L-plastin; AltName: Full=Lymphocyte cytosolic protein 1; Short=LCP-1; AltName: Full=pp65	0.41732	0.55879	0.14145	0.9938	0.36934	0.86208	0.59959	0.26184	0.72137	0.18521	0.38484	0.52371	-0.40817	0.99997	-0.39655	0.62746	1.0914	0.0040256	0.51208	0.29827	0.066044	0.96196	0.36572	0.49261
contig03273	PLST_RATRecName: Full=Plastin-3; AltName: Full=T-plastin	0.44053	0.61105	-0.11834	0.9938	0.15611	0.96995	0.11468	0.91637	0.23139	0.82288	0.097986	0.91858	-0.2087	0.99997	-0.18451	0.90528	1.3285	0.002985	0.18944	0.80871	-0.53703	0.551	0.04756	0.95693
contig03281	SPT16_DROMERecName: Full=FACT complex subunit spt16; AltName: Full=Facilitates chromatin transcription complex subunit SPT16; AltName: Full=dSPT16	0.34078	0.70753	-0.36068	0.9461	-0.50861	0.76798	-0.8888	0.099407	0.020355	0.989	0.23822	0.74875	-0.43003	0.99997	-0.5365	0.50885	0.86212	0.030055	0.32401	0.61142	-0.14875	0.90982	0.3564	0.55432
contig03282	SPT16_DROMERecName: Full=FACT complex subunit spt16; AltName: Full=Facilitates chromatin transcription complex subunit SPT16; AltName: Full=dSPT16	0.92263	0.25406	0.69809	0.83525	0.2616	0.95819	-0.18509	0.90185	0.061924	0.97266	-0.23503	0.83057	0.085904	0.99997	0.66625	0.7077	0.3431	0.63552	1.6696	0.031005	1.8238	0.095665	1.4197	0.061203
contig03296	TC3A_CAEELRecName: Full=Transposable element Tc3 transposase	0.81271	0.26891	0.4479	0.92823	0.52805	0.80565	0.83757	0.19081	0.40164	0.64213	0.35126	0.66014	-0.0052517	0.99997	-0.55416	0.55881	1.2683	0.0062854	0.74998	0.1968	0.1546	0.91858	0.31117	0.66525
contig03298	---NA---	0.04123	0.97396	0.23425	0.96995	-0.033357	0.99544	0.55033	0.22586	0.64723	0.17104	-0.04619	0.9508	0.065391	0.99997	0.14721	0.89527	0.74985	0.017102	0.65399	0.091804	0.58621	0.33745	0.73298	0.077695
contig03299	---NA---	0.18703	0.87956	0.24154	0.98392	0.010768	0.99857	0.14359	0.88929	0.4207	0.56789	0.37485	0.59177	-0.16319	0.99997	0.032426	0.99143	0.90476	0.027045	0.35669	0.57873	-0.14022	0.91905	0.10727	0.89303
contig03303	---NA---	-0.085465	0.92885	-0.10284	0.9938	0.17507	0.94214	0.63501	0.093092	0.47101	0.27479	0.14458	0.79099	0.16812	0.99997	-0.28676	0.65747	0.66433	0.018435	0.30298	0.46182	0.13038	0.87733	0.12562	0.79927
contig03304	---NA---	0.25963	0.78366	-0.18678	0.99016	0.17945	0.95819	0.038752	0.97026	0.74069	0.18403	0.19827	0.78245	-0.29732	0.99997	-0.32944	0.72039	0.86161	0.020732	0.16826	0.80655	-0.16958	0.88038	0.18253	0.7756
contig03305	---NA---	0.44436	0.43744	0.13571	0.9938	0.18099	0.94689	-0.048024	0.95549	0.74107	0.11893	0.29349	0.5855	-0.047351	0.99997	-0.036198	0.98715	0.69583	0.027681	0.18787	0.73309	0.074804	0.94922	0.27177	0.57318
contig03306	---NA---	0.38704	0.59796	-0.21001	0.98456	0.33241	0.89092	0.046594	0.96272	0.591	0.29041	-0.12189	0.87638	-0.43162	0.99997	-0.22978	0.83257	0.77417	0.031393	0.38711	0.46705	0.091843	0.94385	0.47486	0.35054
contig03308	---NA---	0.099179	0.90229	-0.38644	0.7306	0.24923	0.87792	0.35338	0.38227	0.50249	0.19048	-0.059452	0.91858	-0.032746	0.99997	0.26598	0.64941	0.70893	0.0070794	0.62945	0.046751	0.41437	0.4159	0.96036	0.005271
contig03309	---NA---	0.3781	0.51411	-0.31965	0.91497	0.22166	0.93176	0.55386	0.20181	0.46907	0.32439	-0.033389	0.96334	-0.34232	0.99997	-0.26048	0.7317	0.92434	0.0036519	0.57521	0.1309	0.034914	0.97447	0.33941	0.43623
contig03310	---NA---	0.91292	0.1038	0.28647	0.96407	0.53655	0.68695	0.86309	0.082926	0.5667	0.33347	-0.0073276	0.99249	0.037188	0.99997	0.015814	0.99523	1.0409	0.0065931	0.96553	0.034928	0.30032	0.75344	0.67881	0.17674
contig03313	---NA---	0.23229	0.87866	-0.61243	0.8653	0.25748	0.95528	0.31915	0.76537	-0.016719	0.99385	-0.38354	0.67183	-0.44452	0.99997	0.20208	0.91806	1.507	0.0043487	0.2078	0.82894	-0.66527	0.53155	0.36762	0.64718
contig03314	---NA---	0.15193	0.86166	-0.34257	0.88685	0.057063	0.98966	0.52867	0.23143	0.45649	0.34044	-0.31391	0.53605	-0.09748	0.99997	0.22696	0.78337	0.83316	0.0073796	0.58468	0.12248	0.24379	0.75438	0.72973	0.069903
contig03326	SRSF4_MOUSERecName: Full=Serine/arginine-rich splicing factor 4; AltName: Full=Splicing factor, arginine/serine-rich 4	0.40818	0.84775	0.069916	0.99726	-0.57513	0.93429	-0.33978	0.88119	-0.61124	0.80966	-0.61487	0.68282	0.54652	0.99997	0.57976	0.81033	2.4979	0.022524	0.28753	0.86275	0.66346	0.75928	0.6981	0.59081
contig03328	RHO1_DROMERecName: Full=Ras-like GTP-binding protein Rho1; Flags: Precursor	0.23795	0.81089	-0.12195	0.9938	0.061378	0.9913	0.28586	0.69469	0.65223	0.2489	-0.34354	0.5891	0.20047	0.99997	0.2293	0.84228	1.0086	0.0083146	0.55248	0.27012	0.47244	0.55507	1.0858	0.029605
contig03329	RHO1_DROMERecName: Full=Ras-like GTP-binding protein Rho1; Flags: Precursor	0.515	0.63156	-0.36324	0.97536	-0.097818	0.98919	0.086355	0.95049	0.3354	0.76942	-0.4834	0.57689	-0.27178	0.99997	0.29595	0.85799	1.195	0.01988	0.62417	0.38923	0.2337	0.88031	0.96865	0.15944
contig03331	CACP_RATRecName: Full=Carnitine O-acetyltransferase; Short=Carnitine acetylase; AltName: Full=Carnitine acetyltransferase; Short=CAT; Short=CrAT	0.76635	0.46058	0.82961	0.75129	0.47851	0.9058	0.20828	0.88197	0.68838	0.46976	0.044838	0.97464	0.082986	0.99997	0.77194	0.50049	1.561	0.0072847	0.45955	0.61147	-0.24147	0.89048	0.29862	0.75647
contig03332	---NA---	0.67202	0.25227	0.33179	0.94114	0.53551	0.67098	0.56204	0.29791	0.7416	0.17232	-0.12156	0.876	0.40568	0.99997	0.9449	0.094915	1.0784	0.0041704	1.0818	0.016088	0.86418	0.19493	1.3044	0.0072331
contig03340	---NA---	0.053884	0.97976	-0.43763	0.9585	-0.03977	0.99793	1.0395	0.41327	0.46604	0.69073	2.5309	0.030935	-1.937	0.33629	-0.90944	0.56046	0.26276	0.72394	0.80408	0.25088	-0.55288	0.79063	-0.13282	0.92991
contig03361	PRS6B_MANSERecName: Full=26S proteasome regulatory subunit 6B; AltName: Full=ATPase MS73	0.51847	0.7663	-0.58405	0.9585	-0.13268	0.9897	0.089797	0.96294	0.74373	0.55381	0.030329	0.98645	-0.37617	0.99997	-0.30303	0.90836	1.8979	0.0085209	0.33884	0.79264	-0.45148	0.81636	0.49047	0.66425
contig03362	PRS6B_MANSERecName: Full=26S proteasome regulatory subunit 6B; AltName: Full=ATPase MS73	0.622	0.52415	0.016162	0.99861	0.24367	0.95839	0.60639	0.47582	0.90103	0.24022	0.97907	0.2305	-0.40688	0.99997	-0.63066	0.55558	1.5884	0.0031213	0.60452	0.40338	0.087267	0.96358	0.19944	0.82676
contig03363	PRS6B_MANSERecName: Full=26S proteasome regulatory subunit 6B; AltName: Full=ATPase MS73	0.93256	0.13616	0.31503	0.96357	0.1465	0.97013	0.31774	0.68817	0.77219	0.2097	0.043493	0.96487	-0.13634	0.99997	0.020594	0.99431	1.108	0.0080433	0.60647	0.26797	0.287	0.79401	0.47588	0.41351
contig03365	---NA---	0.99749	0.17136	0.30184	0.98056	0.78748	0.54781	0.84439	0.20972	0.64382	0.39236	0.14313	0.88925	0.56219	0.99997	1.235	0.09171	1.1309	0.016354	0.9587	0.0995	0.34812	0.77687	0.84826	0.1805
contig03369	EST2E_MOUSERecName: Full=Pyrethroid hydrolase Ces2e; AltName: Full=carboxylesterase 2E; Flags: Precursor	0.88182	0.60506	0.69943	0.9585	-0.69769	0.9074	-0.73703	0.63195	0.17605	0.94887	0.54678	0.72097	1.0227	0.99997	1.4306	0.36095	2.1281	0.011745	0.9747	0.41438	0.25771	0.92793	-0.15104	0.92998
contig03386	---NA---	0.47327	0.77286	-0.02488	0.99861	-4.2231	0.0029163	-4.5297	0.0025998	0.18859	0.9442	-0.5121	0.7373	-0.047856	0.99997	1.1751	0.40691	1.8185	0.045602	0.58211	0.56925	0.92291	0.50549	0.24253	0.83813
contig03394	---NA---	1.4094	0.02486	1.0372	0.25044	0.38757	0.8946	0.85444	0.15749	0.85438	0.1893	0.1841	0.83701	0.70708	0.85005	1.0241	0.15377	1.322	0.0036672	1.0311	0.053711	0.64824	0.46709	0.87003	0.13308
contig03397	---NA---	1.3625	0.24064	0.074805	0.99709	0.54063	0.92597	0.93745	0.4217	0.97586	0.39873	0.40953	0.76362	-0.33618	0.99997	-0.27023	0.92563	2.1464	0.0042283	1.0603	0.27099	-0.21555	0.93042	0.78217	0.45008
contig03428	---NA---	0.5164	0.24064	0.27562	0.92601	-0.006541	0.99857	0.048562	0.9465	0.63932	0.11767	0.20173	0.67912	-0.12546	0.99997	-0.1284	0.89496	0.68403	0.012878	0.51268	0.13397	0.0036034	0.997	0.42186	0.25968
contig03444	---NA---	-0.074303	0.97271	-0.082083	0.99516	-0.24115	0.96114	-0.26915	0.82124	0.27182	0.83358	0.057253	0.96334	0.28292	0.99997	-0.25577	0.90497	1.2414	0.017793	0.52016	0.5053	0.61801	0.64574	0.71766	0.3844
contig03454	TBA2_PATVURecName: Full=Tubulin alpha-2/alpha-4 chain	0.16331	0.91962	-0.22092	0.99367	-0.049699	0.99544	0.30228	0.76956	0.48398	0.58568	-0.3569	0.68213	-0.020743	0.99997	0.24213	0.88656	1.1703	0.01679	0.25775	0.7655	-0.61592	0.55416	0.22698	0.78943
contig03455	TBA_LYTPIRecName: Full=Tubulin alpha chain	0.79603	0.1855	0.10584	0.9938	0.38957	0.86208	0.30805	0.67505	0.67722	0.2413	0.36772	0.56872	-0.48815	0.99997	-0.46092	0.57119	0.95157	0.013721	0.3935	0.49	-0.20225	0.85492	0.060866	0.93853
contig03466	ENPL_BOVINRecName: Full=Endoplasmin; AltName: Full=94 kDa glucose-regulated protein; Short=GRP-94; AltName: Full=Heat shock protein 90 kDa beta member 1; Flags: Precursor	0.72071	0.38483	0.10583	0.99454	-0.27881	0.94657	-0.24823	0.8201	0.62451	0.4232	0.39086	0.64058	-0.14841	0.99997	0.227	0.89366	1.0579	0.026388	-0.1278	0.89614	-0.44484	0.70481	0.035608	0.97369
contig03469	MATN1_CHICKRecName: Full=Cartilage matrix protein; AltName: Full=Matrilin-1; Flags: Precursor	1.2355	0.16114	1.3965	0.2192	1.5499	0.10473	2.3805	0.00076291	0.9286	0.29167	0.36007	0.73149	0.20862	0.99997	0.79613	0.48491	1.2715	0.025266	1.7853	0.012571	-0.03013	0.99	0.82959	0.29108
contig03471	---NA---	1.4162	0.14331	1.7567	0.096932	2.1247	0.019918	3.0896	7.5634e-05	1.0159	0.30024	0.40112	0.72963	0.52817	0.99997	0.93908	0.44778	1.3469	0.031921	1.841	0.01931	0.47465	0.77243	1.061	0.21431
contig03484	CP4V2_HUMANRecName: Full=Cytochrome P450 4V2; AltName: Full=Docosahexaenoic acid omega-hydroxylase CYP4V2	-0.88663	0.51195	-2.1884	0.048001	-0.82693	0.80752	-0.66913	0.60196	-0.68538	0.60145	-1.4635	0.19709	-0.92998	0.98924	0.061065	0.99001	0.54365	0.43326	-0.0060377	0.99743	0.15055	0.95478	0.95264	0.33592
contig03492	CEBPG_MOUSERecName: Full=CCAAT/enhancer-binding protein gamma; Short=C/EBP gamma; AltName: Full=Granulocyte colony-stimulating factor promoter element 1-binding protein; Short=GPE1-BP; Short=GPE1-binding protein; AltName: Full=Immunoglobulin enhancer-binding protein 1; Short=IG/EBP-1	0.068318	0.96017	-0.17794	0.98971	-0.19995	0.94687	-0.15683	0.84955	0.1695	0.85037	0.17652	0.79632	-0.43202	0.99997	-0.18559	0.87449	1.1875	0.0017444	0.37067	0.47162	-0.095992	0.9382	0.52783	0.27242
contig03498	---NA---	0.45939	0.84567	0.34229	0.9938	-1.4747	0.75787	-0.98422	0.49135	2.8828	0.026555	1.0801	0.3775	0.41716	0.99997	0.38617	0.91097	1.3882	0.066158	0.41808	0.7819	0.30388	0.92199	0.0106	0.99547
contig03512	CSAD_RATRecName: Full=Cysteine sulfinic acid decarboxylase; AltName: Full=Aspartate 1-decarboxylase; AltName: Full=Cysteine-sulfinate decarboxylase; AltName: Full=Sulfinoalanine decarboxylase	1.0357	0.46649	0.44014	0.98482	-0.7746	0.89373	-0.26123	0.89225	0.23343	0.91975	0.8285	0.51775	-0.80046	0.99997	-1.069	0.49019	1.6019	0.036847	0.99359	0.35614	-0.9737	0.55671	-0.49824	0.68991
contig03515	---NA---	0.33076	0.50577	-0.0062617	0.99864	0.075303	0.97949	0.15425	0.78444	0.57648	0.14387	-0.1306	0.79966	-0.00014214	0.99997	0.30689	0.58937	0.73704	0.0063312	0.43232	0.20211	0.27923	0.64297	0.44774	0.20508
contig03516	---NA---	0.60626	0.25687	-0.13607	0.9938	0.55667	0.54436	0.49586	0.32036	0.55456	0.27102	-0.30316	0.58731	-0.074864	0.99997	0.13343	0.91514	0.96049	0.0049349	0.72587	0.074445	0.58057	0.37251	0.95304	0.029851
contig03517	---NA---	0.63176	0.18203	0.20953	0.97809	0.15598	0.95371	0.079196	0.91988	0.12653	0.87761	-0.34701	0.48325	0.24648	0.99997	0.34829	0.59716	0.13681	0.65178	0.2991	0.51079	0.48985	0.41488	0.79332	0.048942
contig03518	ORML3_DANRERecName: Full=ORM1-like protein 3	0.3222	0.69288	-0.26725	0.97048	0.38286	0.84704	0.47448	0.4217	-0.20542	0.81566	-0.35905	0.5566	-0.14144	0.99997	0.07856	0.9669	0.73802	0.040638	0.63554	0.17124	0.048455	0.97025	0.77647	0.10856
contig03532	---NA---	1.1504	0.22775	0.88783	0.73671	0.58918	0.87293	0.9888	0.2558	0.55224	0.6214	0.30448	0.79156	0.16932	0.99997	0.74552	0.5465	1.7766	0.0041235	0.86553	0.27802	-0.23952	0.89873	0.32839	0.74185
contig03533	---NA---	1.31	0.041215	1.2011	0.097678	0.43212	0.87167	0.61428	0.36218	0.29	0.76115	0.11463	0.90637	0.55422	0.99997	1.1165	0.10397	1.3557	0.0030904	0.95786	0.073931	0.053757	0.97221	0.38548	0.55531
contig03535	---NA---	0.61068	0.2361	0.11664	0.9938	0.21675	0.93429	0.41767	0.41763	0.61109	0.20113	0.47724	0.35052	-0.0011107	0.99997	-0.17621	0.86747	1.0397	0.0023361	0.43754	0.31397	-0.066292	0.95574	0.066584	0.91701
contig03542	TRM5_XENTRRecName: Full=tRNA (guanine(37)-N1)-methyltransferase; AltName: Full=M1G-methyltransferase; AltName: Full=tRNA	-0.1144	0.97381	-0.62341	0.98049	-0.45531	0.95026	-0.063693	0.98043	0.2662	0.91739	-0.093885	0.96346	0.50077	0.99997	-0.74451	0.80039	3.225	0.0041015	-0.44702	0.79869	0.059113	0.98871	0.6939	0.64731
contig03548	DX39B_MOUSERecName: Full=Spliceosome RNA helicase Ddx39b; AltName: Full=56 kDa U2AF65-associated protein; AltName: Full=DEAD box protein UAP56; AltName: Full=HLA-B-associated transcript 1 protein	0.72276	0.13038	-0.1926	0.98162	0.083022	0.98205	-0.28035	0.62642	0.1635	0.83396	-0.22581	0.68666	-0.30932	0.99997	-0.13195	0.91081	0.79565	0.01207	0.58901	0.13515	0.21159	0.80387	0.55419	0.19125
contig03553	---NA---	0.027736	0.98315	0.25474	0.95957	0.45737	0.69377	0.90385	0.028703	0.68364	0.1582	0.35609	0.50164	0.1634	0.99997	0.014395	0.99485	0.69544	0.02943	0.41011	0.35976	0.12351	0.90503	0.084204	0.89241
contig03556	---NA---	0.23808	0.61049	-0.03867	0.99454	0.15448	0.93429	0.53645	0.07745	0.53569	0.11767	0.10339	0.82228	-0.051053	0.99997	-0.050455	0.96588	0.50964	0.02515	0.23984	0.47735	-0.31206	0.50989	-0.051962	0.90887
contig03574	CBX1_HUMANRecName: Full=Chromobox protein homolog 1; AltName: Full=HP1Hsbeta; AltName: Full=Heterochromatin protein 1 homolog beta; Short=HP1 beta; AltName: Full=Heterochromatin protein p25; AltName: Full=M31; AltName: Full=Modifier 1 protein; AltName: Full=p25beta	0.45701	0.38054	0.18498	0.98162	0.056889	0.98933	0.0083246	0.99281	0.61754	0.17427	-0.15721	0.78781	0.15056	0.99997	0.068264	0.96472	0.653	0.02952	0.40193	0.33376	0.13559	0.88337	0.35526	0.40668
contig03596	RGS22_HUMANRecName: Full=Regulator of G-protein signaling 22; Short=RGS22	0.47806	0.48337	-0.31947	0.95105	0.28484	0.92363	0.58762	0.28064	0.59518	0.29431	-0.18365	0.79878	-0.2702	0.99997	-0.066677	0.97474	0.71843	0.047352	0.28564	0.6301	-0.014548	0.99194	0.43716	0.40049
contig03604	GID8_BOVINRecName: Full=Glucose-induced degradation protein 8 homolog	0.5884	0.57119	-0.14828	0.9938	0.074831	0.99239	-0.074852	0.95856	0.46619	0.6441	-0.35104	0.71367	-0.033217	0.99997	0.52525	0.66705	1.5184	0.0051942	0.5746	0.45194	0.49381	0.69863	1.1657	0.092745
contig03605	CATH_MOUSERecName: Full=Pro-cathepsin H; AltName: Full=Cathepsin B3; AltName: Full=Cathepsin BA; Contains: RecName: Full=Cathepsin H mini chain; Contains: RecName: Full=Cathepsin H; Contains: RecName: Full=Cathepsin H heavy chain; Contains: RecName: Full=Cathepsin H light chain; Flags: Precursor	0.773	0.34483	-0.077002	0.99516	-0.15036	0.97633	-0.16729	0.89041	0.90997	0.21036	-0.14384	0.89233	-0.29639	0.99997	0.039873	0.99041	1.171	0.01583	0.65406	0.32289	0.30403	0.819	0.80516	0.21728
contig03606	---NA---	0.50729	0.38674	-0.13391	0.9938	-0.073954	0.98652	-0.32047	0.59986	0.087437	0.93348	-0.47515	0.38143	-0.11109	0.99997	0.5195	0.42792	0.90732	0.0084647	0.28849	0.58556	-0.14052	0.89427	0.82995	0.064507
contig03619	---NA---	0.57576	0.33526	0.17829	0.98981	-0.10763	0.97747	0.060835	0.94885	0.43353	0.4649	-0.14385	0.84437	-0.0045065	0.99997	0.014138	0.99595	1.0203	0.0054001	0.33914	0.52805	-0.10436	0.93256	0.36307	0.48475
contig03620	---NA---	0.57483	0.30992	-0.025894	0.9977	0.22416	0.93493	0.33564	0.57943	0.32216	0.61331	-0.050735	0.95039	-0.22717	0.99997	-0.23702	0.8067	0.88332	0.010411	0.28432	0.59674	0.14145	0.89438	0.39996	0.40765
contig03637	ZN363_MOUSERecName: Full=RING finger and CHY zinc finger domain-containing protein 1; AltName: Full=Androgen receptor N-terminal-interacting protein; AltName: Full=CH-rich-interacting match with PLAG1; AltName: Full=E3 ubiquitin-protein ligase Pirh2; AltName: Full=RING-type E3 ubiquitin transferase RCHY1; AltName: Full=Zinc finger protein 363	0.33949	0.63279	0.30029	0.95012	0.15389	0.96245	0.68556	0.1446	0.25209	0.71984	0.41407	0.45215	0.33284	0.99997	0.022842	0.99177	0.96382	0.0059362	0.74603	0.075057	0.43361	0.54697	0.023177	0.97632
contig03638	---NA---	0.23643	0.87759	-0.46321	0.94583	-0.00054355	0.99974	0.41	0.67811	0.66896	0.42368	0.40018	0.66014	-0.2875	0.99997	-1.0252	0.26691	1.2575	0.014898	0.53736	0.47901	0.022505	0.99125	0.13131	0.89542
contig03639	---NA---	0.32148	0.65354	0.22517	0.97898	0.30607	0.89092	0.79996	0.069384	0.31833	0.60786	0.26174	0.65673	0.20008	0.99997	0.12952	0.92164	0.77219	0.020637	0.65616	0.11264	0.31975	0.69178	0.1394	0.81287
contig03652	ERD22_HUMANRecName: Full=ER lumen protein-retaining receptor 2; AltName: Full=ERD2-like protein 1; Short=ELP-1; AltName: Full=KDEL endoplasmic reticulum protein retention receptor 2; Short=KDEL receptor 2	-0.17563	0.85183	-0.042678	0.9957	0.10731	0.975	0.56921	0.23733	0.23615	0.73783	-0.2341	0.69285	-0.066683	0.99997	-0.077554	0.96249	0.64553	0.047973	0.4013	0.39107	0.13789	0.89392	0.15138	0.79351
contig03658	GDPP1_XENLARecName: Full=GDP-D-glucose phosphorylase 1	0.47304	0.67377	0.037682	0.99792	0.26077	0.9547	0.45389	0.62802	0.83103	0.29136	0.60041	0.47086	-0.25847	0.99997	-0.64539	0.54323	1.5355	0.0039671	0.21001	0.82781	-0.52878	0.65471	-0.079585	0.93955
contig03660	---NA---	0.49695	0.25665	0.18152	0.97898	-0.030007	0.99529	-0.099055	0.88168	0.48958	0.22882	0.19198	0.69023	-0.081202	0.99997	-0.13307	0.88818	0.79641	0.0045003	0.33765	0.3714	-0.12728	0.87396	0.20599	0.62492
contig03670	---NA---	0.72265	0.31372	0.5318	0.8556	-0.20384	0.95888	-0.24646	0.79278	0.54545	0.44373	0.22079	0.7917	0.076299	0.99997	0.41342	0.68761	1.1096	0.010887	0.19384	0.80728	-0.75508	0.37632	-0.23082	0.75069
contig03671	---NA---	0.00080474	0.99965	-0.51726	0.88138	0.25748	0.9468	0.38036	0.65114	0.17571	0.88689	-0.32488	0.68426	-0.70472	0.87321	0.34707	0.7695	0.94118	0.034156	0.93578	0.091802	0.388	0.73089	1.0633	0.07365
contig03690	DCTN4_MOUSERecName: Full=Dynactin subunit 4; AltName: Full=Dynactin subunit p62	0.23833	0.72534	-0.33379	0.88371	0.067144	0.98525	0.024452	0.9774	0.20131	0.75049	-0.0089629	0.9895	-0.20158	0.99997	-0.1332	0.90015	0.71141	0.015394	-0.024756	0.97302	0.19632	0.80421	0.54863	0.16185
contig03704	CDC42_MACFARecName: Full=Cell division control protein 42 homolog; Flags: Precursor	0.79397	0.12467	0.41337	0.86179	0.042371	0.99408	0.33812	0.57452	0.84744	0.095772	0.073046	0.9248	0.17053	0.99997	0.41274	0.56586	0.98975	0.0050168	0.52319	0.24363	0.494	0.4799	0.7535	0.093824
contig03705	CDC42_AEDAERecName: Full=Cdc42 homolog; Flags: Precursor	0.68363	0.6016	0.13279	0.99454	-0.099444	0.99146	0.43013	0.74387	1.0592	0.28512	0.12025	0.93621	0.008897	0.99997	0.27273	0.9101	1.6239	0.012423	0.65455	0.49519	0.24089	0.90884	1.0116	0.24966
contig03711	---NA---	0.91147	0.049937	0.80925	0.16296	0.31297	0.87217	-0.16825	0.8111	0.91587	0.04835	0.32396	0.53718	-0.034579	0.99997	0.067969	0.96683	0.9098	0.0052006	0.36679	0.41368	-0.096673	0.92794	0.11082	0.84748
contig03723	---NA---	0.235	0.90421	-0.16815	0.9938	-0.05371	0.99544	0.29913	0.83523	0.65956	0.54645	-0.17864	0.8962	-0.2621	0.99997	0.61204	0.6727	1.5634	0.012317	0.36864	0.7311	-0.21293	0.91835	0.77199	0.37751
contig03739	---NA---	0.27295	0.88761	-0.54179	0.95527	0.35449	0.94794	0.68058	0.535	0.88271	0.38082	0.42295	0.71381	-0.38207	0.99997	-0.99534	0.41385	1.4785	0.01953	0.43044	0.68444	-0.14095	0.95198	0.39875	0.69658
contig03742	RDHE2_MOUSERecName: Full=Epidermal retinol dehydrogenase 2; Short=EPHD-2; Short=RDH-E2; AltName: Full=Retinal short-chain dehydrogenase reductase 2; Short=retSDR2; AltName: Full=Short-chain dehydrogenase reductase 9; AltName: Full=Short-chain dehydrogenase/reductase family 16C member 5	0.33125	0.84632	0.23477	0.9938	0.17675	0.97904	0.50765	0.65986	0.29846	0.84818	-0.34783	0.76225	0.22259	0.99997	0.61083	0.66647	1.2149	0.043387	0.63844	0.4784	0.074235	0.9731	0.5957	0.50774
contig03744	RDHE2_MOUSERecName: Full=Epidermal retinol dehydrogenase 2; Short=EPHD-2; Short=RDH-E2; AltName: Full=Retinal short-chain dehydrogenase reductase 2; Short=retSDR2; AltName: Full=Short-chain dehydrogenase reductase 9; AltName: Full=Short-chain dehydrogenase/reductase family 16C member 5	0.059093	0.96986	-0.11681	0.9938	0.66319	0.51933	1.1274	0.019159	0.23048	0.79089	-0.3215	0.62185	0.55025	0.94292	0.96624	0.10602	1.0602	0.0064838	0.84396	0.070945	0.5678	0.46482	1.2143	0.016615
contig03753	MPCP_MOUSERecName: Full=Phosphate carrier protein, mitochondrial; AltName: Full=Phosphate transport protein; Short=PTP; AltName: Full=Solute carrier family 25 member 3; Flags: Precursor	0.0075561	0.99803	-0.50534	0.95867	0.30042	0.96522	0.16793	0.92848	-0.23722	0.89379	-0.4693	0.67819	0.29413	0.99997	0.88485	0.54967	1.5937	0.024666	1.0404	0.20526	0.30401	0.88869	1.0427	0.28478
contig03758	NCAH_DROMERecName: Full=Neurocalcin homolog; Short=DrosNCa	0.38211	0.91611	0.75004	0.97207	0.38871	0.9707	1.2082	0.49663	1.5167	0.36486	1.8874	0.29691	-0.14561	0.99997	1.1344	0.49907	2.1989	0.049512	0.60765	0.68786	1.1715	0.49439	1.1349	0.32646
contig03760	ARF1_XENLARecName: Full=ADP-ribosylation factor 1	0.44829	0.63689	-0.077905	0.99454	-0.085503	0.9892	0.12825	0.9121	0.52569	0.49339	-0.45681	0.54473	0.077972	0.99997	0.54923	0.5642	0.97262	0.030033	0.46937	0.48308	0.023917	0.99	0.66265	0.28614
contig03762	ARF1_XENLARecName: Full=ADP-ribosylation factor 1	0.22415	0.81782	-0.23712	0.98049	0.13375	0.96995	0.26452	0.71128	0.29171	0.68558	-0.18653	0.78998	-0.22325	0.99997	0.2195	0.84511	0.88403	0.01495	0.54843	0.25146	0.063534	0.9628	0.66896	0.16889
contig03769	---NA---	0.94615	0.43617	0.35756	0.99367	-0.073019	0.99544	0.4678	0.73295	1.3243	0.19048	0.59217	0.60733	-0.71476	0.99997	-0.91176	0.56897	2.1254	0.003064	0.77406	0.42444	-0.013688	0.9955	0.6109	0.59956
contig03770	---NA---	0.36421	0.54051	0.060611	0.99454	0.28887	0.88378	0.69719	0.090702	0.8359	0.065394	0.27563	0.59682	-0.080183	0.99997	0.23513	0.7732	1.3249	0.0002161	0.81979	0.029801	0.68919	0.2305	1.1284	0.0060409
contig03775	CALUA_SALSARecName: Full=Calumenin-A; Flags: Precursor	0.40207	0.80751	-0.21316	0.9938	0.45893	0.95756	0.57127	0.75478	-0.13407	0.94794	-0.56646	0.59246	-0.58257	0.99997	0.16369	0.96222	1.4232	0.040192	1.6417	0.034008	0.0056055	0.99814	0.25747	0.8388
contig03777	---NA---	0.85656	0.095476	0.38703	0.88498	0.44685	0.75189	0.79141	0.083119	0.91859	0.070373	0.39627	0.47771	0.33743	0.99997	0.34598	0.66085	1.394	0.00039095	0.93874	0.026423	0.78926	0.21429	0.87246	0.055759
contig03796	---NA---	0.77199	0.14754	0.16551	0.99367	0.67152	0.42134	1.2056	0.0057688	0.55534	0.30357	0.26232	0.67223	0.11606	0.99997	0.12656	0.92858	1.286	0.00088754	0.82161	0.054961	0.25531	0.78032	0.19187	0.74254
contig03807	---NA---	0.75565	0.39082	0.48934	0.93612	0.63301	0.77697	0.82719	0.2688	0.746	0.35122	-0.39973	0.65498	0.15104	0.99997	0.8343	0.38764	1.1559	0.022497	0.95225	0.13454	0.77684	0.45094	1.4823	0.027892
contig03808	---NA---	0.49044	0.66525	0.36513	0.98992	0.83652	0.88882	1.6241	0.12918	0.81876	0.3867	0.71136	0.5654	1.3667	0.80627	-0.17081	0.96568	2.4678	0.0062468	0.5616	0.5694	0.37635	0.86781	0.4118	0.6529
contig03815	---NA---	0.20512	0.82065	0.19485	0.98392	0.12215	0.96995	0.49757	0.32548	0.25856	0.70375	0.099266	0.89221	0.34685	0.99997	0.23244	0.80523	0.75622	0.02299	0.47466	0.29151	0.042664	0.97105	-0.16524	0.77257
contig03826	CLIC4_HUMANRecName: Full=Chloride intracellular channel protein 4; AltName: Full=Intracellular chloride ion channel protein p64H1	0.064134	0.98457	0.019616	0.99864	-0.71149	0.92118	-0.45946	0.82271	0.048051	0.98707	-0.4682	0.75408	-0.099209	0.99997	-0.37768	0.93574	1.879	0.019773	0.85434	0.46709	-0.2873	0.9438	-0.13107	0.95583
contig03832	---NA---	0.45233	0.44814	-0.18227	0.98605	-0.036234	0.99529	0.24236	0.70859	0.30226	0.6265	0.15007	0.8202	-0.26951	0.99997	-0.048324	0.98137	0.93982	0.0056721	0.0063812	0.99437	-0.33614	0.66233	-0.1174	0.84542
contig03833	---NA---	0.11994	0.91286	-0.041988	0.9957	0.34633	0.85522	0.37883	0.50984	0.40884	0.46964	0.09933	0.89404	0.091006	0.99997	-0.023214	0.99162	0.93999	0.0066794	0.46759	0.30758	0.2511	0.77483	0.28014	0.58806
contig03834	---NA---	0.27356	0.78404	-0.18285	0.99367	-0.064642	0.9913	0.11629	0.9089	0.27403	0.74685	0.36518	0.58304	-0.19965	0.99997	-0.17012	0.90664	0.97111	0.014063	0.08642	0.91648	-0.42448	0.6369	-0.35964	0.53949
contig03835	---NA---	0.2111	0.77868	-0.031482	0.99667	0.23041	0.92409	0.59797	0.14789	0.8443	0.054974	0.29252	0.55786	-0.063586	0.99997	-0.25164	0.73765	1.0072	0.0017957	0.35644	0.39915	-0.15157	0.86014	0.24369	0.59571
contig03836	HHAT_MOUSERecName: Full=Protein-cysteine N-palmitoyltransferase HHAT; AltName: Full=Hedgehog acyltransferase; AltName: Full=Skinny hedgehog protein	0.47347	0.5406	0.15643	0.9938	0.36708	0.89092	0.55033	0.38154	0.62661	0.31386	0.19172	0.80923	-0.1137	0.99997	-0.01642	0.99578	1.2555	0.0029565	0.44172	0.44599	0.024492	0.98871	0.39783	0.49816
contig03837	---NA---	-0.13907	0.92155	0.2094	0.99149	0.1153	0.98099	0.4086	0.59244	0.42985	0.57383	0.1515	0.86556	0.34313	0.99997	-0.14577	0.93425	1.135	0.0086631	0.55403	0.3457	0.29812	0.79366	0.51719	0.38996
contig03856	AKT1_ALTALRecName: Full=Acyl-CoA ligase AKT1; AltName: Full=AK-toxin biosynthesis protein 1	1.7012	0.038711	1.3291	0.25068	1.2391	0.28465	1.7787	0.01152	0.98601	0.24072	0.31049	0.77078	0.78431	0.94795	1.7113	0.032108	1.8091	0.0023888	1.3905	0.043223	0.59583	0.64256	1.0328	0.1691
contig03857	LUCI_PHOPYRecName: Full=Luciferin 4-monooxygenase; Short=Luciferase	3.4862	1.058e-05	3.6357	2.0052e-06	2.0432	0.018863	2.5909	0.00053729	2.3161	0.0052353	1.4187	0.13265	2.7703	0.00053891	4.0295	2.4773e-07	3.1149	2.2973e-05	3.4197	4.5264e-06	1.9554	0.044908	2.378	0.0032686
contig03858	LUCI_PHOPYRecName: Full=Luciferin 4-monooxygenase; Short=Luciferase	1.9591	0.05349	2.0859	0.052844	1.4321	0.34582	2.238	0.0097235	1.3966	0.1752	0.8393	0.45075	1.5985	0.35463	2.6882	0.0029178	2.3432	0.0016489	1.8403	0.029331	0.30203	0.88491	1.198	0.19555
contig03864	ABHD6_HUMANRecName: Full=Monoacylglycerol lipase ABHD6; AltName: Full=2-arachidonoylglycerol hydrolase; AltName: Full=Abhydrolase domain-containing protein 6	0.33208	0.84428	-0.53301	0.95082	0.78019	0.75809	1.0193	0.24653	0.33621	0.818	0.16289	0.9041	-0.12447	0.99997	0.26426	0.90525	1.2257	0.040191	0.34761	0.74136	0.15172	0.94415	0.68982	0.42367
contig03884	COEA1_CHICKRecName: Full=Collagen alpha-1(XIV) chain; AltName: Full=Undulin; Flags: Precursor	1.3121	0.036374	0.33544	0.95957	-0.32154	0.92539	-0.26073	0.77254	-0.19528	0.86077	-0.065763	0.94807	-0.11441	0.99997	0.47637	0.61378	1.131	0.0089108	0.78327	0.14349	-0.0951	0.95191	0.10661	0.89756
contig03898	CASC1_DANRERecName: Full=Protein CASC1; AltName: Full=Cancer susceptibility candidate gene 1 protein homolog	0.45151	0.54179	-0.090798	0.99454	0.31594	0.90936	0.64945	0.24263	0.554	0.35985	0.29716	0.66067	-0.22223	0.99997	-0.41272	0.63275	1.0922	0.0056825	0.52169	0.31651	0.13843	0.91288	0.31265	0.59561
contig03899	---NA---	0.50529	0.4674	0.028215	0.99792	0.60295	0.59304	0.5083	0.39824	0.58667	0.32187	0.34846	0.58669	-0.33495	0.99997	-0.56299	0.44549	0.8686	0.021577	0.51833	0.31454	0.053562	0.96901	0.1116	0.87709
contig03900	ADAT2_XENLARecName: Full=tRNA-specific adenosine deaminase 2; AltName: Full=Deaminase domain-containing protein 1; AltName: Full=tRNA-specific adenosine-34 deaminase subunit ADAT2	0.83818	0.16923	-0.11709	0.9938	0.50432	0.76096	0.48649	0.4522	0.458	0.49251	-0.090733	0.91881	-0.23619	0.99997	-0.19274	0.88893	1.0374	0.0092994	0.82795	0.088416	0.4483	0.60739	0.59112	0.27384
contig03925	NCBP1_HUMANRecName: Full=Nuclear cap-binding protein subunit 1; AltName: Full=80 kDa nuclear cap-binding protein; Short=CBP80; Short=NCBP 80 kDa subunit	0.066268	0.97732	-0.82023	0.77603	-0.8483	0.74704	-0.05305	0.97431	0.13285	0.94968	0.62613	0.50965	0.1623	0.99997	-0.97046	0.43998	1.5721	0.051599	1.4947	0.03726	-0.31873	0.86528	0.56253	0.56246
contig03944	PI16_MOUSERecName: Full=Peptidase inhibitor 16; Short=PI-16; AltName: Full=Cysteine-rich protease inhibitor; AltName: CD_antigen=CD364; Flags: Precursor	0.52852	0.86166	0.79191	0.96961	-1.2365	0.88946	-0.15585	0.96863	0.11451	0.97414	0.866	0.63929	1.3049	0.99997	-0.35961	0.94265	1.9007	0.043683	0.16971	0.9343	-0.055873	0.99	-0.44669	0.81053
contig03956	ATPA_HUMANRecName: Full=ATP synthase subunit alpha, mitochondrial; AltName: Full=ATP synthase F1 subunit alpha; Flags: Precursor	0.82847	0.2542	-0.047791	0.99654	0.45375	0.86248	0.90618	0.14336	0.50133	0.51541	0.1671	0.85837	0.14926	0.99997	0.8468	0.29905	0.82241	0.0613	0.92559	0.095221	0.82799	0.34258	1.3025	0.028915
contig03957	ATPA_PONABRecName: Full=ATP synthase subunit alpha, mitochondrial; AltName: Full=ATP synthase F1 subunit alpha; Flags: Precursor	0.6026	0.2361	0.14076	0.99367	0.073816	0.98463	0.53389	0.2438	0.17547	0.81766	-0.10415	0.87879	0.38422	0.99997	0.96932	0.03093	0.87534	0.0067615	0.83426	0.031005	0.10198	0.92362	0.68488	0.10001
contig03976	---NA---	0.6815	0.45932	0.55259	0.89808	0.44899	0.8946	0.96506	0.17305	0.75581	0.34097	0.37869	0.67367	0.40252	0.99997	0.22699	0.9015	1.7724	0.0013416	0.80353	0.22149	-0.078697	0.96627	0.80679	0.23964
contig03977	---NA---	1.0786	0.068561	1.0227	0.1684	0.60793	0.6491	0.70601	0.22173	0.96657	0.10808	0.35518	0.60152	0.60447	0.90789	0.50248	0.54592	0.93763	0.019073	0.82323	0.096162	0.50563	0.55223	0.54308	0.32774
contig03979	TBB_LYMSTRecName: Full=Tubulin beta chain; AltName: Full=Beta-tubulin	-0.33342	0.76011	-0.21931	0.99198	0.64944	0.68148	1.1395	0.049707	0.70681	0.30853	0.64169	0.37039	0.13478	0.99997	-0.51773	0.59335	0.23642	0.5948	0.13684	0.87859	0.046493	0.97804	0.20285	0.79519
contig03982	---NA---	0.68221	0.60974	-0.51912	0.95954	0.34159	0.95228	0.50051	0.69306	0.82273	0.44828	0.61936	0.57476	-0.66568	0.99997	-1.2391	0.29786	1.3491	0.037176	0.2613	0.83427	-0.81663	0.56111	-0.062146	0.96378
contig03997	SERA_BOVINRecName: Full=D-3-phosphoglycerate dehydrogenase; Short=3-PGDH; AltName: Full=2-oxoglutarate reductase; AltName: Full=Malate dehydrogenase	0.31075	0.87815	-0.49877	0.97046	0.12962	0.98919	0.59138	0.63607	0.53865	0.69234	0.11908	0.94038	-0.77002	0.99997	-0.90853	0.50749	1.8191	0.008394	0.41654	0.72022	-0.84388	0.56234	-0.073882	0.9582
contig03998	SERA_RATRecName: Full=D-3-phosphoglycerate dehydrogenase; Short=3-PGDH	0.094343	0.95416	-0.4706	0.90454	0.39248	0.89336	0.69069	0.28544	0.4206	0.60074	0.10382	0.91608	-0.85844	0.57947	-0.7332	0.36875	1.1066	0.011764	0.38643	0.56648	-0.37424	0.73149	0.049128	0.95656
contig04016	ACL6A_HUMANRecName: Full=Actin-like protein 6A; AltName: Full=53 kDa BRG1-associated factor A; AltName: Full=Actin-related protein Baf53a; AltName: Full=ArpNbeta; AltName: Full=BRG1-associated factor 53A; Short=BAF53A; AltName: Full=INO80 complex subunit K	0.23607	0.91664	-0.6269	0.94271	-0.02897	0.99794	-0.13465	0.94084	-0.20261	0.92143	0.52686	0.66498	-0.14972	0.99997	0.014346	0.99768	1.4426	0.033671	-0.44404	0.70182	0.066049	0.98244	0.039028	0.98332
contig04027	CDK2_RATRecName: Full=Cyclin-dependent kinase 2; AltName: Full=Cell division protein kinase 2	0.7538	0.3574	0.1255	0.99454	0.16477	0.97265	0.17161	0.88653	0.9482	0.18923	0.6905	0.37097	-0.23327	0.99997	-0.59794	0.553	1.0489	0.028273	0.37059	0.63458	0.043554	0.98129	0.091583	0.92691
contig04048	RDH11_HUMANRecName: Full=Retinol dehydrogenase 11; AltName: Full=Androgen-regulated short-chain dehydrogenase/reductase 1; AltName: Full=HCV core-binding protein HCBP12; AltName: Full=Prostate short-chain dehydrogenase/reductase 1; AltName: Full=Retinal reductase 1; Short=RalR1; AltName: Full=Short chain dehydrogenase/reductase family 7C member 1	0.10193	0.93971	-0.74404	0.48396	-0.059356	0.99135	-0.29521	0.68742	-0.054145	0.96561	-0.72847	0.23105	0.31786	0.99997	0.48133	0.54323	0.26038	0.48507	0.65664	0.17532	0.57531	0.45754	0.99265	0.049209
contig04051	COA4_MOUSERecName: Full=Cytochrome c oxidase assembly factor 4 homolog, mitochondrial; AltName: Full=Coiled-coil-helix-coiled-coil-helix domain-containing protein 8	0.51893	0.47591	0.19175	0.9925	0.37759	0.87913	1.0015	0.0511	0.40659	0.56329	0.4358	0.50211	0.1694	0.99997	-0.010241	0.99684	0.96622	0.014826	0.41073	0.48166	-0.064717	0.96539	0.11304	0.87961
contig04072	JMJD7_MOUSERecName: Full=Bifunctional peptidase and (3S)-lysyl hydroxylase Jmjd7; AltName: Full=JmjC domain-containing protein 7; AltName: Full=Jumonji domain-containing protein 7; AltName: Full=L-lysine (3S)-hydroxylase Jmjd7	0.25322	0.77403	-0.021992	0.99792	-0.015546	0.99794	0.54417	0.30294	0.83953	0.11321	0.21583	0.74003	0.14688	0.99997	0.088488	0.95881	1.1166	0.0027664	0.42388	0.3954	0.082476	0.9495	0.38735	0.44352
contig04074	---NA---	0.61234	0.10661	-0.038218	0.9952	0.19294	0.92425	0.094584	0.87884	0.53704	0.15811	-0.037933	0.95002	-0.11654	0.99997	0.073874	0.94743	0.79037	0.0030491	0.41628	0.20211	0.28811	0.60739	0.59292	0.076618
contig04075	---NA---	0.29656	0.68628	-0.31035	0.94095	0.32938	0.87021	0.67915	0.13539	0.36582	0.52275	-0.10962	0.8781	-0.28595	0.99997	-0.18285	0.86631	0.97852	0.0043469	0.58695	0.15951	0.26689	0.75227	0.464	0.30954
contig04076	RTBS_DROMERecName: Full=Probable RNA-directed DNA polymerase from transposon BS; AltName: Full=Reverse transcriptase	0.54372	0.60945	0.53234	0.92414	0.52512	0.86551	0.7739	0.32891	0.57771	0.52275	0.17428	0.87718	-0.013329	0.99997	0.27904	0.8729	1.0208	0.046887	0.79871	0.24498	0.42366	0.75038	0.83101	0.241
contig04079	---NA---	0.36695	0.84744	0.088817	0.9957	1.2253	0.48546	1.8285	0.036724	0.63951	0.66801	0.15526	0.91913	0.097812	0.99997	-0.098442	0.98183	-0.59493	0.4207	-0.049575	0.97665	0.13485	0.95813	-0.38965	0.72828
contig04105	---NA---	0.75112	0.32893	0.26043	0.98482	0.077127	0.99089	0.15591	0.89172	0.65278	0.36994	-0.21987	0.80932	-0.11146	0.99997	-0.21367	0.89684	0.95102	0.036186	1.2202	0.030156	0.62462	0.51066	1.1121	0.067165
contig04116	PCID2_DANRERecName: Full=PCI domain-containing protein 2; AltName: Full=CSN12-like protein	0.12622	0.91867	-0.22705	0.98162	0.024519	0.99645	-0.009432	0.99298	0.18713	0.84262	0.17669	0.81242	-0.1493	0.99997	-0.45082	0.56924	1.0527	0.006269	0.50692	0.32185	0.079584	0.95478	0.27752	0.63752
contig04150	---NA---	0.46557	0.51902	0.31969	0.9585	0.31733	0.90627	0.79797	0.12246	0.82657	0.14688	0.43106	0.48503	0.069742	0.99997	-0.2649	0.80431	0.95429	0.012312	0.62707	0.19859	0.20432	0.85164	0.32781	0.5659
contig04160	---NA---	1.7915	0.28744	1.3215	0.83264	0.57974	0.95528	0.32008	0.9223	0.70501	0.7511	-0.1022	0.96741	0.4213	0.99997	2.5707	0.11906	2.0765	0.040888	1.4392	0.30039	1.1738	0.60701	1.7264	0.21242
contig04165	SMYD3_HUMANRecName: Full=Histone-lysine N-methyltransferase SMYD3; AltName: Full=SET and MYND domain-containing protein 3; AltName: Full=Zinc finger MYND domain-containing protein 1	0.37359	0.7049	0.13014	0.9938	0.11674	0.98141	0.31363	0.71824	0.98068	0.13509	0.45687	0.52972	0.13859	0.99997	-0.36132	0.74613	1.3861	0.0027339	0.26743	0.72139	-0.077082	0.96264	0.21897	0.76944
contig04175	---NA---	0.62414	0.18167	0.61746	0.42151	0.060526	0.98861	0.37067	0.45183	0.10751	0.89894	-0.17876	0.74693	0.43417	0.94492	1.0709	0.0085712	0.65184	0.028263	0.53048	0.16153	0.27518	0.70803	0.13643	0.79407
contig04177	---NA---	0.071574	0.96415	-0.19855	0.99095	0.009041	0.99857	0.32468	0.66923	0.51964	0.42368	0.26867	0.71097	-0.23239	0.99997	-0.63884	0.40151	0.91562	0.021603	0.46326	0.41602	0.40324	0.66632	0.49747	0.37733
contig04178	---NA---	0.39829	0.77009	-0.19805	0.9938	-0.005968	0.99933	0.17064	0.90275	0.52348	0.60903	1.0329	0.24331	-0.41826	0.99997	-1.145	0.23956	1.085	0.045188	0.054466	0.96672	0.03326	0.98879	0.13286	0.9016
contig04180	---NA---	0.38758	0.76588	-0.22044	0.9938	0.41988	0.92193	0.36602	0.73338	0.19324	0.89704	-0.77133	0.36316	-0.39278	0.99997	0.2209	0.91124	1.064	0.041594	1.2453	0.055638	0.80601	0.45449	1.241	0.07684
contig04186	---NA---	0.21412	0.95721	0.80311	0.9585	-0.84454	0.93599	-0.77331	0.78099	0.64322	0.76131	1.9415	0.21784	0.4857	0.99997	0.13237	0.98549	2.1544	0.028182	0.27957	0.86937	0.55629	0.85492	0.54061	0.73775
contig04198	AOFB_PONABRecName: Full=Amine oxidase	-1.3456	0.1779	-1.8123	0.087076	-0.80159	0.77494	-0.55608	0.63918	-0.93581	0.35527	-1.1966	0.2469	-1.5045	0.49637	-1.5882	0.12343	-1.183	0.060352	-1.5963	0.04353	-0.94775	0.47104	-0.41492	0.68762
contig04200	AOFB_HUMANRecName: Full=Amine oxidase	-1.5656	0.051444	-2.6598	0.00016706	-0.83945	0.70159	-0.45227	0.69799	-1.6569	0.064762	-1.4626	0.23069	-1.3005	0.32406	-2.4215	0.0028015	-1.8312	0.0018926	-2.9451	1.8223e-05	-1.4207	0.15185	-1.0162	0.15984
contig04201	COG3_MOUSERecName: Full=Conserved oligomeric Golgi complex subunit 3; Short=COG complex subunit 3; AltName: Full=Component of oligomeric Golgi complex 3	-0.058339	0.98305	0.16406	0.99454	0.3111	0.96522	0.7315	0.58522	-0.53102	0.69475	0.10987	0.94447	-0.719	0.99997	-0.26885	0.91683	1.9121	0.012219	1.0215	0.25202	-0.51276	0.76616	1.1809	0.19447
contig04208	---NA---	-0.3216	0.81769	-0.66617	0.88395	0.56756	0.93176	0.30384	0.86268	-0.89923	0.33347	-0.79733	0.51345	-0.45299	0.99997	0.7033	0.76632	1.8001	0.02635	0.66598	0.48166	-0.14442	0.95825	0.1272	0.93244
contig04222	PGAM_DICDIRecName: Full=Probable phosphoglycerate mutase; AltName: Full=BPG-dependent PGAM; Short=dPGM	0.46068	0.43082	0.42917	0.8207	0.26951	0.90936	0.59129	0.20389	0.53873	0.28282	-0.16073	0.80165	0.56226	0.79569	0.92878	0.055559	0.80023	0.014653	0.78046	0.051769	0.58319	0.3656	0.5103	0.25051
contig04228	AIFM3_MOUSERecName: Full=Apoptosis-inducing factor 3; AltName: Full=Apoptosis-inducing factor-like protein	0.73827	0.58897	0.30393	0.99367	0.1149	0.99087	0.065351	0.97299	0.97802	0.36379	0.4905	0.6854	0.0073281	0.99997	-0.6328	0.7	1.3903	0.038638	0.3544	0.76877	-0.5357	0.75865	0.022489	0.98791
contig04231	4CL1_DICDIRecName: Full=Probable 4-coumarate--CoA ligase 1; Short=4CL 1; AltName: Full=4-coumaroyl-CoA synthase 1	0.8476	0.36819	0.34619	0.98162	-0.29069	0.95104	-0.37718	0.7365	0.3102	0.81561	-0.556	0.54501	0.18074	0.99997	1.2537	0.17679	1.0635	0.049965	0.43641	0.62166	-0.20516	0.90912	0.35075	0.69326
contig04233	4CLL7_ARATHRecName: Full=4-coumarate--CoA ligase-like 7; AltName: Full=4-coumarate--CoA ligase isoform 6; Short=At4CL6	0.76491	0.25833	0.74093	0.58303	-0.44585	0.84298	-0.52028	0.44829	0.46263	0.52248	-0.26888	0.72496	0.58808	0.94795	1.2462	0.037268	0.67065	0.099047	0.25657	0.72022	0.11193	0.93955	0.45147	0.45153
contig04267	GPX1_SCHMARecName: Full=Glutathione peroxidase; Short=GPX	0.52712	0.75648	-0.39998	0.98482	0.0067428	0.99945	0.52856	0.69847	0.35594	0.83922	-0.67919	0.56366	-0.18414	0.99997	0.57423	0.7487	1.5542	0.025756	0.87646	0.37149	0.5826	0.74392	0.90082	0.36029
contig04276	---NA---	0.69002	0.14331	0.083201	0.9938	0.058883	0.98919	0.15765	0.82406	0.24326	0.69578	-0.24092	0.65953	0.25076	0.99997	0.18022	0.85531	0.80397	0.010154	0.45045	0.27715	0.34829	0.61506	0.5663	0.17277
contig04279	NLTP_BOVINRecName: Full=Non-specific lipid-transfer protein; Short=NSL-TP; AltName: Full=Propanoyl-CoA C-acyltransferase; AltName: Full=SCP-chi; AltName: Full=SCPX; AltName: Full=Sterol carrier protein 2; Short=SCP-2; AltName: Full=Sterol carrier protein X; Short=SCP-X	0.4255	0.76145	-0.030083	0.99792	0.69248	0.79024	1.4514	0.0511	0.93895	0.28512	0.41124	0.68638	0.24094	0.99997	0.68262	0.57552	1.2846	0.024082	1.0857	0.12875	0.85575	0.4661	1.4376	0.058871
contig04315	VP33_APLCARecName: Full=Vesicle-associated membrane protein/synaptobrevin-binding protein; AltName: Full=VAP-33	-0.11497	0.97719	0.12624	0.9957	0.65282	0.94481	0.50676	0.82064	-0.027163	0.99573	0.65252	0.71555	-0.18663	0.99997	-0.55931	0.83097	1.775	0.041779	0.9088	0.48504	-0.79928	0.7126	-0.47451	0.7472
contig04316	---NA---	0.34909	0.78524	0.024777	0.99792	0.042668	0.99551	0.12892	0.92208	0.48882	0.59783	-0.24905	0.80138	0.51734	0.99997	0.40157	0.75764	0.99522	0.045084	1.04	0.095284	0.8219	0.40769	1.0497	0.1167
contig04333	beta-hydroxysteroid epimerase; Short=3-alpha-	-0.064901	0.97775	-2.0481	0.012299	-1.5018	0.13651	-1.1235	0.16327	-0.25619	0.86807	-0.62687	0.51067	0.0090626	0.99997	0.39953	0.80844	0.30736	0.5926	-0.22527	0.83905	-0.021942	0.99195	0.39699	0.6666
contig04342	---NA---	0.19165	0.93052	-0.089668	0.99556	-0.98292	0.64554	-1.7526	0.033675	-0.030207	0.98987	-0.66607	0.53425	-0.21383	0.99997	0.50503	0.76503	0.20028	0.7608	0.17828	0.89194	-0.038477	0.98879	0.17192	0.88912
contig04362	HEX_VIBVLRecName: Full=Beta-hexosaminidase; AltName: Full=Beta-N-acetylhexosaminidase; AltName: Full=Chitobiase; AltName: Full=N-acetyl-beta-glucosaminidase	1.0643	0.3891	0.46602	0.98049	0.53506	0.92578	0.93308	0.41719	0.80721	0.50918	0.67653	0.57361	0.51077	0.99997	0.93218	0.52563	2.1948	0.003379	0.5582	0.62737	-0.52473	0.77856	0.3625	0.76494
contig04371	---NA---	0.24639	0.70239	0.13066	0.99367	0.14231	0.9569	0.24361	0.64812	0.66795	0.11782	-0.050399	0.94027	0.0018078	0.99997	-0.08404	0.94722	0.61411	0.0302	0.39712	0.30534	0.42802	0.46539	0.64769	0.086667
contig04384	ZN112_HUMANRecName: Full=Zinc finger protein 112; Short=Zfp-112; AltName: Full=Zinc finger protein 228	0.37193	0.75927	0.34351	0.97811	-0.2467	0.95697	0.39111	0.6838	0.73229	0.35021	-0.10431	0.92694	0.65691	0.9873	-0.16312	0.93752	1.0061	0.040576	0.90912	0.14681	0.74975	0.4604	0.69159	0.31626
contig04390	---NA---	-0.18006	0.95077	-0.046108	0.99792	0.22056	0.97983	0.92584	0.47678	0.52956	0.75505	-0.071542	0.97012	0.079004	0.99997	-0.3933	0.88324	1.5382	0.045563	-0.16903	0.9178	0.067813	0.98231	0.15166	0.92474
contig04400	---NA---	0.79464	0.30076	0.084251	0.99454	-1.2089	0.13571	-0.96364	0.13182	0.3357	0.73365	-0.45385	0.56039	0.89007	0.63671	1.3705	0.042097	0.68796	0.12879	1.1035	0.053503	0.56226	0.57913	0.77438	0.21769
contig04406	CTRA_BOVINRecName: Full=Chymotrypsinogen A; Contains: RecName: Full=Chymotrypsin A chain A; Contains: RecName: Full=Chymotrypsin A chain B; Contains: RecName: Full=Chymotrypsin A chain C; Flags: Precursor	0.45759	0.49129	-0.25366	0.97445	0.40615	0.81639	-0.087513	0.92558	0.22445	0.77912	-0.39344	0.50186	-0.40275	0.99997	0.12585	0.93175	0.75005	0.033348	0.43654	0.38409	0.030408	0.98254	0.39392	0.44045
contig04411	NUPR2_HUMANRecName: Full=Nuclear protein 2; AltName: Full=Nuclear transcriptional regulator 1-like protein; AltName: Full=Nuclear transcriptional regulator protein 2	0.16475	0.94994	-0.35597	0.98971	0.13537	0.98919	0.085515	0.96465	0.1845	0.93281	-0.68422	0.56063	0.075919	0.99997	1.1064	0.41244	2.1035	0.004081	1.5788	0.067827	0.10439	0.96691	1.4527	0.11964
contig04415	---NA---	0.44346	0.44649	-0.0083308	0.99864	0.16396	0.95493	0.30584	0.59765	-0.0076672	0.99611	-0.22119	0.70289	-0.19529	0.99997	-0.19251	0.84886	0.6686	0.035667	0.61347	0.12631	-0.30765	0.69207	-0.075041	0.90546
contig04426	---NA---	0.46871	0.53909	-0.0086654	0.99864	0.19202	0.95763	0.036368	0.97431	0.41408	0.55311	-0.51039	0.42474	0.23237	0.99997	0.31769	0.75403	0.32189	0.40151	0.72575	0.14349	0.74526	0.33126	1.0433	0.046431
contig04434	---NA---	-0.79805	0.83252	0.11617	0.99719	0.58986	0.96491	-0.18809	0.95999	-0.75881	0.81976	-0.48448	0.86785	0.38242	0.99997	0.42695	0.94239	-2.6703	0.048522	-1.9734	0.28494	-0.70377	0.85938	-1.4635	0.46077
contig04447	---NA---	-0.027007	0.99454	0.94287	0.94625	-2.5777	0.40614	-1.753	0.35437	0.69068	0.73271	-0.31989	0.91226	-0.53994	0.99997	-0.18543	0.97131	0.56505	0.65865	2.7357	0.027885	-0.18006	0.96909	0.68136	0.65241
contig04450	GR_BACSURecName: Full=Glyoxal reductase; Short=GR; AltName: Full=Methylglyoxal reductase	1.8391	0.0049324	1.7329	0.009468	1.2859	0.10829	1.8409	0.0020469	1.3437	0.05597	0.78021	0.30566	1.1132	0.35463	1.7924	0.0048188	1.9126	0.00044574	1.7838	0.0030156	0.65939	0.50393	1.2353	0.051731
contig04451	---NA---	1.2081	0.037414	1.3657	0.015406	0.95654	0.19559	1.7032	0.00050897	1.3912	0.011399	1.159	0.054376	0.84929	0.46232	0.93469	0.14945	1.6034	0.00039777	1.5004	0.002468	0.64412	0.40702	0.77498	0.14107
contig04452	---NA---	1.7774	0.0011216	1.9115	0.00028882	1.3153	0.028314	1.7616	0.00053729	1.258	0.036042	0.90391	0.16489	1.2604	0.072966	1.6847	0.0016807	1.7827	0.00020975	1.8299	0.00032116	1.054	0.15928	1.1518	0.034318
contig04474	---NA---	0.41776	0.7529	-0.40341	0.97048	0.21021	0.96985	0.53594	0.58358	0.58003	0.55038	-0.26463	0.80785	-0.38928	0.99997	0.20718	0.92488	1.5515	0.0060848	0.85252	0.23743	0.45972	0.74162	1.0722	0.14463
contig04475	---NA---	0.54048	0.49336	-0.1534	0.9938	0.21744	0.95342	0.22289	0.81405	0.49439	0.48851	-0.3747	0.60117	-0.25875	0.99997	0.22144	0.87662	1.089	0.010665	0.68247	0.21263	0.61704	0.47612	1.1837	0.033825
contig04481	---NA---	0.16702	0.95429	-0.804	0.94095	-0.89077	0.88534	-0.60306	0.7307	0.26018	0.91984	0.89598	0.53627	-0.47664	0.99997	-0.6056	0.80431	1.965	0.025043	0.73107	0.5354	-0.28188	0.91218	0.38458	0.77231
contig04504	---NA---	0.78066	0.39745	-0.072324	0.99556	0.35858	0.93429	0.67661	0.4325	0.26065	0.84703	-0.47026	0.60184	-0.028263	0.99997	0.30778	0.85613	1.4193	0.0085001	0.81361	0.24393	0.13245	0.94432	0.35952	0.67189
contig04505	CFDP2_BOVINRecName: Full=Craniofacial development protein 2; AltName: Full=p97 bucentaur protein	0.077322	0.94341	-0.32539	0.90952	-0.0030158	0.99945	0.377	0.45137	-0.042258	0.96655	-0.57631	0.23804	-0.021521	0.99997	0.32371	0.6379	0.64594	0.031919	0.41533	0.31541	0.18194	0.82793	0.3104	0.48633
contig04507	SPG7_RATRecName: Full=Paraplegin; Flags: Precursor	0.50893	0.3645	-0.17803	0.98863	0.077878	0.98444	-0.10671	0.89757	0.2064	0.78117	-0.42191	0.42988	-0.17409	0.99997	0.45368	0.49125	0.92004	0.0065319	0.21724	0.69499	-0.49066	0.46705	0.19387	0.72065
contig04508	---NA---	0.23913	0.68355	0.090884	0.9938	0.071814	0.98091	0.39486	0.32417	0.5171	0.19001	0.04593	0.9408	0.054803	0.99997	0.3292	0.55019	1.0735	0.00039712	0.59889	0.06566	0.22415	0.73671	0.61011	0.080485
contig04513	ROP_DROMERecName: Full=Protein ROP	0.093907	0.94	-0.20899	0.98287	-0.21343	0.94493	-0.0088243	0.99298	0.23258	0.76648	-0.0056867	0.99372	-0.031856	0.99997	0.35099	0.66971	0.90111	0.011552	-0.039003	0.96315	-0.50848	0.48289	0.12708	0.84383
contig04514	STXB1_CHICKRecName: Full=Syntaxin-binding protein 1; AltName: Full=N-Sec1; AltName: Full=Protein unc-18 homolog 1; Short=Unc18-1; AltName: Full=Protein unc-18 homolog A; Short=Unc-18A	0.18004	0.92255	-0.46522	0.9585	-0.42273	0.92539	-0.26311	0.83892	0.29225	0.83208	-0.46935	0.62601	-0.14907	0.99997	0.35079	0.83478	1.4139	0.011955	0.29989	0.76025	-0.80747	0.48036	0.20208	0.84253
contig04522	---NA---	0.10215	0.98411	-0.61695	0.99178	-1.2574	0.86941	0.28589	0.94594	-0.451	0.89882	-0.28047	0.9431	-1.8021	0.94732	0.33828	0.95435	2.6072	0.022202	0.90035	0.6155	0.2563	0.96048	0.89303	0.65357
contig04529	---NA---	0.10918	0.94403	-0.19737	0.99367	-0.05762	0.99314	0.39721	0.61483	0.5809	0.40344	0.54851	0.43424	-0.106	0.99997	-0.69045	0.40417	1.216	0.0063456	0.53402	0.38068	0.49227	0.60952	0.79516	0.17218
contig04534	LHPL4_HUMANRecName: Full=LHFPL tetraspan subfamily member 4 protein; AltName: Full=GABAA receptor regulatory Lhfpl4; AltName: Full=Lipoma HMGIC fusion partner-like 4 protein	0.93772	0.255	-0.077852	0.99519	0.18386	0.96995	0.88128	0.23184	0.261	0.8366	-0.24891	0.80329	-0.046226	0.99997	-0.36631	0.79396	1.6448	0.0023908	0.81582	0.21668	0.0077297	0.99667	0.68462	0.33185
contig04535	LHPL3_HUMANRecName: Full=LHFPL tetraspan subfamily member 3 protein; AltName: Full=Lipoma HMGIC fusion partner-like 3 protein	0.55115	0.40447	0.12696	0.9938	0.40267	0.8441	0.88796	0.076291	0.72174	0.20155	0.11896	0.88541	-0.10803	0.99997	-0.21471	0.86055	1.0105	0.0085093	0.91861	0.048179	0.35528	0.69855	0.48255	0.36317
contig04549	ADCL3_HUMANRecName: Full=Arylacetamide deacetylase-like 3	-0.25823	0.93632	-0.31169	0.9938	-1.0439	0.81699	-0.36866	0.86823	-0.2933	0.91453	1.1517	0.43817	-0.11684	0.99997	1.1918	0.46286	1.9767	0.031172	1.0476	0.36013	1.0132	0.56729	1.01	0.38507
contig04567	---NA---	0.35118	0.61164	-0.32066	0.93793	0.20609	0.94481	0.098741	0.90937	0.2576	0.70989	-0.23301	0.70176	-0.15664	0.99997	0.23001	0.81287	0.92832	0.0072765	0.39256	0.41579	-0.2167	0.81536	0.29527	0.56281
contig04608	---NA---	2.0233	0.27369	0.81824	0.97207	1.3663	0.79154	2.5811	0.089322	1.5397	0.3972	0.46042	0.84428	-0.098382	0.99997	0.26793	0.96204	3.0593	0.0081023	2.4984	0.073931	1.8496	0.40757	2.5589	0.087345
contig04627	---NA---	0.16871	0.9539	-0.26106	0.9938	0.28504	0.96995	-0.35295	0.84671	0.32524	0.87689	0.09739	0.95833	0.31509	0.99997	0.56491	0.82404	1.6765	0.029959	0.61563	0.62043	0.93562	0.68024	1.0251	0.4032
contig04657	---NA---	0.25518	0.71797	-0.40224	0.82652	0.24218	0.92203	0.019343	0.98275	0.47225	0.32827	-0.081651	0.90569	-0.27861	0.99997	-0.48033	0.41952	0.81308	0.0092818	0.095681	0.87693	-0.11979	0.90318	0.33259	0.45275
contig04659	---NA---	0.44627	0.53047	-0.25519	0.97811	0.26832	0.93176	0.081104	0.93487	0.61519	0.27872	0.013112	0.98846	-0.14682	0.99997	-0.30238	0.74897	0.86858	0.019014	0.14049	0.84378	0.056495	0.96632	0.47842	0.3572
contig04672	GEN_MOUSERecName: Full=Flap endonuclease GEN homolog 1	1.2293	0.50992	0.3435	0.9938	0.02683	0.99857	0.19735	0.94008	0.6563	0.76083	-0.87029	0.60202	-0.031258	0.99997	0.64534	0.82218	2.1579	0.026964	0.9981	0.49463	0.25704	0.94135	0.92951	0.52322
contig04682	PARL_BOVINRecName: Full=Presenilins-associated rhomboid-like protein, mitochondrial; AltName: Full=Mitochondrial intramembrane cleaving protease PARL; Contains: RecName: Full=P-beta; Short=Pbeta; Flags: Precursor	-0.26748	0.90726	-0.5398	0.96995	0.48532	0.9458	0.087351	0.96927	-0.28071	0.90459	0.31079	0.83408	0.63568	0.99997	1.056	0.52934	1.9341	0.018248	0.81919	0.43333	0.33565	0.89444	1.4821	0.17683
contig04685	---NA---	0.22363	0.70976	-0.24316	0.94095	0.096145	0.96995	0.24453	0.61082	0.38367	0.35904	-0.34073	0.42735	-0.12808	0.99997	-0.20254	0.77258	0.86709	0.0022151	0.5079	0.12284	0.25476	0.68911	0.6177	0.077695
contig04703	RTBS_DROMERecName: Full=Probable RNA-directed DNA polymerase from transposon BS; AltName: Full=Reverse transcriptase	0.47606	0.37347	0.47319	0.72357	0.50564	0.57717	0.62633	0.1466	0.54997	0.24118	0.22999	0.67941	0.029885	0.99997	-0.084571	0.95368	1.1577	0.00084382	0.4085	0.34258	0.015854	0.99005	0.030072	0.96299
contig04705	---NA---	1.0102	0.066283	0.82189	0.34263	0.37855	0.85937	0.90259	0.064496	1.1636	0.030587	0.69122	0.24787	-0.010622	0.99997	0.12232	0.937	1.3667	0.00091017	0.94398	0.038194	0.47672	0.54278	0.73651	0.13636
contig04712	PDC10_XENTRRecName: Full=Programmed cell death protein 10	0.80229	0.32804	0.1566	0.9938	-0.77649	0.59663	-0.167	0.89089	0.56876	0.49232	0.29342	0.77959	0.48393	0.99997	0.25009	0.89951	0.896	0.09315	1.403	0.021772	0.77461	0.49002	1.2985	0.074344
contig04719	---NA---	0.60922	0.24788	0.24511	0.96863	0.76895	0.21263	0.78781	0.06587	0.33541	0.56289	-0.22769	0.6958	-0.0073909	0.99997	0.24683	0.77605	0.64247	0.045066	0.94425	0.019321	0.57653	0.37102	0.76852	0.074344
contig04726	EF1D_XENLARecName: Full=Elongation factor 1-delta; Short=EF-1-delta; AltName: Full=P36	-0.10373	0.88765	0.05394	0.99454	0.18312	0.92488	0.83719	0.005644	0.28936	0.47363	-0.15174	0.73149	0.22286	0.99997	0.084305	0.93271	0.98679	0.00036448	0.87824	0.0038533	0.7768	0.044908	0.81432	0.011801
contig04733	---NA---	1.4953	0.17706	0.47985	0.97898	0.3786	0.95026	0.36075	0.82532	0.79619	0.51543	-0.0094636	0.99422	0.28072	0.99997	0.68254	0.68761	1.7127	0.016358	1.3781	0.11898	0.55302	0.76045	1.2249	0.20082
contig04735	---NA---	0.51434	0.35663	-0.038932	0.9957	0.42424	0.75677	0.3722	0.50464	0.39933	0.46695	0.17497	0.78167	-0.32649	0.99997	-0.34543	0.64284	0.67837	0.036642	0.24748	0.64231	-0.16707	0.86002	0.010605	0.98803
contig04736	---NA---	0.29142	0.58129	-0.038881	0.99556	0.32647	0.78162	0.55767	0.12243	0.37156	0.3765	0.1063	0.84566	-0.023751	0.99997	-0.1043	0.91877	0.5123	0.048858	0.34614	0.34239	0.23122	0.72684	0.32181	0.38892
contig04747	LRP6_MOUSERecName: Full=Low-density lipoprotein receptor-related protein 6; Short=LRP-6; Flags: Precursor	0.0073883	0.99633	-1.1855	0.060292	-0.97477	0.18865	-0.78268	0.15749	-0.69543	0.24688	-0.57015	0.37212	-0.70433	0.76077	-1.2134	0.033171	-0.11257	0.78276	-0.2556	0.70557	-0.28599	0.78637	-0.28624	0.6503
contig04764	---NA---	0.766	0.08865	0.26173	0.95105	0.23717	0.92193	0.55096	0.19912	0.59694	0.18468	-0.010534	0.98854	-0.23344	0.99997	0.073932	0.95998	1.1592	0.00063128	0.78642	0.033156	0.19752	0.80924	0.57987	0.15002
contig04774	SSRG_HUMANRecName: Full=Translocon-associated protein subunit gamma; Short=TRAP-gamma; AltName: Full=Signal sequence receptor subunit gamma; Short=SSR-gamma	0.1636	0.91071	0.072254	0.99516	0.42021	0.88882	0.52688	0.48969	0.11786	0.93329	-0.42575	0.57801	-0.019964	0.99997	0.92714	0.24987	0.85633	0.054861	0.75709	0.19374	0.49273	0.63278	1.2105	0.044109
contig04775	SSRG_MOUSERecName: Full=Translocon-associated protein subunit gamma; Short=TRAP-gamma; AltName: Full=Signal sequence receptor subunit gamma; Short=SSR-gamma	0.61137	0.36027	0.29504	0.96956	0.26514	0.93429	0.68339	0.23092	0.52507	0.40591	-0.14381	0.86131	0.28729	0.99997	1.0566	0.080773	1.321	0.0018523	0.92746	0.054781	0.66496	0.39142	1.223	0.019731
contig04780	PGBD1_HUMANRecName: Full=PiggyBac transposable element-derived protein 1; AltName: Full=Cerebral protein 4	0.43242	0.65155	0.25343	0.98482	-0.39264	0.89766	0.16638	0.87976	0.46453	0.55925	-0.14582	0.88083	0.29773	0.99997	0.71934	0.40001	1.1599	0.010391	0.46477	0.48308	-0.21224	0.87295	0.38036	0.57581
contig04781	---NA---	0.73488	0.26195	0.54986	0.8018	-0.25424	0.94054	-0.075487	0.94438	0.82161	0.17577	-0.17048	0.83761	0.23468	0.99997	0.69549	0.35818	1.0551	0.0099445	0.5478	0.32103	-0.11086	0.93812	0.39191	0.51178
contig04789	---NA---	1.0754	0.30108	0.88171	0.78009	0.48759	0.94809	1.142	0.42663	0.049055	0.98103	0.80864	0.47771	0.75812	0.99997	1.0452	0.49907	1.5369	0.029376	0.23994	0.86068	-0.26792	0.93433	-0.30678	0.80175
contig04792	---NA---	0.75804	0.36445	0.13376	0.9938	0.4713	0.87792	1.1858	0.066033	0.6627	0.39951	0.6296	0.42929	0.11728	0.99997	-0.036223	0.99162	1.8738	0.00067793	0.98634	0.10472	0.086486	0.96264	0.18216	0.83786
contig04804	---NA---	0.20276	0.90421	0.0011279	0.99986	0.23769	0.97614	-0.066597	0.97594	0.093567	0.95872	-0.034872	0.97894	-0.18867	0.99997	-0.29036	0.87102	1.2479	0.036435	0.64269	0.39878	0.63562	0.59072	0.062145	0.95587
contig04805	---NA---	-0.31771	0.76317	-0.88553	0.42151	-0.61394	0.69007	-0.42284	0.57876	0.51198	0.47823	0.3928	0.5891	-0.76877	0.73943	-1.7948	0.0012179	0.62421	0.1344	-0.21397	0.78078	-0.27006	0.81879	-0.1475	0.85227
contig04816	TMOD2_RATRecName: Full=Tropomodulin-2; AltName: Full=Neuronal tropomodulin; Short=N-Tmod	-0.71913	0.77809	-1.4933	0.89989	0.63335	0.96043	1.5603	0.50302	-0.40395	0.92049	-0.71164	0.69521	-0.87031	0.99997	-0.20936	0.97844	2.819	0.0093138	0.97406	0.46637	-0.37885	0.93666	0.57285	0.79817
contig04826	---NA---	0.49681	0.37149	-0.22124	0.97898	-0.13864	0.96491	-0.46151	0.35936	0.33389	0.56396	0.28169	0.61258	-0.24641	0.99997	-0.40925	0.54388	0.78773	0.015593	-0.035442	0.96355	-0.40757	0.55709	-0.13668	0.81107
contig04828	S6A12_HUMANRecName: Full=Sodium- and chloride-dependent betaine transporter; AltName: Full=BGT-1; AltName: Full=Na(+)/Cl(-) betaine/GABA transporter; AltName: Full=Solute carrier family 6 member 12	-1.0639	0.58618	-0.75423	0.96191	0.84533	0.95582	1.5527	0.50888	-0.23288	0.9398	2.0913	0.23764	-0.16407	0.99997	-0.18736	0.97597	2.3022	0.035408	2.3897	0.080732	-0.34329	0.92513	-0.44259	0.81742
contig04839	---NA---	0.54343	0.44547	0.15443	0.9938	0.336	0.9033	0.4725	0.46986	0.58125	0.34821	-0.15254	0.85217	1.0683	0.17673	0.40348	0.65474	0.87757	0.025043	0.85514	0.078587	0.53718	0.50989	0.78625	0.13324
contig04848	---NA---	0.53845	0.46831	0.40382	0.92629	0.34908	0.90192	1.0224	0.052264	0.56823	0.37738	-0.016079	0.98703	0.12517	0.99997	0.42654	0.64208	1.1771	0.0049523	0.89687	0.072014	0.46267	0.60669	0.5998	0.28051
contig04850	MGST3_MOUSERecName: Full=Microsomal glutathione S-transferase 3; Short=Microsomal GST-3; AltName: Full=Glutathione peroxidase MGST3; AltName: Full=Microsomal glutathione S-transferase III; Short=Microsomal GST-III	0.90378	0.35936	0.29851	0.98942	0.22625	0.96864	0.52405	0.6215	0.53089	0.62837	0.29215	0.7966	0.69921	0.99997	1.2388	0.22299	1.1732	0.040601	0.96129	0.19901	-0.023911	0.99166	0.81045	0.31299
contig04854	---NA---	0.49035	0.51514	-0.10695	0.9938	0.28525	0.93293	0.26742	0.74058	0.51513	0.42298	-0.26153	0.71727	-0.017952	0.99997	0.43916	0.61744	1.0563	0.008588	0.76274	0.12075	0.092604	0.9495	0.5388	0.32516
contig04855	---NA---	0.66227	0.21956	0.047647	0.99556	0.5398	0.58968	0.83404	0.058737	0.29497	0.65149	0.12365	0.86095	-0.085992	0.99997	0.052269	0.98012	0.82206	0.015167	0.67113	0.10805	0.20948	0.82066	0.39262	0.4115
contig04868	DTWD2_MOUSERecName: Full=DTW domain-containing protein 2	0.16053	0.85183	0.063121	0.99454	0.0059859	0.99857	0.093461	0.90341	0.32006	0.55009	-0.19453	0.72588	0.10566	0.99997	0.011393	0.99614	0.63434	0.034277	0.35619	0.40839	0.28411	0.69952	0.40918	0.33019
contig04883	---NA---	0.3098	0.63112	-0.13231	0.9938	0.1172	0.96995	0.78047	0.051854	0.21602	0.74394	-0.011038	0.98839	-0.017602	0.99997	-0.27136	0.72106	0.7691	0.013154	0.53751	0.17029	0.47246	0.45054	0.51862	0.21148
contig04884	---NA---	-0.029127	0.98805	0.41609	0.93756	0.20979	0.9583	1.0045	0.085112	0.5926	0.39818	0.1403	0.88306	0.46799	0.99997	0.45112	0.65068	0.9723	0.025267	0.45206	0.48503	-0.041696	0.97963	-0.11754	0.88836
contig04885	---NA---	0.95024	0.14595	0.72905	0.6377	0.77504	0.48087	1.1353	0.039372	0.36985	0.65687	1.0144	0.12872	0.75009	0.77436	0.98274	0.17031	1.2126	0.00596	1.3059	0.014277	0.86141	0.2951	0.8968	0.11451
contig04898	GCNT3_RATRecName: Full=Beta-1,3-galactosyl-O-glycosyl-glycoprotein beta-1,6-N-acetylglucosaminyltransferase 3; AltName: Full=C2GnT-mucin type; Short=C2GnT-M; AltName: Full=dI/C2/C4GnT; Short=dIGnT	0.29704	0.69636	0.027495	0.99726	0.26012	0.92409	0.10863	0.89913	0.75462	0.13834	0.22253	0.71921	0.014074	0.99997	-0.18532	0.86935	0.68491	0.040694	0.063036	0.93169	0.051877	0.96632	0.26914	0.60779
contig04901	---NA---	-0.86087	0.44655	-0.27172	0.9938	0.27206	0.96743	0.012953	0.99451	2.1611	0.11319	0.23187	0.876	0.23398	0.99997	-0.68008	0.6758	2.344	0.03187	1.7098	0.15226	-0.032606	0.99075	-0.20987	0.85405
contig04904	---NA---	-0.084042	0.96854	0.051543	0.99719	0.53334	0.89049	0.23038	0.8691	-0.014926	0.99482	0.073158	0.95816	0.1943	0.99997	-0.39802	0.83516	1.3651	0.010194	0.67467	0.34781	0.37653	0.81145	0.39627	0.66822
contig04933	---NA---	0.62903	0.078422	0.30517	0.84278	0.25607	0.8455	0.42585	0.22206	0.6419	0.073089	0.11589	0.809	0.087863	0.99997	0.2541	0.64284	0.69416	0.0053976	0.5181	0.082375	0.33901	0.49397	0.57779	0.070642
contig04940	TIM16_DROMERecName: Full=Mitochondrial import inner membrane translocase subunit Tim16; AltName: Full=Protein black pearl	0.37926	0.53024	-0.044236	0.99556	0.23422	0.92804	0.44896	0.35593	0.62755	0.18192	0.027881	0.97121	-0.081703	0.99997	-0.088304	0.9503	0.74156	0.018435	0.68613	0.077304	0.53823	0.38588	0.80014	0.056098
contig04949	KI13A_HUMANRecName: Full=Kinesin-like protein KIF13A; AltName: Full=Kinesin-like protein RBKIN	0.087915	0.97417	-0.029384	0.99792	0.60086	0.93366	1.1709	0.37478	-0.56553	0.71984	0.73056	0.5696	-0.12711	0.99997	-0.20304	0.96782	2.4458	0.020378	0.29004	0.84281	0.24193	0.94799	0.35453	0.83928
contig04966	---NA---	0.46349	0.3862	0.34675	0.88821	0.15103	0.95763	0.31055	0.56847	0.64677	0.16335	-0.10305	0.87765	0.056081	0.99997	-0.14506	0.89524	0.94624	0.0034938	0.7887	0.037739	0.57745	0.33745	0.36394	0.40524
contig04978	KCD20_HUMANRecName: Full=BTB/POZ domain-containing protein KCTD20; AltName: Full=Potassium channel tetramerization domain containing 20	0.19433	0.83968	0.22462	0.98049	0.042681	0.99437	0.29103	0.65651	0.91558	0.074989	0.23193	0.71381	0.29359	0.99997	0.26698	0.77153	0.75347	0.028757	0.22373	0.70422	0.032653	0.98023	0.32668	0.52671
contig04990	---NA---	0.45081	0.65221	0.035095	0.9977	-0.17522	0.96995	0.18749	0.86823	0.47488	0.57029	0.66054	0.37769	-0.29661	0.99997	0.2465	0.87574	1.2437	0.0087974	0.69201	0.26681	0.52049	0.62185	0.88969	0.15549
contig04994	---NA---	0.26143	0.8459	-0.048391	0.99719	-0.62031	0.75677	-0.47427	0.57712	0.11241	0.94162	0.2196	0.81933	-0.055457	0.99997	0.25698	0.8729	1.1382	0.017861	0.44805	0.54073	-0.018876	0.99194	0.16197	0.85573
contig04998	PSMG2_DANRERecName: Full=Proteasome assembly chaperone 2; AltName: Full=Tumor necrosis factor superfamily member 5-induced protein 1 homolog	0.26658	0.73961	-0.54113	0.68486	-0.19303	0.94689	-0.017375	0.98678	0.23258	0.75173	-0.25043	0.67912	-0.26715	0.99997	-0.15589	0.89941	1.0884	0.0025202	0.48342	0.29057	0.23008	0.80164	0.61383	0.17934
contig05018	GATC_BRAFLRecName: Full=Glutamyl-tRNA(Gln) amidotransferase subunit C, mitochondrial; Short=Glu-AdT subunit C; Flags: Precursor	0.37976	0.51148	-0.13569	0.99367	0.51343	0.54436	0.5277	0.23175	0.45007	0.34727	0.093324	0.88818	-0.18405	0.99997	-0.36986	0.56295	0.63891	0.03377	0.48032	0.22614	0.20977	0.79723	0.30174	0.49986
contig05026	---NA---	0.17894	0.89606	-0.14385	0.9938	-0.15384	0.97137	-0.17568	0.86874	0.0017553	0.9993	-0.77079	0.27597	0.53265	0.99997	0.016068	0.99622	0.92716	0.033564	0.57645	0.34339	-0.34712	0.75865	0.27123	0.70475
contig05029	---NA---	0.32288	0.63521	-0.26525	0.9585	0.16873	0.95308	0.43473	0.4009	0.33294	0.56621	0.0073706	0.9917	-0.09771	0.99997	-0.30866	0.69146	1.1567	0.0012022	0.34145	0.47611	-0.31747	0.68353	0.067922	0.91672
contig05030	---NA---	0.4337	0.33153	-0.09276	0.9938	0.10512	0.96743	0.094983	0.88585	0.35558	0.40566	-0.13885	0.78702	-0.038271	0.99997	-0.059508	0.9652	0.64227	0.016025	0.35295	0.33452	-0.06343	0.94723	0.29424	0.44039
contig05031	STK40_CHICKRecName: Full=Serine/threonine-protein kinase 40; AltName: Full=Serine/threonine-protein kinase lyk4	0.41738	0.83631	-0.51022	0.97711	0.38771	0.95055	0.61808	0.6526	0.47101	0.77303	0.66566	0.59187	-0.70461	0.99997	-1.2589	0.35834	1.7034	0.019845	0.49493	0.6863	-0.053823	0.98577	0.38467	0.75599
contig05036	ACY1_PIGRecName: Full=Aminoacylase-1; Short=ACY-1; AltName: Full=N-acyl-L-amino-acid amidohydrolase	0.16968	0.88855	0.032287	0.99726	0.074785	0.9892	0.23722	0.78018	0.40249	0.56979	0.36861	0.58188	0.2943	0.99997	0.24229	0.84193	0.77138	0.047722	0.4525	0.42495	0.57886	0.47608	0.70474	0.1866
contig05042	---NA---	0.77896	0.26406	-0.093909	0.99454	0.035489	0.99566	0.0036575	0.99745	0.80066	0.21482	0.051942	0.95943	-0.19989	0.99997	-0.20037	0.89654	0.93056	0.028906	0.63254	0.26999	0.27302	0.81656	0.59029	0.32128
contig05077	TPM_ECHMURecName: Full=Tropomyosin	0.33233	0.8235	-0.44494	0.9585	-0.00055151	0.99974	0.11253	0.93883	0.17961	0.91164	-0.82064	0.34877	0.01227	0.99997	0.56785	0.64713	1.0971	0.041896	1.0824	0.10999	0.73432	0.51674	1.1851	0.10055
contig05080	MODSP_DROMERecName: Full=Modular serine protease; Contains: RecName: Full=Modular serine protease non-catalytic chain; Contains: RecName: Full=Modular serine protease catalytic chain; Flags: Precursor	0.38487	0.76596	0.10448	0.99454	-0.24067	0.96151	0.72974	0.37615	0.9331	0.23877	0.99717	0.23817	-0.56888	0.99997	-0.98002	0.37685	1.1673	0.025793	0.38889	0.64974	-0.06442	0.97614	-0.0012449	0.99928
contig05082	---NA---	0.48609	0.59333	0.60301	0.81468	-0.0010074	0.99974	0.58902	0.42085	1.2098	0.072012	0.87369	0.22813	-0.21899	0.99997	-0.67405	0.44417	0.89237	0.045354	0.70025	0.23905	-0.15794	0.91687	-0.189	0.81287
contig05086	---NA---	0.69154	0.39374	-0.32552	0.97711	0.67083	0.68827	0.81169	0.23143	0.36218	0.70375	-0.092392	0.93203	-0.30835	0.99997	0.24006	0.8796	1.132	0.01575	0.62358	0.33129	0.4587	0.68238	1.067	0.084138
contig05088	---NA---	0.39741	0.57474	-0.064107	0.99454	0.22963	0.93908	0.34704	0.58515	0.41275	0.49673	0.041522	0.96133	0.051321	0.99997	0.50945	0.47041	0.95506	0.0085131	0.47605	0.33157	0.41586	0.59743	0.91887	0.053188
contig05105	---NA---	0.076743	0.96862	-0.30663	0.98063	-0.32745	0.93429	-0.42035	0.63195	0.56046	0.48796	-0.36682	0.66525	-0.21125	0.99997	0.10272	0.9669	1.1255	0.018483	0.42809	0.56198	0.22824	0.87199	0.92157	0.14923
contig05118	---NA---	0.58093	0.14591	0.32827	0.84826	0.0968	0.96995	0.11799	0.84834	0.49397	0.20709	-0.20855	0.64949	0.046207	0.99997	0.38086	0.45883	0.90442	0.0014929	0.70493	0.02849	0.39869	0.45367	0.72387	0.036634
contig05125	---NA---	0.97963	0.12723	0.36004	0.9565	0.30761	0.93176	0.46772	0.51688	0.71081	0.27102	0.084305	0.9313	0.011843	0.99997	0.33938	0.75515	1.3712	0.0023815	0.75975	0.15436	-0.10677	0.94385	0.67899	0.23716
contig05126	---NA---	0.49793	0.30541	0.54528	0.54338	-0.020114	0.99645	-0.019145	0.98232	0.50958	0.24968	-0.17687	0.7447	0.44312	0.90921	0.63473	0.21422	0.63292	0.029691	0.39971	0.31791	0.17349	0.83168	0.41697	0.30344
contig05138	---NA---	-0.28391	0.72534	-1.0358	0.060292	-1.0797	0.038487	-0.85798	0.059915	-0.11428	0.91164	-0.95	0.074403	-0.93568	0.18478	-0.98223	0.059859	-0.29249	0.38869	-0.69874	0.1054	-0.50501	0.4799	-0.3686	0.46467
contig05151	ZUP1_MOUSERecName: Full=Zinc finger-containing ubiquitin peptidase 1; AltName: Full=Lys-63-specific deubiquitinase ZUFSP; Short=DUB; AltName: Full=Zinc finger with UFM1-specific peptidase domain protein	-0.14169	0.94	-1.1432	0.38575	0.35684	0.93493	0.98501	0.19685	0.11752	0.94601	0.28247	0.78371	0.57723	0.99997	-0.82085	0.49418	1.0454	0.047751	0.94314	0.22712	0.78044	0.53321	1.414	0.075575
contig05155	STABP_XENLARecName: Full=STAM-binding protein-like	0.31076	0.86295	-0.54153	0.95197	0.21255	0.97324	0.054021	0.97661	0.45116	0.73469	0.41303	0.71878	-0.53832	0.99997	-1.4226	0.1788	1.3172	0.033854	-0.2327	0.84854	-0.74814	0.58624	0.35042	0.73895
contig05157	STABP_HUMANRecName: Full=STAM-binding protein; AltName: Full=Associated molecule with the SH3 domain of STAM; AltName: Full=Endosome-associated ubiquitin isopeptidase	0.3072	0.80238	-0.28695	0.98162	-0.60369	0.75543	-0.48471	0.55277	0.81735	0.24473	0.37407	0.64734	-0.46873	0.99997	-0.56509	0.56578	1.195	0.011174	0.059585	0.9554	-0.51427	0.62588	0.12353	0.89043
contig05158	---NA---	0.19468	0.94116	-0.55192	0.97023	0.075034	0.99544	0.61234	0.66452	0.009726	0.99826	-0.39893	0.78105	-0.084916	0.99997	0.63526	0.73326	1.8927	0.011876	0.60733	0.60872	-0.76161	0.66233	0.79917	0.4574
contig05161	---NA---	0.32495	0.71292	0.17756	0.99367	0.47108	0.78983	0.48945	0.43829	0.49136	0.44103	0.77117	0.21234	-0.30695	0.99997	-0.318	0.74787	0.81215	0.034055	0.3918	0.49694	-0.31999	0.74547	-0.14303	0.83901
contig05179	MFS4B_DANRERecName: Full=Sodium-dependent glucose transporter 1; AltName: Full=Major facilitator superfamily domain-containing protein 4B	-0.2476	0.94116	0.96608	0.92597	-0.7076	0.94481	-0.68705	0.75536	0.3586	0.90772	1.9735	0.19655	1.0403	0.99997	0.14912	0.98296	2.9218	0.0078312	0.27624	0.8851	0.1075	0.97871	-0.26692	0.89745
contig05188	---NA---	-0.00063446	0.99965	0.02795	0.99726	0.50527	0.67169	1.0361	0.017859	0.52412	0.33106	0.04139	0.95943	0.16134	0.99997	-0.19541	0.86055	0.12169	0.72602	0.53304	0.23775	0.76103	0.23795	0.81714	0.072803
contig05210	CRBL2_XENTRRecName: Full=cAMP-responsive element-binding protein-like 2	0.30932	0.71679	-0.59837	0.68104	0.32767	0.8974	0.72453	0.16298	0.21823	0.80372	-0.37649	0.54473	-0.38077	0.99997	-0.33915	0.70856	0.76248	0.038517	0.65958	0.16206	0.21454	0.83714	0.62707	0.21148
contig05219	---NA---	0.061279	0.98202	-0.54427	0.9585	0.30855	0.96037	1.3912	0.12243	-0.29776	0.86434	-0.35376	0.78019	-0.086145	0.99997	-0.065818	0.98882	1.6101	0.015017	0.60407	0.55115	0.10256	0.96628	0.45529	0.66469
contig05221	---NA---	0.78624	0.3587	0.15417	0.9938	0.049654	0.99544	0.3431	0.73827	0.76378	0.33389	0.19248	0.85458	-0.07766	0.99997	0.081953	0.97894	1.4376	0.0057095	0.54695	0.45626	-0.16481	0.92273	0.6067	0.39441
contig05222	---NA---	0.58675	0.35663	-0.10347	0.9938	0.053937	0.99239	0.46035	0.45759	0.42461	0.5085	-0.5021	0.40698	-0.24416	0.99997	0.2999	0.7562	0.9871	0.0093896	0.77956	0.092275	0.16606	0.88473	0.83658	0.090684
contig05223	---NA---	0.16805	0.89504	-0.22702	0.9863	-0.27102	0.93493	0.28355	0.73433	0.19497	0.85457	-0.27046	0.71906	-0.23447	0.99997	-0.020404	0.99432	1.0475	0.011634	0.21488	0.76801	-0.62859	0.45182	-0.036902	0.96624
contig05227	---NA---	0.2082	0.9212	-0.31171	0.99198	0.3332	0.95177	1.0674	0.24816	0.78624	0.45693	0.44612	0.69481	-0.28392	0.99997	-0.72939	0.59712	1.9848	0.0030491	0.55186	0.57702	0.48281	0.76676	0.60392	0.52061
contig05228	MED31_XENTRRecName: Full=Mediator of RNA polymerase II transcription subunit 31; AltName: Full=Mediator complex subunit 31; AltName: Full=Mediator complex subunit soh1	0.03558	0.98508	-0.73965	0.67455	0.0046861	0.99945	0.64313	0.36213	0.30271	0.76178	0.21734	0.81002	-0.5926	0.9947	-0.93222	0.24751	1.1475	0.01229	0.24835	0.75548	-0.0074539	0.99633	0.25007	0.74278
contig05257	---NA---	0.42423	0.69862	0.60007	0.85714	0.046005	0.99544	0.20248	0.86268	0.60632	0.45402	0.55181	0.48775	0.73333	0.91454	0.2905	0.84978	1.071	0.026959	0.22112	0.80514	0.7464	0.45055	0.44141	0.54409
contig05275	CSTF3_MOUSERecName: Full=Cleavage stimulation factor subunit 3; AltName: Full=CF-1 77 kDa subunit; AltName: Full=Cleavage stimulation factor 77 kDa subunit; Short=CSTF 77 kDa subunit; Short=CstF-77	0.99373	0.25833	-0.14675	0.9938	0.48445	0.89373	0.81674	0.31862	1.2169	0.13509	0.58739	0.51087	-0.23167	0.99997	-0.53886	0.6693	1.2777	0.018466	0.68457	0.36512	0.33975	0.81974	0.80106	0.28197
contig05296	---NA---	0.73887	0.17253	0.33302	0.93727	0.24852	0.93429	0.33056	0.59918	1.0453	0.039774	0.51581	0.35654	0.11015	0.99997	-0.32612	0.69874	0.94068	0.0081393	0.51816	0.26548	0.2325	0.80589	0.23896	0.6677
contig05309	---NA---	-0.31107	0.80113	0.11703	0.99454	-0.30664	0.93582	-0.041401	0.9758	-0.20562	0.8693	-0.86364	0.25499	0.53794	0.99997	0.15798	0.94537	1.1226	0.031622	0.85509	0.14986	1.0607	0.2951	0.96316	0.17381
contig05338	ULK2_MOUSERecName: Full=Serine/threonine-protein kinase ULK2; AltName: Full=Serine/threonine-protein kinase Unc51.2; AltName: Full=Unc-51-like kinase 2	-0.042775	0.9921	-0.24149	0.99454	-0.40974	0.96522	-0.7744	0.72582	-0.71039	0.77221	-0.81296	0.63504	-0.97718	0.99997	0.04169	0.99614	2.0417	0.036845	0.6493	0.69499	0.10598	0.97937	0.58246	0.75378
contig05362	---NA---	0.69906	0.59582	-0.31004	0.99367	-1.7802	0.1047	-1.0915	0.25364	-0.28744	0.86859	-0.2586	0.84826	-0.82166	0.99997	-0.21325	0.94743	1.4309	0.047123	0.59047	0.55726	-0.9996	0.50917	-0.20835	0.88009
contig05364	---NA---	0.82885	0.27991	0.36426	0.96201	-1.6506	0.012223	-1.7305	0.0032987	-0.20731	0.86859	-0.94341	0.20933	-0.095354	0.99997	0.087893	0.97315	0.97342	0.036502	0.61563	0.34326	-0.32636	0.79572	-0.0087803	0.99368
contig05381	Y045_METMARecName: Full=Putative ankyrin repeat protein MM_0045	0.55146	0.75278	-0.38835	0.98865	-2.7597	0.021166	-2.3288	0.027584	-0.16859	0.94217	-1.4155	0.28005	-0.0050579	0.99997	-0.5091	0.83478	1.4444	0.1482	0.79081	0.45388	0.37463	0.87733	0.28562	0.84696
contig05397	---NA---	0.31525	0.78345	-0.45963	0.92597	-0.11999	0.9818	0.18843	0.86232	0.10052	0.94541	-0.57218	0.43448	-0.1801	0.99997	0.012861	0.99684	1.4789	0.0022459	0.84933	0.13382	0.02178	0.99075	0.6834	0.27102
contig05398	---NA---	-0.6968	0.41885	-0.83578	0.62737	0.20204	0.96522	0.52505	0.53118	-0.10586	0.94715	-0.44161	0.59191	0.4125	0.99997	0.9237	0.29357	1.5705	0.0024093	0.86604	0.15846	0.082168	0.96396	0.25564	0.75549
contig05437	---NA---	0.45129	0.56301	-0.32994	0.9585	0.47159	0.79965	0.79937	0.14512	0.50495	0.43834	0.11557	0.89512	-0.42857	0.99997	-0.41084	0.64884	0.95231	0.016586	0.71891	0.15067	0.41609	0.64853	0.58663	0.2814
contig05443	---NA---	0.85583	0.26612	0.46773	0.92842	0.61023	0.75809	1.2112	0.048958	0.68683	0.3591	0.7366	0.33084	0.25665	0.99997	0.72181	0.43142	1.7649	0.00082758	1.1752	0.043735	0.51271	0.63527	0.85104	0.1832
contig05469	---NA---	1.5086	0.18163	0.53552	0.97023	0.46333	0.93993	0.40833	0.7961	0.88846	0.46171	-0.34185	0.8124	0.27301	0.99997	1.1191	0.42433	0.27767	0.70424	1.1378	0.22851	1.5571	0.25468	2.0327	0.033616
contig05471	---NA---	0.44557	0.52234	0.13611	0.9938	0.18517	0.95518	0.62428	0.23829	0.42249	0.49498	-0.058437	0.94549	-0.035888	0.99997	0.10779	0.9468	1.0659	0.0047684	0.61636	0.18616	0.21639	0.83008	0.17732	0.77741
contig05531	ARL1_CAEELRecName: Full=ADP-ribosylation factor-like protein 1	0.12375	0.95522	-0.31427	0.98865	-0.061507	0.99544	-0.1124	0.9423	0.32384	0.81939	-1.0703	0.25863	0.41343	0.99997	1.0372	0.3452	1.5844	0.0082672	0.9849	0.19107	1.148	0.37738	1.1949	0.12584
contig05532	ARL1_RATRecName: Full=ADP-ribosylation factor-like protein 1	0.61413	0.38685	0.0034638	0.99948	0.21557	0.95166	0.19764	0.83549	0.29834	0.72953	-0.50255	0.45022	0.67075	0.84554	1.1022	0.080773	1.1282	0.0071748	1.4545	0.005214	1.0761	0.15077	1.596	0.0037128
contig05547	---NA---	-0.27841	0.91385	-1.019	0.83442	0.012686	0.99885	-0.84079	0.59842	0.14095	0.96124	0.24618	0.90025	0.96308	0.99997	0.58812	0.87619	2.4802	0.0072749	0.02717	0.98985	-0.0018007	0.9994	-0.13998	0.9312
contig05551	---NA---	-0.33453	0.88985	0.72712	0.94095	0.05323	0.99741	-0.37896	0.8566	1.8079	0.30061	1.0808	0.39872	0.6913	0.99997	0.59619	0.87312	2.5643	0.024155	0.75969	0.52589	-0.22201	0.96023	-0.078155	0.97564
contig05579	---NA---	0.8477	0.41724	0.10831	0.99454	0.26236	0.96275	0.23722	0.86823	0.71622	0.46728	-0.4448	0.67183	0.15197	0.99997	0.78066	0.5173	1.9226	0.0023152	1.4143	0.051371	0.69652	0.59118	1.3103	0.092245
contig05593	IPP_HUMANRecName: Full=Actin-binding protein IPP; AltName: Full=Intracisternal A particle-promoted polypeptide; Short=IPP; AltName: Full=Kelch-like protein 27	0.35394	0.85154	-0.66176	0.92823	0.35122	0.95166	0.55424	0.6603	0.32089	0.85149	0.51084	0.66649	-0.18231	0.99997	-0.45294	0.81314	1.4045	0.033424	0.68994	0.48509	-0.18035	0.93903	0.63541	0.5202
contig05594	IPP_HUMANRecName: Full=Actin-binding protein IPP; AltName: Full=Intracisternal A particle-promoted polypeptide; Short=IPP; AltName: Full=Kelch-like protein 27	0.015439	0.995	0.11199	0.99454	0.4472	0.92539	0.31406	0.81237	0.50569	0.66074	0.952	0.31094	0.10782	0.99997	-0.48842	0.74613	1.3309	0.02372	-0.11718	0.92638	-0.59812	0.66583	-0.012862	0.9921
contig05602	U729_DROMERecName: Full=UPF0729 protein CG18508	0.47736	0.63074	0.27782	0.98392	-0.10974	0.98525	0.25355	0.81119	0.69861	0.35021	-0.25449	0.78035	0.46763	0.99997	0.75787	0.40306	1.2844	0.0079683	0.64071	0.32364	-0.12454	0.9412	0.66194	0.31391
contig05603	GLRX_RICCORecName: Full=Glutaredoxin	0.52141	0.35805	0.25866	0.96191	0.12053	0.96998	0.50834	0.31087	0.6198	0.21624	-0.353	0.52353	0.37372	0.99997	0.79578	0.14525	0.90477	0.0078724	0.77601	0.058577	0.24153	0.7834	0.68717	0.1216
contig05613	---NA---	0.23131	0.7458	0.04619	0.99519	0.18067	0.94493	0.7119	0.071841	0.23677	0.69348	0.020896	0.97741	0.21662	0.99997	0.06955	0.96284	0.70232	0.018868	0.6453	0.080732	0.17222	0.83696	0.030414	0.96095
contig05662	---NA---	0.18688	0.94427	-0.67491	0.94548	0.85547	0.88547	0.82201	0.57968	-0.40759	0.84821	0.47384	0.72905	-0.32961	0.99997	-0.40678	0.92216	2.166	0.0059083	0.2152	0.88636	-0.062025	0.9856	-0.59573	0.60555
contig05666	---NA---	0.51901	0.26024	0.26169	0.94095	0.40436	0.69377	0.58846	0.13187	0.67213	0.11672	0.075904	0.90505	0.088029	0.99997	-0.087438	0.94352	0.7713	0.0078724	0.90651	0.011028	0.62086	0.247	0.76901	0.04199
contig05686	---NA---	0.035934	0.97105	-0.057169	0.99454	-0.023281	0.99544	0.23179	0.58304	0.41666	0.24417	-0.13141	0.77179	0.14091	0.99997	0.021779	0.98903	0.54625	0.021126	0.56314	0.05336	0.33895	0.48593	0.59184	0.060005
contig05687	TM242_DANRERecName: Full=Transmembrane protein 242	1.2387	0.26603	0.95338	0.78474	-0.7421	0.87701	0.15074	0.94074	0.7052	0.56058	1.6905	0.1638	-0.76079	0.99997	-0.43268	0.86047	1.6556	0.045506	0.87108	0.42525	-0.014339	0.99542	-0.219	0.87899
contig05719	---NA---	0.079297	0.98072	0.28608	0.9938	0.033924	0.99794	0.54657	0.77055	-0.36164	0.88132	-0.24811	0.89938	0.030091	0.99997	-0.35717	0.9156	2.3372	0.037184	0.7937	0.50411	0.28172	0.92458	0.54497	0.70507
contig05722	F135B_XENLARecName: Full=Protein FAM135B	0.10664	0.962	-0.474	0.9585	-0.49481	0.89897	-1.1213	0.15618	-1.0018	0.24314	0.55563	0.55856	-0.0088736	0.99997	-0.11559	0.97439	2.2006	0.0016518	0.83954	0.26891	0.062705	0.98129	0.32566	0.76203
contig05738	---NA---	0.59801	0.37955	0.11736	0.9938	0.38126	0.87792	0.57132	0.34734	0.40185	0.56979	0.5074	0.42885	-0.20203	0.99997	-0.10601	0.95472	1.0184	0.010724	0.83081	0.088461	0.39369	0.67343	0.73919	0.16257
contig05746	UBP34_HUMANRecName: Full=Ubiquitin carboxyl-terminal hydrolase 34; AltName: Full=Deubiquitinating enzyme 34; AltName: Full=Ubiquitin thioesterase 34; AltName: Full=Ubiquitin-specific-processing protease 34	-0.14561	0.962	-0.48892	0.98162	-0.026982	0.99852	-0.44832	0.81964	-0.56755	0.72491	-0.28718	0.85902	-0.56404	0.99997	-0.38246	0.9155	2.2373	0.011614	0.64747	0.59536	0.60497	0.81616	0.77623	0.5499
contig05759	ZDH14_HUMANRecName: Full=Probable palmitoyltransferase ZDHHC14; AltName: Full=NEW1 domain-containing protein; Short=NEW1CP; AltName: Full=Zinc finger DHHC domain-containing protein 14; Short=DHHC-14	-0.28483	0.8994	0.048998	0.99792	-4.9558	0.00049293	-3.9946	0.0029725	0.22492	0.94541	1.0008	0.38851	-0.058925	0.99997	0.061311	0.99162	1.556	0.052362	0.11582	0.94899	0.26386	0.93001	0.24458	0.87299
contig05775	---NA---	0.28726	0.90898	1.1453	0.69375	-1.242	0.72795	-0.71469	0.68534	0.64672	0.63971	2.4974	0.042872	0.17318	0.99997	0.067634	0.98892	1.429	0.046714	-0.068899	0.96432	-0.24956	0.91781	0.17119	0.90378
contig05776	AATF_RATRecName: Full=Protein AATF; AltName: Full=Apoptosis-antagonizing transcription factor	0.3053	0.7133	-0.38717	0.91138	-0.16059	0.96275	-0.045759	0.96316	0.60761	0.27715	0.072893	0.93121	-0.3184	0.99997	-0.38294	0.64341	0.86537	0.017769	0.1878	0.7722	-0.29591	0.75073	0.4415	0.39148
contig05784	---NA---	0.75356	0.21629	0.35415	0.94095	0.18865	0.95697	-0.12143	0.89989	0.67836	0.23808	0.04917	0.95659	-0.07992	0.99997	-0.062643	0.97836	0.74434	0.04747	0.83329	0.076679	0.21902	0.83756	0.67241	0.19108
contig05788	TERA_XENTRRecName: Full=Transitional endoplasmic reticulum ATPase; Short=TER ATPase; AltName: Full=15S Mg(2+)-ATPase p97 subunit; Short=p97; AltName: Full=Valosin-containing protein; Short=VCP	0.1152	0.91694	0.092315	0.9938	-0.3302	0.8757	-0.20831	0.76815	0.10034	0.92006	-0.20358	0.74248	0.44673	0.98499	0.16642	0.88656	0.66471	0.044242	0.18796	0.74822	0.22913	0.79954	0.41582	0.37982
contig05799	---NA---	0.43077	0.69761	0.12392	0.99454	-0.11573	0.98709	0.1039	0.94384	0.72106	0.35517	0.47365	0.56788	0.20724	0.99997	-0.36165	0.78868	2.0304	0.0010395	0.42608	0.57962	0.87502	0.3714	0.84471	0.20438
contig05800	---NA---	0.45003	0.37912	0.083543	0.9938	0.42996	0.68266	0.98868	0.0081252	0.70448	0.11482	-0.013973	0.98479	0.13285	0.99997	0.48571	0.38949	1.0214	0.0015603	0.93446	0.011812	0.2843	0.69159	0.88767	0.025219
contig05809	---NA---	-0.19012	0.85122	-0.030668	0.99719	0.24606	0.93429	1.0885	0.016928	0.49438	0.38672	0.010828	0.98966	-0.038702	0.99997	0.1526	0.90885	0.64894	0.064636	0.62525	0.16938	0.30759	0.73149	0.71514	0.13324
contig05894	S2611_HUMANRecName: Full=Sodium-independent sulfate anion transporter; AltName: Full=Solute carrier family 26 member 11	-0.080197	0.97253	-0.13434	0.99454	-0.15668	0.98005	0.68737	0.45809	0.16102	0.92457	0.17312	0.88733	-0.55365	0.99997	0.8981	0.40067	1.143	0.039228	0.30274	0.75892	-0.64327	0.65943	-0.024884	0.98528
contig05909	NDUS4_MOUSERecName: Full=NADH dehydrogenase	0.5243	0.62998	-0.061962	0.9957	0.80987	0.62568	1.1767	0.092261	0.62045	0.47956	-0.79843	0.33793	0.016474	0.99997	0.66696	0.53726	0.9196	0.071588	1.5474	0.016901	1.1095	0.25986	1.459	0.034171
contig05915	ZNT5_XENTRRecName: Full=Zinc transporter 5; Short=ZnT-5; AltName: Full=Solute carrier family 30 member 5	-0.024189	0.99291	-0.85177	0.8319	-0.40032	0.94427	0.056106	0.98357	-0.68132	0.62158	-0.20326	0.92329	-1.0573	0.98924	-0.34474	0.90729	1.5213	0.039039	-0.30522	0.79847	-0.68016	0.73734	0.084912	0.95562
contig05923	---NA---	0.99648	0.14199	0.31585	0.97445	0.58108	0.74999	0.44852	0.5669	1.0435	0.11672	-0.27204	0.74003	0.33434	0.99997	0.49329	0.61744	0.98049	0.026367	1.1932	0.02922	1.2595	0.097836	1.4082	0.017798
contig05966	PPIC_MOUSERecName: Full=Peptidyl-prolyl cis-trans isomerase C; Short=PPIase C; AltName: Full=Cyclophilin C; AltName: Full=Rotamase C	0.30192	0.8587	-0.14861	0.99454	0.45856	0.92363	0.4886	0.66202	1.2127	0.17232	0.49289	0.63019	0.13571	0.99997	-0.046076	0.99143	1.4685	0.013469	0.49893	0.58981	0.21358	0.91288	0.88848	0.27355
contig05971	ARP8_DANRERecName: Full=Actin-related protein 8	0.23296	0.77868	-0.25448	0.96213	0.18305	0.94809	0.18343	0.80074	0.10893	0.91054	-0.51165	0.33133	0.03442	0.99997	0.23358	0.79926	0.72243	0.027166	0.23317	0.66671	-0.3149	0.69199	0.26491	0.60203
contig05984	SRSF7_HUMANRecName: Full=Serine/arginine-rich splicing factor 7; AltName: Full=Splicing factor 9G8; AltName: Full=Splicing factor, arginine/serine-rich 7	0.38848	0.55656	-0.26567	0.95957	0.32992	0.87701	0.21664	0.7583	0.63704	0.20898	-0.1473	0.83031	0.18944	0.99997	0.47771	0.4776	0.74208	0.026992	0.78036	0.060294	0.53529	0.42789	1.0423	0.020783
contig05992	BRCA1_ARATHRecName: Full=Protein BREAST CANCER SUSCEPTIBILITY 1 homolog; Short=AtBRCA1	-0.15098	0.95585	-0.26082	0.9938	-0.74125	0.86324	-0.26152	0.91122	-0.42229	0.871	1.989	0.13607	3.8102	0.030087	0.74928	0.69881	0.87374	0.4276	0.068724	0.9812	-0.1134	0.96847	0.45818	0.69596
contig06004	KRP95_STRPURecName: Full=Kinesin-II 95 kDa subunit; AltName: Full=KRP-85/95 95 kDa subunit	1.1842	0.48068	1.0174	0.88725	0.019663	0.99857	1.1112	0.52217	0.77208	0.66247	2.3368	0.14315	1.044	0.99997	0.66676	0.84736	2.8377	0.0069436	1.3084	0.28357	0.66446	0.80911	0.22691	0.91025
contig06015	STK10_BOVINRecName: Full=Serine/threonine-protein kinase 10	-0.43225	0.82922	0.12543	0.99454	-0.15264	0.9897	0.093257	0.96773	0.125	0.95927	0.087035	0.95998	-0.6397	0.99997	-0.62911	0.80364	1.9719	0.0086632	0.71528	0.51577	-0.28999	0.91484	0.10724	0.94986
contig06025	---NA---	0.62109	0.17706	0.01858	0.99792	0.53698	0.47894	0.60484	0.13747	0.47666	0.29617	0.25465	0.61556	-0.2794	0.99997	-0.23304	0.76322	0.64176	0.028672	0.53763	0.14889	0.072333	0.94505	0.58248	0.13936
contig06032	---NA---	0.4243	0.91566	-0.1297	0.99654	-0.80006	0.96522	0.5535	0.88473	-0.37148	0.91881	-0.75734	0.76459	-0.48517	0.99997	0.35777	0.96306	2.5218	0.039907	1.0984	0.50265	-0.92373	0.82853	0.52807	0.85317
contig06044	---NA---	0.95287	0.049937	0.78288	0.25114	1.3149	0.0029163	1.754	1.7459e-05	1.4429	0.0008088	1.0525	0.031677	0.49852	0.9069	0.69001	0.23565	1.7586	1.3099e-05	1.5228	0.00018088	0.64182	0.30915	0.79849	0.067299
contig06112	---NA---	0.22408	0.85754	-0.13431	0.9938	-0.0094645	0.99857	0.59271	0.38976	0.042702	0.97636	-0.37576	0.61556	0.166	0.99997	0.23275	0.87327	0.92174	0.03279	0.88136	0.10289	0.39744	0.71243	0.28025	0.6902
contig06126	---NA---	0.40915	0.64965	-0.27187	0.98051	-0.17485	0.96522	0.16367	0.87287	0.33412	0.69327	-0.53623	0.43291	-0.07251	0.99997	0.39638	0.69689	0.90124	0.031105	0.77169	0.14619	0.2116	0.86245	0.71877	0.20561
contig06130	---NA---	0.17516	0.84148	-0.057945	0.99454	0.37748	0.79698	0.76125	0.067212	0.56027	0.23877	0.17908	0.7639	-0.201	0.99997	-0.486	0.42599	0.96974	0.0034093	0.406	0.35402	-0.18514	0.83294	0.25678	0.59717
contig06133	---NA---	0.43766	0.74465	-0.31429	0.98514	-0.20324	0.97008	0.036859	0.98232	0.3799	0.75836	-0.53172	0.5764	-0.25245	0.99997	0.51427	0.70832	1.4963	0.008987	0.71288	0.36478	0.169	0.93024	0.88846	0.24753
contig06160	---NA---	1.4645	0.19429	0.34265	0.99305	0.42892	0.9458	0.72284	0.56718	-0.076173	0.97442	-0.9751	0.39841	-0.708	0.99997	-0.27864	0.93324	1.4987	0.03481	0.82325	0.42248	-0.75517	0.69844	0.11294	0.94547
contig06175	---NA---	0.055114	0.98797	0.45918	0.98514	-0.5983	0.95819	-0.16107	0.96203	0.22869	0.9374	0.84907	0.53899	2.3424	0.58569	0.92047	0.78481	2.7844	0.02072	-0.18953	0.91255	1.6122	0.61741	1.6515	0.3112
contig06184	---NA---	-0.6652	0.71545	1.4289	0.43078	-3.8044	0.0055611	-3.2936	0.016372	0.12548	0.94797	1.1687	0.37362	-0.091442	0.99997	-0.53505	0.81511	0.4233	0.46547	-0.16955	0.91309	-2.1968	0.17589	-0.59986	0.53776
contig06209	---NA---	0.53389	0.36088	-0.047173	0.99556	0.29883	0.89962	0.63312	0.19609	0.57199	0.2785	-0.14905	0.83133	-0.081617	0.99997	0.10621	0.94318	0.97275	0.0060232	0.55746	0.21125	0.064405	0.96036	0.38079	0.44012
contig06217	ANX13_HUMANRecName: Full=Annexin A13; AltName: Full=Annexin XIII; AltName: Full=Annexin-13; AltName: Full=Intestine-specific annexin; Short=ISA	0.74639	0.82538	-0.50034	0.9938	-0.52028	0.96522	-0.49247	0.88676	0.32911	0.93203	0.051991	0.98664	0.46101	0.99997	1.9127	0.49126	2.5406	0.038951	1.6728	0.32454	1.1806	0.7356	2.4509	0.19122
contig06219	---NA---	0.66886	0.077597	0.62932	0.21376	0.24242	0.88014	0.39304	0.30666	0.76846	0.039507	0.077632	0.88984	0.4663	0.71975	0.71919	0.060757	0.97763	0.00067979	0.71787	0.023643	0.34832	0.51066	0.52776	0.12113
contig06235	---NA---	1.1717	0.52022	0.22637	0.99454	-0.56913	0.9459	-0.22397	0.92978	0.52812	0.8195	0.10873	0.96206	-0.63255	0.99997	0.59433	0.83799	2.3605	0.013995	1.379	0.28316	0.59177	0.82134	1.4479	0.27005
contig06237	---NA---	1.457	0.41001	0.31787	0.9938	0.90024	0.89373	1.3425	0.40187	1.8492	0.22115	0.72072	0.68714	-0.32378	0.99997	-0.30356	0.94527	2.0705	0.037182	1.2112	0.39373	0.19907	0.95825	0.88261	0.56006
contig06242	BAAT_RATRecName: Full=Bile acid-CoA:amino acid N-acyltransferase; Short=BACAT; Short=BAT; AltName: Full=Glycine N-choloyltransferase; AltName: Full=Kan-1; AltName: Full=Long-chain fatty-acyl-CoA hydrolase	-0.52425	0.73123	-1.4782	0.316	-2.1427	0.022566	-1.9627	0.018103	-0.85026	0.42305	-1.9032	0.057123	-1.0489	0.85355	-1.2501	0.29129	-1.2977	0.043707	-1.4523	0.071172	-1.5915	0.18137	-1.0063	0.26081
contig06250	---NA---	0.5678	0.33766	0.37262	0.91138	0.58668	0.55115	0.9426	0.036708	0.58564	0.27656	0.55065	0.3253	0.23436	0.99997	0.081169	0.96316	0.74648	0.031804	0.58355	0.19678	0.11899	0.91916	0.069417	0.92306
contig06252	---NA---	0.5796	0.37821	0.31993	0.9585	0.55764	0.67648	0.98744	0.046144	0.56927	0.34278	0.54886	0.36955	0.41264	0.99997	0.38416	0.66411	0.79666	0.034908	0.58193	0.24824	0.30717	0.75344	0.24146	0.6951
contig06253	SL9A8_RATRecName: Full=Sodium/hydrogen exchanger 8; AltName: Full=Na(+)/H(+) exchanger 8; Short=NHE-8; AltName: Full=Solute carrier family 9 member 8	0.57879	0.80433	0.39865	0.99367	0.34708	0.97514	0.12482	0.96432	0.83151	0.61936	0.33513	0.85548	-0.032531	0.99997	-0.094194	0.98805	2.2809	0.015488	1.0163	0.42986	0.73233	0.74578	0.1522	0.92725
contig06295	---NA---	-0.41183	0.85714	-0.84828	0.91159	-0.26344	0.97429	0.51155	0.75931	0.28207	0.90175	-0.87741	0.50544	-0.17174	0.99997	0.89055	0.617	1.5881	0.044128	0.43271	0.75874	0.34503	0.88811	0.9081	0.42681
contig06301	---NA---	0.45405	0.82739	0.3436	0.99367	-0.67781	0.89489	-0.38989	0.82372	0.27345	0.91423	0.66731	0.60829	0.27426	0.99997	0.29572	0.92173	1.6287	0.031689	-0.14101	0.93217	-0.11986	0.96916	0.19071	0.89773
contig06304	CBR3_MOUSERecName: Full=Carbonyl reductase	1.9552	0.0075903	1.572	0.063832	1.3025	0.18865	1.8752	0.0050772	2.0998	0.0040673	1.2692	0.12604	1.6644	0.060744	1.8247	0.01357	2.6969	2.9045e-05	2.338	0.00038846	1.2177	0.2215	2.2609	0.0013622
contig06305	CBR1_MOUSERecName: Full=Carbonyl reductase [NADPH] 1; AltName: Full=15-hydroxyprostaglandin dehydrogenase	1.9908	6.9437e-07	1.924	6.4954e-07	1.4783	0.00012339	1.8049	1.8556e-06	2.1818	4.45e-08	1.5653	5.8622e-05	1.6744	2.8059e-05	1.8464	1.3944e-06	2.1739	2.6238e-08	2.3184	5.7643e-09	1.4447	0.00037674	1.895	1.1556e-06
contig06314	---NA---	1.1858	0.25428	0.42321	0.97923	1.0779	0.54605	1.1713	0.20094	0.41843	0.77006	-0.36941	0.75983	-0.22583	0.99997	1.1299	0.34739	1.2281	0.051898	1.6756	0.033309	1.1736	0.35029	1.3409	0.11564
contig06337	---NA---	0.24836	0.83591	0.5279	0.86143	-0.10566	0.98399	-0.3671	0.65179	0.86463	0.1825	0.68603	0.32052	-0.14173	0.99997	-0.50381	0.59215	1.1624	0.0084899	0.21406	0.78406	-0.3863	0.71971	-0.045218	0.95985
contig06338	ADH_SULACRecName: Full=NAD-dependent alcohol dehydrogenase	0.6312	0.75413	0.35627	0.9938	0.32536	0.96836	0.27463	0.89605	0.88908	0.54548	0.87398	0.52816	0.16053	0.99997	0.92078	0.61957	2.057	0.014086	0.12706	0.94567	-0.056425	0.98733	1.2789	0.26301
contig06340	FUCTA_DROMERecName: Full=Glycoprotein 3-alpha-L-fucosyltransferase A; AltName: Full=Core alpha-(1,3)-fucosyltransferase	0.30564	0.88734	0.31935	0.9938	1.9557	0.49784	2.1028	0.14514	-0.26757	0.93154	0.77381	0.56323	1.1615	0.99997	0.46198	0.92488	2.2329	0.040924	0.88102	0.60171	0.57272	0.83803	0.42987	0.81859
contig06370	PECR_PONABRecName: Full=Peroxisomal trans-2-enoyl-CoA reductase; Short=TERP	-0.025987	0.98805	-0.1241	0.9938	-0.028206	0.99635	0.82973	0.11951	0.083154	0.94797	-0.088447	0.92017	0.11074	0.99997	0.51322	0.52226	1.2694	0.002342	0.50056	0.35594	0.68284	0.37738	0.93498	0.070305
contig06389	---NA---	0.53956	0.66864	0.53806	0.94095	0.55079	0.87913	1.3339	0.083454	0.83772	0.35896	0.62025	0.5148	-0.34218	0.99997	0.59442	0.70489	1.242	0.030146	0.72539	0.36845	0.094252	0.96777	0.72862	0.4296
contig06391	---NA---	0.98125	0.45202	-0.015301	0.99864	1.8013	0.27879	2.0529	0.051628	0.9666	0.40115	1.3553	0.24291	-0.55572	0.99997	0.079476	0.98903	1.9966	0.014174	0.82416	0.42246	0.51852	0.81168	0.60531	0.62899
contig06398	FRMD5_MOUSERecName: Full=FERM domain-containing protein 5	0.25275	0.90023	0.75709	0.87588	0.039338	0.99794	1.1503	0.47679	0.10135	0.96162	0.66456	0.53675	2.6086	0.37562	2.9298	0.030051	2.3079	0.003271	0.91147	0.36621	2.3246	0.20529	2.0999	0.086729
contig06403	---NA---	-1.1181	0.26414	-2.1155	0.016817	-2.7793	0.00049293	-2.5274	0.00095577	-1.8133	0.04481	-1.8948	0.042872	-3.653	8.9357e-06	-3.5864	3.4769e-06	-2.0885	0.0017605	-3.0121	7.1897e-05	-2.691	0.0017785	-2.7671	0.00067546
contig06406	---NA---	0.47075	0.33805	0.031797	0.99654	-0.14534	0.95668	-0.092529	0.89997	0.90433	0.031828	0.21967	0.67183	0.00039352	0.99997	-0.16418	0.8625	0.71288	0.01483	0.24979	0.58239	-0.090594	0.9271	0.27031	0.53246
contig06421	---NA---	0.57585	0.18823	0.046575	0.99454	0.036972	0.99314	0.34898	0.44622	0.40058	0.36494	-0.35194	0.43638	-0.012112	0.99997	0.26178	0.69779	0.94525	0.0017605	0.58743	0.088461	-0.12245	0.88556	0.25858	0.53306
contig06427	ZDH15_XENLARecName: Full=Palmitoyltransferase ZDHHC15; AltName: Full=Zinc finger DHHC domain-containing protein 15 homolog; Short=DHHC-15	0.40482	0.68769	0.34725	0.96398	0.15231	0.97325	0.81377	0.20883	0.9268	0.17281	0.29291	0.72391	-0.011261	0.99997	0.049649	0.98774	1.4548	0.0024946	0.59296	0.34239	0.10076	0.95198	0.55057	0.3893
contig06455	PIGM_RATRecName: Full=GPI mannosyltransferase 1; AltName: Full=GPI mannosyltransferase I; Short=GPI-MT-I; AltName: Full=Phosphatidylinositol-glycan biosynthesis class M protein; Short=PIG-M	0.2842	0.68843	0.27292	0.95527	0.0045341	0.99885	0.058641	0.94511	0.7506	0.11672	-0.014807	0.98498	0.16894	0.99997	0.081912	0.95746	0.76339	0.016673	0.4095	0.35336	0.2212	0.7952	0.58006	0.17548
contig06467	PTSS2_MOUSERecName: Full=Phosphatidylserine synthase 2; Short=PSS-2; Short=PtdSer synthase 2; AltName: Full=Serine-exchange enzyme II	0.45049	0.78108	-0.05214	0.99726	-0.50206	0.92276	-0.187	0.90948	-0.18078	0.92677	-0.0044997	0.99741	-0.31954	0.99997	0.40079	0.83629	1.2992	0.04052	1.1919	0.13952	0.79105	0.56708	0.91027	0.3045
contig06481	---NA---	-0.41041	0.85109	-0.88068	0.9585	0.75113	0.93269	1.01	0.56119	-0.15996	0.94935	-1.4164	0.41218	0.97907	0.99997	0.058751	0.99432	2.5027	0.047217	2.9973	0.063782	0.99309	0.69581	0.25913	0.88927
contig06499	ZBED4_MOUSERecName: Full=Zinc finger BED domain-containing protein 4	0.63104	0.37164	-0.076995	0.99454	-0.11961	0.97904	-0.063123	0.95464	0.37499	0.63187	-0.038864	0.96961	0.090319	0.99997	0.34997	0.73491	1.0173	0.014128	0.41693	0.49763	0.15183	0.91089	0.68994	0.21446
contig06500	---NA---	0.30657	0.84496	-0.079796	0.99556	0.70805	0.82095	1.1368	0.2092	0.49653	0.64544	1.0166	0.26424	-0.062377	0.99997	-0.82553	0.57211	2.1932	0.0031544	0.71875	0.42496	-0.088927	0.97077	0.1076	0.93337
contig06503	---NA---	0.66019	0.20842	-0.052138	0.99516	0.55479	0.54524	1.0835	0.0092232	0.40289	0.46552	0.059121	0.9388	0.11941	0.99997	0.19202	0.85573	1.1608	0.001318	0.8711	0.031658	0.34439	0.65135	0.31221	0.52375
contig06506	---NA---	1.8383	0.023998	1.2208	0.37227	1.6066	0.07587	1.9121	0.0069706	1.437	0.087336	0.70254	0.44192	0.70137	0.99997	0.92251	0.39037	1.7828	0.0028056	2.1996	0.0018686	1.8226	0.044908	1.9734	0.0092876
contig06524	---NA---	0.85732	0.36979	0.1163	0.99454	0.22664	0.96659	0.29635	0.81351	0.16781	0.91985	0.069445	0.9588	-0.17132	0.99997	-0.24188	0.9064	1.6188	0.0051176	0.23187	0.82563	-0.90396	0.41424	-0.12895	0.90688
contig06539	KCNAS_DROMERecName: Full=Potassium voltage-gated channel protein Shaker; AltName: Full=Protein minisleep	0.057358	0.98457	-1.7565	0.58929	0.52456	0.93493	0.42124	0.7849	-1.0555	0.36209	-1.4844	0.34765	0.43654	0.99997	0.65783	0.85194	1.6083	0.045722	1.628	0.10797	0.56869	0.81974	1.1117	0.39182
contig06541	---NA---	0.39482	0.64995	-0.21376	0.98874	0.52575	0.75809	0.78084	0.17116	0.48794	0.47583	0.21849	0.78026	-0.32615	0.99997	-0.4633	0.60301	0.85955	0.033053	0.61318	0.25623	0.18559	0.88	0.37802	0.53252
contig06554	---NA---	1.3202	0.33318	0.79637	0.92842	0.31414	0.9688	0.035632	0.98823	0.33665	0.87761	1.4399	0.27104	1.1686	0.99997	1.4782	0.39039	2.0636	0.022877	1.3091	0.21372	0.77541	0.7593	0.96046	0.46211
contig06604	---NA---	-0.0076033	0.99773	-1.389	0.24624	-0.14955	0.98971	0.51823	0.75634	-0.79222	0.38409	-0.24818	0.82954	-0.92565	0.9873	-0.86368	0.55576	1.6513	0.011914	-0.015931	0.99281	0.122	0.96847	0.25701	0.81858
contig06652	---NA---	-0.33973	0.89404	-0.49362	0.98744	-0.9778	0.80149	0.35848	0.86906	0.22528	0.93638	-0.35603	0.83169	-2.4124	0.46499	0.066649	0.99089	2.315	0.0036924	0.21264	0.88622	-0.57608	0.81612	-0.15399	0.92787
contig06668	---NA---	-1.2667	0.15118	-2.1074	0.0091236	-0.79099	0.7162	-0.87935	0.30922	-0.059803	0.97462	-0.29681	0.78971	-1.6699	0.11568	-3.0468	2.2009e-05	-1.067	0.05863	-1.8505	0.010388	-1.4631	0.15994	-1.2557	0.098243
contig06677	---NA---	0.28812	0.88281	-0.10758	0.99454	1.1579	0.74876	2.4399	0.085978	-0.16439	0.93474	1.2414	0.28948	-1.6147	0.73721	-1.3041	0.53728	2.4604	0.0096001	1.5826	0.086018	-1.1282	0.5459	-1.3922	0.22182
contig06697	AT5G2_BOVINRecName: Full=ATP synthase F(0) complex subunit C2, mitochondrial; AltName: Full=ATP synthase lipid-binding protein; AltName: Full=ATP synthase membrane subunit c locus 2; AltName: Full=ATP synthase proteolipid P2; AltName: Full=ATPase protein 9; AltName: Full=ATPase subunit c; Flags: Precursor	-0.31166	0.8744	0.096844	0.99556	0.5177	0.93429	1.0321	0.37723	0.51129	0.70752	1.5539	0.13529	0.044579	0.99997	0.48607	0.79025	1.9281	0.0052707	0.57326	0.58173	0.41678	0.81978	0.40047	0.71309
contig06703	---NA---	0.026917	0.99227	0.15291	0.99454	-1.1735	0.57961	-0.34342	0.83773	0.020043	0.99443	0.45423	0.69495	0.60122	0.99997	0.3968	0.86846	1.606	0.026232	-0.076477	0.95944	-0.32829	0.88047	0.60095	0.58726
contig06749	---NA---	0.22931	0.89803	-0.12645	0.99454	0.44785	0.92276	0.8748	0.30988	0.077355	0.96728	-0.52008	0.59209	-0.005209	0.99997	0.49557	0.72803	1.3347	0.019808	1.5154	0.031389	0.5871	0.65943	0.28709	0.76909
contig06777	ACSL4_HUMANRecName: Full=Long-chain-fatty-acid--CoA ligase 4; AltName: Full=Arachidonate--CoA ligase; AltName: Full=Long-chain acyl-CoA synthetase 4; Short=LACS 4	0.75568	0.58139	0.72727	0.91138	-0.060474	0.99544	0.54614	0.7954	-0.090414	0.97689	0.42409	0.73544	-0.25943	0.99997	0.32461	0.92113	2.6262	0.0095669	-0.097849	0.94931	1.3088	0.44453	0.036113	0.9855
contig06784	---NA---	0.44282	0.43428	0.21138	0.97898	0.073938	0.98463	-0.25329	0.67525	0.37794	0.47666	-0.15669	0.80036	0.11262	0.99997	0.31448	0.66803	0.62899	0.043383	0.40451	0.35648	-0.025588	0.9837	0.33029	0.47072
contig06819	---NA---	0.47572	0.59703	-0.15319	0.9938	0.48702	0.83171	0.6092	0.38459	0.7233	0.29168	0.58966	0.41388	-0.27069	0.99997	-0.8072	0.33023	0.8733	0.046445	0.2919	0.69759	0.1865	0.89263	0.13236	0.87598
contig06822	---NA---	0.24263	0.71812	-0.32109	0.89808	-0.026108	0.99544	0.023559	0.97845	0.34291	0.48992	-0.47185	0.31127	-0.21	0.99997	0.083494	0.94904	0.66934	0.022109	0.21874	0.64682	0.13781	0.8742	0.55465	0.15817
contig06848	---NA---	0.59014	0.25399	0.15991	0.98981	0.037975	0.99458	0.51406	0.2743	0.43229	0.39791	-0.099791	0.88632	0.089399	0.99997	0.25728	0.75299	1.2994	0.00038894	0.73097	0.062384	0.1417	0.88421	0.3672	0.41817
contig06854	---NA---	0.57577	0.54154	0.43825	0.94625	0.69452	0.69267	1.2429	0.049761	0.55978	0.50106	0.25444	0.78702	0.232	0.99997	0.010396	0.99724	0.28508	0.55405	0.83253	0.18127	0.70888	0.47867	0.54165	0.43818
contig06865	---NA---	0.3376	0.65905	-0.21253	0.98162	-0.18616	0.95166	0.030447	0.97661	0.27465	0.70326	-0.099961	0.89832	-0.18139	0.99997	-0.20506	0.85643	0.90923	0.010995	0.4208	0.40223	0.020427	0.98901	0.26383	0.63516
contig06904	---NA---	0.79939	0.066982	0.040476	0.99556	0.12297	0.96522	0.0050174	0.99497	0.59108	0.17921	-0.27731	0.57687	-0.24734	0.99997	-0.10741	0.92833	0.86378	0.0046809	0.63037	0.083412	0.40795	0.50266	0.72638	0.063002
contig06925	---NA---	0.1772	0.95674	1.0828	0.7972	0.36005	0.97647	0.20419	0.92958	0.37506	0.87263	2.3775	0.094385	0.49965	0.99997	-0.51051	0.89803	2.4487	0.031312	0.21934	0.9259	-0.31651	0.91225	-0.95127	0.45149
contig06937	IYD1_PONABRecName: Full=Iodotyrosine deiodinase 1; Short=IYD-1; AltName: Full=Iodotyrosine dehalogenase 1; Flags: Precursor	0.29886	0.75203	0.11196	0.9938	-0.042233	0.99544	-0.093403	0.92831	0.2433	0.7847	-0.037452	0.96915	0.60485	0.89218	0.43936	0.6134	1.0391	0.0090857	0.39269	0.50306	0.35775	0.71236	0.9522	0.066845
contig06968	---NA---	0.36198	0.78443	-0.80621	0.71311	-0.15095	0.97904	-0.41647	0.67762	-0.016542	0.99421	-0.11522	0.92275	-0.65589	0.99997	-1.0059	0.2876	1.1132	0.031287	-0.18737	0.85383	-0.91523	0.37518	0.16129	0.87109
contig07019	---NA---	-0.47593	0.67295	-0.30683	0.98162	-0.4207	0.91122	0.45627	0.62784	0.30905	0.79468	-0.2192	0.83483	0.021535	0.99997	0.21352	0.91182	1.0699	0.035152	0.40777	0.62007	-0.44269	0.73149	0.01091	0.99232
contig07087	---NA---	0.18042	0.80429	0.020561	0.99792	0.5845	0.33191	0.95814	0.0057273	0.50494	0.22497	0.047425	0.9414	0.09227	0.99997	-0.018496	0.99185	0.92252	0.0019426	0.59773	0.079966	0.1869	0.80218	0.22493	0.59693
contig07213	MOB3B_HUMANRecName: Full=MOB kinase activator 3B; AltName: Full=Mob1 homolog 2b; AltName: Full=Mps one binder kinase activator-like 2B; Short=MOB kinase activator-like 2B	0.72975	0.3677	-0.10132	0.99454	0.01905	0.99794	0.21174	0.84975	0.92027	0.19244	0.39692	0.62818	-0.30018	0.99997	-0.45046	0.69145	1.0911	0.021143	0.3119	0.69582	-0.068105	0.96847	0.47004	0.50024
contig07215	---NA---	0.2127	0.80358	-0.21339	0.97982	0.02611	0.99576	0.51105	0.28914	0.58302	0.233	0.085173	0.90677	-0.086371	0.99997	-0.12225	0.92502	0.87835	0.0079353	0.40571	0.37125	0.16532	0.85985	0.38523	0.40089
contig07222	CP2R1_MOUSERecName: Full=Vitamin D 25-hydroxylase; AltName: Full=Cytochrome P450 2R1	6.3338	2.6492e-09	5.962	9.1392e-09	5.6832	2.0821e-08	5.8159	5.5441e-09	5.8113	8.8689e-09	5.0116	3.7866e-07	5.8549	2.1954e-08	6.8836	2.3643e-10	7.542	1.0302e-11	6.5739	3.5427e-10	4.9437	7.3915e-07	6.1064	4.1616e-09
contig07224	---NA---	1.2852	0.040639	0.77643	0.55991	0.93094	0.29948	1.4862	0.0054098	1.1255	0.073844	0.47056	0.50128	0.43587	0.99997	0.89866	0.22838	1.7634	0.00032825	1.3648	0.0105	0.43694	0.65936	0.79885	0.16098
contig07231	---NA---	1.9428	0.35377	0.389	0.9938	0.10543	0.99551	0.65235	0.814	1.6037	0.42421	0.5804	0.81277	-0.16931	0.99997	0.33721	0.95294	2.4088	0.047352	1.1941	0.52099	0.21754	0.96264	1.2956	0.46773
contig07254	---NA---	-0.88293	0.44178	-0.93194	0.74955	-0.90322	0.69523	-0.84237	0.40952	-1.3474	0.15885	-0.68228	0.51675	-1.5938	0.26851	-0.75697	0.57925	-1.539	0.016025	-1.424	0.069816	-0.93317	0.47583	-0.98567	0.2585
contig07261	LIAS_XENLARecName: Full=Lipoyl synthase, mitochondrial; AltName: Full=Lipoate synthase; Short=LS; Short=Lip-syn; AltName: Full=Lipoic acid synthase	0.93789	0.32505	0.86924	0.71909	0.56163	0.87552	0.85833	0.31862	1.2966	0.12958	0.61963	0.50902	0.083165	0.99997	-0.69816	0.55881	1.7796	0.0030685	0.95986	0.18878	-0.13275	0.94967	0.2459	0.806
contig07268	FRIS_LYMSTRecName: Full=Soma ferritin	0.35368	0.83355	-0.61981	0.92601	-0.17786	0.97904	0.033214	0.98545	-0.010863	0.99735	-0.41198	0.71125	-0.29004	0.99997	0.70743	0.59421	1.2171	0.043869	0.9771	0.22002	0.46973	0.76473	1.1497	0.1617
contig07269	OAZ1_XENLARecName: Full=Ornithine decarboxylase antizyme 1; Short=ODC-Az	0.67793	0.32051	0.30544	0.96983	0.49674	0.78996	1.0073	0.059634	1.0833	0.073539	0.053113	0.95638	0.15386	0.99997	0.4677	0.59873	1.5191	0.00083782	0.99652	0.047717	0.30323	0.776	0.7428	0.17712
contig07277	CRNL1_HUMANRecName: Full=Crooked neck-like protein 1; AltName: Full=Crooked neck homolog; Short=hCrn	0.33076	0.82791	0.31496	0.98482	-0.36377	0.93599	0.35852	0.75723	0.53113	0.60849	-0.41955	0.67223	-0.51135	0.99997	-0.16022	0.94827	1.3748	0.014279	1.4253	0.037739	1.1918	0.25786	0.99997	0.18406
contig07286	SOX_BOVINRecName: Full=Peroxisomal sarcosine oxidase; Short=PSO; AltName: Full=L-pipecolate oxidase; AltName: Full=L-pipecolic acid oxidase	-0.073893	0.98671	-1.1203	0.89808	-0.76245	0.95091	-0.050458	0.98715	-0.7657	0.75849	-0.49149	0.80738	1.1366	0.99997	1.1668	0.60047	2.413	0.019417	0.19007	0.93164	0.16797	0.96718	0.90562	0.55492
contig07287	VWA2_HUMANRecName: Full=von Willebrand factor A domain-containing protein 2; AltName: Full=A domain-containing protein matrilin and collagen; Short=AMACO; AltName: Full=Colon cancer secreted protein 2; Short=CCSP-2; Flags: Precursor	1.4107	0.049937	0.27742	0.98482	0.78516	0.58685	1.2915	0.04025	0.87213	0.23688	0.59073	0.45612	-0.43616	0.99997	-0.64712	0.51572	1.3602	0.0066242	0.90644	0.13926	-0.033869	0.98693	0.22735	0.78886
contig07289	TOX3_MOUSERecName: Full=TOX high mobility group box family member 3; AltName: Full=Trinucleotide repeat-containing gene 9 protein	-1.4539	0.048526	-0.3194	0.98049	0.58484	0.84495	0.85194	0.30215	0.23105	0.85568	-0.64556	0.41701	0.36555	0.99997	-0.24055	0.90497	0.88446	0.18998	0.30619	0.71494	0.12093	0.94476	0.34688	0.65589
contig07307	---NA---	-0.42073	0.83581	0.21671	0.9938	-0.59759	0.93176	-0.47504	0.78938	-0.29899	0.88202	-0.46114	0.73246	0.61679	0.99997	-0.13265	0.97476	2.5034	0.017102	0.36342	0.78326	0.16442	0.9578	0.12332	0.93484
contig07308	ZCHC4_HUMANRecName: Full=rRNA N6-adenosine-methyltransferase ZCCHC4; AltName: Full=Zinc finger CCHC domain-containing protein 4	0.49615	0.68494	-0.2862	0.98874	0.37232	0.93429	0.50619	0.614	-0.42939	0.70007	-0.76459	0.38799	-0.056849	0.99997	-0.61732	0.61326	1.3786	0.024958	0.93073	0.1881	0.41773	0.768	0.6409	0.41224
contig07311	PSDE_HUMANRecName: Full=26S proteasome non-ATPase regulatory subunit 14; AltName: Full=26S proteasome regulatory subunit RPN11; AltName: Full=26S proteasome-associated PAD1 homolog 1	0.62412	0.57901	0.3856	0.97898	-0.75133	0.73807	-0.8161	0.34743	0.12057	0.94797	-0.046168	0.97346	0.39402	0.99997	0.014192	0.99684	1.3527	0.016728	0.76438	0.3214	-0.56492	0.67039	0.40324	0.65136
contig07317	TOPRS_DROMERecName: Full=E3 ubiquitin-protein ligase Topors; AltName: Full=RING-type E3 ubiquitin transferase Topors; AltName: Full=SUMO1-protein E3 ligase Topors; AltName: Full=Topoisomerase I-binding RING finger protein; AltName: Full=Topoisomerase I-binding arginine/serine-rich protein; AltName: Full=dTopors	-0.041876	0.98273	-0.42262	0.94517	-0.22068	0.9586	-0.31519	0.74077	0.38099	0.68116	0.55152	0.46755	-0.12887	0.99997	-0.49329	0.64104	1.0289	0.02635	-0.39634	0.58663	-0.57101	0.57043	0.020343	0.9855
contig07321	CD63_FELCARecName: Full=CD63 antigen; AltName: CD_antigen=CD63	0.66301	0.30291	-0.042164	0.99654	0.40522	0.84917	0.59582	0.30953	0.71856	0.21979	0.16628	0.83499	-0.14891	0.99997	-0.2933	0.7795	0.77111	0.044727	0.46837	0.39545	-0.059683	0.96632	0.14297	0.84006
contig07338	SRPRB_MOUSERecName: Full=Signal recognition particle receptor subunit beta; Short=SR-beta	0.36753	0.85364	0.82636	0.87366	-0.11394	0.99513	0.59143	0.78099	0.31378	0.86621	-0.149	0.93479	0.20893	0.99997	0.3649	0.89661	1.7146	0.029002	1.158	0.20316	0.74098	0.69693	1.2473	0.24392
contig07343	---NA---	0.764	0.35821	-0.17845	0.9938	0.69213	0.69528	0.80406	0.26355	0.61924	0.44317	0.076983	0.94691	-0.42376	0.99997	-0.1429	0.94743	1.5898	0.0023603	0.85218	0.17096	0.12838	0.9412	0.72235	0.28247
contig07344	---NA---	0.54613	0.39319	-0.1603	0.9938	0.55176	0.66513	0.63679	0.23387	0.37579	0.56874	-0.14062	0.85465	-0.29026	0.99997	0.045389	0.98553	1.1715	0.0026902	0.71433	0.11864	0.24157	0.80924	0.75094	0.12523
contig07353	SEPIA_DROMERecName: Full=Pyrimidodiazepine synthase; AltName: Full=Protein sepia	0.77521	0.18489	0.25814	0.97809	0.51821	0.7077	0.37445	0.56911	0.93624	0.092218	0.19496	0.78702	-0.15216	0.99997	0.10555	0.94976	0.78612	0.033372	0.89791	0.050484	0.50897	0.50989	0.76556	0.12323
contig07359	BYST_BOVINRecName: Full=Bystin	0.59061	0.58496	-0.30696	0.98482	0.32404	0.94551	0.57935	0.53476	0.63884	0.48332	0.24068	0.8252	-0.38198	0.99997	-0.62377	0.5935	1.4199	0.0093664	0.43509	0.61176	-0.00062761	0.99966	0.33036	0.70608
contig07365	---NA---	-0.13229	0.96687	-0.46864	0.98162	0.45315	0.94661	-0.99939	0.43122	-0.46249	0.8	-0.11688	0.95002	-0.30322	0.99997	-0.54943	0.83432	-1.9463	0.025558	-2.1026	0.029481	0.10551	0.97323	0.23844	0.88665
contig07367	EXOS1_MOUSERecName: Full=Exosome complex component CSL4; AltName: Full=Exosome component 1	0.5522	0.43125	0.25538	0.98049	0.2084	0.95026	0.62344	0.28326	0.94838	0.10775	0.34934	0.59984	-0.14366	0.99997	-0.44697	0.60138	0.93065	0.017742	0.45847	0.41066	0.068921	0.9628	0.41084	0.46926
contig07368	---NA---	0.63649	0.3265	0.66589	0.62852	0.85061	0.29699	1.1722	0.017425	0.6897	0.23808	0.50542	0.41924	0.86974	0.4072	0.95492	0.12384	1.0563	0.0075464	1.3256	0.0067942	0.48367	0.5608	0.77953	0.12968
contig07376	PPIA_BLAGERecName: Full=Peptidyl-prolyl cis-trans isomerase; Short=PPIase; AltName: Full=Cyclophilin; AltName: Full=Cyclosporin A-binding protein; AltName: Full=Rotamase	0.43621	0.61553	-0.023883	0.99792	0.44635	0.8455	1.0778	0.050278	0.55821	0.41534	-0.11185	0.90622	-0.054669	0.99997	0.14483	0.93435	0.92882	0.027279	0.76182	0.15415	0.41919	0.67742	1.1587	0.038917
contig07379	---NA---	0.4776	0.70987	-0.1165	0.99454	-0.43597	0.92409	-0.24006	0.859	0.28897	0.83724	-0.46319	0.63862	0.98596	0.78056	1.197	0.22728	1.3905	0.0144	0.98055	0.17287	0.48044	0.73615	0.8167	0.29357
contig07387	FABPH_ONCMYRecName: Full=Fatty acid-binding protein, heart; AltName: Full=Fatty acid-binding protein 3; AltName: Full=Heart-type fatty acid-binding protein; Short=H-FABP	0.95861	0.58618	0.0058226	0.99948	0.25199	0.97955	0.38667	0.85283	0.97992	0.51833	-0.49205	0.76906	-0.16213	0.99997	0.86874	0.67194	1.7353	0.045188	1.3076	0.26481	0.24157	0.93812	1.4385	0.22657
contig07388	---NA---	0.55537	0.71109	0.09031	0.99556	0.32987	0.95606	0.5416	0.66439	0.61901	0.61575	-0.44179	0.71235	-0.05382	0.99997	0.82769	0.54592	1.4381	0.027956	1.1156	0.18612	0.35315	0.8531	1.2729	0.14909
contig07394	HPGDS_CHICKRecName: Full=Hematopoietic prostaglandin D synthase; Short=H-PGDS; AltName: Full=GST class-sigma; AltName: Full=Glutathione S-transferase; AltName: Full=Glutathione-dependent PGD synthase; AltName: Full=Glutathione-requiring prostaglandin D synthase; AltName: Full=Prostaglandin-H2 D-isomerase	0.9387	0.097078	0.74224	0.47849	0.42738	0.81814	0.96963	0.04774	1.1748	0.031657	0.78722	0.19091	0.68722	0.71975	0.76268	0.25646	1.2459	0.0021037	1.0797	0.021248	0.63569	0.3946	0.68466	0.17784
contig07414	---NA---	0.63926	0.71767	-0.39617	0.98942	0.42969	0.94794	0.67969	0.63135	0.45464	0.80184	-0.44947	0.75568	0.23436	0.99997	1.3758	0.34103	2.0407	0.0091765	1.5935	0.095284	1.0386	0.51526	2.2579	0.027667
contig07416	ELP4_XENLARecName: Full=Elongator complex protein 4	-0.50592	0.84776	-0.28222	0.9938	-0.13206	0.99247	-0.43505	0.84162	0.6562	0.74394	1.3196	0.38371	-0.6974	0.99997	-0.23407	0.96352	2.4713	0.038316	1.1031	0.4099	-0.22187	0.94799	-0.53815	0.72822
contig07421	H33_RATRecName: Full=Histone H3.3	0.086078	0.93794	-0.52015	0.66042	0.026276	0.99566	0.28729	0.61534	0.16478	0.83195	-0.098294	0.88632	0.087884	0.99997	-0.30789	0.6758	0.60887	0.048904	0.27625	0.57068	0.2591	0.74553	0.63771	0.12604
contig07424	---NA---	1.2526	0.10661	0.84481	0.6712	0.0099491	0.99857	0.35658	0.73355	0.11289	0.94668	0.52093	0.54501	0.75806	0.93789	0.57299	0.61744	1.1771	0.039208	0.89791	0.17174	0.41306	0.75449	0.60047	0.41223
contig07431	RLA0_RANSYRecName: Full=60S acidic ribosomal protein P0; AltName: Full=60S ribosomal protein L10E	0.51667	0.41385	0.2957	0.9585	0.18454	0.95342	0.75088	0.1258	0.79299	0.13979	-0.21821	0.74155	0.2829	0.99997	0.57152	0.40368	0.77158	0.029893	0.67824	0.13008	0.031908	0.98192	0.35318	0.50333
contig07440	RL34_AEDALRecName: Full=60S ribosomal protein L34; AltName: Full=L31	0.32112	0.63279	0.014571	0.99792	0.23843	0.92831	0.50548	0.28993	0.31591	0.59126	-0.45481	0.3775	0.017051	0.99997	0.20432	0.83163	0.51409	0.10049	0.67143	0.091085	0.85454	0.14258	1.0331	0.015994
contig07441	UBA5_BOVINRecName: Full=Ubiquitin-like modifier-activating enzyme 5; Short=Ubiquitin-activating enzyme 5; AltName: Full=UFM1-activating enzyme; AltName: Full=Ubiquitin-activating enzyme E1 domain-containing protein 1	0.10758	0.94908	-0.40968	0.94583	0.026148	0.99725	-0.15167	0.89424	-0.27411	0.79456	-0.73794	0.30899	-0.41212	0.99997	-0.053574	0.98682	1.3018	0.0055965	0.54667	0.39556	0.37539	0.74553	0.32213	0.65505
contig07445	GST1_ASCSURecName: Full=Glutathione S-transferase 1; AltName: Full=GST class-sigma	1.6054	0.074273	0.94401	0.69632	-0.013936	0.99857	-0.054253	0.98232	1.9137	0.031279	1.6934	0.068213	1.6639	0.70555	1.6314	0.29129	0.60286	0.46467	0.28828	0.78942	1.4398	0.39088	1.9176	0.089038
contig07450	NDUB2_PONPYRecName: Full=NADH dehydrogenase	0.56782	0.67132	0.39348	0.98049	0.49356	0.93239	1.8013	0.041315	0.026679	0.99037	0.46671	0.66718	0.03057	0.99997	0.42879	0.80322	1.2847	0.033754	0.62335	0.49176	0.67841	0.62328	1.5966	0.049209
contig07462	MYDGF_MOUSERecName: Full=Myeloid-derived growth factor; Short=MYDGF; Flags: Precursor	0.45515	0.38969	-0.31431	0.9224	0.38304	0.77428	0.46754	0.30786	0.59597	0.19048	-0.045227	0.95049	-0.31169	0.99997	-0.47926	0.4144	0.70993	0.01988	0.48855	0.21801	0.22989	0.77009	0.46731	0.26406
contig07467	RS3AB_XENLARecName: Full=40S ribosomal protein S3a-B	0.3678	0.65175	0.0051248	0.9994	0.086629	0.98526	0.49538	0.4217	0.35129	0.62463	-0.44213	0.47628	0.080814	0.99997	0.68647	0.33483	0.78629	0.036864	0.61602	0.21275	-0.23621	0.82066	0.40365	0.46356
contig07468	RS3A_DANRERecName: Full=40S ribosomal protein S3a	0.66014	0.19936	0.039358	0.9957	0.15684	0.9583	0.49111	0.32045	0.63923	0.19039	-0.15802	0.80679	-0.08438	0.99997	0.40672	0.55138	1.0752	0.0021489	0.76217	0.05775	-0.15551	0.87272	0.45076	0.31979
contig07476	---NA---	-0.14449	0.92812	-1.4506	0.048562	-0.726	0.63707	-0.46466	0.57922	-1.0006	0.1582	-1.3253	0.063958	-0.38483	0.99997	-0.97322	0.24596	0.056823	0.91026	-0.61679	0.34375	-1.0925	0.21304	-0.51996	0.44194
contig07496	---NA---	0.44737	0.32158	0.51144	0.52094	0.51379	0.43559	0.7678	0.026425	0.66448	0.099642	0.13228	0.80339	0.26055	0.99997	0.2819	0.64628	0.61318	0.022816	0.71621	0.03084	0.26919	0.67381	0.24098	0.5525
contig07509	SCP_PERVTRecName: Full=Sarcoplasmic calcium-binding protein; Short=SCP	-0.26338	0.91486	-0.66347	0.95098	-0.19704	0.98208	0.16566	0.93472	0.43765	0.80592	-0.13438	0.93943	0.33753	0.99997	1.6817	0.19097	1.5987	0.032272	0.61994	0.60419	0.8176	0.63406	1.5642	0.11836
contig07515	FAHD1_BOVINRecName: Full=Acylpyruvase FAHD1, mitochondrial; AltName: Full=Fumarylacetoacetate hydrolase domain-containing protein 1; AltName: Full=Oxaloacetate decarboxylase; Short=OAA decarboxylase; Flags: Precursor	0.093852	0.92608	0.16224	0.98865	0.22859	0.92539	0.86612	0.02445	0.58005	0.1978	0.2512	0.63038	0.38347	0.99997	0.38854	0.53311	0.4002	0.1707	0.46846	0.23606	0.55828	0.34132	0.73769	0.064679
contig07516	FAHD1_DICDIRecName: Full=Acylpyruvase FAHD1, mitochondrial; AltName: Full=Fumarylacetoacetate hydrolase domain-containing protein 1; Flags: Precursor	0.36644	0.56269	0.37218	0.87919	-0.089562	0.98025	0.45357	0.36399	0.37035	0.49922	0.47952	0.35172	0.43214	0.97994	0.041588	0.98466	0.93479	0.0050168	0.54463	0.18576	0.24459	0.76678	-0.094416	0.8776
contig07530	---NA---	0.21209	0.93742	-0.75568	0.97744	-1.0971	0.76958	-0.82034	0.59765	0.7579	0.64886	1.742	0.21667	1.5481	0.98613	1.421	0.44417	3.0834	0.0078353	1.1574	0.33199	1.5772	0.35939	1.7433	0.1371
contig07534	UB2L3_HUMANRecName: Full=Ubiquitin-conjugating enzyme E2 L3; AltName: Full=E2 ubiquitin-conjugating enzyme L3; AltName: Full=L-UBC; AltName: Full=UbcH7; AltName: Full=Ubiquitin carrier protein L3; AltName: Full=Ubiquitin-conjugating enzyme E2-F1; AltName: Full=Ubiquitin-protein ligase L3	0.25371	0.84471	-0.12765	0.9938	-0.87329	0.44676	-0.77955	0.24666	-0.15842	0.90652	-0.45989	0.55223	-0.30303	0.99997	0.021778	0.99459	1.0527	0.022587	0.41945	0.55655	-0.062888	0.96989	0.23027	0.77165
contig07538	CDPK3_ARATHRecName: Full=Calcium-dependent protein kinase 3; AltName: Full=Calcium-dependent protein kinase isoform CDPK6; Short=AtCDPK6	0.97155	0.098839	0.74144	0.52094	0.44125	0.82148	1.1761	0.018159	0.70527	0.23259	0.25637	0.7202	0.6865	0.77507	0.65662	0.37224	1.2207	0.003138	1.2307	0.012253	0.6824	0.37973	0.60841	0.2562
contig07545	---NA---	0.38622	0.65649	-0.098381	0.99454	-0.044067	0.99529	0.2028	0.82747	0.95827	0.11439	0.33372	0.63403	-0.13509	0.99997	-0.46983	0.59033	0.89644	0.025375	0.51034	0.36396	-0.22773	0.84131	0.34719	0.56927
contig07546	---NA---	0.5966	0.50127	0.017723	0.99806	0.20655	0.96331	0.58281	0.45145	1.0205	0.14943	0.54666	0.47535	-0.29729	0.99997	-0.8153	0.35458	1.1713	0.013275	0.63588	0.32297	-0.077279	0.96537	0.49062	0.47221
contig07559	IMA4_HUMANRecName: Full=Importin subunit alpha-4; AltName: Full=Importin alpha Q2; Short=Qip2; AltName: Full=Karyopherin subunit alpha-3; AltName: Full=SRP1-gamma	-0.11475	0.95663	-0.50629	0.94583	-1.5388	0.095698	-0.82521	0.33536	-0.029749	0.98866	0.93108	0.29986	0.22153	0.99997	-0.010425	0.99778	1.3374	0.017276	0.12636	0.91421	-0.5051	0.71608	0.22017	0.82562
contig07562	RL21_HUMANRecName: Full=60S ribosomal protein L21; AltName: Full=Large ribosomal subunit protein eL21	0.58345	0.35785	-0.19325	0.98931	0.16568	0.96275	0.56998	0.30996	0.4068	0.53301	-0.59496	0.31693	-0.089558	0.99997	0.31677	0.73455	1.209	0.0023859	1.46	0.0017858	0.79636	0.25834	1.2888	0.010112
contig07568	---NA---	0.82083	0.26803	0.55373	0.86143	0.30897	0.93429	0.44178	0.58649	0.72283	0.30611	0.24801	0.77689	0.59642	0.98924	0.59716	0.52368	1.1578	0.011697	0.62211	0.31532	0.1895	0.89392	0.59722	0.3486
contig07570	RS28_ICTPURecName: Full=40S ribosomal protein S28	0.8247	0.13086	0.64262	0.57903	0.72885	0.37298	0.79727	0.099319	0.86703	0.10818	0.23532	0.71944	0.17826	0.99997	0.098065	0.95316	0.66258	0.060091	1.1285	0.012124	0.454	0.55223	0.57456	0.23906
contig07571	---NA---	0.37355	0.95149	-0.046773	0.99864	0.14468	0.99544	0.51556	0.90257	0.087945	0.98866	-0.65308	0.84885	-0.48816	0.99997	-0.040726	0.99719	3.8823	0.019461	0.59641	0.85377	-0.25183	0.96991	0.20961	0.95656
contig07581	---NA---	0.17165	0.93052	0.039183	0.99792	0.53933	0.88547	1.0634	0.19481	-0.070108	0.97102	-0.93681	0.30801	0.37905	0.99997	0.40562	0.80274	1.5533	0.0082108	1.219	0.08726	1.3153	0.22153	1.3929	0.067986
contig07587	ATPO_DROMERecName: Full=ATP synthase subunit O, mitochondrial; AltName: Full=Oligomycin sensitivity conferral protein; Short=OSCP; Flags: Precursor	0.52658	0.51746	0.36912	0.95197	0.72751	0.53738	1.0326	0.06587	0.57657	0.39951	-0.55805	0.41814	0.34873	0.99997	1.2626	0.040238	0.6967	0.094048	0.91977	0.08084	0.32629	0.76608	0.88133	0.12025
contig07605	---NA---	-0.18763	0.86311	-0.15798	0.9938	0.4259	0.82252	1.3157	0.0057377	0.50167	0.41334	-0.17033	0.82372	0.3593	0.99997	0.32264	0.73401	0.1265	0.74229	0.52315	0.31009	0.73301	0.31678	0.69463	0.17351
contig07628	---NA---	0.41629	0.7299	-0.27651	0.98865	0.40602	0.92203	0.94022	0.20175	0.13415	0.93329	-0.3446	0.71394	-0.038463	0.99997	0.24934	0.89156	1.4412	0.0065691	0.792	0.24441	0.25829	0.86329	0.36025	0.66062
contig07657	S13A3_MOUSERecName: Full=Solute carrier family 13 member 3; AltName: Full=Na(+)/dicarboxylate cotransporter 3; Short=NaDC-3; Short=mNaDC3; AltName: Full=Sodium-dependent high-affinity dicarboxylate transporter 2	1.4209	0.048471	1.0438	0.37686	0.33748	0.93429	0.45329	0.60754	0.6821	0.37856	-0.24878	0.79208	0.02656	0.99997	0.81862	0.37012	1.27	0.010001	0.80358	0.20085	0.095789	0.95856	0.5918	0.38996
contig07662	---NA---	0.61465	0.5226	-0.30963	0.98162	-0.57112	0.81699	-0.31422	0.76653	0.2056	0.88112	-0.45695	0.592	-0.08057	0.99997	0.53651	0.63668	1.1698	0.01986	0.59111	0.40863	0.1169	0.94967	0.69804	0.3169
contig07663	---NA---	0.36053	0.61398	0.62749	0.57268	0.77626	0.28099	0.90131	0.046239	0.28346	0.68225	0.55815	0.31475	0.35619	0.99997	0.43249	0.5538	0.69797	0.042504	0.55097	0.22615	0.026774	0.98487	0.31541	0.545
contig07670	KLF10_HUMANRecName: Full=Krueppel-like factor 10; AltName: Full=EGR-alpha; AltName: Full=Transforming growth factor-beta-inducible early growth response protein 1; Short=TGFB-inducible early growth response protein 1; Short=TIEG-1	0.47456	0.68435	0.1536	0.9938	-0.10258	0.98912	-0.16449	0.90185	0.15559	0.92138	-0.014135	0.99032	-0.43476	0.99997	-0.22093	0.91059	1.1912	0.022991	-0.34526	0.69652	-0.90554	0.38271	-0.27762	0.75443
contig07677	---NA---	-0.017858	0.99237	-0.2801	0.98063	0.28049	0.93953	0.19863	0.84711	0.62268	0.369	-0.49511	0.48728	0.099206	0.99997	0.68608	0.4144	0.1846	0.67366	0.52373	0.39722	0.14766	0.91948	1.1391	0.049303
contig07680	---NA---	-0.35832	0.7814	-0.42678	0.9585	-0.58708	0.8544	0.27359	0.83642	-0.63676	0.45388	0.56893	0.49919	-0.7381	0.99997	-1.4581	0.1659	1.0104	0.04585	0.37091	0.65723	-0.1613	0.93581	0.019733	0.98779
contig07722	---NA---	0.70302	0.70278	0.51169	0.98162	0.45551	0.94794	1.9622	0.068681	1.084	0.41022	-0.0009098	0.99973	-0.025577	0.99997	0.98462	0.56897	1.6055	0.046072	1.4731	0.15297	0.50436	0.82181	1.2657	0.25737
contig07723	---NA---	0.35481	0.80922	-0.1229	0.99454	0.052293	0.99544	0.80045	0.34792	0.26779	0.85069	-0.65027	0.47142	-0.018049	0.99997	0.70258	0.54323	1.2339	0.025235	0.86535	0.2335	0.11252	0.95691	0.73927	0.33822
contig07737	---NA---	0.047664	0.98963	-1.1085	0.819	0.66337	0.95093	0.047465	0.98953	0.0050822	0.99917	0.62245	0.67687	0.68377	0.99997	0.25353	0.95368	1.8023	0.031406	-0.043186	0.98436	0.35186	0.90771	0.6441	0.66576
contig07746	---NA---	0.19866	0.9669	0.2189	0.99454	-1.2997	0.93092	-0.62401	0.83848	-0.39812	0.90807	-0.17722	0.96478	-0.69096	0.99997	-0.13785	0.98884	4.4695	0.0046858	1.0061	0.6754	0.027383	0.99482	-1.4643	0.4425
contig07748	---NA---	-0.064364	0.95585	-0.092876	0.9938	0.13618	0.96346	0.57609	0.19099	0.22	0.73989	-0.06861	0.92268	0.067832	0.99997	-0.006915	0.99719	0.69061	0.025279	0.42398	0.31548	0.43744	0.4927	0.31666	0.48674
contig07766	RL30_SPOFRRecName: Full=60S ribosomal protein L30	-0.30156	0.68291	0.18292	0.98744	0.34276	0.85248	0.90626	0.033473	0.47467	0.36856	0.098358	0.89333	0.28866	0.99997	-0.15502	0.89684	0.66545	0.042591	0.75746	0.064621	0.98636	0.080081	0.77349	0.078754
contig07807	---NA---	0.94075	0.12467	-0.076177	0.99454	-0.31446	0.92363	-0.76422	0.17985	0.29173	0.73289	0.53221	0.41451	0.60664	0.91454	0.6589	0.39039	0.97143	0.016447	0.74123	0.1445	0.17875	0.88473	0.15027	0.83772
contig07810	PDIA1_CHICKRecName: Full=Protein disulfide-isomerase; Short=PDI; AltName: Full=Cellular thyroid hormone-binding protein; AltName: Full=Prolyl 4-hydroxylase subunit beta; AltName: Full=Retina cognin; Short=R-cognin; Flags: Precursor	0.54466	0.3052	0.060591	0.99454	-0.070221	0.98652	0.42632	0.40648	-0.20881	0.77042	-0.02432	0.97531	0.080061	0.99997	0.49887	0.42041	0.68695	0.030861	0.74333	0.059753	1.0274	0.047328	1.1135	0.009743
contig07819	EIF3A_XENLARecName: Full=Eukaryotic translation initiation factor 3 subunit A; Short=eIF3a; AltName: Full=Eukaryotic translation initiation factor 3 subunit 10; AltName: Full=eIF-3-theta	0.78032	0.07016	0.42889	0.74549	0.12978	0.96275	0.38665	0.407	0.66309	0.12958	-0.15275	0.78607	0.18145	0.99997	0.4135	0.47453	1.0897	0.0008168	0.80016	0.026316	0.70482	0.18866	0.98109	0.012168
contig07822	CDIPT_MOUSERecName: Full=CDP-diacylglycerol--inositol 3-phosphatidyltransferase; AltName: Full=Phosphatidylinositol synthase; Short=PI synthase; Short=PtdIns synthase	1.1152	0.3265	-0.53459	0.95957	0.16472	0.98404	0.33697	0.82972	0.22759	0.90889	-0.037091	0.98244	-0.32763	0.99997	-0.6652	0.6758	1.623	0.016993	1.1206	0.20041	0.34576	0.85985	0.85686	0.36968
contig07834	---NA---	0.64727	0.43621	0.26442	0.98482	0.44193	0.87913	0.78142	0.24562	0.84605	0.22505	0.54934	0.46673	-0.41699	0.99997	-0.50943	0.62213	1.1434	0.014014	0.7724	0.19418	0.20518	0.88473	0.3801	0.59335
contig07836	MMP14_HUMANRecName: Full=Matrix metalloproteinase-14; Short=MMP-14; AltName: Full=MMP-X1; AltName: Full=Membrane-type matrix metalloproteinase 1; Short=MT-MMP 1; Short=MTMMP1; AltName: Full=Membrane-type-1 matrix metalloproteinase; Short=MT1-MMP; Short=MT1MMP; Flags: Precursor	0.88785	0.63458	-0.066878	0.9977	-0.84597	0.90441	-0.73977	0.70504	-0.13827	0.96205	0.3743	0.89219	-1.034	0.99997	-0.62846	0.83353	5.6776	0.00039095	1.4848	0.26617	0.085651	0.97937	0.4609	0.75963
contig07837	PRP6_RATRecName: Full=Pre-mRNA-processing factor 6; AltName: Full=PRP6 homolog; AltName: Full=U5 snRNP-associated 102 kDa protein; Short=U5-102 kDa protein	0.58668	0.79897	-0.18287	0.99454	-0.10208	0.99544	-0.63952	0.75332	-0.41393	0.87631	0.1405	0.94574	0.51135	0.99997	0.26268	0.94575	2.126	0.030393	-0.22535	0.9127	0.32646	0.9207	0.20425	0.90574
contig07839	ARF4_XENLARecName: Full=ADP-ribosylation factor 4	0.28048	0.7946	-0.43828	0.91159	0.24347	0.94592	0.45607	0.52036	0.088621	0.94797	-0.45805	0.50173	-0.12928	0.99997	0.0077912	0.99768	0.84565	0.038912	0.47794	0.41966	0.29206	0.79117	0.60041	0.29214
contig07850	---NA---	-0.40694	0.87273	0.74166	0.95833	-1.1161	0.77841	0.3274	0.87635	1.7501	0.2186	0.30686	0.8654	-0.67977	0.99997	0.34504	0.93349	2.1624	0.027035	0.87745	0.57845	-1.1534	0.54442	-1.3503	0.35475
contig07855	MYO6_HUMANRecName: Full=Unconventional myosin-VI; AltName: Full=Unconventional myosin-6	0.60865	0.24896	0.74468	0.3004	0.046148	0.99239	0.48746	0.32307	0.60962	0.21219	0.35685	0.50551	-0.0076455	0.99997	0.21717	0.81771	0.79676	0.014867	0.71442	0.075275	0.19055	0.83342	0.24614	0.62899
contig07860	---NA---	0.79795	0.13575	0.64161	0.55843	0.59471	0.54078	0.5456	0.29728	0.98549	0.05597	0.412	0.47042	0.36067	0.99997	0.36107	0.6524	1.2793	0.00099926	0.86517	0.044902	0.34359	0.68263	0.47227	0.33197
contig07867	1433E_HUMANRecName: Full=14-3-3 protein epsilon; Short=14-3-3E	1.1653	0.070567	0.13728	0.9938	-0.30918	0.93429	-0.19874	0.84671	0.1315	0.91975	0.036507	0.97282	-0.16881	0.99997	0.043505	0.98882	0.97044	0.025285	0.68231	0.23229	0.46892	0.63931	0.80158	0.17186
contig07876	SYFM_HUMANRecName: Full=Phenylalanine--tRNA ligase, mitochondrial; AltName: Full=Phenylalanyl-tRNA synthetase; Short=PheRS; Flags: Precursor	0.078686	0.94916	0.3288	0.92842	0.25409	0.92444	0.63519	0.17443	0.055015	0.96073	0.12243	0.86077	-0.22015	0.99997	0.16741	0.88397	1.0027	0.0039203	0.58649	0.16515	0.23489	0.79117	0.60325	0.17933
contig07887	BXL2_ARATHRecName: Full=Probable beta-D-xylosidase 2; Short=AtBXL2; Flags: Precursor	0.36565	0.85305	-1.1146	0.68237	0.49613	0.93429	0.62558	0.62248	0.28279	0.88209	-0.30499	0.82867	-0.27412	0.99997	0.23472	0.93527	1.8984	0.0074848	1.234	0.16027	0.62423	0.71713	1.5086	0.10038
contig07891	PSMD1_CHICKRecName: Full=26S proteasome non-ATPase regulatory subunit 1; AltName: Full=26S proteasome regulatory subunit RPN2; AltName: Full=26S proteasome regulatory subunit S1	0.58821	0.62162	-0.19863	0.9938	-0.49518	0.90244	-0.2932	0.82463	0.27758	0.85127	0.1834	0.8839	-0.31561	0.99997	-0.13289	0.9632	1.2875	0.024802	0.45991	0.61773	0.084063	0.96781	0.71116	0.38238
contig07892	BTBD2_HUMANRecName: Full=BTB/POZ domain-containing protein 2	0.62802	0.53983	-0.11677	0.99454	0.4731	0.89373	1.2666	0.070017	0.52745	0.58268	0.14938	0.89841	0.15859	0.99997	0.23371	0.90396	1.6855	0.002669	1.4726	0.024408	0.71932	0.51123	0.79741	0.27275
contig07893	CNOT7_MOUSERecName: Full=CCR4-NOT transcription complex subunit 7; AltName: Full=CCR4-associated factor 1; Short=CAF-1	0.13319	0.94084	-0.30491	0.98162	-0.29704	0.94592	-0.50133	0.57455	0.010719	0.99666	0.78414	0.33236	-0.69311	0.96202	-0.74852	0.44778	1.097	0.028691	-0.33394	0.69457	-0.58995	0.59689	-0.34067	0.67432
contig07900	CALUA_DANRERecName: Full=Calumenin-A; Flags: Precursor	0.64224	0.29022	0.83798	0.31732	0.66188	0.49542	0.78188	0.12243	1.0362	0.056572	0.71231	0.2301	0.39901	0.99997	0.3013	0.75041	1.0565	0.0057165	0.74459	0.10481	-0.30641	0.74547	0.034752	0.96428
contig07902	CAPZA_DROMERecName: Full=F-actin-capping protein subunit alpha	1.2698	0.33458	0.227	0.9938	0.04635	0.99686	1.0564	0.59308	0.30918	0.88484	0.55917	0.72581	0.18054	0.99997	0.010575	0.99859	1.3792	0.072024	2.3573	0.016527	1.6459	0.26994	1.5241	0.14609
contig07906	FABG_THEMARecName: Full=3-oxoacyl-	1.1402	0.44606	-0.27804	0.9938	0.68818	0.92728	0.71432	0.68801	0.17001	0.94968	0.38838	0.81245	0.61998	0.99997	0.96688	0.68795	2.048	0.026591	1.217	0.2706	1.414	0.45138	1.7676	0.15498
contig07921	CID2B_BRAFLRecName: Full=CDGSH iron-sulfur domain-containing protein 2 homolog B	1.13	0.54168	0.35003	0.9938	0.19856	0.99086	0.82968	0.68724	-0.15959	0.95991	-0.015711	0.99414	-0.87899	0.99997	-0.36806	0.93393	2.2226	0.021276	0.91642	0.52685	0.52258	0.86679	1.2783	0.39787
contig07929	DC1I2_MOUSERecName: Full=Cytoplasmic dynein 1 intermediate chain 2; AltName: Full=Cytoplasmic dynein intermediate chain 2; AltName: Full=Dynein intermediate chain 2, cytosolic; Short=DH IC-2	0.59319	0.27731	0.44932	0.81225	0.39329	0.80565	0.52796	0.28925	0.84868	0.089071	0.65988	0.2196	0.14992	0.99997	0.3257	0.68175	0.76413	0.022296	0.15456	0.80137	0.034418	0.97844	0.35514	0.46366
contig07934	RAB7_EPICORecName: Full=Ras-related protein rab7	0.28595	0.76447	-0.15068	0.9938	0.33681	0.90055	0.28929	0.70401	0.78553	0.17699	0.258	0.71567	-0.064002	0.99997	-0.13855	0.93014	1.0962	0.0060889	0.50219	0.3496	0.076567	0.95841	0.55456	0.30038
contig07937	PFD5_BOVINRecName: Full=Prefoldin subunit 5	0.60767	0.54133	-0.11142	0.99454	1.053	0.36905	1.3172	0.048544	0.22782	0.86807	0.4804	0.58035	-0.15048	0.99997	-0.20312	0.91869	0.64535	0.19537	0.4414	0.58223	0.41506	0.75227	0.88007	0.20269
contig07939	CUL4A_HUMANRecName: Full=Cullin-4A; Short=CUL-4A	0.16348	0.93058	0.024879	0.99792	0.15314	0.98305	-0.58936	0.63603	0.16167	0.92189	0.66241	0.45979	-0.15519	0.99997	-1.1119	0.33714	1.1856	0.031013	0.39527	0.66151	-0.5304	0.73149	-0.096011	0.93955
contig07954	SAR1_CAEELRecName: Full=GTP-binding protein SAR1	0.31972	0.75867	-0.053929	0.9957	-0.016716	0.99794	0.36512	0.6466	0.48225	0.51089	-0.70505	0.3016	0.061513	0.99997	0.55565	0.52934	1.0688	0.01296	0.87703	0.09704	0.47994	0.61682	1.099	0.053375
contig07962	SODM_MACFARecName: Full=Superoxide dismutase	0.91009	0.13731	-0.13976	0.9938	-1.0842	0.10706	-1.2739	0.012087	-0.54214	0.40013	-0.97988	0.11428	0.38796	0.99997	0.80937	0.26002	0.36005	0.35591	0.062532	0.9444	-0.25378	0.81847	0.38909	0.51216
contig07963	NSA2_HUMANRecName: Full=Ribosome biogenesis protein NSA2 homolog; AltName: Full=Hairy cell leukemia protein 1; AltName: Full=TGF-beta-inducible nuclear protein 1	0.25991	0.72321	-0.30124	0.93793	0.22061	0.93429	0.57175	0.20843	0.61042	0.19903	0.15129	0.81045	-0.36927	0.99997	-0.78214	0.12479	1.2004	0.00074664	0.82664	0.033777	0.24618	0.76141	0.78753	0.061375
contig07965	SRP68_CANFARecName: Full=Signal recognition particle subunit SRP68; Short=SRP68; AltName: Full=Signal recognition particle 68 kDa protein	0.63877	0.07766	0.4595	0.53022	0.21396	0.89897	0.19119	0.68603	0.32273	0.41529	-0.11962	0.80405	0.19061	0.99997	0.41801	0.3615	0.86904	0.0012082	0.49104	0.10539	0.21817	0.71918	0.37592	0.26252
contig07970	MSH2_HUMANRecName: Full=DNA mismatch repair protein Msh2; Short=hMSH2; AltName: Full=MutS protein homolog 2	0.55157	0.47013	-0.096927	0.99454	0.049746	0.99458	-0.058965	0.95866	0.18561	0.86743	0.58686	0.37929	-0.98287	0.34731	-0.76182	0.32282	0.99708	0.016872	0.50724	0.38804	-0.20456	0.86679	0.22738	0.74461
contig07971	NAS36_BRUMARecName: Full=Zinc metalloproteinase nas-36; AltName: Full=Nematode astacin 36; Flags: Precursor	1.5977	0.0398	2.0525	0.0040903	2.3297	0.00061002	3.5798	1.355e-07	1.9735	0.0061942	2.2938	0.001191	1.0008	0.65019	1.4376	0.073718	3.4497	2.0447e-07	3.7621	3.7069e-08	3.0267	1.3221e-05	3.3423	1.01e-06
contig07976	ABCF2_MOUSERecName: Full=ATP-binding cassette sub-family F member 2	0.2381	0.82451	-0.13876	0.9938	-0.33648	0.90329	-0.11404	0.91015	-0.025073	0.98644	0.54816	0.38586	-0.33102	0.99997	-0.72063	0.32282	1.2076	0.0034611	0.20905	0.76374	0.020585	0.99	0.32699	0.58751
contig07977	CHM1A_XENLARecName: Full=Charged multivesicular body protein 1a; AltName: Full=Chromatin-modifying protein 1a; Short=CHMP1a	0.45884	0.46287	0.20589	0.98162	-0.095378	0.98011	0.17529	0.82307	0.28325	0.67483	-0.40783	0.46241	0.022916	0.99997	-0.062633	0.97408	0.74421	0.028171	0.65165	0.12631	0.38501	0.61508	0.79488	0.078433
contig07980	PYRG1_MOUSERecName: Full=CTP synthase 1; AltName: Full=CTP synthetase 1; AltName: Full=UTP--ammonia ligase 1	0.49619	0.59748	-0.40113	0.95235	-0.27535	0.94592	-0.23291	0.82774	-0.055315	0.97136	0.2208	0.81113	0.018084	0.99997	-0.23876	0.87964	1.0443	0.024053	0.20789	0.80866	-0.10478	0.95153	0.27373	0.7206
contig07981	AR6P1_PONABRecName: Full=ADP-ribosylation factor-like protein 6-interacting protein 1; Short=ARL-6-interacting protein 1; Short=Aip-1; AltName: Full=Protein TBX2	-0.0026386	0.99887	-0.41159	0.81657	-0.031384	0.99544	0.11564	0.87953	0.65581	0.159	-0.015069	0.98425	-0.30457	0.99997	-0.20604	0.82015	0.65261	0.033768	0.22017	0.66641	-0.11736	0.90698	0.17357	0.73875
contig07982	1433E_DROMERecName: Full=14-3-3 protein epsilon; AltName: Full=Suppressor of Ras1 3-9	0.47275	0.57723	-0.55262	0.83084	-0.14092	0.97423	-0.25053	0.78439	-0.18347	0.87263	-0.24246	0.76296	-0.29074	0.99997	-0.15153	0.93095	1.0963	0.010887	0.38079	0.56337	-0.19914	0.87544	0.2116	0.77225
contig07988	ACPM_DROMERecName: Full=Acyl carrier protein, mitochondrial; Short=ACP; AltName: Full=NADH-ubiquinone oxidoreductase 9.6 kDa subunit; AltName: Full=NADH-ubiquinone oxidoreductase acyl-carrier subunit; Flags: Precursor	0.61111	0.57152	-0.046688	0.99719	0.66797	0.78789	1.6225	0.019409	0.7207	0.41444	-0.38978	0.68898	0.54077	0.99997	0.46239	0.73569	0.78901	0.13716	0.96334	0.16415	1.2263	0.22999	1.5802	0.029605
contig07992	TM256_BUFGRRecName: Full=Transmembrane protein 256 homolog; Flags: Precursor	0.11653	0.90048	0.14365	0.99305	0.18589	0.94109	0.3184	0.53689	0.45866	0.32386	-0.21925	0.67943	0.31058	0.99997	0.36978	0.55205	0.7014	0.018379	0.62824	0.087358	0.11723	0.90233	0.45683	0.26217
contig07995	GRP75_PONABRecName: Full=Stress-70 protein, mitochondrial; AltName: Full=75 kDa glucose-regulated protein; Short=GRP-75; AltName: Full=Heat shock 70 kDa protein 9; Flags: Precursor	1.2959	0.037414	1.3364	0.038269	0.55192	0.75189	1.0151	0.068848	0.81105	0.19944	0.28559	0.70983	0.61437	0.94233	0.92616	0.20441	1.4923	0.0012727	1.1262	0.030049	0.73613	0.37973	0.81693	0.14909
contig07996	COX1_LUMTERecName: Full=Cytochrome c oxidase subunit 1; AltName: Full=Cytochrome c oxidase polypeptide I	0.55218	0.67005	1.3603	0.29511	0.94376	0.59255	1.5785	0.038421	1.3202	0.13758	1.7668	0.050361	0.10929	0.99997	0.5118	0.72854	0.78189	0.17303	1.1621	0.11302	1.748	0.081593	1.3635	0.081476
contig07998	MTHSD_DANRERecName: Full=Methenyltetrahydrofolate synthase domain-containing protein	0.45345	0.56824	-0.25732	0.98116	-0.1231	0.97706	-0.047071	0.96677	0.25526	0.77699	-0.068014	0.94232	-0.010448	0.99997	-0.24948	0.83893	0.93066	0.02069	0.60955	0.25243	0.68208	0.39113	0.6028	0.27602
contig08000	OPA1_DANRERecName: Full=Dynamin-like 120 kDa protein, mitochondrial; AltName: Full=Optic atrophy protein 1 homolog; Contains: RecName: Full=Dynamin-like 120 kDa protein, form S1; Flags: Precursor	0.060505	0.98311	0.39585	0.98482	-0.15181	0.98919	0.50741	0.75415	0.76635	0.52942	1.2405	0.27174	0.6767	0.99997	0.26006	0.93577	2.1057	0.0040693	0.58788	0.59189	0.66416	0.73615	0.89171	0.42348
contig08003	PSB4_MOUSERecName: Full=Proteasome subunit beta type-4; AltName: Full=Low molecular mass protein 3; AltName: Full=Macropain beta chain; AltName: Full=Multicatalytic endopeptidase complex beta chain; AltName: Full=Proteasome beta chain; AltName: Full=Proteasome chain 3; Flags: Precursor	0.39248	0.83285	0.20947	0.9938	0.016863	0.99857	0.9864	0.34248	1.3864	0.17284	-0.38891	0.76017	0.34777	0.99997	0.54226	0.75575	1.391	0.037574	1.5036	0.071518	1.2229	0.35756	2.0186	0.025336
contig08008	---NA---	0.19565	0.92843	-1.2367	0.50377	-0.067197	0.99544	0.54375	0.65185	-0.27995	0.87081	0.15122	0.91732	-1.225	0.64232	-0.48161	0.78085	1.3106	0.039093	0.50156	0.62837	-0.24835	0.90394	0.49895	0.61773
contig08014	---NA---	0.88714	0.51685	0.066397	0.99719	-0.15212	0.98709	0.22722	0.90022	-0.6916	0.60165	-0.13153	0.93735	1.0135	0.99997	0.54663	0.77425	1.5973	0.043857	0.70232	0.51475	-0.059062	0.98331	0.85379	0.40017
contig08031	---NA---	0.50039	0.50577	0.40932	0.92229	0.046081	0.99513	0.093403	0.92943	0.28101	0.7404	0.77986	0.2204	0.56453	0.94732	0.36709	0.70321	1.1709	0.0045007	0.46324	0.41245	0.074531	0.9603	0.62209	0.24997
contig08033	---NA---	1.1122	0.18489	0.19494	0.9938	0.0077735	0.99885	0.45276	0.65201	0.58338	0.53328	0.81979	0.33843	0.056616	0.99997	-0.21522	0.91603	1.8918	0.0012649	0.93025	0.17199	-0.19136	0.91395	0.11983	0.91043
contig08035	VAT1_HUMANRecName: Full=Synaptic vesicle membrane protein VAT-1 homolog	0.49365	0.80823	0.72407	0.9585	-3.9883	0.026226	-3.0781	0.049493	-0.35667	0.87812	0.033358	0.98625	-1.6964	0.99997	0.67382	0.83893	1.1646	0.20573	0.051792	0.98171	-0.26744	0.94967	0.25719	0.90411
contig08078	ABD12_DANRERecName: Full=Lysophosphatidylserine lipase ABHD12; AltName: Full=2-arachidonoylglycerol hydrolase ABHD12; AltName: Full=Abhydrolase domain-containing protein 12; AltName: Full=Monoacylglycerol lipase ABHD12; AltName: Full=Oxidized phosphatidylserine lipase ABHD12	0.1766	0.91374	-0.13747	0.9938	0.25835	0.95342	0.55595	0.51551	0.18506	0.89552	-0.37032	0.67911	0.27559	0.99997	0.61308	0.55945	1.286	0.011035	0.75325	0.25729	0.74018	0.47104	1.0471	0.11552
contig08091	D7_XENLARecName: Full=Protein D7	0.84071	0.51377	0.39598	0.9938	-0.35222	0.96995	0.47422	0.83773	0.028955	0.99181	1.214	0.31908	0.026776	0.99997	-0.56911	0.86047	2.1764	0.035893	0.25275	0.9024	-0.26709	0.92207	-0.11557	0.93955
contig08095	NEDD1_BOVINRecName: Full=Protein NEDD1; AltName: Full=Neural precursor cell expressed developmentally down-regulated protein 1; Short=NEDD-1	0.54676	0.35278	0.3619	0.91621	0.39352	0.81699	1.0333	0.018861	0.24673	0.73814	-0.38569	0.49919	0.46029	0.98666	0.85295	0.12486	0.78039	0.023778	0.6203	0.1565	0.23918	0.79716	1.1867	0.010739
contig08096	---NA---	1.1755	0.34908	0.60504	0.97046	-0.52227	0.94054	0.65584	0.78155	-0.85272	0.49613	0.30769	0.83827	0.84039	0.99997	0.43532	0.89107	1.6071	0.049896	1.594	0.16758	0.23207	0.93556	0.6072	0.63844
contig08101	VATL_AEDAERecName: Full=V-type proton ATPase 16 kDa proteolipid subunit; Short=V-ATPase 16 kDa proteolipid subunit; AltName: Full=V-ATPase subunit C; AltName: Full=Vacuolar proton pump 16 kDa proteolipid subunit	0.5285	0.49349	0.30005	0.9714	0.2885	0.93429	0.90211	0.10586	-0.091837	0.94536	-0.22662	0.77438	0.25666	0.99997	0.55666	0.50338	1.0353	0.01273	0.4128	0.50313	-0.034201	0.98305	0.47329	0.42049
contig08106	WBP2_HUMANRecName: Full=WW domain-binding protein 2; Short=WBP-2	0.2671	0.87276	-0.39147	0.97809	-0.17837	0.97596	0.1292	0.93163	-0.14116	0.93686	-0.22521	0.84779	-0.14631	0.99997	0.44381	0.76567	1.2668	0.024741	0.39538	0.67346	0.085889	0.96664	1.0551	0.16558
contig08109	ATG13_DANRERecName: Full=Autophagy-related protein 13	0.22105	0.90688	-0.9883	0.66042	-0.83063	0.70211	-0.74729	0.44444	0.15595	0.93289	-1.1065	0.24883	0.22215	0.99997	-0.45056	0.81398	0.91438	0.115	1.6004	0.029481	-0.22931	0.91826	-0.00819	0.99548
contig08110	---NA---	-0.245	0.93742	0.86558	0.93612	-0.81716	0.93429	-0.14464	0.96473	0.44289	0.88563	1.7387	0.1949	-0.71659	0.99997	-0.68967	0.85744	3.5932	0.0053609	0.40361	0.80504	-1.3744	0.67919	-2.1427	0.19982
contig08115	OCTC_MOUSERecName: Full=Peroxisomal carnitine O-octanoyltransferase; Short=COT	0.59266	0.57411	-0.26704	0.98981	0.12791	0.98433	0.1572	0.90887	0.45759	0.65857	0.19636	0.85993	-0.051548	0.99997	0.24587	0.89848	1.2951	0.015237	0.45227	0.58634	0.38737	0.78228	0.83531	0.24892
contig08117	AQP5_MILTARecName: Full=Aquaporin-5; Short=AQP-5	0.30392	0.74884	0.15646	0.9938	0.080101	0.98861	0.34294	0.64023	0.5335	0.40109	-0.49453	0.4401	0.28058	0.99997	0.15617	0.91909	1.1419	0.0053039	0.75095	0.12952	0.53722	0.51207	0.82503	0.11679
contig08129	ACPM_DROMERecName: Full=Acyl carrier protein, mitochondrial; Short=ACP; AltName: Full=NADH-ubiquinone oxidoreductase 9.6 kDa subunit; AltName: Full=NADH-ubiquinone oxidoreductase acyl-carrier subunit; Flags: Precursor	0.20679	0.83291	0.036066	0.99719	0.25811	0.93205	0.8167	0.086985	0.055761	0.96187	-0.017955	0.98379	0.29347	0.99997	0.017349	0.99444	0.7023	0.04575	0.67171	0.13236	0.33628	0.69837	0.03577	0.96147
contig08131	STRAP_RATRecName: Full=Serine-threonine kinase receptor-associated protein; AltName: Full=UNR-interacting protein	0.27702	0.88894	-0.75654	0.87753	-0.046653	0.99793	0.51261	0.79882	-0.43777	0.7569	-1.0745	0.3016	-0.38769	0.99997	-0.028642	0.99595	1.0593	0.13377	1.7104	0.033493	1.1732	0.41536	0.91682	0.36968
contig08135	M17L2_XENTRRecName: Full=Mpv17-like protein 2	0.11955	0.85754	0.02574	0.99647	0.068031	0.97904	0.31944	0.38284	0.27044	0.49339	-0.27812	0.4619	0.010673	0.99997	0.21564	0.70187	0.58701	0.0123	0.44703	0.12245	0.21724	0.70172	0.49898	0.10463
contig08139	GANAB_MOUSERecName: Full=Neutral alpha-glucosidase AB; AltName: Full=Alpha-glucosidase 2; AltName: Full=Glucosidase II subunit alpha; Flags: Precursor	0.92447	0.11803	0.35356	0.94583	0.68029	0.52781	1.2585	0.010967	0.58779	0.34097	0.32332	0.6361	0.35994	0.99997	0.43272	0.62049	1.5177	0.0006165	1.0771	0.026316	0.51788	0.52641	0.44813	0.42292
contig08148	CATA_PIGRecName: Full=Catalase	0.053354	0.97873	0.10017	0.99454	0.043929	0.99544	-0.30651	0.76906	-0.52719	0.54576	-0.67523	0.39704	0.37821	0.99997	1.1468	0.16421	1.0147	0.037949	0.41272	0.59642	0.51985	0.64817	0.40508	0.59498
contig08162	PCKG_HAECORecName: Full=Phosphoenolpyruvate carboxykinase	0.71323	0.41209	0.0466	0.99719	0.21514	0.96349	0.75758	0.30668	0.52215	0.5499	0.37643	0.66815	0.24196	0.99997	0.075178	0.98063	1.5085	0.0035275	0.91661	0.13925	0.84759	0.38324	0.95675	0.14763
contig08170	NF70_DORPERecName: Full=70 kDa neurofilament protein; Short=NF70	0.13742	0.91932	-0.13352	0.9938	-0.62578	0.64489	-0.77673	0.17747	-0.46723	0.50499	-1.0724	0.088035	0.30589	0.99997	1.2806	0.02801	0.29043	0.46848	0.13537	0.86732	0.092008	0.95155	-0.013841	0.9878
contig08176	---NA---	0.7946	0.15938	0.29353	0.95853	0.77252	0.33276	0.83338	0.089322	0.70126	0.19967	0.50081	0.39469	0.10905	0.99997	-0.017696	0.99444	0.97782	0.0085762	0.59096	0.21362	0.027733	0.98531	0.057161	0.93955
contig08178	OSGI1_HUMANRecName: Full=Oxidative stress-induced growth inhibitor 1; AltName: Full=Bone marrow stromal cell-derived growth inhibitor; Short=BMSC-derived growth inhibitor; AltName: Full=Ovary, kidney and liver protein 38; Short=huOKL38; AltName: Full=Pregnancy-induced growth inhibitor OKL38	-0.16743	0.95485	-0.17731	0.99454	-0.59723	0.92518	-0.4173	0.8783	-0.72335	0.67818	0.81926	0.53115	-0.07322	0.99997	0.049939	0.99221	1.8851	0.031745	1.9126	0.080732	-0.11298	0.96845	0.23668	0.87421
contig08183	TRIB2_CANFARecName: Full=Tribbles homolog 2; Short=TRB-2	0.26697	0.70338	-0.34838	0.88841	-0.078657	0.9822	0.4545	0.3404	0.21292	0.75233	-0.11423	0.86081	-0.27469	0.99997	-0.097254	0.94172	0.87917	0.0060351	0.96981	0.012678	0.75055	0.18923	0.85278	0.038198
contig08205	VAT1L_HUMANRecName: Full=Synaptic vesicle membrane protein VAT-1 homolog-like	0.76021	0.61477	-0.36585	0.99099	0.44741	0.94481	0.15136	0.93883	0.87518	0.4823	1.0367	0.38051	-0.59416	0.99997	-1.1259	0.43006	1.4539	0.045437	0.31301	0.82073	-0.40264	0.84917	-0.14024	0.9269
contig08208	---NA---	0.37006	0.65012	-0.32791	0.95485	0.29823	0.92324	0.65469	0.23827	0.67982	0.23808	0.37659	0.55544	-0.3092	0.99997	-0.63959	0.37225	1.3276	0.0014523	0.61028	0.21918	0.035317	0.98074	0.29436	0.62077
contig08209	CATL_SARPERecName: Full=Cathepsin L; Contains: RecName: Full=Cathepsin L heavy chain; Contains: RecName: Full=Cathepsin L light chain; Flags: Precursor	0.39524	0.85231	-0.42192	0.98482	0.26064	0.97152	0.27939	0.87913	0.6431	0.6593	-0.13431	0.9386	-0.15429	0.99997	0.47445	0.8325	1.8668	0.01317	0.96442	0.35252	0.30313	0.89826	1.2787	0.20434
contig08210	DTX3_HUMANRecName: Full=Probable E3 ubiquitin-protein ligase DTX3; AltName: Full=Protein deltex-3; Short=Deltex3; AltName: Full=RING finger protein 154; AltName: Full=RING-type E3 ubiquitin transferase DTX3	0.45264	0.21956	-0.087906	0.9938	-0.030527	0.99314	-0.04185	0.94593	0.46508	0.17786	-0.34775	0.34765	-0.14289	0.99997	0.081782	0.93115	0.71391	0.0032367	0.4079	0.16191	0.27169	0.59219	0.72912	0.017798
contig08212	UBCD1_DROMERecName: Full=Ubiquitin-conjugating enzyme E2-17 kDa; AltName: Full=E2 ubiquitin-conjugating enzyme D1; AltName: Full=Protein effete; AltName: Full=Ubiquitin carrier protein; AltName: Full=Ubiquitin-protein ligase	1.1551	0.25428	0.37279	0.98162	0.34767	0.94794	-0.1955	0.91312	1.0014	0.30019	0.13481	0.9337	-0.18588	0.99997	0.34197	0.86846	0.75183	0.26568	1.5484	0.04487	1.2082	0.31678	1.3753	0.096199
contig08216	---NA---	1.5373	0.047161	0.83196	0.69184	0.74004	0.69718	1.4066	0.037261	1.0844	0.17015	0.74784	0.37401	0.42635	0.99997	0.31456	0.84873	1.5042	0.0055329	1.2368	0.055315	0.77863	0.46965	0.42478	0.59954
contig08223	---NA---	0.99082	0.59005	-0.26548	0.9938	-0.10011	0.99544	0.21422	0.93763	-0.35468	0.92897	0.96456	0.52482	0.40189	0.99997	0.31359	0.95019	2.0415	0.046051	1.2175	0.40219	0.62017	0.88044	0.18444	0.92934
contig08231	QORL2_NEMVERecName: Full=Quinone oxidoreductase-like protein 2 homolog	0.43105	0.81142	-0.29652	0.9938	0.55074	0.91577	1.0708	0.28993	0.5749	0.66746	-0.1569	0.91887	0.3727	0.99997	0.5274	0.76897	1.4145	0.035742	0.5864	0.5807	0.29922	0.88518	1.223	0.18322
contig08234	NHR23_CAEELRecName: Full=Nuclear hormone receptor family member nhr-23; AltName: Full=Steroid hormone receptor family member chr-3	2.3944	3.8236e-07	2.7029	1.5394e-08	2.3015	4.0392e-07	2.7367	5.0917e-09	3.0188	1.3978e-09	2.69	1.7706e-08	2.2708	1.8135e-06	2.5426	6.1883e-08	2.9965	6.8006e-10	2.7709	3.4526e-09	2.4907	2.5858e-07	2.7932	5.159e-09
contig08244	FAS_CHICKRecName: Full=Fatty acid synthase; Includes: RecName: Full=[Acyl-carrier-protein] S-acetyltransferase; Includes: RecName: Full=[Acyl-carrier-protein] S-malonyltransferase; Includes: RecName: Full=3-oxoacyl-[acyl-carrier-protein] synthase; Includes: RecName: Full=3-oxoacyl-[acyl-carrier-protein] reductase; Includes: RecName: Full=3-hydroxyacyl-[acyl-carrier-protein] dehydratase; Includes:…	0.56707	0.56606	1.2132	0.23394	-0.63886	0.7656	-0.55468	0.51735	-1.0551	0.16057	-0.51218	0.54036	0.27122	0.99997	2.182	0.00064772	-0.28969	0.55941	-0.26949	0.76025	-0.61453	0.57043	-0.22618	0.79669
contig08249	HPCD_METS5RecName: Full=3-hydroxypropionyl-coenzyme A dehydratase; Short=3-hydroxypropionyl-CoA dehydratase	-0.09811	0.9681	-0.45685	0.96591	0.90766	0.65392	0.88969	0.33108	-0.11499	0.95389	0.77486	0.427	-0.15304	0.99997	0.78657	0.58801	1.6091	0.0085762	0.84783	0.29633	0.38046	0.84043	0.7196	0.45721
contig08253	DHB12_HUMANRecName: Full=Very-long-chain 3-oxoacyl-CoA reductase; AltName: Full=17-beta-hydroxysteroid dehydrogenase 12; Short=17-beta-HSD 12; AltName: Full=3-ketoacyl-CoA reductase; Short=KAR; AltName: Full=Estradiol 17-beta-dehydrogenase 12; AltName: Full=Short chain dehydrogenase/reductase family 12C member 1	0.52119	0.56197	0.050523	0.99647	-0.35379	0.92363	0.1076	0.92935	0.16761	0.89614	-0.076196	0.9431	0.025214	0.99997	0.49349	0.63201	1.1498	0.012488	0.45253	0.50879	0.017561	0.99195	0.65294	0.30018
contig08254	HNRPM_MOUSERecName: Full=Heterogeneous nuclear ribonucleoprotein M; Short=hnRNP M	0.51111	0.30944	0.2022	0.97898	0.25914	0.90291	0.53318	0.22339	0.77694	0.085318	0.32618	0.51408	-0.13847	0.99997	-0.09372	0.94304	0.71905	0.017827	0.43224	0.28993	0.34897	0.6031	0.66231	0.098243
contig08255	HS90B_DANRERecName: Full=Heat shock protein HSP 90-beta	0.72443	0.093651	0.11689	0.9938	-0.096859	0.97356	-0.084089	0.90948	0.35105	0.46648	0.06178	0.9248	-0.36507	0.99997	-0.017474	0.99261	0.48201	0.086699	0.46671	0.21228	0.66559	0.21429	1.0108	0.0092876
contig08256	---NA---	0.94018	0.43125	0.014916	0.99864	-0.35664	0.95026	-0.061889	0.9743	0.28819	0.8725	-0.16856	0.91135	-0.52687	0.99997	-0.03129	0.99459	1.8409	0.0070524	0.47615	0.6634	-0.69358	0.65313	0.16567	0.89852
contig08259	DNJA1_PONABRecName: Full=DnaJ homolog subfamily A member 1; Flags: Precursor	0.64198	0.29222	0.065823	0.99454	0.52461	0.69639	0.56583	0.31099	0.61972	0.27662	0.68281	0.25479	-0.15895	0.99997	-0.3974	0.63557	1.0272	0.0069771	0.46382	0.37236	-0.013964	0.99195	0.28982	0.61597
contig08263	VATB_HELVIRecName: Full=V-type proton ATPase subunit B; Short=V-ATPase subunit B; AltName: Full=Vacuolar proton pump subunit B	0.58811	0.67369	0.34052	0.98865	0.17366	0.98089	0.22435	0.88739	-0.096186	0.96337	0.51269	0.64467	0.71779	0.99997	0.78638	0.55467	1.2605	0.044077	0.21119	0.86659	-0.23648	0.90912	0.41473	0.68505
contig08267	ARPC4_XENLARecName: Full=Actin-related protein 2/3 complex subunit 4	0.35515	0.87021	0.088433	0.9957	-2.7856	0.0058364	-1.7625	0.07266	-0.29471	0.88484	0.20758	0.89979	-0.076306	0.99997	0.25964	0.93295	0.32082	0.66599	0.075814	0.96599	0.29689	0.89993	0.2641	0.84597
contig08270	---NA---	0.73695	0.16629	0.42345	0.8573	-0.14724	0.96491	0.23933	0.73057	0.5248	0.33106	0.15793	0.81891	0.10017	0.99997	0.090763	0.95663	0.95996	0.0065691	0.48889	0.29193	0.46341	0.51526	0.64204	0.16408
contig08271	COFI_USTMARecName: Full=Cofilin; AltName: Full=Actin-depolymerizing factor 1	0.51781	0.40648	0.097841	0.9938	-0.38555	0.83789	-0.27136	0.69431	0.23259	0.76908	-0.33792	0.57307	0.18967	0.99997	0.15188	0.9087	0.73936	0.03579	0.57764	0.21095	0.15235	0.88908	0.52693	0.28107
contig08277	SBP1_XENTRRecName: Full=Methanethiol oxidase; Short=MTO; AltName: Full=Selenium-binding protein 1	0.97984	0.31089	-0.21946	0.9938	-1.2557	0.31556	-1.0109	0.23184	-0.65863	0.51038	-0.69486	0.4633	0.22072	0.99997	1.0959	0.30256	1.5298	0.0095826	0.12172	0.92144	-0.15494	0.94026	0.55523	0.5202
contig08280	SPCS3_DROMERecName: Full=Signal peptidase complex subunit 3; AltName: Full=Microsomal signal peptidase 22 kDa subunit; Short=SPC22; Short=SPase 22 kDa subunit	0.13829	0.93741	-0.35801	0.97207	0.14716	0.97888	0.69628	0.37027	0.49632	0.58251	-0.16863	0.87489	0.26413	0.99997	0.6	0.56897	1.558	0.0030348	0.75484	0.2516	0.53737	0.63687	0.92678	0.16555
contig08286	RSRC2_RATRecName: Full=Arginine/serine-rich coiled-coil protein 2	0.24729	0.7838	0.013221	0.99816	0.014356	0.99794	0.04628	0.96216	0.47386	0.40703	0.29009	0.63998	-0.14358	0.99997	-0.090176	0.95825	0.75492	0.031973	0.20167	0.74574	-0.35355	0.67458	0.1275	0.8444
contig08292	RPN1_PIGRecName: Full=Dolichyl-diphosphooligosaccharide--protein glycosyltransferase subunit 1; AltName: Full=Dolichyl-diphosphooligosaccharide--protein glycosyltransferase 67 kDa subunit; AltName: Full=Ribophorin I; Short=RPN-I; AltName: Full=Ribophorin-1; Flags: Precursor	0.6127	0.38004	0.29417	0.97145	0.10191	0.98237	0.43425	0.53609	0.44562	0.52728	-0.46473	0.48196	0.30355	0.99997	0.89329	0.20065	1.0523	0.01023	0.61627	0.24956	0.45683	0.61498	0.88669	0.097779
contig08308	NF70_DORPERecName: Full=70 kDa neurofilament protein; Short=NF70	1.2798	0.072069	0.66426	0.79521	0.20879	0.96359	1.0142	0.12261	0.18963	0.88563	0.42416	0.60439	0.69041	0.94732	1.241	0.10279	1.8075	0.00078994	1.2029	0.04224	0.45225	0.69863	0.71479	0.27956
contig08313	---NA---	0.69924	0.35893	-0.13656	0.9938	0.2074	0.961	0.61368	0.38469	0.54145	0.47145	-0.19193	0.83478	-0.045858	0.99997	0.44524	0.66974	1.0473	0.019513	0.81145	0.15162	0.62011	0.50358	1.1301	0.058334
contig08327	SUCB2_PIGRecName: Full=Succinate--CoA ligase	0.90574	0.11335	0.7184	0.52226	0.39772	0.84792	0.52141	0.38428	0.35002	0.62608	0.3379	0.60169	0.10918	0.99997	0.89449	0.15473	1.3627	0.0011631	1.0222	0.02922	0.48255	0.551	0.79015	0.11812
contig08329	RBBP7_DANRERecName: Full=Histone-binding protein RBBP7; AltName: Full=Retinoblastoma-binding protein 7; Short=RBBP-7	0.4067	0.55599	0.19864	0.98482	0.48288	0.72071	1.2936	0.0034012	0.65844	0.21522	0.22265	0.73149	-0.10548	0.99997	0.3177	0.71435	1.0499	0.0042762	0.70762	0.10575	0.5226	0.47035	0.99943	0.032636
contig08331	PTBP2_HUMANRecName: Full=Polypyrimidine tract-binding protein 2; AltName: Full=Neural polypyrimidine tract-binding protein; AltName: Full=Neurally-enriched homolog of PTB; AltName: Full=PTB-like protein	0.48686	0.69299	0.48986	0.94925	-0.51626	0.88547	-0.1368	0.92425	-0.18218	0.91095	0.54182	0.55712	0.12848	0.99997	0.36218	0.82258	1.2463	0.023467	0.2671	0.78961	0.25212	0.8797	0.45703	0.58913
contig08345	ARMC7_HUMANRecName: Full=Armadillo repeat-containing protein 7	0.44591	0.88894	0.55597	0.98866	-0.96263	0.88939	-0.17608	0.94982	1.0578	0.57204	0.72289	0.69954	0.26794	0.99997	-0.081262	0.99221	2.5971	0.013839	0.78034	0.64539	0.50021	0.88881	0.73799	0.69485
contig08349	---NA---	0.26667	0.84147	-0.089688	0.99454	0.27229	0.94689	0.92727	0.16613	0.40483	0.66832	-0.12098	0.91182	0.62219	0.99814	0.032145	0.99185	0.97926	0.039139	0.92167	0.12331	0.39296	0.74828	0.5793	0.3935
contig08350	VTC1A_DANRERecName: Full=V-type proton ATPase subunit C 1-A; Short=V-ATPase subunit C 1-A; AltName: Full=Vacuolar proton pump subunit C 1-A	1.059	0.064537	0.55986	0.7566	0.90644	0.22112	1.3385	0.0057688	0.7376	0.20273	0.16509	0.83491	0.067817	0.99997	0.43151	0.61524	1.0556	0.0075424	0.59307	0.2446	-0.19858	0.85887	0.20171	0.75833
contig08352	---NA---	0.66363	0.27917	-0.244	0.98049	-0.94642	0.16188	-0.80306	0.1178	-1.1153	0.043348	0.027458	0.97575	-0.10334	0.99997	0.46219	0.55877	0.84966	0.040875	0.0062779	0.99489	-0.17029	0.88106	0.019005	0.98358
contig08355	PGK_CAEELRecName: Full=Probable phosphoglycerate kinase	0.7797	0.5761	-0.43246	0.98162	0.090787	0.99544	1.0055	0.56513	-0.45164	0.77287	-0.066231	0.96946	-0.48459	0.99997	0.95818	0.4986	1.6623	0.018301	1.1796	0.19088	0.66675	0.69523	0.93797	0.33729
contig08360	MYPH_ECHGRRecName: Full=Myophilin	0.69147	0.2102	0.31	0.94757	-0.013724	0.99794	0.050397	0.95768	0.42073	0.46838	-0.45785	0.4144	0.22639	0.99997	0.47918	0.48967	0.73416	0.032613	0.38476	0.44392	0.36697	0.64616	0.66041	0.15577
contig08365	CATC_HUMANRecName: Full=Dipeptidyl peptidase 1; AltName: Full=Cathepsin C; AltName: Full=Cathepsin J; AltName: Full=Dipeptidyl peptidase I; Short=DPP-I; Short=DPPI; AltName: Full=Dipeptidyl transferase; Contains: RecName: Full=Dipeptidyl peptidase 1 exclusion domain chain; AltName: Full=Dipeptidyl peptidase I exclusion domain chain; Contains: RecName: Full=Dipeptidyl peptidase 1 heavy chain; AltN…	0.055288	0.97775	-0.29421	0.98162	-0.12598	0.9822	-0.26707	0.80714	0.004602	0.99863	0.14526	0.89372	-0.26468	0.99997	0.40598	0.74672	1.1336	0.021114	0.21851	0.81067	-0.32794	0.80606	0.24434	0.77231
contig08366	---NA---	0.09748	0.97435	-0.20624	0.9938	0.017249	0.99857	-0.052669	0.98278	-0.14763	0.95293	0.3178	0.83813	0.5463	0.99997	-0.09867	0.98805	2.9916	0.00063071	1.2447	0.20526	0.19636	0.94967	0.42476	0.76858
contig08392	---NA---	0.066374	0.98315	-0.96049	0.85122	-0.50769	0.93493	-0.52394	0.73849	-0.57096	0.72025	-1.2054	0.32649	-0.66198	0.99997	0.24064	0.9419	1.5961	0.036186	0.95524	0.37637	0.46092	0.82789	1.3379	0.19741
contig08425	MIC60_MOUSERecName: Full=MICOS complex subunit Mic60; AltName: Full=Mitochondrial inner membrane protein; AltName: Full=Mitofilin; Flags: Precursor	0.61352	0.4582	0.34613	0.96555	0.62364	0.71622	0.89882	0.15233	0.2564	0.81408	0.29947	0.71786	-0.087075	0.99997	0.47311	0.64628	1.2937	0.0057165	0.55058	0.38965	0.60243	0.5233	1.1965	0.047001
contig08429	FMRF_APLCARecName: Full=FMRF-amide neuropeptides; Contains: RecName: Full=FLRF-amide; Contains: RecName: Full=FMRF-amide; Flags: Precursor	-0.3108	0.80348	-0.25352	0.98865	0.7642	0.58181	0.911	0.16857	-0.042588	0.97793	-0.60272	0.43206	-0.027322	0.99997	0.23199	0.88892	1.2757	0.0082761	0.80932	0.18069	-0.10262	0.95334	0.61601	0.35284
contig08440	---NA---	0.16245	0.86837	-0.041916	0.9957	0.32316	0.87903	0.4562	0.39187	0.51445	0.33022	0.15442	0.81895	0.12349	0.99997	-0.28587	0.73436	0.82973	0.014197	0.31854	0.53305	0.3881	0.60298	0.44721	0.34129
contig08442	---NA---	0.61152	0.1779	0.30628	0.91497	0.57697	0.39642	0.96825	0.0084187	0.52906	0.22882	0.090269	0.88711	0.091481	0.99997	0.20591	0.80166	0.96157	0.0021334	0.68341	0.056887	0.35542	0.57417	0.3436	0.40524
contig08447	CTU1_XENTRRecName: Full=Cytoplasmic tRNA 2-thiolation protein 1; AltName: Full=ATP-binding domain-containing protein 3; AltName: Full=Cytoplasmic tRNA adenylyltransferase 1	-0.030213	0.98921	-0.34128	0.97898	0.076891	0.99312	0.33529	0.78099	-0.074006	0.96464	0.11784	0.92656	-0.56727	0.99997	-0.62361	0.65928	2.1224	0.0046809	0.62933	0.37134	-0.82469	0.47608	0.10507	0.92785
contig08460	EFTU_MOUSERecName: Full=Elongation factor Tu, mitochondrial; Flags: Precursor	0.33444	0.62264	0.19583	0.98168	0.46667	0.69377	1.1305	0.0059894	0.73926	0.13416	0.36293	0.50186	-0.12523	0.99997	0.044698	0.983	1.4034	0.0002336	0.79906	0.048318	0.080259	0.94515	0.56972	0.19831
contig08463	---NA---	0.85677	0.45192	0.027195	0.99792	-0.10668	0.99086	-0.065455	0.9701	0.71623	0.50429	0.99115	0.32023	-0.16054	0.99997	-0.63337	0.66085	1.5053	0.01658	0.78819	0.36782	0.34758	0.84533	0.69857	0.43658
contig08464	SYNC_BOVINRecName: Full=Asparagine--tRNA ligase, cytoplasmic; AltName: Full=Asparaginyl-tRNA synthetase; Short=AsnRS	0.43849	0.50999	0.020531	0.99792	0.20027	0.94687	0.2051	0.78581	0.77315	0.14059	0.17906	0.79204	-0.15531	0.99997	-0.16681	0.89261	0.85176	0.015417	0.48371	0.30922	0.21577	0.82219	0.48268	0.32036
contig08465	DHE3_HUMANRecName: Full=Glutamate dehydrogenase 1, mitochondrial; Short=GDH 1; Flags: Precursor	0.71502	0.15166	0.36345	0.88997	-0.022172	0.99645	0.39958	0.45671	-0.54549	0.27228	-0.41857	0.4277	0.59601	0.71083	1.1862	0.0066459	0.78396	0.01616	0.76097	0.056887	0.40095	0.56678	0.49203	0.27036
contig08471	ODPB_BOVINRecName: Full=Pyruvate dehydrogenase E1 component subunit beta, mitochondrial; Short=PDHE1-B; Flags: Precursor	0.59426	0.25202	0.52364	0.66949	0.68141	0.32576	1.2901	0.0011335	0.60197	0.2097	-0.096737	0.89008	0.53888	0.80891	0.97156	0.033171	0.94613	0.0043669	0.94008	0.017905	0.43824	0.50796	0.6917	0.10069
contig08475	CAT2_CLOK5RecName: Full=4-hydroxybutyrate coenzyme A transferase	1.2239	0.3107	0.32455	0.99367	0.20206	0.98026	0.76364	0.54728	0.58509	0.6866	0.37293	0.79099	-0.77386	0.99997	-0.40682	0.88467	3.2337	0.00017483	1.4815	0.1001	0.26122	0.92391	0.77083	0.52199
contig08484	CETN1_BOVINRecName: Full=Centrin-1	0.26963	0.79771	-0.59438	0.74239	-0.16553	0.9658	-0.089331	0.93382	0.0077444	0.99715	-0.083208	0.92796	-0.27527	0.99997	0.15682	0.92069	0.85478	0.031849	0.28782	0.66246	-0.30941	0.76402	0.16818	0.81255
contig08485	---NA---	0.75377	0.26414	-0.013985	0.99857	0.016704	0.99794	0.33382	0.67444	0.053998	0.96861	-0.059592	0.95209	-0.19287	0.99997	-0.24376	0.8546	1.0156	0.01499	0.62033	0.26239	0.42639	0.65943	0.85021	0.12423
contig08487	PX11C_HUMANRecName: Full=Peroxisomal membrane protein 11C; AltName: Full=Peroxin-11C; AltName: Full=Peroxisomal biogenesis factor 11C; AltName: Full=Protein PEX11 homolog gamma; Short=PEX11-gamma	0.30943	0.8394	0.071006	0.9957	0.53881	0.87701	0.67106	0.46207	0.51085	0.62342	0.19721	0.86511	0.11789	0.99997	1.1539	0.23627	1.3007	0.018547	0.77684	0.29829	0.40279	0.78214	1.0952	0.13645
contig08493	MLX_HUMANRecName: Full=Max-like protein X; AltName: Full=Class D basic helix-loop-helix protein 13; Short=bHLHd13; AltName: Full=Max-like bHLHZip protein; AltName: Full=Protein BigMax; AltName: Full=Transcription factor-like protein 4	0.57953	0.30341	0.033281	0.99719	0.39504	0.80752	0.73851	0.1108	0.77728	0.12851	0.1238	0.8626	-0.15857	0.99997	0.34129	0.66647	0.94245	0.0069854	0.84535	0.043879	0.5156	0.4576	0.92958	0.039592
contig08498	C124A_XENLARecName: Full=Coiled-coil domain-containing protein 124-A	0.19157	0.74465	-0.091656	0.9938	0.20762	0.9058	0.49577	0.1466	0.66922	0.06603	0.17899	0.68368	-0.067478	0.99997	-0.17006	0.80935	0.67559	0.0073814	0.52694	0.084099	0.3334	0.51416	0.6005	0.066399
contig08506	AIFM2_TAEGURecName: Full=Apoptosis-inducing factor 2	1.5443	0.16376	1.6241	0.31732	0.73779	0.88988	0.47562	0.78213	1.5482	0.15287	0.66803	0.58192	1.6346	0.38543	2.1203	0.041778	1.4767	0.037474	1.4085	0.11335	1.336	0.33768	2.0281	0.033108
contig08511	GRP75_BOVINRecName: Full=Stress-70 protein, mitochondrial; AltName: Full=75 kDa glucose-regulated protein; Short=GRP-75; AltName: Full=Heat shock 70 kDa protein 9; Flags: Precursor	0.95838	0.39639	0.40852	0.98482	-1.2295	0.54436	-0.41362	0.85756	0.41956	0.77031	1.0277	0.3207	0.25238	0.99997	0.21899	0.95133	1.6327	0.013922	0.082155	0.9554	0.58628	0.77582	0.94013	0.35486
contig08512	IF4A2_MOUSERecName: Full=Eukaryotic initiation factor 4A-II; Short=eIF-4A-II; Short=eIF4A-II; AltName: Full=ATP-dependent RNA helicase eIF4A-2	0.78999	0.30177	0.16178	0.9938	0.29562	0.94054	0.59595	0.42802	0.056105	0.97122	-0.025795	0.98233	-0.11811	0.99997	0.38475	0.74501	1.4423	0.0031503	1.0757	0.059076	0.61791	0.5207	1.0608	0.083475
contig08513	NAPEP_HUMANRecName: Full=N-acyl-phosphatidylethanolamine-hydrolyzing phospholipase D; Short=N-acyl phosphatidylethanolamine phospholipase D; Short=NAPE-PLD; Short=NAPE-hydrolyzing phospholipase D	0.53511	0.65059	0.17161	0.9938	2.1848	0.10749	2.3766	0.022222	0.93572	0.34001	0.48072	0.61102	-0.35048	0.99997	0.37205	0.90085	0.55892	0.49127	-0.16183	0.9083	0.29725	0.90583	0.1429	0.92873
contig08514	ARF1_XENLARecName: Full=ADP-ribosylation factor 1	-0.3927	0.88492	-1.085	0.86168	0.84829	0.87984	1.4314	0.27787	-0.61993	0.74732	-1.0136	0.4863	-0.42211	0.99997	-0.30889	0.93382	2.2707	0.01167	1.5276	0.17991	0.90161	0.66632	1.3306	0.2777
contig08520	SUCB1_BOVINRecName: Full=Succinate--CoA ligase	1.0132	0.19937	0.32918	0.98047	0.2194	0.96349	0.56439	0.50847	0.55716	0.52085	0.045765	0.97041	0.44406	0.99997	1.0195	0.25293	1.3248	0.0092421	0.8508	0.18505	0.40912	0.74908	0.82993	0.22029
contig08523	S14L2_RATRecName: Full=SEC14-like protein 2; AltName: Full=Alpha-tocopherol-associated protein; Short=TAP; AltName: Full=Squalene transfer protein; AltName: Full=Supernatant protein factor; Short=SPF	0.19696	0.92233	0.049572	0.99726	-1.1711	0.53517	-1.2022	0.27738	0.11519	0.95437	-0.56932	0.62827	0.18265	0.99997	-0.39187	0.82735	1.3436	0.046764	0.05355	0.97121	0.93248	0.50938	-0.16784	0.88554
contig08527	TCPD_MOUSERecName: Full=T-complex protein 1 subunit delta; Short=TCP-1-delta; AltName: Full=A45; AltName: Full=CCT-delta	1.0108	0.45232	-0.26882	0.9938	-0.13216	0.99135	0.029907	0.99102	0.33963	0.86055	-0.22413	0.88988	-1.1004	0.98666	-0.2998	0.93664	1.6239	0.027819	1.1473	0.23928	-0.26091	0.92537	0.7371	0.55299
contig08536	---NA---	1.7251	0.021954	0.63241	0.85328	-0.63862	0.77494	-0.64647	0.43676	0.19598	0.88946	0.30351	0.78112	-0.48376	0.99997	0.82552	0.4639	1.5865	0.01294	1.0138	0.16266	-0.59281	0.69523	-0.68982	0.39182
contig08537	PROF_CLYJARecName: Full=Profilin	0.79133	0.52686	-0.54189	0.9585	-0.27981	0.96491	-0.26824	0.86441	-0.1413	0.94738	-0.087674	0.95484	-0.20272	0.99997	0.36645	0.86349	1.2889	0.044983	0.057704	0.97121	-0.08458	0.97077	0.47063	0.64782
contig08539	AR6P1_PONABRecName: Full=ADP-ribosylation factor-like protein 6-interacting protein 1; Short=ARL-6-interacting protein 1; Short=Aip-1; AltName: Full=Protein TBX2	0.54074	0.56161	0.0050738	0.99948	-0.16822	0.97013	0.16756	0.88739	0.30958	0.76907	-0.35268	0.67652	0.79801	0.80959	0.72765	0.42678	0.97609	0.03714	0.70474	0.26457	0.5501	0.59935	0.84082	0.18842
contig08544	LOX5_HUMANRecName: Full=Arachidonate 5-lipoxygenase; Short=5-LO; Short=5-lipoxygenase	0.16332	0.90809	-0.11012	0.99454	0.079392	0.99043	0.029537	0.98218	0.63083	0.37093	0.33467	0.67216	0.23469	0.99997	-0.20703	0.89665	1.4045	0.0027932	0.62521	0.29794	0.59	0.52283	0.80918	0.17585
contig08546	WDR1_DROMERecName: Full=Actin-interacting protein 1; Short=AIP1; AltName: Full=Protein flare	0.92694	0.54541	1.1424	0.75889	1.0188	0.89224	1.4409	0.46198	0.75004	0.61047	0.99072	0.43801	0.24177	0.99997	0.40031	0.90015	2.1303	0.01726	0.48709	0.7187	-0.26698	0.9295	0.68475	0.61739
contig08548	NASP_HUMANRecName: Full=Nuclear autoantigenic sperm protein; Short=NASP	0.53865	0.46894	0.33634	0.9585	0.43035	0.8455	1.0609	0.042906	0.46308	0.50407	0.0054807	0.99417	0.5731	0.94732	0.45254	0.61426	0.83965	0.036186	0.73942	0.14709	0.63896	0.43072	0.68386	0.20965
contig08552	CD63_RABITRecName: Full=CD63 antigen; AltName: CD_antigen=CD63	0.83163	0.24012	0.1948	0.9938	-0.33578	0.92413	0.073509	0.95081	0.27667	0.77938	0.25305	0.75968	-0.27247	0.99997	-0.035607	0.9909	0.99152	0.023496	0.41635	0.5321	0.26232	0.82865	0.42612	0.51178
contig08553	---NA---	0.21151	0.85706	-0.40484	0.92842	0.19144	0.96043	0.25411	0.76956	0.65103	0.30685	0.42616	0.53266	-0.23687	0.99997	-0.81351	0.27087	0.96858	0.018382	0.46879	0.42602	0.11896	0.93391	0.37164	0.54447
contig08562	---NA---	0.72847	0.55069	-0.07386	0.9957	0.27383	0.96349	0.58563	0.60479	0.39216	0.78139	0.1479	0.91708	-0.094297	0.99997	-0.028095	0.99484	1.743	0.0066481	0.39868	0.7078	0.43396	0.79572	0.54429	0.56438
contig08567	FCNV2_CERRYRecName: Full=Ryncolin-2; Flags: Precursor	0.21668	0.89316	-0.2281	0.9938	0.11402	0.9864	0.31997	0.77146	-0.0093305	0.99735	0.62463	0.45977	-0.020882	0.99997	0.30786	0.85191	1.3418	0.010726	1.134	0.077557	0.56515	0.63278	1.1348	0.098532
contig08576	DUOX_DROMERecName: Full=Dual oxidase	0.64688	0.28684	-0.05464	0.99556	-0.15284	0.96538	0.50938	0.38227	0.75632	0.17456	-0.13584	0.86095	-0.12277	0.99997	0.65517	0.3452	0.82213	0.044267	1.1655	0.012253	0.84464	0.22217	1.0099	0.04018
contig08580	HIL_DROMERecName: Full=Hillarin; AltName: Full=D-Hillarin; Short=D-hil	1.0172	0.35663	0.52636	0.9585	-0.066903	0.99544	0.23829	0.88161	-1.7234	0.074254	-1.2631	0.22529	1.333	0.71083	2.2838	0.02801	1.6018	0.02673	1.0606	0.20761	0.28751	0.90156	0.69395	0.51857
contig08592	EVPL_MOUSERecName: Full=Envoplakin; AltName: Full=210 kDa cornified envelope precursor protein; AltName: Full=p210	0.42427	0.52415	0.074	0.99454	-0.0015916	0.9997	-0.48974	0.36532	0.4371	0.44828	0.22903	0.71881	0.21559	0.99997	-0.11953	0.93395	0.80899	0.019933	0.46295	0.33306	0.073399	0.95512	0.19214	0.74186
contig08594	SYLC_HUMANRecName: Full=Leucine--tRNA ligase, cytoplasmic; AltName: Full=Leucyl-tRNA synthetase; Short=LeuRS	-0.19867	0.91682	-0.041764	0.99792	-0.42358	0.93493	0.34503	0.8111	-0.013448	0.99611	1.0387	0.26674	-0.057793	0.99997	-0.0045788	0.99921	1.57	0.016218	0.86324	0.26368	-0.094649	0.96744	0.26899	0.81346
contig08606	---NA---	0.33944	0.4653	-0.23646	0.94095	-0.22166	0.89897	0.075992	0.90725	0.17232	0.75523	-0.46443	0.25613	-0.12443	0.99997	0.37187	0.45517	0.63927	0.012408	0.41662	0.20385	0.27281	0.63931	0.63489	0.059471
contig08607	KLH12_HUMANRecName: Full=Kelch-like protein 12; AltName: Full=CUL3-interacting protein 1; AltName: Full=DKIR homolog; Short=hDKIR	0.16849	0.96418	-0.043126	0.99857	1.2842	0.87913	2.0413	0.32466	0.394	0.894	0.53662	0.84545	-0.25605	0.99997	0.20431	0.98553	3.1098	0.034582	2.699	0.14428	0.025767	0.99543	0.38984	0.87771
contig08610	CCNH_BOVINRecName: Full=Cyclin-H	0.64199	0.32327	-0.11793	0.9938	0.021546	0.99741	0.35055	0.62208	0.2856	0.72417	0.25306	0.72224	-0.10347	0.99997	-0.36508	0.69728	0.98261	0.012185	0.33594	0.5796	0.20763	0.85334	0.46602	0.39617
contig08611	STX5_BOVINRecName: Full=Syntaxin-5	0.075302	0.93919	-0.44077	0.69166	0.15329	0.94809	0.34085	0.45819	0.34544	0.45493	-0.16375	0.75187	-0.048808	0.99997	-0.29083	0.64559	0.63879	0.021364	0.23861	0.58225	0.20214	0.78277	0.36509	0.34799
contig08614	---NA---	0.11278	0.97236	-0.24638	0.9938	0.020343	0.99857	0.37616	0.83514	-0.088487	0.97291	-0.33613	0.85259	0.28699	0.99997	-0.37129	0.89258	2.1548	0.048385	0.16009	0.92275	0.50049	0.83756	-0.11123	0.94466
contig08623	ELP3_CHICKRecName: Full=Elongator complex protein 3	0.59999	0.18962	0.17571	0.98162	0.40238	0.7145	0.69117	0.073617	0.82794	0.054544	0.52944	0.26012	0.075201	0.99997	0.21398	0.78868	0.91927	0.0028721	0.58963	0.10291	0.27904	0.69211	0.53803	0.17042
contig08625	BXL2_ARATHRecName: Full=Probable beta-D-xylosidase 2; Short=AtBXL2; Flags: Precursor	0.32162	0.88788	-0.89332	0.86943	0.354	0.95851	0.55837	0.70232	0.4272	0.81027	-0.039934	0.98294	-0.058523	0.99997	0.22039	0.94687	2.0449	0.0073933	1.1853	0.22333	0.557	0.77435	1.4969	0.13184
contig08635	---NA---	0.36801	0.57885	0.05614	0.99454	0.38888	0.80572	0.77934	0.077484	0.59895	0.23194	0.15188	0.81997	0.012217	0.99997	-0.26306	0.7614	0.86468	0.010187	0.70783	0.085293	0.36665	0.62589	0.46935	0.30708
contig08643	OFUT1_DROMERecName: Full=GDP-fucose protein O-fucosyltransferase 1; AltName: Full=Neurotic protein; AltName: Full=Peptide-O-fucosyltransferase 1; Short=O-FucT-1; Flags: Precursor	0.8653	0.45374	-0.23055	0.9938	0.69566	0.83078	1.0873	0.23901	0.18619	0.92197	0.80032	0.43685	-0.81015	0.99997	-0.42362	0.86977	1.5339	0.016353	0.60465	0.52985	0.64534	0.71318	0.73571	0.47602
contig08645	EXOS4_BOVINRecName: Full=Exosome complex component RRP41; AltName: Full=Exosome component 4; AltName: Full=Ribosomal RNA-processing protein 41	-0.4514	0.84193	0.37453	0.9938	-0.8487	0.8826	-0.30554	0.8783	-0.53786	0.79487	-0.30616	0.87205	4.4393	0.020467	2.3354	0.25428	2.5735	0.026018	-0.02593	0.99128	0.42644	0.90308	1.1398	0.37321
contig08646	Y2144_ARATHRecName: Full=Putative leucine-rich repeat receptor-like serine/threonine-protein kinase At2g14440; Flags: Precursor	0.058721	0.96518	-0.055582	0.99454	-0.31896	0.87913	-0.06291	0.94401	0.23211	0.74773	-0.67161	0.20814	-0.10485	0.99997	0.52226	0.41763	0.96818	0.005119	0.63912	0.12514	0.45984	0.50657	0.97634	0.027882
contig08647	UBP16_RATRecName: Full=Ubiquitin carboxyl-terminal hydrolase 16; AltName: Full=Deubiquitinating enzyme 16; AltName: Full=Ubiquitin thioesterase 16; AltName: Full=Ubiquitin-specific-processing protease 16	0.36095	0.76927	-0.6987	0.77976	-0.16717	0.97344	-0.3132	0.76399	-0.45358	0.62928	-0.12655	0.9105	-0.55545	0.99997	-0.2368	0.89258	0.9895	0.043394	0.52472	0.47285	0.18119	0.91212	0.63331	0.36512
contig08650	LHYAL_HIRNIRecName: Full=Hyaluronoglucuronidase; Short=LHyal; AltName: Full=Hyaluronate 3-glycanohydrolase	0.70731	0.28419	-0.13328	0.9938	0.17066	0.96522	0.3909	0.58784	0.35975	0.64199	-0.080269	0.9316	-0.024016	0.99997	0.19716	0.88956	1.5051	0.00082758	0.79884	0.11029	0.10391	0.94246	0.63649	0.24716
contig08652	THIKB_RATRecName: Full=3-ketoacyl-CoA thiolase B, peroxisomal; AltName: Full=Acetyl-CoA acyltransferase B; AltName: Full=Beta-ketothiolase B; AltName: Full=Peroxisomal 3-oxoacyl-CoA thiolase B; Flags: Precursor	0.3134	0.81443	-0.05832	0.996	0.18074	0.96995	0.68814	0.38139	0.38228	0.70852	0.2591	0.78863	-0.7101	0.94732	-0.61313	0.55881	0.99373	0.043775	0.61758	0.37948	-0.44578	0.71914	-0.20172	0.81967
contig08658	KANL3_RATRecName: Full=KAT8 regulatory NSL complex subunit 3; AltName: Full=NSL complex protein NSL3; AltName: Full=Non-specific lethal 3 homolog	0.85929	0.29675	0.39338	0.95957	0.31525	0.94054	-0.044638	0.9754	0.35066	0.74354	-0.39598	0.65238	0.1834	0.99997	0.24125	0.89164	0.59879	0.26892	0.88119	0.16491	1.386	0.11702	1.4956	0.025336
contig08660	---NA---	0.33323	0.52705	-0.02187	0.99726	0.069276	0.9822	0.35056	0.4325	0.2903	0.55009	-0.4415	0.31197	0.14298	0.99997	0.43459	0.40885	0.50843	0.059311	0.65098	0.053503	0.48753	0.37002	0.91144	0.013151
contig08663	SYAP1_HUMANRecName: Full=Synapse-associated protein 1; AltName: Full=BSD domain-containing signal transducer and Akt interactor protein; Short=BSTA	0.54152	0.38685	-0.013626	0.99806	0.42435	0.80549	0.72871	0.14517	0.72966	0.17789	0.2772	0.66601	-0.22773	0.99997	-0.1518	0.91081	1.261	0.0014025	0.61421	0.18442	0.10546	0.93331	0.43465	0.39463
contig08667	FUMA_ECOL6RecName: Full=Fumarate hydratase class I, aerobic; AltName: Full=Fumarase A; AltName: Full=Oxaloacetate keto--enol-isomerase; Short=OAAKE isomerase; AltName: Full=Oxaloacetate tautomerase	0.78265	0.060797	0.68307	0.23179	0.37195	0.7458	0.61428	0.10719	0.69836	0.097405	-0.11987	0.83563	0.3999	0.94732	0.7697	0.073504	0.90164	0.0025688	0.69623	0.044698	0.22982	0.74926	0.51638	0.17277
contig08673	CMFB_DICDIRecName: Full=Conditioned medium factor receptor 1	1.1378	0.15948	1.1918	0.31259	0.51225	0.87701	0.62449	0.47512	0.43415	0.67526	0.89644	0.28568	1.0444	0.5649	1.5873	0.034085	1.1878	0.023053	0.673	0.35538	0.93523	0.36705	1.3392	0.055127
contig08688	SYNM_MOUSERecName: Full=Probable asparagine--tRNA ligase, mitochondrial; AltName: Full=Asparaginyl-tRNA synthetase; Short=AsnRS; Flags: Precursor	1.1232	0.28644	0.74261	0.87366	2.0143	0.38824	0.39665	0.83773	1.2341	0.24495	1.6788	0.10057	-1.3454	0.96434	-1.0846	0.6172	1.4032	0.045413	0.099162	0.94851	0.98192	0.59935	0.47644	0.71043
contig08689	CP4F2_HUMANRecName: Full=Cytochrome P450 4F2; AltName: Full=20-hydroxyeicosatetraenoic acid synthase; Short=20-HETE synthase; AltName: Full=Arachidonic acid omega-hydroxylase; AltName: Full=CYPIVF2; AltName: Full=Cytochrome P450-LTB-omega; AltName: Full=Docosahexaenoic acid omega-hydroxylase; AltName: Full=Leukotriene-B(4) 20-monooxygenase 1; AltName: Full=Leukotriene-B(4) omega-hydroxylase 1; Al…	0.44125	0.79897	1.3503	0.4457	1.02	0.83427	1.4011	0.32539	0.76249	0.4997	1.8499	0.070222	0.61618	0.99997	-0.14719	0.97012	2.0258	0.0080537	-0.045767	0.97834	0.20841	0.93592	0.10149	0.94709
contig08691	MTND_BRAFLRecName: Full=1,2-dihydroxy-3-keto-5-methylthiopentene dioxygenase; AltName: Full=Acireductone dioxygenase (Fe(2+)-requiring); Short=ARD; Short=Fe-ARD	-0.020198	0.995	-1.1767	0.73213	-0.31246	0.97013	0.60789	0.73131	-0.2498	0.91456	-0.40783	0.78702	-1.1243	0.99997	0.086603	0.99143	2.0652	0.0098864	1.5965	0.10116	-0.75489	0.80008	0.18247	0.9362
contig08706	---NA---	0.34122	0.64238	-0.39563	0.88395	-0.0091754	0.99857	-0.34872	0.62364	-0.44095	0.44074	0.17888	0.78999	-0.64944	0.81537	-0.539	0.48702	1.0454	0.0085391	-0.50439	0.28028	-0.51374	0.52519	-0.4093	0.46632
contig08714	AURKA_HUMANRecName: Full=Aurora kinase A; AltName: Full=Aurora 2; AltName: Full=Aurora/IPL1-related kinase 1; Short=ARK-1; Short=Aurora-related kinase 1; Short=hARK1; AltName: Full=Breast tumor-amplified kinase; AltName: Full=Serine/threonine-protein kinase 15; AltName: Full=Serine/threonine-protein kinase 6; AltName: Full=Serine/threonine-protein kinase aurora-A	0.22221	0.84257	-0.4581	0.88395	0.031996	0.99576	0.062309	0.95436	-0.015641	0.99184	0.10397	0.9087	-0.33324	0.99997	-0.51519	0.53726	0.89408	0.025307	0.35085	0.57506	-0.0082388	0.99482	0.52437	0.35192
contig08715	LMAN2_CANFARecName: Full=Vesicular integral-membrane protein VIP36; AltName: Full=Lectin mannose-binding 2; AltName: Full=Vesicular integral-membrane protein 36; Short=VIP36; Flags: Precursor	0.61159	0.1038	0.29908	0.8689	0.26272	0.8455	0.29954	0.47072	0.58661	0.11672	0.090947	0.86213	0.045997	0.99997	0.17435	0.8045	0.83204	0.0019899	0.44451	0.15946	0.12463	0.86406	0.48465	0.14744
contig08727	GBG1_DROMERecName: Full=Guanine nucleotide-binding protein subunit gamma-1; Flags: Precursor	0.77715	0.47013	-0.33926	0.98462	0.29735	0.95528	0.44021	0.70062	0.41342	0.74253	-0.61701	0.52673	-0.22057	0.99997	0.57389	0.67704	1.4312	0.015116	0.90999	0.23782	0.364	0.82066	1.0367	0.19021
contig08728	PRS7_MOUSERecName: Full=26S proteasome regulatory subunit 7; AltName: Full=26S proteasome AAA-ATPase subunit RPT1; AltName: Full=Proteasome 26S subunit ATPase 2; AltName: Full=Protein MSS1	0.41473	0.46853	-0.012353	0.99792	-0.1405	0.9625	0.0014193	0.99898	-0.1573	0.84017	-0.33446	0.51558	-0.037385	0.99997	0.34398	0.61994	0.75394	0.015878	0.49673	0.22029	0.23181	0.77483	0.3426	0.44293
contig08730	ATE1_DROMERecName: Full=Arginyl-tRNA--protein transferase 1; Short=Arginyltransferase 1; Short=R-transferase 1; AltName: Full=Arginine-tRNA--protein transferase 1	0.67019	0.14591	0.081684	0.9938	-0.054308	0.99043	-0.046713	0.95436	0.6152	0.17427	0.0027432	0.99632	-0.087723	0.99997	0.046988	0.97978	0.70716	0.019013	0.42823	0.29219	0.12065	0.89973	0.69547	0.080839
contig08732	5NTD_BOVINRecName: Full=5'-nucleotidase; Short=5'-NT; AltName: Full=Ecto-5'-nucleotidase; AltName: CD_antigen=CD73; Flags: Precursor	1.2804	0.081853	0.92166	0.53997	1.1079	0.27583	1.3918	0.028731	0.73475	0.34636	0.81187	0.30361	1.1555	0.50721	1.4861	0.082045	2.374	6.4598e-05	2.0943	0.00071525	1.2412	0.2305	1.6492	0.025573
contig08739	TEKT3_HUMANRecName: Full=Tektin-3	0.93424	0.32446	-0.00019288	0.99986	-0.28442	0.95606	-0.058792	0.97039	0.95941	0.26701	0.35611	0.73235	-0.42504	0.99997	-0.34908	0.84081	1.2762	0.023833	0.26075	0.80218	-0.57553	0.6651	-0.21812	0.83073
contig08740	GAB2_MOUSERecName: Full=GRB2-associated-binding protein 2; AltName: Full=GRB2-associated binder 2; AltName: Full=Growth factor receptor bound protein 2-associated protein 2; AltName: Full=PH domain-containing adaptor molecule p97	0.12093	0.93647	-0.30669	0.9741	0.12731	0.97877	0.62113	0.34768	0.42489	0.58717	-0.31968	0.67687	0.16848	0.99997	0.40193	0.6987	1.4433	0.0018594	0.80508	0.13506	0.30376	0.79016	0.59615	0.31718
contig08752	PNO1_XENLARecName: Full=RNA-binding protein PNO1	0.049483	0.97075	-0.1746	0.98865	0.16939	0.95205	0.50414	0.29623	0.80428	0.095772	0.29466	0.59124	-0.17186	0.99997	-0.5372	0.37877	1.0288	0.0026823	0.61366	0.12899	0.19412	0.82752	0.53575	0.21967
contig08760	CCNI_MOUSERecName: Full=Cyclin-I	0.41901	0.70396	-0.24905	0.98952	0.29631	0.94481	0.88034	0.20843	-0.058967	0.97136	-0.070925	0.95164	-0.30577	0.99997	0.16035	0.93747	1.0933	0.024676	0.52833	0.45925	0.081384	0.96477	0.74471	0.26728
contig08770	GBG12_BOVINRecName: Full=Guanine nucleotide-binding protein G(I)/G(S)/G(O) subunit gamma-12; AltName: Full=Gamma-S1; Flags: Precursor	0.58439	0.29773	0.076427	0.99454	0.26549	0.92363	0.76547	0.0943	0.62456	0.22308	0.27594	0.6436	0.094823	0.99997	0.14014	0.91363	0.94851	0.0066692	0.43703	0.35586	0.41722	0.57043	0.80055	0.076318
contig08783	---NA---	0.70484	0.4351	0.11665	0.99454	-0.18035	0.97013	0.0010274	0.99954	0.10739	0.94797	0.27663	0.77432	0.24722	0.99997	0.78471	0.41952	0.99611	0.044702	0.57752	0.42299	-0.4064	0.75227	0.019093	0.98715
contig08788	CUL2_MOUSERecName: Full=Cullin-2; Short=CUL-2	0.084739	0.95194	-0.35852	0.93793	0.27894	0.92935	0.43622	0.49432	0.23576	0.78273	-0.19412	0.79068	-0.17162	0.99997	-0.10715	0.9495	1.0627	0.0062698	0.42594	0.43408	-0.25229	0.80562	0.19238	0.76461
contig08790	---NA---	1.0194	0.075762	0.64686	0.65343	0.80971	0.34501	1.1638	0.018127	0.61594	0.30482	-0.093599	0.91491	0.48946	0.99997	1.1932	0.030874	1.1549	0.0041815	1.006	0.034063	0.2286	0.83179	0.66228	0.20351
contig08797	---NA---	1.7751	0.0011216	1.507	0.0091416	2.2456	1.9692e-05	2.3322	5.7465e-06	1.9039	0.00038327	1.4244	0.019094	1.3823	0.030087	1.6843	0.0016807	2.6189	3.8703e-07	2.7672	1.2681e-07	2.306	2.1046e-05	2.4708	2.7108e-06
contig08799	ACOX1_BOVINRecName: Full=Peroxisomal acyl-coenzyme A oxidase 1; Short=AOX; AltName: Full=Palmitoyl-CoA oxidase; Contains: RecName: Full=Peroxisomal acyl-CoA oxidase 1, A chain; Contains: RecName: Full=Peroxisomal acyl-CoA oxidase 1, B chain; Contains: RecName: Full=Peroxisomal acyl-CoA oxidase 1, C chain	0.74435	0.51361	-0.27318	0.99367	0.20431	0.98426	0.54431	0.7567	0.13719	0.94372	-0.42197	0.73049	-0.13275	0.99997	0.41209	0.80935	1.5066	0.024486	0.69814	0.41233	0.0043188	0.99825	0.75214	0.37209
contig08811	ACADL_RATRecName: Full=Long-chain specific acyl-CoA dehydrogenase, mitochondrial; Short=LCAD; Flags: Precursor	0.49048	0.47642	0.15602	0.9938	0.19696	0.95104	0.67997	0.20157	0.5061	0.39818	-0.021594	0.98174	0.27065	0.99997	0.69061	0.31412	1.3571	0.0010362	0.92904	0.043223	0.60782	0.40824	1.011	0.04133
contig08812	---NA---	0.38282	0.53563	-0.17697	0.98622	0.11926	0.96995	0.4163	0.4217	0.5996	0.21219	-0.025879	0.974	-0.21997	0.99997	-0.15326	0.89225	1.0037	0.0030041	0.56848	0.16061	0.42323	0.52612	0.60406	0.15944
contig08817	DCA10_DROMERecName: Full=DDB1- and CUL4-associated factor 10 homolog; AltName: Full=WD repeat-containing protein 32 homolog	-0.10742	0.91649	-0.44574	0.76678	0.099663	0.97519	0.22223	0.72005	0.40416	0.42433	-0.0076306	0.99081	-0.10774	0.99997	-0.34043	0.62504	0.71663	0.020987	0.31971	0.48862	0.12178	0.90301	0.28054	0.54616
contig08825	BODG_RHILORecName: Full=Probable gamma-butyrobetaine dioxygenase; AltName: Full=Gamma-butyrobetaine hydroxylase; Short=Gamma-BBH; AltName: Full=Gamma-butyrobetaine,2-oxoglutarate dioxygenase	0.71427	0.7388	0.17129	0.99454	0.33612	0.96995	0.6034	0.74481	0.67559	0.71818	-0.34783	0.85385	0.024177	0.99997	0.91389	0.66361	1.9676	0.028824	0.95556	0.47455	0.43312	0.87199	1.2471	0.32149
contig08826	TYB_CAEELRecName: Full=Thymosin beta; AltName: Full=Tetrathymosin beta	0.42883	0.3736	-0.073998	0.99451	0.11426	0.96659	0.36464	0.42217	0.51543	0.2229	-0.28525	0.54288	0.090713	0.99997	-0.072516	0.95729	0.75204	0.0085038	0.53051	0.13138	0.28504	0.6653	0.47992	0.20425
contig08827	---NA---	0.66387	0.4466	-0.26411	0.98744	-0.25768	0.95026	0.41225	0.64627	0.25173	0.83271	0.25935	0.7797	-0.1974	0.99997	-0.40185	0.74292	0.98863	0.037938	0.57996	0.39464	-0.17417	0.91288	-0.14582	0.87382
contig08829	---NA---	0.27402	0.80832	-0.39324	0.94095	0.42586	0.87021	0.66836	0.29348	-0.47048	0.52649	-0.36848	0.61491	-0.53237	0.99997	0.38998	0.7077	0.80657	0.054727	0.56848	0.33283	0.47606	0.62152	1.2617	0.026357
contig08836	SRSF4_MOUSERecName: Full=Serine/arginine-rich splicing factor 4; AltName: Full=Splicing factor, arginine/serine-rich 4	0.69739	0.4303	-0.15297	0.9938	-0.055024	0.99529	-0.093958	0.94303	-0.20417	0.87887	0.0088826	0.99286	-0.96315	0.59272	-0.70586	0.46965	1.777	0.0011009	0.37473	0.63939	-0.64412	0.5332	-0.29499	0.71484
contig08843	COPB_BOVINRecName: Full=Coatomer subunit beta; AltName: Full=Beta-coat protein; Short=Beta-COP	0.74119	0.6056	0.086694	0.9957	0.0057719	0.99945	0.32136	0.84656	0.056225	0.98086	0.35106	0.79952	0.1787	0.99997	0.35961	0.90015	1.535	0.028504	1.1232	0.22138	-0.22802	0.93391	0.86416	0.44477
contig08849	---NA---	0.24048	0.76987	-0.26532	0.95867	0.080555	0.98404	0.51828	0.2949	0.42373	0.43624	0.072776	0.92343	-0.36107	0.99997	-0.73231	0.19923	0.80584	0.015485	0.21649	0.69891	-0.22982	0.79573	-0.005777	0.99412
contig08852	CP2DF_CANFARecName: Full=Cytochrome P450 2D15; AltName: Full=CYPIID15; AltName: Full=Cytochrome P450 DUT2	7.9806	3.4979e-16	7.8454	5.8764e-16	7.1958	8.562e-15	7.2141	8.0307e-15	7.7556	8.2408e-16	7.1214	1.3229e-14	6.8707	3.9726e-14	7.5062	2.4215e-15	8.569	3.1752e-17	7.9024	4.6066e-16	6.765	6.6448e-14	7.1044	1.4453e-14
contig08853	TRPM3_HUMANRecName: Full=Transient receptor potential cation channel subfamily M member 3; AltName: Full=Long transient receptor potential channel 3; Short=LTrpC-3; Short=LTrpC3; AltName: Full=Melastatin-2; Short=MLSN2	0.67581	0.76542	0.2199	0.99454	0.19202	0.99135	-0.56745	0.84435	0.49027	0.8288	0.45692	0.80025	0.85864	0.99997	-0.85099	0.80974	1.0172	0.25675	2.6871	0.013387	0.21234	0.95512	0.41731	0.79535
contig08855	ARF2_RATRecName: Full=ADP-ribosylation factor 2	0.70621	0.25029	0.59887	0.69267	0.31627	0.90668	0.78828	0.12872	0.24213	0.77472	-0.2385	0.73164	0.38958	0.99997	0.66532	0.34772	1.4077	0.00083782	0.81778	0.080572	0.20033	0.85448	0.33951	0.54974
contig08858	CP072_HUMANRecName: Full=UPF0472 protein C16orf72	0.38571	0.6331	-0.091375	0.99454	0.28907	0.92683	0.50805	0.41323	0.64114	0.28014	0.27013	0.69641	-0.038995	0.99997	-0.45528	0.58535	0.76693	0.044071	0.28965	0.64483	0.30802	0.75598	0.34579	0.55049
contig08863	CHM2A_DANRERecName: Full=Charged multivesicular body protein 2a; AltName: Full=Chromatin-modifying protein 2a; Short=CHMP2a	0.53473	0.31806	0.021066	0.99792	0.68644	0.32548	0.89697	0.029233	0.6691	0.16631	-0.069368	0.92446	-0.15974	0.99997	-0.073206	0.96372	0.80349	0.012985	0.9039	0.023234	0.38404	0.58476	0.79661	0.061375
contig08865	EIF3L_DANRERecName: Full=Eukaryotic translation initiation factor 3 subunit L; Short=eIF3l; AltName: Full=Eukaryotic translation initiation factor 3 subunit 6-interacting protein; AltName: Full=Eukaryotic translation initiation factor 3 subunit E-interacting protein	0.46654	0.26891	0.23109	0.94757	0.16599	0.93993	0.24806	0.59391	0.26008	0.57817	-0.49695	0.23069	0.22166	0.99997	0.44011	0.36381	0.52376	0.040604	0.51825	0.10635	0.29019	0.61842	0.63599	0.064468
contig08875	ERD2_DROMERecName: Full=ER lumen protein-retaining receptor	0.57208	0.77918	0.34706	0.9938	-0.34241	0.96995	0.17309	0.94249	0.52447	0.77118	-0.36519	0.88361	-0.30275	0.99997	-0.33211	0.92749	2.4561	0.042939	0.43387	0.79146	0.19581	0.95351	0.43888	0.77835
contig08878	S61A2_MOUSERecName: Full=Protein transport protein Sec61 subunit alpha isoform 2; Short=Sec61 alpha-2	0.16862	0.90308	-0.32494	0.97046	0.038411	0.99544	0.39692	0.62208	-0.1892	0.87274	-0.40881	0.58295	-0.061003	0.99997	0.77694	0.34603	0.86539	0.045977	0.3527	0.61525	0.18873	0.88898	0.91829	0.11602
contig08879	---NA---	0.31175	0.56265	0.17297	0.98162	0.10239	0.96995	0.33126	0.46453	0.6015	0.14327	0.002188	0.99686	0.17166	0.99997	-0.021387	0.99143	0.789	0.0052707	0.51638	0.13156	0.030088	0.97604	0.21889	0.60418
contig08883	CYH1_HUMANRecName: Full=Cytohesin-1; AltName: Full=PH, SEC7 and coiled-coil domain-containing protein 1; AltName: Full=SEC7 homolog B2-1	0.70747	0.10467	-0.00031216	0.99986	0.41712	0.68701	0.36002	0.45129	0.46187	0.30459	-0.29785	0.53873	-0.14737	0.99997	0.070943	0.96026	1.0827	0.00082758	0.60498	0.091802	0.055192	0.95988	0.43028	0.28056
contig08885	---NA---	-1.2193	0.42529	-0.29715	0.9938	-0.27078	0.9842	-0.048317	0.98859	-0.33507	0.92006	0.020559	0.99081	1.6012	0.99997	0.62113	0.86647	2.3465	0.03395	0.9869	0.41485	0.77921	0.82719	0.56676	0.75039
contig08893	SRSF2_CHICKRecName: Full=Serine/arginine-rich splicing factor 2; AltName: Full=Protein PR264; AltName: Full=Splicing component, 35 kDa; AltName: Full=Splicing factor SC35; Short=SC-35; AltName: Full=Splicing factor, arginine/serine-rich 2	0.61547	0.4891	-0.15031	0.9938	0.17235	0.96998	0.47505	0.57284	0.53769	0.51201	0.053928	0.96233	0.16728	0.99997	-0.36958	0.76912	1.0191	0.031172	0.36428	0.6372	0.27293	0.83792	0.56594	0.40149
contig08904	SYAC_RATRecName: Full=Alanine--tRNA ligase, cytoplasmic; AltName: Full=Alanyl-tRNA synthetase; Short=AlaRS	0.41002	0.42109	-0.0075831	0.99864	0.34311	0.79559	0.45711	0.28119	0.56708	0.18557	0.1179	0.84207	-0.064455	0.99997	-0.25915	0.71119	0.85391	0.0041897	0.39742	0.30615	0.092848	0.92362	0.3619	0.36941
contig08909	---NA---	-1.3038	0.23115	0.019189	0.99864	1.5198	0.65249	1.9145	0.14939	-0.93495	0.37856	-0.064369	0.97132	0.0085309	0.99997	0.59187	0.84853	2.3096	0.0079296	1.4562	0.12196	1.457	0.47867	0.85152	0.42033
contig08918	TRI56_HUMANRecName: Full=E3 ubiquitin-protein ligase TRIM56; AltName: Full=RING finger protein 109; AltName: Full=RING-type E3 ubiquitin transferase TRIM56; AltName: Full=Tripartite motif-containing protein 56	0.25499	0.84111	-0.038232	0.99726	-0.069107	0.99171	0.010392	0.99375	0.35916	0.69719	0.11127	0.91438	-0.047098	0.99997	0.18108	0.91851	1.1762	0.010925	0.10191	0.91508	-0.46963	0.65943	0.13296	0.8787
contig08931	BICD_DROMERecName: Full=Protein bicaudal D	0.14458	0.90421	-0.18729	0.99198	0.11429	0.97798	0.044093	0.96728	-0.58329	0.32973	0.063139	0.94358	-0.14011	0.99997	0.066615	0.97577	0.73767	0.049667	0.33949	0.56545	0.031862	0.98292	0.52272	0.32294
contig08943	IF2B2_PONABRecName: Full=Insulin-like growth factor 2 mRNA-binding protein 2; Short=IGF2 mRNA-binding protein 2; Short=IMP-2; AltName: Full=IGF-II mRNA-binding protein 2; AltName: Full=VICKZ family member 2	0.61534	0.14856	0.40272	0.75629	0.62324	0.27365	1.0214	0.0033196	0.42251	0.3331	0.11696	0.83813	0.081864	0.99997	0.032325	0.98703	0.76983	0.0068995	0.66538	0.051691	0.53754	0.31587	0.63266	0.085423
contig08953	---NA---	0.53441	0.74657	-0.35283	0.98952	0.2161	0.97614	0.12245	0.94678	0.86651	0.45076	0.75705	0.50663	-0.38894	0.99997	-1.0252	0.44818	1.3517	0.047448	-0.027479	0.98791	-0.31708	0.87923	-0.079897	0.95591
contig08954	RM15_XENLARecName: Full=39S ribosomal protein L15, mitochondrial; Short=L15mt; Short=MRP-L15; Flags: Precursor	0.15128	0.90897	-0.31055	0.96995	0.10626	0.98526	0.8557	0.19844	0.4008	0.60197	0.43198	0.53277	-0.017104	0.99997	-0.38409	0.7462	1.2142	0.01034	0.46733	0.43658	0.17616	0.90662	0.30017	0.6886
contig08955	TCPB_BOVINRecName: Full=T-complex protein 1 subunit beta; Short=TCP-1-beta; AltName: Full=CCT-beta	0.90814	0.041573	0.45782	0.72492	-0.026153	0.99544	0.099754	0.89605	0.78532	0.081239	0.026649	0.97124	0.15891	0.99997	0.25765	0.73331	1.0028	0.0020521	0.61378	0.10128	0.34897	0.60298	0.61911	0.12423
contig08956	TALDO_HUMANRecName: Full=Transaldolase	0.49423	0.65059	0.34844	0.97898	0.29848	0.94606	0.72158	0.36257	0.15324	0.93133	0.78113	0.34011	0.34054	0.99997	0.74754	0.45626	1.6944	0.0020907	0.85397	0.1935	0.67305	0.52742	0.55595	0.44843
contig08961	FEM1A_DANRERecName: Full=Protein fem-1 homolog A; Short=FEM1a; AltName: Full=FEM1-alpha	0.11881	0.95428	-1.2096	0.35489	0.429	0.92363	0.56717	0.55611	0.15522	0.9267	0.30396	0.77273	-0.63168	0.99997	-0.59305	0.63282	1.1841	0.029969	0.35131	0.70676	0.23198	0.89179	0.81535	0.28056
contig08962	MCCA_HUMANRecName: Full=Methylcrotonoyl-CoA carboxylase subunit alpha, mitochondrial; Short=MCCase subunit alpha; AltName: Full=3-methylcrotonyl-CoA carboxylase 1; AltName: Full=3-methylcrotonyl-CoA carboxylase biotin-containing subunit; AltName: Full=3-methylcrotonyl-CoA:carbon dioxide ligase subunit alpha; Flags: Precursor	0.78043	0.087136	0.42402	0.78946	0.41021	0.73356	0.80428	0.041315	0.87103	0.053416	0.29329	0.56787	0.19418	0.99997	0.32616	0.63654	0.95362	0.0030837	0.67936	0.071186	0.55331	0.35715	0.61572	0.12925
contig08967	---NA---	0.16907	0.91766	0.77302	0.70446	0.013067	0.99857	0.40362	0.71165	0.20465	0.87866	0.96544	0.22368	-0.68431	0.95877	-0.84353	0.36276	1.4076	0.011869	0.96609	0.11613	-0.13947	0.93589	-0.18762	0.8335
contig08974	---NA---	0.5602	0.2031	-0.084133	0.9938	0.44994	0.58164	0.67399	0.06587	0.72154	0.081757	-0.14452	0.78822	-0.042982	0.99997	0.064906	0.96276	0.91842	0.0021197	0.75093	0.02849	0.47504	0.38683	0.96695	0.0096942
contig08977	PDPK1_MOUSERecName: Full=3-phosphoinositide-dependent protein kinase 1; Short=mPDK1	1.1571	0.3246	-0.84664	0.86395	-0.82824	0.8455	-2.131	0.060561	0.057722	0.97985	0.18055	0.91852	-0.78361	0.99997	-0.4967	0.83159	2.2031	0.0068535	0.52579	0.64307	-1.2461	0.4268	-0.0068274	0.99682
contig08979	H33_RATRecName: Full=Histone H3.3	0.37269	0.44635	-0.10632	0.9938	0.31943	0.80149	0.71352	0.040717	0.28955	0.54285	-0.51444	0.23582	-0.11326	0.99997	0.097797	0.92882	0.6004	0.02547	0.51786	0.12385	0.36607	0.51245	0.68717	0.056187
contig08986	SC5A8_HUMANRecName: Full=Sodium-coupled monocarboxylate transporter 1; AltName: Full=Apical iodide transporter; AltName: Full=Electrogenic sodium monocarboxylate cotransporter; AltName: Full=Sodium iodide-related cotransporter; AltName: Full=Solute carrier family 5 member 8	1.1746	0.043025	0.66944	0.63784	-0.84206	0.32485	-0.98651	0.054716	0.29901	0.71114	-0.42008	0.51838	-0.10155	0.99997	0.68396	0.35359	0.54331	0.15491	0.31274	0.61994	-0.2094	0.85368	0.13058	0.85894
contig08989	---NA---	1.3493	0.24744	-0.77244	0.90509	0.35211	0.96275	0.34667	0.85464	-1.0468	0.35527	-0.50992	0.68918	-0.20352	0.99997	0.24652	0.94335	1.5867	0.045519	1.455	0.10318	0.75104	0.73189	0.72085	0.54691
contig08991	SRPR_MOUSERecName: Full=Signal recognition particle receptor subunit alpha; Short=SR-alpha; AltName: Full=Docking protein alpha; Short=DP-alpha	0.70124	0.54154	-0.45648	0.96334	-0.19284	0.97463	0.0074828	0.99637	0.34978	0.80178	0.072175	0.95937	-0.3566	0.99997	0.10739	0.97476	1.8223	0.0034093	0.39098	0.69537	-0.39308	0.80792	0.3697	0.70055
contig08994	FLNA_DROMERecName: Full=Filamin-A; Short=FLN-A; AltName: Full=Actin-binding protein 280; Short=ABP-280; AltName: Full=Filamin-1; AltName: Full=Filamin1	1.0657	0.34264	0.8846	0.81468	-0.62152	0.88547	-0.37764	0.79455	-0.16959	0.93432	0.58999	0.60134	0.16352	0.99997	1.027	0.48868	1.9334	0.0050353	0.36684	0.7523	-0.1614	0.95309	0.56354	0.62723
contig09001	---NA---	0.6127	0.26052	0.068316	0.99454	-0.3307	0.87598	-0.60373	0.21021	0.32546	0.59913	0.20196	0.74519	0.026358	0.99997	0.15577	0.89803	0.72196	0.030234	-0.029212	0.97188	-0.1297	0.90419	0.056456	0.93484
contig09006	NU107_MOUSERecName: Full=Nuclear pore complex protein Nup107; AltName: Full=107 kDa nucleoporin; AltName: Full=Nucleoporin Nup107	-0.35356	0.82697	-0.51169	0.95197	-0.31668	0.95026	0.21392	0.88404	-0.32254	0.82339	0.23908	0.84495	0.5304	0.99997	-0.053669	0.98903	1.4792	0.013091	0.33776	0.74413	0.41251	0.7952	0.31841	0.74963
contig09007	---NA---	0.57451	0.29488	-0.18041	0.98863	-0.024182	0.99622	0.2023	0.77631	0.54836	0.28512	-0.20768	0.73521	-0.097801	0.99997	0.071324	0.96714	0.70218	0.033503	0.36209	0.45626	-0.28948	0.72965	0.27486	0.59196
contig09013	---NA---	0.61532	0.33458	-0.31499	0.9585	-0.017623	0.99794	0.18006	0.83773	0.32892	0.65467	0.093892	0.91322	-0.067557	0.99997	-0.17621	0.89709	0.94175	0.013387	0.69977	0.14144	0.015176	0.99179	0.24076	0.69351
contig09017	LRP5_MOUSERecName: Full=Low-density lipoprotein receptor-related protein 5; Short=LRP-5; AltName: Full=Low-density lipoprotein receptor-related protein 7; Short=LRP-7; Flags: Precursor	0.88699	0.35041	-0.56729	0.92601	-0.032317	0.99719	-0.17474	0.90239	0.56078	0.58038	0.62605	0.49739	-0.35524	0.99997	-0.76464	0.49873	1.3009	0.020236	-0.068803	0.95741	-0.65388	0.59725	-0.060369	0.95872
contig09018	ECHB_BOVINRecName: Full=Trifunctional enzyme subunit beta, mitochondrial; AltName: Full=TP-beta; Includes: RecName: Full=3-ketoacyl-CoA thiolase; AltName: Full=Acetyl-CoA acyltransferase; AltName: Full=Beta-ketothiolase; Flags: Precursor	0.65215	0.45208	0.040374	0.99719	0.083818	0.99086	0.46131	0.58971	0.18382	0.88985	-0.30436	0.72835	0.2512	0.99997	1.0198	0.22299	1.291	0.008066	0.79849	0.1935	0.6527	0.50944	1.2041	0.058334
contig09024	---NA---	0.69201	0.080841	0.39603	0.7416	0.29825	0.82349	0.56323	0.12261	0.51199	0.19997	-0.21243	0.65102	0.060675	0.99997	0.30588	0.59867	0.62547	0.019229	0.55016	0.09605	0.65879	0.17826	0.82244	0.021001
contig09025	RENR_HUMANRecName: Full=Renin receptor; AltName: Full=ATPase H(+)-transporting lysosomal accessory protein 2; AltName: Full=ATPase H(+)-transporting lysosomal-interacting protein 2; AltName: Full=ER-localized type I transmembrane adaptor; AltName: Full=Embryonic liver differentiation factor 10; AltName: Full=N14F; AltName: Full=Renin/prorenin receptor; AltName: Full=Vacuolar ATP synthase membrane…	0.77281	0.13731	0.45936	0.80631	0.58898	0.53081	0.91622	0.036708	0.48024	0.37615	-0.43878	0.42834	0.3862	0.99997	0.46083	0.50338	0.70941	0.035588	0.4974	0.27702	-0.24675	0.78355	0.21757	0.69248
contig09026	MCAT_MACFARecName: Full=Mitochondrial carnitine/acylcarnitine carrier protein; AltName: Full=Carnitine/acylcarnitine translocase; Short=CAC; AltName: Full=Solute carrier family 25 member 20	0.69838	0.59643	0.27494	0.9938	0.52696	0.91609	1.1946	0.19983	0.44889	0.75077	-0.14804	0.92003	-0.16868	0.99997	1.2101	0.31412	1.3612	0.035378	0.946	0.28136	0.79863	0.5707	1.5251	0.077838
contig09027	PSD12_MOUSERecName: Full=26S proteasome non-ATPase regulatory subunit 12; AltName: Full=26S proteasome regulatory subunit RPN5; AltName: Full=26S proteasome regulatory subunit p55	0.61219	0.49541	-0.12807	0.99383	-0.10269	0.98698	0.047344	0.97208	0.39694	0.67483	-0.11283	0.91732	-0.13648	0.99997	-0.17587	0.92749	1.2472	0.010111	0.73682	0.24276	0.19125	0.90015	0.82631	0.20031
contig09034	S28A3_EPTSTRecName: Full=Solute carrier family 28 member 3; AltName: Full=Concentrative Na(+)-nucleoside cotransporter 3; AltName: Full=hfCNT	-0.32423	0.86955	-0.024239	0.99864	0.81032	0.8946	1.68	0.16972	-0.25578	0.89197	-0.36557	0.80143	0.29836	0.99997	0.71295	0.74454	2.0523	0.0052389	1.0761	0.16933	1.045	0.60669	1.2065	0.31378
contig09037	EBPL_MOUSERecName: Full=Emopamil-binding protein-like; AltName: Full=Emopamil-binding-related protein	0.42761	0.44247	-0.40008	0.8319	0.28634	0.88882	0.20507	0.7456	0.28567	0.62362	-0.18007	0.75551	-0.41524	0.97994	-0.34279	0.61744	1.053	0.0016665	0.741	0.051371	0.32283	0.65054	0.5713	0.16906
contig09042	AMRP_HUMANRecName: Full=Alpha-2-macroglobulin receptor-associated protein; Short=Alpha-2-MRAP; AltName: Full=Low density lipoprotein receptor-related protein-associated protein 1; Short=RAP; Flags: Precursor	0.50961	0.17526	0.096582	0.9938	0.29764	0.78377	0.29499	0.46076	0.57665	0.11299	-0.20702	0.6185	-0.11458	0.99997	0.03678	0.98063	0.5924	0.014758	0.57203	0.053921	0.41479	0.38387	0.76868	0.017627
contig09050	S14L2_HUMANRecName: Full=SEC14-like protein 2; AltName: Full=Alpha-tocopherol-associated protein; Short=TAP; Short=hTAP; AltName: Full=Squalene transfer protein; AltName: Full=Supernatant protein factor; Short=SPF	1.538	0.00065194	1.0411	0.055156	0.87856	0.14879	0.94841	0.031152	1.2759	0.0067823	0.49984	0.36528	0.67407	0.59007	1.171	0.013705	1.051	0.0035649	1.0296	0.016367	0.71445	0.27482	1.1787	0.010788
contig09057	NP1L4_MOUSERecName: Full=Nucleosome assembly protein 1-like 4	0.46578	0.27058	0.11604	0.99367	0.12538	0.95819	0.10494	0.86739	0.53458	0.17135	-0.014605	0.98229	-0.048459	0.99997	-0.10932	0.91056	0.91581	0.0012661	0.37275	0.28475	0.050954	0.95874	0.22051	0.57538
contig09058	PA2G4_RATRecName: Full=Proliferation-associated protein 2G4	0.80538	0.077597	0.051929	0.99454	0.21081	0.93429	0.25349	0.6643	0.45328	0.35098	0.04721	0.94877	-0.24607	0.99997	-0.06849	0.96564	1.0764	0.0013877	0.68378	0.072014	0.12013	0.90308	0.44023	0.30074
contig09062	---NA---	0.8121	0.15948	0.060231	0.99476	0.59616	0.59255	1.1177	0.018552	0.74616	0.18193	0.16022	0.83445	-0.17736	0.99997	-0.12789	0.9344	1.3154	0.001318	0.93228	0.043054	0.39382	0.6474	0.82275	0.095933
contig09068	---NA---	-0.50082	0.74465	-0.46893	0.9714	-0.58033	0.91667	-0.10915	0.95511	0.63603	0.74629	0.46509	0.6854	0.27195	0.99997	-0.20814	0.93923	1.6348	0.023808	-0.0043085	0.99755	-0.040027	0.98851	-0.2257	0.84842
contig09075	DCOR_MOUSERecName: Full=Ornithine decarboxylase; Short=ODC	0.321	0.61412	-0.12161	0.9938	0.23963	0.92409	0.52387	0.24644	0.44742	0.36322	-0.56165	0.26059	0.16032	0.99997	0.65061	0.23565	0.80595	0.010338	0.7819	0.040911	0.27439	0.72291	0.76635	0.063002
contig09080	SYEP_DROMERecName: Full=Bifunctional glutamate/proline--tRNA ligase; AltName: Full=Bifunctional aminoacyl-tRNA synthetase; Includes: RecName: Full=Glutamate--tRNA ligase; AltName: Full=Glutamyl-tRNA synthetase; Includes: RecName: Full=Proline--tRNA ligase; AltName: Full=Prolyl-tRNA synthetase; Short=ProRS	-0.090688	0.96927	0.33128	0.98482	-0.89517	0.71337	0.067216	0.97021	-0.24907	0.91857	-0.47875	0.634	0.40081	0.99997	-0.29245	0.90015	1.274	0.028036	0.9061	0.23391	-0.025244	0.9921	0.5086	0.61196
contig09082	LEGLA_XENLARecName: Full=Galectin-related protein A; AltName: Full=Lectin galactoside-binding-like protein A	0.61607	0.064933	0.26635	0.87366	0.30319	0.7332	0.35087	0.29759	0.65134	0.050179	0.11581	0.79069	0.010755	0.99997	0.16177	0.79554	0.74535	0.0020924	0.54252	0.05047	0.29112	0.54009	0.36671	0.22979
contig09090	CARM1_DROGRRecName: Full=Histone-arginine methyltransferase CARMER	0.33215	0.60784	-0.26367	0.9585	0.53634	0.54436	0.59545	0.18451	0.29127	0.6279	-0.44964	0.37769	-0.021638	0.99997	0.0067444	0.99724	0.67371	0.032318	0.51706	0.20949	0.44781	0.4927	0.76892	0.067767
contig09092	---NA---	-0.50063	0.60945	-1.2837	0.1239	-0.68365	0.69267	-0.72732	0.31479	-0.21962	0.8614	-0.85305	0.27067	-1.2966	0.18147	-1.6298	0.013709	-0.78503	0.093591	-1.5215	0.011397	-0.54709	0.60741	-0.6555	0.32452
contig09095	ATIF1_MOUSERecName: Full=ATPase inhibitor, mitochondrial; AltName: Full=ATP synthase F1 subunit epsilon; AltName: Full=Inhibitor of F(1)F(o)-ATPase; Short=IF(1); Short=IF1; Flags: Precursor	1.0496	0.071618	0.9086	0.2884	0.57598	0.676	0.98827	0.054546	0.90649	0.1237	0.2263	0.76017	0.27635	0.99997	0.71465	0.32999	1.5736	0.0004535	1.0368	0.03185	0.056202	0.9686	0.69102	0.19332
contig09099	CP2D3_RATRecName: Full=Cytochrome P450 2D3; AltName: Full=CYPIID3; AltName: Full=Cytochrome P450-DB3; AltName: Full=Debrisoquine 4-hydroxylase	0.92454	0.27009	-0.085359	0.99454	0.90157	0.51592	0.82901	0.27525	0.98118	0.2026	0.2974	0.75814	-0.067642	0.99997	0.4538	0.72052	1.1675	0.022816	0.60399	0.4093	0.49471	0.68999	1.3337	0.051124
contig09100	---NA---	2.3433	0.068802	3.4064	0.0040903	3.9983	0.0020443	4.2049	0.00051423	2.9296	0.018761	3.8014	0.001191	4.3851	0.00012946	4.8228	1.0433e-05	3.7457	0.00022215	4.0537	0.0001733	3.7832	0.001931	3.5314	0.0024872
contig09101	---NA---	-0.89816	0.5511	-0.46246	0.98162	1.1661	0.84292	1.2651	0.49168	-0.60749	0.74115	-0.37376	0.80504	-0.25394	0.99997	-0.58926	0.81056	2.2473	0.039956	0.30631	0.85461	0.15256	0.96552	0.10936	0.95169
contig09102	PTBP1_MOUSERecName: Full=Polypyrimidine tract-binding protein 1; Short=PTB; AltName: Full=Heterogeneous nuclear ribonucleoprotein I; Short=hnRNP I	0.39541	0.55831	-0.36734	0.9102	0.070596	0.98846	0.032613	0.9734	-0.25069	0.72953	-0.28094	0.64054	-0.20572	0.99997	-0.1269	0.92739	1.0844	0.002894	0.27508	0.61747	0.049263	0.96852	0.37595	0.44682
contig09104	---NA---	-0.68668	0.52934	-1.5019	0.13169	-0.92262	0.57717	-0.30809	0.80714	-0.92303	0.29258	-1.616	0.062403	-2.8724	0.00012562	-3.6471	4.8785e-07	-2.9873	1.6096e-05	-3.3749	1.7443e-06	-1.3573	0.19696	-2.2383	0.0032185
contig09110	NAGAB_CHICKRecName: Full=Alpha-N-acetylgalactosaminidase; AltName: Full=Alpha-galactosidase B	0.098128	0.96644	-0.32487	0.98482	0.97099	0.79698	1.1196	0.38086	0.27239	0.85418	0.98736	0.28352	-0.24273	0.99997	-0.57504	0.66647	1.4852	0.010796	0.85793	0.26236	0.26884	0.87485	0.17506	0.87324
contig09112	4CL_PINTARecName: Full=4-coumarate--CoA ligase; Short=4CL; AltName: Full=4-coumaroyl-CoA synthase	0.31408	0.81446	0.26686	0.98866	0.39497	0.92193	0.87793	0.22643	0.44007	0.64948	0.57274	0.48379	0.085044	0.99997	-0.42558	0.73431	1.0541	0.033586	0.53071	0.47133	-0.22033	0.88518	-0.30597	0.7075
contig09113	NSRP1_DANRERecName: Full=Nuclear speckle splicing regulatory protein 1; AltName: Full=Coiled-coil domain-containing protein 55	0.28224	0.86919	-0.061304	0.99687	0.39174	0.95906	0.8063	0.6172	0.85103	0.36584	-0.41307	0.73199	-0.092575	0.99997	-0.10704	0.98596	2.6566	0.0054679	0.15722	0.9086	0.34888	0.86897	-0.83978	0.36803
contig09126	---NA---	0.44483	0.68993	0.17574	0.9938	0.085197	0.99086	-0.44499	0.62713	0.022273	0.99031	0.22264	0.82553	0.4051	0.99997	0.71149	0.47173	1.3641	0.0075281	0.62942	0.36679	0.35389	0.78986	0.78645	0.24806
contig09142	SCLY_XENTRRecName: Full=Selenocysteine lyase	0.33845	0.54154	-0.093748	0.9938	0.26183	0.89221	0.2534	0.62944	0.60667	0.15859	-0.15936	0.77052	-0.047861	0.99997	-0.19174	0.81672	0.58736	0.038058	0.33392	0.41326	0.30178	0.64703	0.57948	0.12785
contig09145	COQ6_XENTRRecName: Full=Ubiquinone biosynthesis monooxygenase COQ6, mitochondrial; AltName: Full=Coenzyme Q10 monooxygenase 6; Flags: Precursor	0.34727	0.85849	0.49868	0.97048	-0.28831	0.96995	0.71918	0.59978	0.4017	0.83006	0.34177	0.79632	0.44517	0.99997	0.19074	0.95867	1.77	0.021028	0.6967	0.48995	-0.087309	0.97773	0.064231	0.9686
contig09154	CALR_MOUSERecName: Full=Calreticulin; AltName: Full=CRP55; AltName: Full=Calregulin; AltName: Full=Endoplasmic reticulum resident protein 60; Short=ERp60; AltName: Full=HACBP; Flags: Precursor	0.70219	0.41438	-0.085384	0.99454	-0.0042772	0.99945	0.62409	0.43024	0.32645	0.75952	-0.56673	0.47471	-0.094846	0.99997	0.39965	0.74819	0.96774	0.04386	0.8515	0.16896	0.56667	0.59871	1.0431	0.10563
contig09173	ZFP26_MOUSERecName: Full=Zinc finger protein 26; Short=Zfp-26; AltName: Full=Protein mKR3	0.045092	0.99108	1.116	0.85972	-1.0781	0.92409	-0.18501	0.96101	1.1835	0.48475	0.93177	0.53919	0.42714	0.99997	-0.18766	0.97201	2.4025	0.042053	0.29298	0.8685	-0.98774	0.67617	-0.78977	0.68531
contig09176	UD2A3_HUMANRecName: Full=UDP-glucuronosyltransferase 2A3; Short=UDPGT 2A3; Flags: Precursor	2.5991	0.0060654	2.204	0.03742	0.66886	0.87792	0.8432	0.46175	0.97426	0.37677	1.2166	0.27462	1.4848	0.4652	2.0868	0.035333	2.5203	0.0010353	1.9798	0.021435	0.91356	0.5268	1.0014	0.29347
contig09179	PSMD4_BOVINRecName: Full=26S proteasome non-ATPase regulatory subunit 4; AltName: Full=26S proteasome regulatory subunit RPN10	0.49095	0.27927	-0.04228	0.99519	-0.091636	0.97429	0.1905	0.7365	0.10031	0.89874	-0.19659	0.69301	-0.20377	0.99997	0.080808	0.94795	0.82104	0.0045028	0.59233	0.08551	0.27278	0.68275	0.50271	0.18054
contig09183	---NA---	-0.40636	0.68908	-0.67941	0.73793	-1.3803	0.046096	-1.3123	0.024248	-1.0626	0.11784	-0.86866	0.23395	-0.2668	0.99997	-0.39074	0.73121	-0.2469	0.58531	-0.33169	0.65614	-0.4239	0.70313	-0.5785	0.36694
contig09191	EFHC2_DANRERecName: Full=EF-hand domain-containing family member C2	0.41332	0.78263	-0.60944	0.92229	-0.25051	0.96522	-0.65395	0.51643	-0.031261	0.98866	-0.94057	0.31748	-0.058038	0.99997	0.26394	0.90254	1.2223	0.03648	0.072327	0.95757	-0.10033	0.96396	0.27093	0.7926
contig09192	OXA1L_MOUSERecName: Full=Mitochondrial inner membrane protein OXA1L; AltName: Full=Oxidase assembly 1-like protein; Short=OXA1-like protein; Flags: Precursor	0.1582	0.91368	-0.6853	0.7188	0.82671	0.46756	0.50332	0.50982	-0.3378	0.71432	-0.41653	0.583	-0.40204	0.99997	0.20969	0.89598	0.93373	0.035452	0.75913	0.18612	0.12834	0.93503	0.63534	0.30507
contig09194	HMG2_DROMERecName: Full=High mobility group protein DSP1; AltName: Full=Protein dorsal switch 1	0.091301	0.94819	-0.31084	0.9585	-0.30273	0.92148	-0.65943	0.2333	-0.11542	0.91916	-1.1548	0.046651	0.13511	0.99997	0.044152	0.98715	0.16574	0.66384	0.27495	0.66016	-0.041149	0.97663	0.56505	0.28056
contig09197	FAS1_SCHAMRecName: Full=Fasciclin-1; AltName: Full=Fasciclin I; Short=FAS I; Short=FCN; Flags: Precursor	0.54101	0.2848	-0.084859	0.9938	0.016849	0.99744	0.50361	0.2688	0.48313	0.316	-0.27333	0.60277	0.024082	0.99997	-0.17769	0.85815	0.71975	0.019816	0.69467	0.067834	0.36323	0.59481	0.54457	0.19152
contig09219	NRDC_MOUSERecName: Full=Nardilysin; AltName: Full=N-arginine dibasic convertase; Short=NRD convertase; Short=NRD-C; AltName: Full=Nardilysin convertase; Flags: Precursor	0.74787	0.64291	0.15218	0.99454	0.66173	0.92363	1.0638	0.60719	0.91446	0.54249	0.3949	0.81608	-1.4217	0.9069	-0.80452	0.72873	2.3521	0.030932	0.26589	0.858	-1.1453	0.57043	-1.4943	0.19831
contig09221	---NA---	0.34882	0.55893	0.005098	0.99879	-0.012198	0.99794	0.044595	0.95705	0.4579	0.33872	0.047148	0.94807	-0.037623	0.99997	-0.26896	0.72029	1.0131	0.0019912	0.4937	0.21105	0.19224	0.81847	0.46245	0.26842
contig09224	---NA---	0.36122	0.46058	-0.12623	0.99367	0.010201	0.99794	0.17657	0.74851	0.45903	0.25881	-0.18843	0.69483	-0.043139	0.99997	0.17388	0.82637	1.0559	0.00051838	0.65745	0.046395	0.09871	0.91089	0.48976	0.17449
contig09226	ZN567_BOVINRecName: Full=Zinc finger protein 567	0.44745	0.6612	-0.42072	0.94757	0.06329	0.99312	0.61805	0.41568	0.29363	0.78313	0.22745	0.80751	-0.62381	0.9873	-0.628	0.51273	1.2163	0.010724	0.61812	0.34239	-0.10618	0.95153	0.3199	0.67188
contig09233	---NA---	0.69487	0.1973	0.44834	0.82437	0.45663	0.73666	0.84074	0.060633	0.5992	0.24495	0.62152	0.25982	-0.049151	0.99997	0.10003	0.94743	1.3724	0.00043815	1.0599	0.013313	0.54294	0.42729	0.8992	0.047707
contig09234	---NA---	0.49253	0.50452	0.24223	0.98162	0.76112	0.40752	1.25	0.01097	0.60033	0.32539	0.35456	0.59206	0.34064	0.99997	0.36606	0.69738	1.3682	0.0013459	0.9595	0.045734	0.51858	0.52263	0.41438	0.46227
contig09236	1433Z_BOMMORecName: Full=14-3-3 protein zeta	0.64707	0.28419	-0.040503	0.99654	0.018966	0.99793	-0.3213	0.63728	0.070541	0.95391	-0.47449	0.42885	0.19146	0.99997	0.49215	0.51186	0.86079	0.01968	0.7196	0.11665	0.56732	0.44985	0.78574	0.1083
contig09239	---NA---	0.35354	0.69734	-0.072996	0.99454	0.61023	0.65661	1.2966	0.01097	0.47899	0.48419	-0.11785	0.89527	0.10405	0.99997	0.3557	0.72169	1.4844	0.00094117	1.1146	0.025755	0.13452	0.9207	0.45273	0.43506
contig09242	GXCDD_DICDIRecName: Full=Guanine exchange factor for Rac 30	0.26785	0.89772	-0.55721	0.9585	0.10921	0.9913	0.20412	0.90429	0.69985	0.55381	0.82322	0.44737	-0.45851	0.99997	-0.55297	0.78512	1.568	0.019014	0.60574	0.55592	-0.063395	0.97982	0.44394	0.679
contig09246	---NA---	1.0565	0.23115	-0.12826	0.99454	0.26383	0.95826	0.18579	0.89172	0.39115	0.73754	-0.013823	0.99081	-0.42039	0.99997	-0.32482	0.85172	1.3802	0.012502	0.61347	0.43814	0.13093	0.94716	0.82806	0.27157
contig09263	RS25_BRABERecName: Full=40S ribosomal protein S25	-0.46901	0.61422	0.2266	0.99095	0.31613	0.93429	1.3584	0.018485	0.28315	0.78286	0.024235	0.98299	0.26974	0.99997	0.067362	0.98129	0.57609	0.19091	0.99075	0.077415	1.5098	0.035301	1.0256	0.087345
contig09275	FMO5_RABITRecName: Full=Dimethylaniline monooxygenase	1.0387	0.54913	0.35157	0.9938	-0.66579	0.93429	0.44177	0.86585	1.0386	0.67483	1.806	0.21026	1.9255	0.77514	1.2244	0.55863	2.0395	0.040875	0.4555	0.86133	1.0728	0.63676	1.0386	0.51888
contig09278	DDX28_MOUSERecName: Full=Probable ATP-dependent RNA helicase DDX28; AltName: Full=Mitochondrial DEAD box protein 28	0.25386	0.73208	0.064868	0.99454	0.12605	0.96725	0.30351	0.59366	0.61705	0.19123	0.24135	0.66844	-0.0038137	0.99997	-0.25454	0.75515	0.7683	0.015651	0.24716	0.62837	0.097879	0.92773	0.25082	0.60927
contig09279	RGN_RATRecName: Full=Regucalcin; Short=RC; AltName: Full=Gluconolactonase; Short=GNL; AltName: Full=Senescence marker protein 30; Short=SMP-30	1.0106	0.44178	0.18377	0.99454	0.24488	0.97356	0.64727	0.62829	0.35908	0.84679	-0.90938	0.44068	0.18057	0.99997	1.8724	0.10397	1.5022	0.037182	1.1154	0.24616	0.88441	0.57708	1.6293	0.090302
contig09289	NCPR_BOVINRecName: Full=NADPH--cytochrome P450 reductase; Short=CPR; Short=P450R	0.90201	0.21285	0.44746	0.92842	0.25825	0.94689	0.43903	0.58818	0.48951	0.53973	0.51216	0.49014	-0.38086	0.99997	-0.26398	0.87792	1.2989	0.0056785	0.7397	0.20873	-0.13676	0.93903	0.66891	0.34585
contig09293	CLPX_MOUSERecName: Full=ATP-dependent Clp protease ATP-binding subunit clpX-like, mitochondrial; Flags: Precursor	0.15239	0.81355	-0.022065	0.99719	0.21036	0.89968	0.50926	0.12399	0.57057	0.11672	-0.15547	0.72593	-0.093416	0.99997	0.21629	0.71668	0.85622	0.001255	0.67615	0.023909	0.43851	0.35739	0.81597	0.012084
contig09297	AOXD_RATRecName: Full=Aldehyde oxidase 4; AltName: Full=Aldehyde oxidase homolog 2; AltName: Full=Azaheterocycle hydroxylase 4; AltName: Full=Retinal oxidase	1.2371	0.059396	1.5605	0.01326	0.4977	0.81871	0.62542	0.35975	0.44427	0.57386	0.30826	0.69532	1.4551	0.18478	2.4486	8.6466e-05	2.8178	6.029e-07	2.7872	8.646e-07	1.147	0.26356	1.4483	0.027882
contig09300	AAKG2_MOUSERecName: Full=5'-AMP-activated protein kinase subunit gamma-2; Short=AMPK gamma2; Short=AMPK subunit gamma-2	0.0091564	0.99445	-0.22462	0.97145	0.37611	0.78991	0.21544	0.73015	0.52858	0.25984	0.27173	0.60568	-0.24029	0.99997	-0.62192	0.2605	0.90891	0.0046182	0.38755	0.37025	0.21398	0.79602	0.39077	0.36967
contig09304	PPP6_MOUSERecName: Full=Serine/threonine-protein phosphatase 6 catalytic subunit; Short=PP6C	0.12441	0.86446	-0.072038	0.9938	0.21209	0.90647	0.30976	0.46017	0.41885	0.28282	-0.088826	0.86916	-0.042343	0.99997	-0.12667	0.88531	0.5385	0.032014	0.2198	0.57845	-0.01868	0.98576	0.10264	0.81885
contig09309	ASPH2_XENTRRecName: Full=Aspartate beta-hydroxylase domain-containing protein 2	0.27329	0.73437	-0.14231	0.9938	0.11045	0.975	0.46823	0.38727	0.44199	0.43125	0.1452	0.83701	-0.12237	0.99997	-0.36059	0.6438	0.89808	0.0098454	0.43494	0.36353	0.5189	0.45792	0.65244	0.15653
contig09316	---NA---	0.43164	0.43678	-0.22183	0.97207	0.41805	0.72795	0.26628	0.64237	0.35947	0.49292	-0.1375	0.82582	0.033395	0.99997	0.016571	0.99343	0.7029	0.022562	0.70961	0.062038	0.86433	0.11043	1.1075	0.0076743
contig09318	SELT_HUMANRecName: Full=Thioredoxin reductase-like selenoprotein T; Short=SelT; Flags: Precursor	0.56505	0.20865	0.56313	0.45921	0.62319	0.2921	0.79158	0.028842	0.83088	0.04481	0.14436	0.79223	0.15422	0.99997	0.4959	0.34852	1.2584	0.00016503	0.92633	0.0093135	0.32053	0.61106	0.89618	0.017798
contig09328	PHF12_HUMANRecName: Full=PHD finger protein 12; AltName: Full=PHD factor 1; Short=Pf1	0.40752	0.8778	-0.11996	0.99556	-0.41148	0.96088	-0.4207	0.85485	0.71093	0.77802	1.3523	0.30009	-1.1589	0.99997	-1.779	0.54012	2.4008	0.038116	-1.0164	0.43118	-0.47898	0.89873	-1.0076	0.55246
contig09329	---NA---	-0.0087355	0.998	0.10211	0.99556	0.049854	0.99686	0.96611	0.4738	0.35805	0.86807	0.46555	0.72496	-1.3551	0.99997	-1.0939	0.63611	1.7375	0.017526	0.2322	0.87127	-1.0104	0.67909	-1.2823	0.37438
contig09338	---NA---	0.43822	0.60666	0.38273	0.94271	0.24735	0.94592	0.73496	0.22426	0.13969	0.90911	-0.13193	0.88517	0.25916	0.99997	0.21671	0.87797	0.80467	0.05065	1.1126	0.030156	0.72875	0.37946	0.78093	0.16408
contig09345	PTH2_BOVINRecName: Full=Peptidyl-tRNA hydrolase 2, mitochondrial; Short=PTH 2; AltName: Full=Bcl-2 inhibitor of transcription; Flags: Precursor	0.21182	0.95663	0.3472	0.9938	0.13393	0.99374	0.43964	0.85901	0.63502	0.78909	2.247	0.17877	0.36352	0.99997	-0.83751	0.84736	4.0626	0.00080645	0.91084	0.51453	0.17225	0.9665	0.31974	0.87131
contig09348	BAP31_PONABRecName: Full=B-cell receptor-associated protein 31; Short=BCR-associated protein 31; Short=Bap31	0.64204	0.11505	0.58112	0.37641	0.30437	0.82148	0.36257	0.39975	0.86236	0.02685	0.27638	0.54053	0.2766	0.99997	0.39749	0.45341	0.87579	0.0024042	0.53522	0.11051	0.37819	0.49792	0.63107	0.077838
contig09350	---NA---	0.28928	0.69761	0.0055453	0.99879	0.43717	0.74634	0.72877	0.10321	0.6038	0.22669	-0.16172	0.80405	0.07782	0.99997	0.71759	0.21364	1.3642	0.00034361	0.91343	0.025563	0.35741	0.6369	1.0106	0.022064
contig09363	BIRC6_HUMANRecName: Full=Baculoviral IAP repeat-containing protein 6; AltName: Full=BIR repeat-containing ubiquitin-conjugating enzyme; Short=BRUCE; AltName: Full=RING-type E3 ubiquitin transferase BIRC6; AltName: Full=Ubiquitin-conjugating BIR domain enzyme apollon; Short=APOLLON	1.1324	0.24187	0.43195	0.97207	0.42466	0.93429	0.66616	0.51488	0.83431	0.38201	-0.27131	0.82208	0.12765	0.99997	0.072385	0.98801	1.5176	0.012219	1.9616	0.0094771	1.2933	0.31855	1.4897	0.092745
contig09367	---NA---	0.28349	0.60829	-0.25129	0.94095	0.067072	0.98325	0.20582	0.69641	0.47939	0.24059	-0.19166	0.69295	-0.106	0.99997	-0.05742	0.96772	0.7098	0.0098445	0.32134	0.40416	-0.613	0.22727	0.15893	0.72268
contig09385	TPIS_CHICKRecName: Full=Triosephosphate isomerase; Short=TIM; AltName: Full=Methylglyoxal synthase; AltName: Full=Triose-phosphate isomerase	1.2191	0.043373	0.6585	0.68317	0.84123	0.3699	1.0627	0.046144	0.78558	0.20155	-0.099366	0.91491	0.1952	0.99997	0.7349	0.33977	0.96908	0.018436	0.71282	0.17287	0.037733	0.98084	0.53209	0.35628
contig09388	AT1A2_PIGRecName: Full=Sodium/potassium-transporting ATPase subunit alpha-2; Short=Na(+)/K(+) ATPase alpha-2 subunit; AltName: Full=Sodium pump subunit alpha-2; Flags: Precursor	-0.0121	0.9959	-1.2935	0.33348	-0.087673	0.99306	0.39249	0.77144	-0.45085	0.69485	-0.43117	0.67183	-0.086665	0.99997	-0.40175	0.85815	1.4145	0.042949	0.22313	0.8581	0.43957	0.85881	0.17069	0.88868
contig09399	CANT1_RATRecName: Full=Soluble calcium-activated nucleotidase 1; Short=SCAN-1; AltName: Full=Apyrase homolog	0.96334	0.34166	1.0026	0.65343	1.1722	0.52079	1.3789	0.13633	0.12127	0.9507	1.3483	0.155	1.2154	0.9799	1.7494	0.24596	2.6586	0.00020808	1.7379	0.020823	0.82849	0.6829	1.0242	0.39182
contig09404	ALDH2_HUMANRecName: Full=Aldehyde dehydrogenase, mitochondrial; AltName: Full=ALDH class 2; AltName: Full=ALDH-E2; AltName: Full=ALDHI; Flags: Precursor	0.36722	0.55163	0.17009	0.98865	0.45931	0.68218	0.4877	0.3033	0.45372	0.36494	0.046379	0.9511	0.48557	0.89686	0.88173	0.063655	0.78946	0.013103	0.68934	0.077489	0.21538	0.80036	0.44401	0.31001
contig09420	RL19_RATRecName: Full=60S ribosomal protein L19	0.1331	0.90079	-0.32502	0.93753	0.03652	0.99544	0.76835	0.093463	0.1381	0.88304	-0.30795	0.59445	-0.20354	0.99997	0.12671	0.92686	0.87903	0.010795	0.87471	0.036699	0.52582	0.44792	0.84775	0.061239
contig09422	MOT2_RATRecName: Full=Monocarboxylate transporter 2; Short=MCT 2; AltName: Full=Solute carrier family 16 member 7	0.44298	0.55879	-0.19196	0.99099	-0.34781	0.89373	-0.48239	0.44706	-0.018987	0.98928	-0.97914	0.099132	-0.074513	0.99997	0.71135	0.31754	0.77122	0.042949	0.56198	0.2787	0.60686	0.43393	1.089	0.033232
contig09428	UNC22_CAEELRecName: Full=Twitchin; AltName: Full=Uncoordinated protein 22	0.2099	0.90819	-0.53312	0.94095	0.56311	0.87552	0.70821	0.45143	-0.3624	0.7769	-1.0744	0.2428	0.75805	0.9873	0.99872	0.35082	0.82015	0.13971	1.396	0.047252	1.2667	0.23733	1.2837	0.088675
contig09439	ATX1_MOUSERecName: Full=Ataxin-1; AltName: Full=Spinocerebellar ataxia type 1 protein homolog	0.71743	0.26393	0.16191	0.9938	0.28059	0.93429	0.39867	0.56718	0.90988	0.1237	0.54889	0.38764	-0.05499	0.99997	-0.23629	0.84962	0.95424	0.016088	0.53529	0.32188	0.5034	0.54806	0.36972	0.52968
contig09441	SRP09_MACFARecName: Full=Signal recognition particle 9 kDa protein; Short=SRP9	0.63138	0.44178	-0.084705	0.99454	0.49712	0.83215	0.85813	0.18172	0.79992	0.24417	0.26266	0.75939	-0.097341	0.99997	-0.32427	0.79854	1.0606	0.019816	0.84362	0.1405	0.63864	0.49558	0.66284	0.29028
contig09445	NOP58_HUMANRecName: Full=Nucleolar protein 58; AltName: Full=Nucleolar protein 5	0.27485	0.62931	0.016665	0.99792	0.052575	0.98919	0.26022	0.59542	0.54136	0.184	-0.049684	0.93768	0.0020937	0.99997	-0.23766	0.72533	0.78631	0.0052472	0.43902	0.21492	0.10496	0.90439	0.29183	0.4574
contig09446	COG8_HUMANRecName: Full=Conserved oligomeric Golgi complex subunit 8; Short=COG complex subunit 8; AltName: Full=Component of oligomeric Golgi complex 8	0.049382	0.9669	0.11544	0.9938	0.2623	0.89373	0.69108	0.075126	0.64143	0.14604	0.16997	0.75711	0.17417	0.99997	0.021236	0.99162	0.88382	0.0038578	0.58552	0.10666	0.036096	0.97245	0.40795	0.31495
contig09449	MK03_HUMANRecName: Full=Mitogen-activated protein kinase 3; Short=MAP kinase 3; Short=MAPK 3; AltName: Full=ERT2; AltName: Full=Extracellular signal-regulated kinase 1; Short=ERK-1; AltName: Full=Insulin-stimulated MAP2 kinase; AltName: Full=MAP kinase isoform p44; Short=p44-MAPK; AltName: Full=Microtubule-associated protein 2 kinase; AltName: Full=p44-ERK1	1.2696	0.00065194	0.7874	0.097061	0.29383	0.85248	0.27143	0.59571	0.6563	0.12256	0.52678	0.25025	0.10374	0.99997	0.31167	0.62462	0.91095	0.0025475	0.73238	0.035726	0.16821	0.83135	0.4075	0.29895
contig09450	---NA---	0.17513	0.93362	-0.045162	0.99792	0.46021	0.92539	0.83782	0.38337	-0.055479	0.97749	0.7238	0.46737	-0.4078	0.99997	-0.26877	0.90428	1.5517	0.011893	-0.24696	0.83104	-0.19746	0.92362	0.22626	0.83821
contig09453	---NA---	0.57134	0.15014	0.42236	0.67291	0.83054	0.02721	1.1852	0.00020576	0.60364	0.11784	0.14353	0.77141	0.11248	0.99997	0.1371	0.87449	0.81838	0.0027808	0.92323	0.0048589	0.46669	0.35762	0.51384	0.1356
contig09454	VATH_DROMERecName: Full=V-type proton ATPase subunit H; Short=V-ATPase subunit H; AltName: Full=Vacuolar proton pump subunit H; AltName: Full=Vacuolar proton pump subunit SFD	0.76252	0.46755	0.0074505	0.99948	-7.3855	2.0821e-08	-6.4446	3.9384e-07	-0.19235	0.90727	-0.35726	0.82544	-0.37843	0.99997	-0.10498	0.9808	1.4562	0.024676	1.0892	0.13193	0.20972	0.92116	0.91899	0.29813
contig09466	CGT_RATRecName: Full=2-hydroxyacylsphingosine 1-beta-galactosyltransferase; AltName: Full=Ceramide UDP-galactosyltransferase; AltName: Full=Cerebroside synthase; AltName: Full=UDP-galactose-ceramide galactosyltransferase; Flags: Precursor	0.77635	0.55893	-0.7006	0.92168	-2.2677	0.01999	-2.5961	0.0021682	-0.053149	0.9811	-0.9857	0.36351	-0.32461	0.99997	0.11604	0.97619	0.7963	0.22468	0.1109	0.9408	-0.74733	0.62588	0.15834	0.90533
contig09467	ABH6B_XENLARecName: Full=Monoacylglycerol lipase abhd6-B; AltName: Full=Abhydrolase domain-containing protein 6-B	0.022519	0.99317	0.85054	0.81657	0.62949	0.87646	0.53549	0.6591	0.45911	0.73647	1.0585	0.30194	1.1616	0.85355	1.6801	0.15832	2.1423	0.0019933	0.91308	0.29181	1.0409	0.4799	1.319	0.17204
contig09469	TIM50_DANRERecName: Full=Mitochondrial import inner membrane translocase subunit TIM50; Flags: Precursor	-0.54794	0.77587	-0.30213	0.9938	-0.97963	0.81699	0.090045	0.97299	0.7191	0.61808	0.54679	0.68918	-0.44798	0.99997	2.9988	0.033171	2.154	0.060704	2.58	0.076177	1.663	0.3238	1.1954	0.319
contig09470	---NA---	0.75962	0.1312	0.029661	0.99719	0.036156	0.99529	0.5245	0.28572	0.034874	0.97457	-0.16291	0.80198	0.21216	0.99997	0.17547	0.87449	0.9325	0.006189	0.76624	0.059753	0.34578	0.65054	0.63422	0.15286
contig09471	---NA---	0.72094	0.26107	0.28222	0.9741	0.14614	0.96995	0.29816	0.69858	0.043711	0.97369	0.39923	0.54501	-0.055082	0.99997	0.45698	0.59421	1.0575	0.0085773	0.67438	0.18252	0.27217	0.79798	0.30351	0.62217
contig09472	IF2B_RABITRecName: Full=Eukaryotic translation initiation factor 2 subunit 2; AltName: Full=Eukaryotic translation initiation factor 2 subunit beta; Short=eIF-2-beta	0.64034	0.15588	0.21928	0.96995	0.44127	0.65993	0.65213	0.09901	0.85753	0.047024	0.33783	0.47999	0.025759	0.99997	0.13205	0.90132	1.1432	0.00058202	0.56559	0.12119	0.38397	0.53155	0.65778	0.089103
contig09474	PHB2_RATRecName: Full=Prohibitin-2; AltName: Full=B-cell receptor-associated protein BAP37; Short=BAP-37	0.91822	0.34855	0.97188	0.64872	0.54541	0.9058	0.75246	0.48805	1.1845	0.1737	0.29717	0.79009	0.45077	0.99997	0.65694	0.65711	1.5676	0.015974	0.68916	0.39943	0.86177	0.51974	1.2929	0.13324
contig09476	---NA---	0.83048	0.22865	0.018941	0.99792	-0.02625	0.99686	0.39838	0.61026	-0.17241	0.88354	-0.6121	0.37418	-0.03672	0.99997	0.39476	0.70657	1.3609	0.0027852	0.99957	0.058686	0.74481	0.37998	1.0993	0.05502
contig09478	XRCC4_MOUSERecName: Full=DNA repair protein XRCC4; AltName: Full=X-ray repair cross-complementing protein 4	0.32813	0.71544	-0.40194	0.92414	-0.32654	0.90827	-0.10103	0.92181	0.62139	0.30944	0.083988	0.92506	0.032389	0.99997	-0.44257	0.61073	0.91687	0.019744	0.30037	0.6372	0.066896	0.96396	0.37932	0.51466
contig09479	COA6_HUMANRecName: Full=Cytochrome c oxidase assembly factor 6 homolog	0.46857	0.42941	0.3015	0.94308	0.58044	0.51592	1.1595	0.005303	0.76163	0.1237	-0.095113	0.89647	0.22571	0.99997	0.48554	0.45379	0.89826	0.0078124	1.0055	0.014716	0.82141	0.17589	0.96965	0.027417
contig09486	ELG_DROMERecName: Full=DNA-binding protein Ets97D; Short=D-elg	0.55258	0.61106	-0.11055	0.99454	-0.41784	0.92203	-0.22424	0.86007	0.79356	0.34201	0.68333	0.42874	-0.13733	0.99997	-0.64301	0.56722	1.193	0.024183	0.2665	0.77936	0.48225	0.71392	0.54913	0.47819
contig09487	HAT1_HUMANRecName: Full=Histone acetyltransferase type B catalytic subunit; AltName: Full=Histone acetyltransferase 1	1.0189	0.49336	-0.066978	0.9977	-0.37864	0.96491	-0.34239	0.85464	0.2286	0.92333	0.3459	0.88681	0.037696	0.99997	0.099238	0.98847	3.898	0.002894	1.1431	0.35402	0.077449	0.98391	1.068	0.39462
contig09490	PPWD1_BOVINRecName: Full=Peptidylprolyl isomerase domain and WD repeat-containing protein 1	-0.048112	0.99282	-1.3509	0.9585	-0.6649	0.95763	-0.58109	0.88907	-0.1019	0.98212	0.40958	0.87879	-0.27879	0.99997	-0.86325	0.86834	3.1289	0.027374	0.33268	0.9063	-0.33321	0.93948	-0.98414	0.55898
contig09492	CES2_CAEELRecName: Full=Cell death specification protein 2	0.38036	0.4303	-0.11794	0.9938	-0.13719	0.95472	0.1938	0.71707	0.33598	0.45237	0.015752	0.98156	0.25819	0.99997	-0.069233	0.95746	0.94486	0.0013291	0.57137	0.085791	0.41009	0.45392	0.5422	0.12925
contig09498	RER1_CHICKRecName: Full=Protein RER1	0.26995	0.59716	0.18441	0.97048	0.31212	0.78227	0.63567	0.053871	0.44812	0.23877	-0.31291	0.44521	0.30012	0.99997	0.40684	0.39796	0.62926	0.013266	0.7037	0.024252	0.37689	0.46705	0.70519	0.034717
contig09499	---NA---	-0.23123	0.89421	-0.93473	0.67291	0.54468	0.92193	0.93532	0.39651	-1.0632	0.27902	-0.52833	0.57842	-0.20865	0.99997	0.75721	0.71565	1.9732	0.023623	1.5412	0.079923	0.29353	0.88908	0.30139	0.78037
contig09500	---NA---	0.58149	0.73123	0.56561	0.98586	-3.4309	0.022566	-2.7923	0.028916	1.4889	0.24147	0.13651	0.95477	-0.61299	0.99997	-0.77186	0.79823	0.8416	0.42671	2.0166	0.15951	-1.6866	0.35546	-0.30183	0.85228
contig09505	CSK_RATRecName: Full=Tyrosine-protein kinase CSK; AltName: Full=C-Src kinase	0.28043	0.62559	0.046404	0.99454	0.033084	0.99458	0.28687	0.55342	0.35438	0.43416	-0.25969	0.57773	0.13415	0.99997	0.32167	0.5905	0.53843	0.04804	0.3934	0.29146	0.20149	0.78228	0.55118	0.13418
contig09510	---NA---	0.37209	0.67432	-0.076689	0.99454	-0.07656	0.98919	-0.10421	0.92092	-0.052444	0.96861	0.15199	0.85603	0.044104	0.99997	-0.060109	0.98119	0.9743	0.015981	0.16313	0.83065	0.050071	0.97199	0.031495	0.97164
contig09513	BRK1B_XENLARecName: Full=Probable protein BRICK1-B	0.0098684	0.99337	-0.20728	0.97602	0.24247	0.91044	0.69298	0.076883	0.31905	0.53803	-0.10778	0.86167	0.050963	0.99997	-0.15743	0.87327	0.56991	0.049806	0.2379	0.6121	-0.1044	0.91537	0.23571	0.60501
contig09516	LC7L2_HUMANRecName: Full=Putative RNA-binding protein Luc7-like 2	0.087198	0.93939	-0.20145	0.98162	-0.067967	0.98709	-0.22503	0.72937	0.30985	0.60341	0.21378	0.7165	-0.047865	0.99997	-0.066475	0.96893	0.64676	0.042054	0.096693	0.8817	0.17856	0.84591	0.78167	0.067277
contig09517	---NA---	-0.33432	0.56199	-0.96341	0.027561	-0.80558	0.095698	-0.19156	0.75182	-0.26678	0.63124	-0.15738	0.78019	-0.51003	0.78431	-0.82543	0.059915	0.76897	0.009626	0.31577	0.46067	0.059377	0.95704	0.14783	0.76763
contig09521	AT2B3_HUMANRecName: Full=Plasma membrane calcium-transporting ATPase 3; Short=PMCA3; AltName: Full=Plasma membrane calcium ATPase isoform 3; AltName: Full=Plasma membrane calcium pump isoform 3	0.62372	0.58618	0.07832	0.99556	-0.45124	0.92193	0.12373	0.94184	-0.46522	0.68222	0.011324	0.99238	-0.039552	0.99997	0.85878	0.44011	1.2558	0.046714	0.59708	0.47979	0.57208	0.67182	0.61661	0.45356
contig09529	---NA---	1.0348	0.62941	-0.2047	0.99454	0.1411	0.99437	1.3354	0.48915	0.93851	0.62867	-0.17938	0.94055	0.16707	0.99997	-0.11594	0.98715	2.9814	0.0051176	2.1043	0.098287	1.1723	0.60739	1.6297	0.24335
contig09531	S35B4_HUMANRecName: Full=UDP-xylose and UDP-N-acetylglucosamine transporter; AltName: Full=Solute carrier family 35 member B4; AltName: Full=YEA4 homolog	0.6667	0.13647	0.34952	0.87213	0.45518	0.6284	0.49672	0.24387	0.69983	0.11299	0.14425	0.80233	0.11235	0.99997	0.16287	0.86593	0.98154	0.0019044	0.4855	0.19914	0.023715	0.98378	0.32608	0.43785
contig09533	1433E_DROMERecName: Full=14-3-3 protein epsilon; AltName: Full=Suppressor of Ras1 3-9	0.66593	0.37821	-0.04404	0.99719	-0.1514	0.97212	0.093953	0.93626	0.32791	0.71659	-0.57237	0.41931	-0.038146	0.99997	0.59696	0.49907	0.86606	0.045088	0.70267	0.21775	0.142	0.92362	0.95147	0.10048
contig09541	RED_HUMANRecName: Full=Protein Red; AltName: Full=Cytokine IK; AltName: Full=IK factor; AltName: Full=Protein RER	-1.272	0.40135	-1.4089	0.7188	1.5693	0.4975	1.5848	0.24011	-1.1645	0.43772	0.42581	0.79632	-0.96809	0.99997	-0.70278	0.76661	2.7801	0.0063061	0.70837	0.52638	-0.15134	0.96396	-0.79991	0.40426
contig09542	VATO_MOUSERecName: Full=V-type proton ATPase 21 kDa proteolipid subunit; Short=V-ATPase 21 kDa proteolipid subunit; AltName: Full=23 kDa subunit of V-ATPase; AltName: Full=Vacuolar proton pump 21 kDa proteolipid subunit	0.74676	0.19613	0.43242	0.87366	0.55084	0.66121	1.1123	0.017359	0.50626	0.38767	-0.18034	0.80251	0.21982	0.99997	0.26318	0.79565	1.0597	0.0052389	0.81746	0.070945	0.1296	0.91564	0.39284	0.45783
contig09546	---NA---	0.50849	0.82193	-0.47103	0.98482	0.16648	0.99043	0.092028	0.97208	0.0055137	0.99905	0.28891	0.87009	-0.38292	0.99997	-0.37237	0.91653	1.8029	0.049963	0.20529	0.90549	0.22435	0.94632	0.16544	0.93081
contig09548	NDUS2_RATRecName: Full=NADH dehydrogenase	0.92239	0.11003	0.41288	0.90713	0.67464	0.51558	1.0517	0.032448	0.96341	0.092218	0.19784	0.79019	0.10885	0.99997	0.68491	0.34103	1.5061	0.00054036	1.0804	0.023234	0.038235	0.97917	0.77294	0.12968
contig09554	DERL1_HUMANRecName: Full=Derlin-1; AltName: Full=Degradation in endoplasmic reticulum protein 1; Short=DERtrin-1; AltName: Full=Der1-like protein 1	0.38583	0.68151	-0.38269	0.94583	-0.017287	0.99794	0.31346	0.70771	0.068253	0.96099	-0.35135	0.63422	-0.05184	0.99997	0.23757	0.86502	1.1897	0.006434	0.75689	0.15877	0.5405	0.54852	1.1361	0.043481
contig09555	QCR1_BOVINRecName: Full=Cytochrome b-c1 complex subunit 1, mitochondrial; AltName: Full=Complex III subunit 1; AltName: Full=Core protein I; AltName: Full=Ubiquinol-cytochrome-c reductase complex core protein 1; Flags: Precursor	0.99336	0.3473	0.18946	0.9938	0.53041	0.90418	0.80353	0.42718	0.67185	0.54083	-0.070217	0.96238	-0.20005	0.99997	0.65049	0.64631	1.3916	0.025014	1.1088	0.15997	-0.081328	0.97077	0.6943	0.43754
contig09557	RL15_RATRecName: Full=60S ribosomal protein L15	0.13888	0.89509	-0.11521	0.9938	0.3288	0.87792	1.0264	0.017737	0.47059	0.38507	-0.34647	0.5414	0.094681	0.99997	0.23432	0.80935	0.71105	0.03463	0.9308	0.026461	0.93291	0.12314	1.1167	0.014006
contig09559	ST1C2_HUMANRecName: Full=Sulfotransferase 1C2; Short=ST1C2; AltName: Full=Sulfotransferase 1C1; Short=SULT1C#1; AltName: Full=humSULTC2	2.5089	0.030729	0.85576	0.89196	-0.15009	0.99344	0.26532	0.92584	1.5995	0.17232	2.1254	0.077573	1.2646	0.93789	1.3043	0.49016	2.3768	0.039568	1.5354	0.33449	1.2003	0.4993	2.162	0.063204
contig09567	---NA---	0.45763	0.34384	0.32794	0.88295	0.48181	0.54436	0.76383	0.03809	0.88656	0.032067	0.37941	0.4127	0.25961	0.99997	0.046745	0.97854	0.93124	0.0023327	0.78172	0.026714	0.34796	0.57535	0.72026	0.058496
contig09568	---NA---	0.66138	0.25695	-0.16918	0.99367	-0.021386	0.99686	-0.15384	0.85788	0.62823	0.24676	-0.64495	0.26591	-0.049368	0.99997	1.1725	0.019095	0.82828	0.021161	0.73925	0.096885	0.31394	0.72779	0.83456	0.079368
contig09572	MD1L1_HUMANRecName: Full=Mitotic spindle assembly checkpoint protein MAD1; AltName: Full=Mitotic arrest deficient 1-like protein 1; Short=MAD1-like protein 1; AltName: Full=Mitotic checkpoint MAD1 protein homolog; Short=HsMAD1; Short=hMAD1; AltName: Full=Tax-binding protein 181	0.34963	0.84051	0.34373	0.98744	-0.057625	0.99544	0.33503	0.8111	0.53742	0.66021	-0.43005	0.73898	0.23866	0.99997	-0.34926	0.86555	1.4296	0.039799	0.71645	0.42597	0.90812	0.48061	0.76949	0.38563
contig09592	---NA---	0.45332	0.86827	0.05746	0.99792	-0.40978	0.97455	0.11936	0.96284	0.16966	0.96728	0.50326	0.80339	0.65689	0.99997	-1.2527	0.67339	5.221	0.0023818	0.40313	0.86307	-0.64235	0.82031	-0.32232	0.85227
contig09597	IDH3A_DROMERecName: Full=Probable isocitrate dehydrogenase	0.58906	0.73518	0.21784	0.9938	-0.24946	0.97774	-0.014972	0.99456	0.21413	0.92426	0.092644	0.95865	0.32615	0.99997	1.1377	0.42837	1.6543	0.025282	1.3079	0.16527	0.50602	0.8003	1.0302	0.31735
contig09599	FKBP4_MOUSERecName: Full=Peptidyl-prolyl cis-trans isomerase FKBP4; Short=PPIase FKBP4; AltName: Full=52 kDa FK506-binding protein; Short=52 kDa FKBP; Short=FKBP-52; AltName: Full=59 kDa immunophilin; Short=p59; AltName: Full=FK506-binding protein 4; Short=FKBP-4; AltName: Full=FKBP59; AltName: Full=HSP-binding immunophilin; Short=HBI; AltName: Full=Immunophilin FKBP52; AltName: Full=Rotamase; Co…	-0.026268	0.98214	-0.31738	0.89197	0.065744	0.98525	0.071343	0.92394	0.31174	0.5317	-0.43145	0.34661	-0.061028	0.99997	0.13397	0.89524	0.56897	0.043262	0.36064	0.36497	0.20576	0.78503	0.51848	0.17754
contig09606	MDHM_PONABRecName: Full=Malate dehydrogenase, mitochondrial; Flags: Precursor	0.30008	0.81826	0.049682	0.99719	0.36608	0.92539	0.76688	0.28639	-0.23335	0.85134	-0.47983	0.55326	0.56859	0.99997	1.4473	0.037268	0.48028	0.30608	0.53744	0.4441	0.36747	0.76814	0.79074	0.22835
contig09608	STIP1_RATRecName: Full=Stress-induced-phosphoprotein 1; Short=STI1; AltName: Full=Hsc70/Hsp90-organizing protein; Short=Hop	1.0923	0.22268	0.1769	0.9938	0.40038	0.9458	-0.49093	0.67552	0.18449	0.90772	0.11235	0.95145	0.64203	0.99997	0.92545	0.61294	2.1481	0.012401	2.2114	0.034827	1.0991	0.41484	0.93884	0.27004
contig09613	---NA---	0.67364	0.29222	0.025709	0.99792	-0.16828	0.96454	-0.51457	0.41053	0.50185	0.43103	0.28514	0.68213	-0.20828	0.99997	-0.15741	0.9155	0.86665	0.025375	0.13204	0.86372	-0.30867	0.75725	0.17748	0.79429
contig09615	AHSA1_HUMANRecName: Full=Activator of 90 kDa heat shock protein ATPase homolog 1; Short=AHA1; AltName: Full=p38	-0.27253	0.85063	0.51767	0.92601	1.4356	0.40231	2.1564	0.02233	0.069624	0.97101	0.85387	0.29995	0.41521	0.99997	-0.10913	0.97201	1.3365	0.021063	0.21075	0.82696	-0.35447	0.84055	-0.02294	0.98656
contig09623	DHX15_HUMANRecName: Full=Pre-mRNA-splicing factor ATP-dependent RNA helicase DHX15; AltName: Full=ATP-dependent RNA helicase #46; AltName: Full=DEAH box protein 15	0.4218	0.32163	0.081698	0.9938	0.14072	0.94809	0.31167	0.45947	0.64497	0.089071	-0.21004	0.6361	0.13922	0.99997	0.22105	0.72803	0.92839	0.0010166	0.60495	0.053176	0.38671	0.45574	0.71903	0.033057
contig09625	MAX_CHICKRecName: Full=Protein max; AltName: Full=Myc-associated factor X	1.0746	0.05573	0.74847	0.47655	0.39616	0.84835	0.69347	0.20094	0.80609	0.1582	0.091388	0.9152	0.30505	0.99997	0.49358	0.52934	1.2317	0.0023825	0.61032	0.21672	0.34667	0.71191	0.44471	0.40931
contig09628	PIM2_DANRERecName: Full=Serine/threonine-protein kinase pim-2; AltName: Full=Kinase pim-1	0.72352	0.099888	0.81744	0.092713	0.85999	0.062522	1.0113	0.0058091	1.0116	0.01443	0.5619	0.2305	0.037051	0.99997	0.089586	0.94385	0.9806	0.0018887	0.88787	0.014971	0.56019	0.32148	0.7162	0.064679
contig09632	VPP4_HUMANRecName: Full=V-type proton ATPase 116 kDa subunit a isoform 4; Short=V-ATPase 116 kDa isoform a4; AltName: Full=Vacuolar proton translocating ATPase 116 kDa subunit a isoform 4; AltName: Full=Vacuolar proton translocating ATPase 116 kDa subunit a kidney isoform	-0.035515	0.98876	-0.6103	0.90601	0.38268	0.93429	0.19702	0.89002	-0.79059	0.38061	-0.41903	0.67908	-0.67865	0.99997	0.11191	0.97049	1.2194	0.030022	0.44917	0.62139	-0.16644	0.9328	0.54934	0.51204
contig09639	---NA---	0.89988	0.11003	0.5802	0.70947	0.55871	0.66559	0.7653	0.13796	0.54127	0.36019	0.23367	0.73399	0.21786	0.99997	1.0662	0.055855	1.143	0.0075424	1.0045	0.029395	0.57228	0.45094	0.79453	0.10937
contig09640	PIRL_SOLLCRecName: Full=Pirin-like protein	1.2164	0.1067	0.29435	0.98392	0.50738	0.86421	0.51148	0.56259	0.60416	0.47338	0.41661	0.63342	0.45049	0.99997	1.1928	0.1485	1.4227	0.0060062	1.2639	0.04093	1.1408	0.22483	1.8719	0.005271
contig09641	GELS1_LUMTERecName: Full=Gelsolin-like protein 1; AltName: Full=Actin-modulator; Short=EWAM; Short=EWAM-P1	0.33607	0.8725	0.23451	0.9938	0.015837	0.99857	0.38627	0.85118	-0.1968	0.93765	1.0304	0.37063	-0.5078	0.99997	-0.49712	0.89684	2.2003	0.0085587	0.99301	0.30808	-0.46637	0.90671	-0.38356	0.83279
contig09644	---NA---	0.71256	0.3498	0.73623	0.67064	0.4023	0.89373	0.66839	0.3274	1.1612	0.082599	0.65716	0.36144	0.13157	0.99997	-0.37652	0.74119	1.1835	0.0094064	0.78985	0.16622	0.54054	0.58132	0.50171	0.43607
contig09646	AL9A1_MOUSERecName: Full=4-trimethylaminobutyraldehyde dehydrogenase; Short=TMABA-DH; Short=TMABADH; AltName: Full=Aldehyde dehydrogenase family 9 member A1	0.29583	0.63146	-0.095576	0.9938	0.19892	0.93429	0.09981	0.89172	0.43089	0.35417	-0.51556	0.27597	0.12512	0.99997	0.48704	0.38268	0.85337	0.0051275	0.60528	0.096945	0.016179	0.98989	0.6174	0.11486
contig09647	---NA---	-0.050812	0.9774	-0.57366	0.83461	-0.69365	0.62905	-0.13748	0.90383	0.17028	0.89135	0.027008	0.9808	-0.3091	0.99997	-0.77737	0.35425	1.076	0.016497	0.30741	0.67956	-0.60819	0.51103	-0.098808	0.91185
contig09652	FKBP8_HUMANRecName: Full=Peptidyl-prolyl cis-trans isomerase FKBP8; Short=PPIase FKBP8; AltName: Full=38 kDa FK506-binding protein; Short=38 kDa FKBP; Short=FKBP-38; Short=hFKBP38; AltName: Full=FK506-binding protein 8; Short=FKBP-8; AltName: Full=FKBPR38; AltName: Full=Rotamase	0.52704	0.67362	0.16918	0.9938	0.32934	0.94661	0.3303	0.78796	0.075219	0.96803	0.94248	0.30117	0.12732	0.99997	-0.044113	0.99221	1.3629	0.017218	0.57926	0.49365	-0.24165	0.90629	0.33499	0.75534
contig09655	PCS3_LOTJARecName: Full=Glutathione gamma-glutamylcysteinyltransferase 3; AltName: Full=LjPCS3-7N; AltName: Full=Phytochelatin synthase 3	0.12488	0.88235	0.11272	0.9938	0.41889	0.66382	0.86475	0.014622	0.54949	0.1893	0.18308	0.71958	0.036052	0.99997	-0.070932	0.95825	0.72179	0.010658	0.34174	0.38592	-0.010631	0.99195	0.023326	0.96937
contig09659	---NA---	0.95114	0.46791	-0.23354	0.9938	0.76143	0.8441	1.0892	0.31019	0.36965	0.8349	0.77041	0.51323	-0.79241	0.99997	-0.63591	0.71762	1.5803	0.025967	0.49361	0.6769	0.23157	0.92356	0.81519	0.42297
contig09661	SYFAB_XENLARecName: Full=Phenylalanine--tRNA ligase alpha subunit B; AltName: Full=Phenylalanyl-tRNA synthetase alpha subunit B; Short=PheRS	0.42931	0.56718	0.084583	0.99454	0.26181	0.93429	0.73846	0.16373	0.50051	0.41633	0.20048	0.7849	-0.020655	0.99997	-0.011065	0.99684	0.93079	0.014921	0.74347	0.11544	0.46232	0.57632	0.41908	0.4425
contig09670	Z658B_HUMANRecName: Full=Zinc finger protein 658B	-0.74442	0.66441	-1.2133	0.7874	-1.9977	0.27412	-1.1058	0.37475	-0.74037	0.74386	0.11135	0.95638	-0.89148	0.99997	-0.29099	0.94739	2.5854	0.013237	0.28919	0.82724	0.04771	0.98879	-0.7137	0.49096
contig09673	PRC2C_MOUSERecName: Full=Protein PRRC2C; AltName: Full=BAT2 domain-containing protein 1; AltName: Full=HLA-B-associated transcript 2-like 2; AltName: Full=Proline-rich and coiled-coil-containing protein 2C	-0.0040982	0.99887	0.020218	0.99792	-0.99727	0.30719	-0.84506	0.19644	-0.53541	0.49152	-0.22809	0.80025	-0.49283	0.99997	0.32077	0.80431	0.9087	0.044727	-0.13666	0.88253	-0.12637	0.93812	0.16635	0.84248
contig09684	PANK1_ORYSJRecName: Full=Pantothenate kinase 1; AltName: Full=Pantothenic acid kinase 1	0.029768	0.9865	-1.1233	0.10709	0.13988	0.97234	-0.19072	0.84004	-0.56054	0.38962	-0.60215	0.41439	-0.29078	0.99997	-0.97624	0.22299	0.44904	0.30792	1.2216	0.01704	-0.26509	0.83382	-0.13793	0.87354
contig09689	---NA---	0.82802	0.27497	0.37256	0.95867	0.58259	0.77494	1.1028	0.073799	0.57137	0.46207	0.7059	0.34547	-0.5996	0.9994	-0.36236	0.76772	1.1404	0.014834	1.0194	0.076177	0.6991	0.4632	0.88842	0.15498
contig09692	MAIP1_HUMANRecName: Full=m-AAA protease-interacting protein 1, mitochondrial; AltName: Full=Matrix AAA peptidase-interacting protein 1; Flags: Precursor	0.19739	0.91125	0.13441	0.99454	0.85617	0.6284	0.80897	0.33733	0.46667	0.66508	0.71207	0.42552	-0.55844	0.99997	-0.4527	0.78693	1.3856	0.024368	0.5208	0.53305	-0.41267	0.80421	-0.081006	0.94958
contig09698	---NA---	0.59398	0.27407	0.32212	0.93599	0.35046	0.8455	0.3318	0.57274	0.5771	0.25094	-0.36493	0.50567	0.54631	0.84171	1.1077	0.015976	0.72446	0.028451	0.47436	0.29105	0.51013	0.45065	0.82882	0.060881
contig09706	JMJD4_DANRERecName: Full=2-oxoglutarate and iron-dependent oxygenase JMJD4; AltName: Full=JmjC domain-containing protein 4; AltName: Full=Jumonji domain-containing protein 4; AltName: Full=Lysyl-hydroxylase JMJD4	-0.1044	0.95479	-0.25953	0.98866	0.059905	0.99437	0.25081	0.82309	0.27742	0.81279	0.30222	0.73676	-0.084926	0.99997	-0.25251	0.87843	1.0856	0.025535	-0.29119	0.73075	-0.67041	0.50803	-0.038163	0.97165
contig09708	PEX5_MOUSERecName: Full=Peroxisomal targeting signal 1 receptor; Short=PTS1 receptor; Short=PTS1R; AltName: Full=PTS1-BP; AltName: Full=PXR1P; AltName: Full=Peroxin-5; AltName: Full=Peroxisomal C-terminal targeting signal import receptor; AltName: Full=Peroxisome receptor 1	0.53646	0.48687	-0.21875	0.98874	0.59261	0.69254	0.69368	0.25233	0.39926	0.6022	0.045904	0.96291	-0.09306	0.99997	0.035729	0.99001	1.608	0.0006078	1.0296	0.043699	0.58582	0.49097	1.0525	0.05662
contig09711	SGK1_RATRecName: Full=Serine/threonine-protein kinase Sgk1; AltName: Full=Serum/glucocorticoid-regulated kinase 1	-0.48175	0.81756	-0.34615	0.99367	-0.032571	0.99794	0.29436	0.87716	-0.70577	0.63189	-0.078709	0.96705	0.24386	0.99997	0.41822	0.87155	2.2385	0.010871	0.10216	0.95374	0.32555	0.89256	0.53691	0.66425
contig09714	CATB_MACFARecName: Full=Cathepsin B; Contains: RecName: Full=Cathepsin B light chain; Contains: RecName: Full=Cathepsin B heavy chain; Flags: Precursor	0.32895	0.88921	-0.84755	0.89732	0.23835	0.97647	0.50091	0.75426	0.53258	0.74906	-0.49608	0.72566	-0.16017	0.99997	0.71903	0.69937	1.7079	0.025933	1.3316	0.17558	0.82505	0.6415	1.9348	0.058967
contig09715	TSSK1_MOUSERecName: Full=Testis-specific serine/threonine-protein kinase 1; Short=TSK-1; Short=TSK1; Short=TSSK-1; Short=Testis-specific kinase 1; AltName: Full=Serine/threonine-protein kinase 22A	0.87386	0.51984	-0.11266	0.99516	-0.58651	0.90936	-0.63622	0.62583	0.11858	0.96009	0.49569	0.69762	-0.51448	0.99997	-0.45854	0.82735	1.483	0.035166	0.011467	0.99502	-0.66557	0.70075	0.15126	0.91563
contig09723	CATL_SARPERecName: Full=Cathepsin L; Contains: RecName: Full=Cathepsin L heavy chain; Contains: RecName: Full=Cathepsin L light chain; Flags: Precursor	1.2337	0.14199	-0.46386	0.9585	-0.064593	0.99499	-0.26749	0.83395	0.10756	0.95293	-0.2161	0.84957	0.12788	0.99997	0.37446	0.81233	1.4491	0.0093722	1.119	0.10022	-0.38489	0.7941	0.86199	0.24997
contig09728	DHB4_HUMANRecName: Full=Peroxisomal multifunctional enzyme type 2; Short=MFE-2; AltName: Full=17-beta-hydroxysteroid dehydrogenase 4; Short=17-beta-HSD 4; AltName: Full=D-bifunctional protein; Short=DBP; AltName: Full=Multifunctional protein 2; Short=MPF-2; AltName: Full=Short chain dehydrogenase/reductase family 8C member 1; Contains: RecName: Full=(3R)-hydroxyacyl-CoA dehydrogenase; Contains: R…	0.59651	0.80771	0.46386	0.99034	-0.8847	0.87913	-0.48125	0.81914	0.57351	0.78541	0.060886	0.97886	0.11313	0.99997	1.3818	0.44417	1.9318	0.035138	0.22147	0.90895	0.4133	0.88392	1.0234	0.44132
contig09729	---NA---	0.71144	0.54323	-0.055352	0.99719	-0.38004	0.96275	0.3546	0.8624	1.0275	0.26701	0.31655	0.78522	-0.094871	0.99997	-0.10792	0.98137	1.7449	0.011689	1.1167	0.14422	0.0036876	0.99868	1.1505	0.20834
contig09732	CPVL_PONABRecName: Full=Probable serine carboxypeptidase CPVL; Flags: Precursor	-0.2595	0.88587	-0.86777	0.7515	-0.11808	0.98888	0.41493	0.72969	0.044541	0.98223	-0.18796	0.88498	-0.25036	0.99997	-0.13223	0.96562	1.3971	0.018931	0.56659	0.53005	-0.11275	0.95988	0.71306	0.39626
contig09735	KDSR_HUMANRecName: Full=3-ketodihydrosphingosine reductase; Short=KDS reductase; AltName: Full=3-dehydrosphinganine reductase; AltName: Full=Follicular variant translocation protein 1; Short=FVT-1; AltName: Full=Short chain dehydrogenase/reductase family 35C member 1; Flags: Precursor	0.74885	0.12924	0.019201	0.99792	0.28643	0.8974	0.3717	0.49999	0.53185	0.28675	0.0094619	0.98981	-0.023003	0.99997	0.074521	0.96352	0.93995	0.0051621	0.52016	0.21803	0.3275	0.66701	0.48674	0.2759
contig09744	DRG2_HUMANRecName: Full=Developmentally-regulated GTP-binding protein 2; Short=DRG-2; AltName: Full=Translation factor GTPase DRG2; Short=TRAFAC GTPase DRG2	0.45249	0.46404	-0.064921	0.99454	-0.16545	0.95763	-0.067	0.94074	0.35849	0.54749	0.1776	0.78495	-0.18702	0.99997	-0.17084	0.88222	0.9192	0.0076411	0.67436	0.10666	0.43868	0.53547	0.7167	0.10906
contig09749	---NA---	0.77159	0.040639	0.76666	0.056898	0.18284	0.93429	0.77448	0.017097	0.89523	0.011798	0.29343	0.4807	0.48702	0.64171	0.66803	0.09397	0.98064	0.00064298	0.83474	0.0093552	0.70922	0.11417	0.82759	0.014925
contig09750	WDR61_DANRERecName: Full=WD repeat-containing protein 61	0.2055	0.8939	-0.99219	0.45921	-0.020323	0.99794	0.045795	0.97431	-0.17579	0.90068	0.060845	0.95934	-0.50966	0.99997	-0.42517	0.73153	1.1807	0.017557	0.76178	0.24409	-0.014345	0.99369	0.54436	0.44435
contig09753	RABL3_CHICKRecName: Full=Rab-like protein 3	0.31912	0.58453	-0.097976	0.9938	0.14716	0.95528	0.096718	0.89465	0.53332	0.22306	-0.082176	0.89822	0.096917	0.99997	0.088991	0.94385	0.73412	0.012301	0.57232	0.11256	0.52484	0.35762	0.86466	0.025582
contig09757	---NA---	0.77924	0.051605	0.46577	0.62927	0.34441	0.76767	0.55151	0.1408	0.7088	0.078683	-0.064505	0.91624	0.34179	0.99997	0.44129	0.39162	0.76296	0.0062687	0.87586	0.010175	0.57959	0.2578	0.7812	0.030141
contig09764	ANKH1_HUMANRecName: Full=Ankyrin repeat and KH domain-containing protein 1; AltName: Full=HIV-1 Vpr-binding ankyrin repeat protein; AltName: Full=Multiple ankyrin repeats single KH domain; Short=hMASK	1.1377	0.27407	0.46795	0.97048	-0.032397	0.99793	0.20606	0.89786	0.53489	0.67046	-0.060793	0.96922	-0.52386	0.99997	-0.89097	0.48483	1.4433	0.023304	1.3712	0.081987	0.018361	0.99369	-0.041416	0.9777
contig09766	---NA---	0.25336	0.64544	-0.075102	0.9938	0.45991	0.50192	0.62594	0.066359	0.14264	0.82057	-0.41169	0.31849	0.065288	0.99997	0.20385	0.76373	0.52012	0.041779	0.28355	0.4515	-0.014186	0.98989	0.22155	0.57206
contig09767	---NA---	0.22771	0.81011	-0.27953	0.95977	-0.5822	0.57557	0.070955	0.94074	-0.86459	0.10775	-0.4977	0.38564	-0.28089	0.99997	0.27889	0.76661	0.69555	0.048132	0.36232	0.4958	0.093067	0.94145	0.18749	0.75671
contig09772	LRC57_XENLARecName: Full=Leucine-rich repeat-containing protein 57	0.39702	0.4323	-0.24465	0.95147	0.29136	0.85248	0.59555	0.12243	0.37648	0.40673	-0.2599	0.58636	0.038221	0.99997	0.1883	0.81764	0.6822	0.015978	0.6947	0.045588	0.35131	0.56238	0.63667	0.08758
contig09779	NDOR1_XENLARecName: Full=NADPH-dependent diflavin oxidoreductase 1; AltName: Full=NADPH-dependent FMN and FAD-containing oxidoreductase	0.060708	0.95625	-0.028611	0.99719	0.064502	0.98652	0.043129	0.95725	0.55293	0.21111	-0.025307	0.97217	0.049059	0.99997	-0.081945	0.95133	0.57712	0.047004	0.18508	0.71331	-0.012984	0.99122	0.1649	0.73865
contig09789	---NA---	0.98091	0.38535	0.8425	0.8319	-1.5429	0.22011	0.074389	0.96763	0.15936	0.93835	1.0342	0.37697	1.2707	0.9972	0.16558	0.96372	1.4716	0.041868	1.2011	0.20356	0.39023	0.85282	1.0108	0.31779
contig09795	SYT15_HUMANRecName: Full=Synaptotagmin-15; AltName: Full=Chr10Syt; AltName: Full=Synaptotagmin XV; Short=SytXV	0.31186	0.6754	-0.01016	0.99861	-0.1224	0.96995	0.15457	0.84557	0.26705	0.69434	-0.61477	0.25879	0.1073	0.99997	0.75038	0.19313	0.4228	0.19695	0.61564	0.14829	0.56582	0.39741	0.92744	0.038198
contig09802	RBM22_XENLARecName: Full=Pre-mRNA-splicing factor RBM22; AltName: Full=RNA-binding motif protein 22	0.78054	0.54263	-0.32838	0.9938	-0.52589	0.92148	-0.53676	0.67006	-0.047601	0.98346	0.37893	0.76105	0.10835	0.99997	-0.95637	0.46391	1.3772	0.035784	0.38451	0.73858	-0.41619	0.819	0.047931	0.97463
contig09812	AOFB_PONABRecName: Full=Amine oxidase	1.5464	0.11658	1.062	0.6752	1.0324	0.60549	1.3612	0.12884	0.59873	0.6278	-0.82314	0.43686	1.3326	0.71975	2.8314	0.0033502	1.4865	0.022694	1.1831	0.15154	1.5369	0.26836	2.2558	0.021001
contig09814	S352B_HUMANRecName: Full=Solute carrier family 35 member E2B	0.15674	0.94848	0.068256	0.99719	-0.32354	0.96275	-0.29097	0.86977	0.36445	0.81857	0.06044	0.9699	-0.49882	0.99997	-1.0324	0.53728	1.4405	0.048397	-0.012773	0.99479	-0.47547	0.81168	0.15503	0.91599
contig09815	EDRF1_MOUSERecName: Full=Erythroid differentiation-related factor 1	0.28393	0.80314	-0.14851	0.9938	0.23354	0.94921	0.54996	0.43361	0.69186	0.30044	0.57073	0.41439	-0.27106	0.99997	-0.66153	0.42837	1.119	0.010391	0.48793	0.43243	0.30827	0.78826	0.41621	0.51467
contig09817	NUP58_RATRecName: Full=Nucleoporin p58/p45; AltName: Full=58 kDa nucleoporin; AltName: Full=Nucleoporin-like protein 1	0.59335	0.53998	-0.57149	0.88295	-0.51589	0.88939	0.19691	0.88739	-0.11633	0.94208	-0.22207	0.82569	0.1399	0.99997	0.21517	0.94826	0.72114	0.22431	1.4571	0.036006	0.7462	0.52104	0.89757	0.23917
contig09818	---NA---	0.27907	0.65762	-0.13229	0.99367	0.12479	0.96491	0.21551	0.70757	0.47857	0.28603	-0.16634	0.76251	-0.063287	0.99997	0.11514	0.91893	0.78452	0.0083406	0.56601	0.11861	0.20477	0.79327	0.60029	0.12201
contig09819	ZSC22_HUMANRecName: Full=Zinc finger and SCAN domain-containing protein 22; AltName: Full=Krueppel-related zinc finger protein 2; AltName: Full=Protein HKR2; AltName: Full=Zinc finger protein 50	0.50729	0.52574	0.064707	0.99519	0.41347	0.87293	0.57584	0.37925	0.99425	0.11299	0.68856	0.3016	-0.16248	0.99997	-0.67023	0.40001	1.1805	0.0060184	0.51859	0.3749	0.17118	0.89583	0.22655	0.74636
contig09820	---NA---	0.83552	0.67861	1.24	0.80447	-0.12531	0.99428	0.27688	0.9156	0.12063	0.97136	1.0553	0.53425	-0.65813	0.99997	0.77035	0.86194	2.2253	0.031026	0.63046	0.67589	0.19258	0.96901	0.36668	0.84291
contig09822	CHM4C_DANRERecName: Full=Charged multivesicular body protein 4c; AltName: Full=Chromatin-modifying protein 4c; Short=CHMP4c	-0.079793	0.97311	-0.32501	0.98482	-0.77995	0.7162	-0.35444	0.76624	-0.61268	0.53819	0.4838	0.61928	0.085279	0.99997	0.13993	0.95968	1.1216	0.044925	0.19636	0.85984	-0.72433	0.5461	0.1417	0.89772
contig09826	ECHA_HUMANRecName: Full=Trifunctional enzyme subunit alpha, mitochondrial; AltName: Full=78 kDa gastrin-binding protein; AltName: Full=Monolysocardiolipin acyltransferase; AltName: Full=TP-alpha; Includes: RecName: Full=Long-chain enoyl-CoA hydratase; Includes: RecName: Full=Long chain 3-hydroxyacyl-CoA dehydrogenase; Flags: Precursor	0.67812	0.51746	0.45145	0.9585	0.36579	0.93493	0.32371	0.78415	-0.59451	0.53779	-0.26117	0.81106	0.4554	0.99997	1.4554	0.087866	1.0618	0.049729	1.4223	0.034827	0.59048	0.63931	0.79715	0.2915
contig09827	---NA---	0.21884	0.76531	-0.32653	0.89808	-0.18607	0.9413	0.027287	0.97464	0.33166	0.51962	-0.5029	0.29266	-0.0098064	0.99997	0.23985	0.75418	0.78839	0.0091768	0.38685	0.34788	0.23239	0.76045	0.56044	0.16077
contig09834	VPS45_HUMANRecName: Full=Vacuolar protein sorting-associated protein 45; Short=h-VPS45; Short=hlVps45	0.10549	0.95959	-0.47861	0.94757	-0.37851	0.93429	-0.39457	0.70834	-0.041209	0.98157	0.71572	0.40858	-0.0076077	0.99997	-0.59787	0.61499	1.0879	0.039809	0.16757	0.87546	0.16623	0.9271	0.18711	0.84904
contig09838	NUBP2_NEMVERecName: Full=Cytosolic Fe-S cluster assembly factor NUBP2 homolog	0.27878	0.8018	-0.13385	0.9938	0.3475	0.90936	0.13857	0.89625	0.34043	0.68531	-0.60022	0.37418	-0.22945	0.99997	0.012948	0.9968	1.0268	0.015288	0.67835	0.21581	0.49555	0.59481	0.94449	0.089351
contig09842	PLIN3_HUMANRecName: Full=Perilipin-3; AltName: Full=47 kDa mannose 6-phosphate receptor-binding protein; Short=47 kDa MPR-binding protein; AltName: Full=Cargo selection protein TIP47; AltName: Full=Mannose-6-phosphate receptor-binding protein 1; AltName: Full=Placental protein 17; Short=PP17	0.63648	0.4303	-0.19717	0.9938	0.39898	0.89589	0.22143	0.83216	0.64537	0.3654	-0.30866	0.70392	-0.14584	0.99997	-0.54267	0.56897	0.9336	0.036153	0.24145	0.76074	0.68118	0.4576	1.1098	0.063015
contig09846	B3G5A_XENLARecName: Full=Lactosylceramide 1,3-N-acetyl-beta-D-glucosaminyltransferase A; AltName: Full=Lactotriaosylceramide synthase A; Short=Lc(3)Cer synthase A; Short=Lc3 synthase A; AltName: Full=UDP-GlcNAc:beta-Gal beta-1,3-N-acetylglucosaminyltransferase 5A; Short=BGnT-5A; Short=Beta-1,3-Gn-T5A; Short=Beta-1,3-N-acetylglucosaminyltransferase 5A; Short=Beta3Gn-T5A	0.36302	0.66398	0.0044345	0.99948	0.11018	0.97955	0.59946	0.29649	0.48297	0.44881	-0.16713	0.83095	0.53218	0.95877	0.13378	0.93324	1.0389	0.008066	0.81261	0.087397	0.80874	0.26836	0.62972	0.22639
contig09852	128UP_DROMERecName: Full=GTP-binding protein 128up	0.31984	0.62141	-0.20726	0.97898	0.22773	0.93176	0.72113	0.08431	0.78972	0.090009	0.13741	0.82867	-0.0088481	0.99997	-0.23507	0.78036	1.0902	0.001425	0.72005	0.061691	0.4584	0.47583	0.93326	0.025336
contig09857	CBPB_ASTASRecName: Full=Carboxypeptidase B	0.94552	0.48179	0.32092	0.99378	0.33923	0.96522	1.6637	0.13943	-0.19705	0.92999	0.42371	0.75358	-0.27597	0.99997	-0.58088	0.79554	1.8529	0.036268	0.6437	0.61939	0.042932	0.99194	-0.65822	0.59704
contig09858	---NA---	0.93906	0.38054	0.33783	0.9877	-0.17477	0.9822	0.39879	0.79024	-0.073192	0.97136	0.34276	0.77207	-0.75127	0.99997	-0.017001	0.99684	1.7479	0.012995	1.2248	0.11263	0.22337	0.92391	0.33743	0.77704
contig09864	GLTL5_MACFARecName: Full=Inactive polypeptide N-acetylgalactosaminyltransferase-like protein 5; AltName: Full=Polypeptide GalNAc transferase 15; Short=GalNAc-T15; Short=pp-GaNTase 15; AltName: Full=Protein-UDP acetylgalactosaminyltransferase 15; AltName: Full=UDP-GalNAc:polypeptide N-acetylgalactosaminyltransferase 15	1.4724	0.007165	0.9527	0.24624	0.52873	0.74121	0.87657	0.10321	0.67918	0.26213	-0.037407	0.96976	0.31642	0.99997	0.71379	0.33902	1.0915	0.0073614	1.0667	0.029481	0.28156	0.79016	0.73933	0.16724
contig09872	GGYF2_XENLARecName: Full=GRB10-interacting GYF protein 2; AltName: Full=PERQ amino acid-rich with GYF domain-containing protein 2	0.59072	0.13546	0.27012	0.91719	0.21121	0.91311	0.025724	0.97203	0.74525	0.051288	0.079343	0.88831	0.018247	0.99997	0.0068027	0.99684	0.61828	0.017231	0.40525	0.23229	0.32333	0.56093	0.66387	0.054416
contig09874	---NA---	0.30765	0.62625	-0.066758	0.99454	0.2979	0.8764	0.57053	0.18309	0.49337	0.29168	0.00099976	0.99881	-0.078607	0.99997	-0.16706	0.86778	0.98195	0.0024093	0.69089	0.064663	0.59682	0.30872	0.71743	0.074344
contig09881	---NA---	0.84516	0.080705	-0.055204	0.99454	0.18173	0.94794	-0.096012	0.90904	0.62766	0.1978	0.10272	0.88555	-0.44033	0.9799	0.022889	0.99162	1.0659	0.0022639	0.49666	0.24906	0.105	0.92391	0.51746	0.24329
contig09882	NSF1C_HUMANRecName: Full=NSFL1 cofactor p47; AltName: Full=UBX domain-containing protein 2C; AltName: Full=p97 cofactor p47	0.28189	0.90721	-0.36693	0.99305	-1.339	0.51592	-2.212	0.02324	0.033105	0.99037	-0.83767	0.50458	0.55299	0.99997	0.48145	0.834	0.86922	0.23924	0.13317	0.93603	-0.83026	0.6319	-0.70759	0.53272
contig09886	---NA---	0.36922	0.82927	0.062555	0.99719	-0.014799	0.99857	0.89618	0.35541	-0.36261	0.80592	0.64825	0.53403	0.33341	0.99997	0.35176	0.88388	1.7492	0.013527	0.81569	0.34607	0.1827	0.93331	0.75279	0.3949
contig09894	RM37_HUMANRecName: Full=39S ribosomal protein L37, mitochondrial; Short=L37mt; Short=MRP-L37; AltName: Full=39S ribosomal protein L2, mitochondrial; Short=L2mt; Short=MRP-L2; AltName: Full=Mitochondrial large ribosomal subunit protein mL37; Flags: Precursor	0.59634	0.25665	0.14479	0.99367	0.28587	0.8974	0.33555	0.55461	0.65808	0.17654	-0.091176	0.8989	0.049702	0.99997	0.030507	0.98892	0.82355	0.011788	0.61127	0.13186	0.3863	0.58682	0.53084	0.22639
contig09896	VDAC2_XENLARecName: Full=Voltage-dependent anion-selective channel protein 2; Short=VDAC-2; AltName: Full=Outer mitochondrial membrane protein porin	0.30508	0.87818	0.67883	0.92427	1.3423	0.37748	1.8217	0.032538	0.92918	0.38016	1.063	0.31588	0.22746	0.99997	0.37384	0.86368	1.6253	0.015035	0.87353	0.34191	0.49462	0.7751	0.63659	0.51844
contig09898	SSRG_MOUSERecName: Full=Translocon-associated protein subunit gamma; Short=TRAP-gamma; AltName: Full=Signal sequence receptor subunit gamma; Short=SSR-gamma	0.57878	0.45192	-0.024944	0.99792	0.27324	0.9385	0.50358	0.47582	0.44327	0.55493	-0.60846	0.36991	0.28357	0.99997	0.94104	0.19313	0.98386	0.020009	0.77392	0.14646	0.59109	0.49844	0.8604	0.12584
contig09906	---NA---	-0.078252	0.98211	0.066871	0.99726	-0.22953	0.99043	-1.0886	0.708	4.1678	0.033589	0.5667	0.74759	-0.75751	0.99997	-0.28419	0.9652	0.76327	0.54438	0.25299	0.89605	0.29634	0.94966	0.48509	0.76338
contig09907	HXK2_DROMERecName: Full=Hexokinase type 2	0.14494	0.88052	0.011957	0.99816	0.14411	0.96275	0.57052	0.21972	0.19359	0.79531	-0.00032557	0.99975	-0.045581	0.99997	-0.22378	0.80672	0.85147	0.0091866	0.56108	0.17064	0.35546	0.62588	0.25594	0.6072
contig09917	---NA---	0.36308	0.56546	0.24563	0.96412	0.4476	0.70159	1.1303	0.004997	0.32434	0.57256	0.5143	0.31272	0.51411	0.85357	0.060244	0.97243	1.288	0.0004311	0.90445	0.022676	0.061702	0.95976	0.024889	0.9719
contig09922	---NA---	0.34791	0.82726	-0.069091	0.9957	-0.37856	0.94661	-1.1384	0.23173	-0.032004	0.98818	0.2494	0.83483	-0.24238	0.99997	-0.14466	0.95947	1.302	0.044284	0.58861	0.49973	-0.23156	0.91484	-0.22742	0.82755
contig09926	---NA---	0.83884	0.054753	0.6969	0.25705	0.77496	0.12521	1.4074	9.8929e-05	0.85481	0.049661	0.49968	0.29005	0.37671	0.99997	0.40104	0.49936	1.3595	0.00010463	1.3212	0.00028294	0.82241	0.11281	0.9668	0.014334
contig09928	YAM3_SCHPORecName: Full=Putative oxidoreductase C1F5.03c	1.0043	0.35663	0.58356	0.94381	0.29816	0.96087	0.68073	0.54152	0.73095	0.50563	-0.045776	0.97665	0.83879	0.98986	0.82765	0.53278	1.3659	0.031583	0.95546	0.26382	0.37384	0.83396	1.2591	0.14131
contig09936	---NA---	0.44002	0.5446	-0.2432	0.98049	-0.46633	0.77796	-0.57203	0.30996	0.74219	0.18545	0.32682	0.60974	-0.43978	0.99997	-0.14848	0.9184	0.92	0.014581	0.0070367	0.99442	-0.45455	0.57708	0.060956	0.93704
contig09941	MTREX_MOUSERecName: Full=Exosome RNA helicase MTR4; AltName: Full=ATP-dependent helicase SKIV2L2; AltName: Full=Superkiller viralicidic activity 2-like 2; AltName: Full=TRAMP-like complex helicase	0.20208	0.92941	-0.6925	0.92229	-0.23711	0.97068	-0.31427	0.84046	0.12107	0.95736	0.22714	0.87498	-0.13433	0.99997	-0.76797	0.59873	1.6131	0.016533	-0.13139	0.92781	-1.5282	0.22217	-0.016079	0.99137
contig09947	MUL1_XENLARecName: Full=Mitochondrial ubiquitin ligase activator of nfkb 1; AltName: Full=E3 ubiquitin-protein ligase mul1; AltName: Full=RING-type E3 ubiquitin transferase nfkb 1	0.1129	0.90721	-0.053526	0.99454	0.13729	0.9625	0.34923	0.49976	0.37431	0.46179	-0.035822	0.96099	-0.071987	0.99997	-0.1883	0.84012	0.72296	0.017942	0.33374	0.45194	0.24326	0.75594	0.43602	0.30018
contig09949	---NA---	0.13469	0.95532	-0.99479	0.70947	0.0022434	0.99974	0.73015	0.50225	0.090454	0.96588	-0.31565	0.80143	-0.21079	0.99997	-0.65499	0.74199	1.3837	0.029969	1.144	0.15877	0.71677	0.71139	0.9695	0.32936
contig09951	BAZ2B_HUMANRecName: Full=Bromodomain adjacent to zinc finger domain protein 2B; AltName: Full=hWALp4	0.68597	0.24906	0.47298	0.83264	0.31872	0.90055	0.77303	0.1236	0.94045	0.085514	-0.049109	0.95508	0.26293	0.99997	0.31865	0.72803	0.9968	0.0078312	0.96912	0.031678	0.29491	0.75398	0.53672	0.28739
contig09952	RANB9_HUMANRecName: Full=Ran-binding protein 9; Short=RanBP9; AltName: Full=BPM-L; AltName: Full=BPM90; AltName: Full=Ran-binding protein M; Short=RanBPM; AltName: Full=RanBP7	-0.1073	0.92082	-0.52125	0.68294	0.25276	0.92363	0.64536	0.15172	0.34777	0.54443	-0.37609	0.47771	-0.3649	0.99997	-0.33743	0.64824	0.87449	0.0083155	0.66021	0.10087	0.47254	0.47926	0.88627	0.039667
contig09957	AP2S1_RATRecName: Full=AP-2 complex subunit sigma; AltName: Full=Adaptor protein complex AP-2 subunit sigma; AltName: Full=Adaptor-related protein complex 2 subunit sigma; AltName: Full=Clathrin assembly protein 2 sigma small chain; AltName: Full=Clathrin coat assembly protein AP17; AltName: Full=Clathrin coat-associated protein AP17; AltName: Full=Plasma membrane adaptor AP-2 17 kDa protein; Alt…	0.50864	0.25091	0.10254	0.9938	0.2103	0.92409	0.32988	0.46593	0.58956	0.15162	0.0047575	0.99306	0.22714	0.99997	0.058052	0.96758	0.60525	0.025778	0.43386	0.22237	0.42954	0.43328	0.41109	0.27288
contig09966	---NA---	0.36716	0.84889	-0.10928	0.99639	-0.27552	0.97425	-0.18576	0.92632	1.1979	0.2506	1.395	0.20814	0.088247	0.99997	-1.0937	0.60865	2.1811	0.0068899	-0.34339	0.80723	0.068519	0.97889	-0.20059	0.8775
contig09967	NPC2_HUMANRecName: Full=NPC intracellular cholesterol transporter 2; AltName: Full=Epididymal secretory protein E1; AltName: Full=Human epididymis-specific protein 1; Short=He1; AltName: Full=Niemann-Pick disease type C2 protein; Flags: Precursor	0.85257	0.52426	-0.34954	0.99062	0.23988	0.97236	0.53145	0.69547	0.54962	0.69681	-0.32554	0.81608	0.065523	0.99997	0.65498	0.69855	1.5667	0.02439	1.0518	0.25682	0.57326	0.7473	1.5171	0.10049
contig09968	DDX58_HUMANRecName: Full=Probable ATP-dependent RNA helicase DDX58; AltName: Full=DEAD box protein 58; AltName: Full=RIG-I-like receptor 1; Short=RLR-1; AltName: Full=Retinoic acid-inducible gene 1 protein; Short=RIG-1; AltName: Full=Retinoic acid-inducible gene I protein; Short=RIG-I	0.2007	0.90025	-0.25058	0.99198	0.14648	0.9794	0.0094895	0.99451	0.4287	0.66949	-0.21575	0.83701	-0.33366	0.99997	0.52153	0.65588	1.356	0.0089108	0.73489	0.28391	-0.24562	0.87051	0.85567	0.21313
contig09970	UBL7_HUMANRecName: Full=Ubiquitin-like protein 7; AltName: Full=Bone marrow stromal cell ubiquitin-like protein; Short=BMSC-UbP; AltName: Full=Ubiquitin-like protein SB132	0.57993	0.48068	-0.35057	0.95957	-0.14018	0.97543	0.12473	0.91312	0.31025	0.74505	0.059579	0.95484	-0.36827	0.99997	-0.31725	0.79682	0.89724	0.040576	0.81999	0.14151	0.64995	0.47583	0.93828	0.11132
contig09976	NP1L1_BOVINRecName: Full=Nucleosome assembly protein 1-like 1; Flags: Precursor	0.49364	0.58333	-0.25138	0.98482	0.1118	0.98305	0.47159	0.54765	0.41859	0.62025	0.35535	0.65286	-0.4601	0.99997	-0.62787	0.4842	1.4574	0.0023815	0.70084	0.23388	0.10733	0.94711	0.74741	0.21766
contig09980	LACH_SCHAMRecName: Full=Lachesin; Flags: Precursor	0.80938	0.51541	-0.15451	0.99454	-0.69075	0.8455	-0.17026	0.91959	-0.38074	0.80436	-0.5081	0.69748	-0.25163	0.99997	-0.66601	0.74282	1.6023	0.028366	1.0145	0.30646	0.14758	0.95691	0.51863	0.65293
contig09984	---NA---	0.11887	0.95511	-0.59668	0.94027	0.0083775	0.99943	-0.16301	0.93885	0.42719	0.75585	0.18505	0.8794	-0.1717	0.99997	-1.856	0.30966	1.7047	0.010195	1.0436	0.14949	-1.9648	0.22737	-2.2384	0.042597
contig09992	OBSCN_DROMERecName: Full=Obscurin; AltName: Full=Muscle M-line assembly protein Unc-89	0.031119	0.98992	-0.51985	0.94095	-1.1818	0.33666	-0.99683	0.21774	-0.07548	0.96728	0.1296	0.91858	-0.4069	0.99997	0.083037	0.98129	1.2689	0.040398	0.26694	0.7931	-0.42299	0.76949	0.1015	0.92943
contig09996	---NA---	0.65916	0.47311	0.11514	0.99454	-0.3547	0.94054	0.28707	0.82141	-0.099465	0.95787	-0.089788	0.93824	0.7927	0.94732	0.35709	0.82882	1.6386	0.0050168	1.5605	0.013355	0.52574	0.6983	0.81177	0.29052
contig09997	RT35_HUMANRecName: Full=28S ribosomal protein S35, mitochondrial; Short=MRP-S35; Short=S35mt; AltName: Full=28S ribosomal protein S28, mitochondrial; Short=MRP-S28; Short=S28mt; AltName: Full=Mitochondrial small ribosomal subunit protein mS35; Flags: Precursor	0.25428	0.89535	-0.98126	0.70473	0.24236	0.97171	0.54806	0.68417	-0.40333	0.77187	-0.45159	0.68435	-0.16844	0.99997	0.39575	0.87797	2.14	0.0041015	1.932	0.015436	0.63893	0.74286	1.3572	0.15047
contig10003	SPF30_DANRERecName: Full=Survival of motor neuron-related-splicing factor 30; AltName: Full=Survival motor neuron domain-containing protein 1	-0.86339	0.73888	-0.22387	0.99454	-0.33291	0.98097	-1.3143	0.58246	-0.76652	0.7451	-0.027011	0.99081	-0.37383	0.99997	-0.53531	0.88956	2.6045	0.018297	0.64998	0.73209	-0.56783	0.85717	0.20145	0.92873
contig10009	---NA---	0.23117	0.88685	-0.19712	0.9938	1.8172	0.20905	2.0724	0.034387	0.3064	0.80825	-0.1874	0.88564	-0.45247	0.99997	-0.27621	0.87797	0.29604	0.61745	0.37161	0.6736	0.2846	0.85334	0.81009	0.27036
contig10012	S14L2_BOVINRecName: Full=SEC14-like protein 2; AltName: Full=Alpha-tocopherol-associated protein; Short=TAP; Short=bTAP	1.0649	0.075144	0.29679	0.97048	0.65219	0.58164	0.60233	0.32548	0.89798	0.13834	0.29563	0.68176	0.7506	0.69146	0.86688	0.21982	1.1952	0.0043863	0.92797	0.061953	0.86887	0.25468	1.377	0.010968
contig10026	---NA---	0.61928	0.39082	0.077522	0.99454	0.3401	0.9127	0.79572	0.17253	0.4613	0.5225	-0.25893	0.73528	-0.092085	0.99997	0.47766	0.59743	0.9566	0.021307	0.78094	0.13427	0.32814	0.75822	0.72971	0.19352
contig10027	CSN4_RATRecName: Full=COP9 signalosome complex subunit 4; Short=SGN4; Short=Signalosome subunit 4; AltName: Full=JAB1-containing signalosome subunit 4	0.19388	0.89356	-0.31743	0.97898	-0.049881	0.99544	0.009877	0.9943	-0.011315	0.99607	-0.3206	0.70314	-0.019043	0.99997	0.51978	0.61632	1.3129	0.0062687	0.20844	0.80914	-0.17327	0.90974	0.33892	0.64588
contig10028	---NA---	-0.22892	0.93273	-0.085557	0.99719	-0.97972	0.86324	-0.61655	0.75936	0.11454	0.97507	0.71873	0.59187	0.8805	0.99997	0.65793	0.78361	1.5548	0.048158	0.71542	0.55683	-0.11498	0.97069	0.57798	0.68367
contig10037	PEX26_MACFARecName: Full=Peroxisome assembly protein 26; AltName: Full=Peroxin-26	0.48349	0.27009	0.030786	0.99639	0.61469	0.25253	0.72092	0.037209	0.68282	0.088108	0.067343	0.91226	0.1162	0.99997	0.20193	0.78036	0.93113	0.0014926	0.80721	0.015876	0.56153	0.27109	0.81044	0.024423
contig10044	---NA---	-0.06022	0.95741	-0.41787	0.78016	-0.16698	0.94761	-0.0052218	0.99476	-0.21188	0.73827	-0.46745	0.32496	0.0085987	0.99997	0.16539	0.86593	0.77466	0.010159	0.2257	0.64016	-0.033155	0.97554	0.30844	0.47646
contig10046	---NA---	1.0445	0.34569	0.80992	0.85328	-0.094533	0.99356	-0.018142	0.99298	0.39269	0.7937	1.5524	0.13201	0.29222	0.99997	-0.57386	0.79449	1.8194	0.046907	-0.2229	0.86165	-0.18419	0.95988	0.13751	0.92723
contig10052	MF14B_HUMANRecName: Full=Hippocampus abundant transcript-like protein 1; AltName: Full=Major facilitator superfamily domain-containing 14B	0.54486	0.81622	-0.020171	0.99864	-0.13938	0.99239	-0.13095	0.96096	0.2853	0.91195	2.2027	0.10468	1.4091	0.94732	0.85615	0.72378	2.1503	0.027805	1.041	0.40222	0.39902	0.90912	0.91918	0.52739
contig10058	THUM3_BOVINRecName: Full=THUMP domain-containing protein 3	0.29409	0.69823	-0.012073	0.99832	0.22163	0.93493	0.39304	0.48812	0.73545	0.14688	0.24882	0.67924	0.10854	0.99997	-0.11073	0.93746	0.88113	0.0098794	0.40908	0.38969	0.28554	0.73734	0.45702	0.32843
contig10061	PTGR3_HUMANRecName: Full=Prostaglandin reductase 3; Short=PRG-3; AltName: Full=Zinc-binding alcohol dehydrogenase domain-containing protein 2	-0.16177	0.97203	-0.61687	0.98605	1.6402	0.7746	0.30655	0.92806	1.1314	0.65217	-0.43273	0.84134	0.85854	0.99997	0.60028	0.85968	2.3788	0.015525	0.79258	0.53281	0.38602	0.92987	0.90097	0.57388
contig10067	CATK_CANFARecName: Full=Cathepsin K; Flags: Precursor	-0.071118	0.98303	-0.5988	0.97942	-0.47458	0.95221	0.16948	0.94439	0.081482	0.97588	-1.6041	0.27516	0.37408	0.99997	1.1498	0.54359	2.0114	0.015101	1.3678	0.19302	0.56515	0.82066	1.2883	0.30711
contig10071	S39A9_HUMANRecName: Full=Zinc transporter ZIP9; AltName: Full=Solute carrier family 39 member 9; AltName: Full=Zrt- and Irt-like protein 9; Short=ZIP-9	-0.21309	0.86027	-0.57665	0.79777	-0.29551	0.93429	0.13737	0.8971	0.15023	0.89997	0.44516	0.52482	0.22951	0.99997	-0.23433	0.86593	1.0417	0.01403	0.084496	0.92551	0.20403	0.86975	0.63045	0.27716
contig10078	---NA---	0.34677	0.68657	-0.1758	0.99367	0.063607	0.9913	0.46533	0.4677	0.36193	0.61736	0.46401	0.45977	-0.28725	0.99997	-0.30641	0.76045	1.1186	0.005137	0.47521	0.38225	0.32719	0.73734	0.47163	0.388
contig10084	---NA---	0.54768	0.27053	0.28759	0.94027	0.34346	0.82148	0.59557	0.15964	0.64337	0.159	0.13096	0.83384	0.21741	0.99997	0.44836	0.45225	0.83168	0.0075464	0.5175	0.18472	0.26137	0.73189	0.43675	0.29889
contig10085	ECI2_MOUSERecName: Full=Enoyl-CoA delta isomerase 2, mitochondrial; AltName: Full=Delta(3),delta(2)-enoyl-CoA isomerase; Short=D3,D2-enoyl-CoA isomerase; AltName: Full=Dodecenoyl-CoA isomerase; AltName: Full=Peroxisomal 3,2-trans-enoyl-CoA isomerase; Short=pECI; Flags: Precursor	0.17944	0.8457	0.033146	0.99719	0.50228	0.64555	0.56897	0.23387	0.73927	0.13509	0.23345	0.69144	-0.069766	0.99997	0.29236	0.71833	1.0126	0.0033903	0.58749	0.15822	0.30064	0.71176	0.85213	0.05146
contig10089	TPC13_XENTRRecName: Full=Trafficking protein particle complex subunit 13	0.37782	0.43944	-0.015688	0.99792	0.093165	0.97236	0.061927	0.93163	0.40868	0.33867	-0.18058	0.71555	0.00013494	0.99997	0.11007	0.91486	0.65067	0.016819	0.29646	0.45273	0.071106	0.94135	0.46669	0.20123
contig10096	UBC28_ARATHRecName: Full=Ubiquitin-conjugating enzyme E2 28; AltName: Full=AtUBC9A; AltName: Full=E2 ubiquitin-conjugating enzyme 28; AltName: Full=Ubiquitin carrier protein 28	0.38092	0.76574	-0.50334	0.93504	0.14915	0.97954	0.48084	0.61082	0.27692	0.82887	0.41806	0.64635	-0.27688	0.99997	-0.26565	0.88105	1.0466	0.041389	0.65788	0.36427	0.49486	0.69495	0.71671	0.32035
contig10101	CCYL1_DANRERecName: Full=Cyclin-Y-like protein 1	0.6337	0.68232	-0.62956	0.94583	-0.69746	0.89373	-0.66543	0.64842	-0.29875	0.8733	-0.014162	0.99224	-0.72218	0.99997	-0.54611	0.76631	2.4916	0.0028113	0.50215	0.66096	-0.11867	0.96396	0.29012	0.81395
contig10102	OST48_PONABRecName: Full=Dolichyl-diphosphooligosaccharide--protein glycosyltransferase 48 kDa subunit; Short=DDOST 48 kDa subunit; Short=Oligosaccharyl transferase 48 kDa subunit; Flags: Precursor	0.96656	0.090431	0.75055	0.47849	0.22049	0.94661	0.54054	0.36175	0.70362	0.21979	-0.16018	0.83827	0.37374	0.99997	1.156	0.033953	1.219	0.0026064	0.78028	0.098847	0.20607	0.85164	0.65928	0.20021
contig10103	---NA---	0.58633	0.30877	0.36948	0.9111	0.65385	0.4495	0.99051	0.025638	0.45943	0.41259	-0.18445	0.78287	0.1646	0.99997	0.17391	0.88467	0.50399	0.13551	0.69702	0.1052	0.5711	0.40402	0.78598	0.086729
contig10105	---NA---	0.73668	0.077289	0.46958	0.65343	0.091207	0.975	0.52563	0.18549	0.56709	0.17789	-0.040383	0.95209	0.24602	0.99997	0.4178	0.44549	1.039	0.00087893	0.87489	0.012843	0.55932	0.30205	0.89322	0.017627
contig10106	FNTA_BOVINRecName: Full=Protein farnesyltransferase/geranylgeranyltransferase type-1 subunit alpha; AltName: Full=CAAX farnesyltransferase subunit alpha; AltName: Full=FTase-alpha; AltName: Full=Ras proteins prenyltransferase subunit alpha; AltName: Full=Type I protein geranyl-geranyltransferase subunit alpha; Short=GGTase-I-alpha	0.5712	0.46108	0.0036129	0.99948	0.229	0.94921	0.652	0.30638	0.66021	0.31966	0.14101	0.87809	-0.15384	0.99997	-0.26788	0.83398	1.031	0.015485	0.74669	0.16538	0.69271	0.40702	0.76593	0.18056
contig10110	CSN1_XENLARecName: Full=COP9 signalosome complex subunit 1; Short=Signalosome subunit 1	0.32615	0.63383	-0.18336	0.98482	0.22404	0.93429	0.39336	0.46868	0.30994	0.61185	-0.13985	0.83483	-0.17828	0.99997	-0.18655	0.8602	0.74051	0.023169	0.42911	0.34239	0.38632	0.5916	0.72874	0.091303
contig10111	---NA---	0.38575	0.37638	-0.10891	0.9938	0.057224	0.98559	0.31825	0.44385	0.3132	0.4585	-0.51156	0.20645	-0.019659	0.99997	0.24891	0.67561	0.51784	0.038852	0.62954	0.043699	0.45669	0.35918	0.81111	0.016849
contig10119	UBXN1_XENTRRecName: Full=UBX domain-containing protein 1; AltName: Full=SAPK substrate protein 1	0.38885	0.52881	-0.098155	0.9938	0.049386	0.99158	0.35215	0.52404	0.37173	0.49751	0.16916	0.7854	-0.011837	0.99997	0.0025199	0.99921	0.94892	0.0045116	0.35777	0.44259	-0.11394	0.91537	0.11419	0.84652
contig10123	CLU_AEDAERecName: Full=Clustered mitochondria protein homolog	0.068504	0.96783	0.1202	0.9938	0.40743	0.8974	1.0412	0.098837	-0.55955	0.47255	0.339	0.63984	-0.36559	0.99997	-0.34706	0.78165	1.1928	0.011781	0.044397	0.96428	-0.40264	0.7299	0.10438	0.90977
contig10138	GPX1_SCHMARecName: Full=Glutathione peroxidase; Short=GPX	0.79856	0.47306	-0.11554	0.99454	0.33672	0.94794	0.82979	0.38337	0.43826	0.73179	-0.11639	0.93401	-0.15611	0.99997	0.57564	0.69047	1.441	0.017399	0.96682	0.21902	0.36441	0.82692	1.3833	0.083561
contig10149	MIB2_CHICKRecName: Full=E3 ubiquitin-protein ligase MIB2; AltName: Full=Mind bomb homolog 2; AltName: Full=RING-type E3 ubiquitin transferase MIB2	0.24486	0.6997	-0.19458	0.97811	-0.019808	0.99645	-0.029689	0.96976	0.31194	0.52434	-0.44576	0.32067	-0.16089	0.99997	0.31244	0.61805	0.70813	0.012691	0.39109	0.3068	-0.1835	0.81109	0.38035	0.33158
contig10158	PSMD5_BOVINRecName: Full=26S proteasome non-ATPase regulatory subunit 5	-0.097077	0.96625	-0.47008	0.9585	0.071075	0.99402	0.17509	0.90295	-0.19105	0.90771	0.17969	0.8839	-0.077018	0.99997	-0.62999	0.66788	1.4279	0.023913	0.86561	0.24643	-0.19949	0.92517	0.32272	0.76328
contig10161	---NA---	0.46477	0.42758	0.55817	0.6377	0.46203	0.69701	1.1462	0.0053341	0.83243	0.087379	0.59666	0.25864	0.19685	0.99997	0.045102	0.983	0.69354	0.032466	0.50657	0.23944	0.29966	0.7109	0.20516	0.69825
contig10167	CL004_MOUSERecName: Full=Protein C12orf4 homolog	0.18907	0.77809	-0.21157	0.95902	-0.018429	0.99645	0.15217	0.79349	0.70613	0.07359	-0.10454	0.84991	-0.06384	0.99997	-0.22318	0.74141	0.79007	0.0043487	0.33664	0.36522	0.31062	0.59747	0.52815	0.13704
contig10178	PROF_BRABERecName: Full=Profilin	0.94245	0.13731	0.2351	0.98482	-0.28473	0.93429	-0.13014	0.90201	0.24973	0.79645	-0.32749	0.65503	0.24497	0.99997	0.74991	0.33483	0.87105	0.034424	1.0084	0.049148	0.43626	0.64855	1.0938	0.047629
contig10179	---NA---	0.99138	0.14591	0.084588	0.99454	0.32101	0.93368	1.1362	0.04997	0.22674	0.8387	0.025128	0.98229	-0.10883	0.99997	0.71989	0.39666	1.2315	0.0070524	1.2727	0.021533	0.77451	0.37998	0.97274	0.098713
contig10182	---NA---	0.65407	0.23234	0.10989	0.9938	0.23828	0.93429	0.34899	0.55875	0.60369	0.23877	0.014951	0.98601	0.095913	0.99997	0.52444	0.42599	1.1988	0.0013131	0.85548	0.041175	0.50129	0.47383	0.93004	0.039229
contig10184	---NA---	0.42324	0.28867	0.16536	0.97898	0.33022	0.72711	0.34753	0.35593	0.50983	0.16242	-0.086228	0.86671	-0.042838	0.99997	-0.039515	0.97897	0.64439	0.0090879	0.51089	0.089148	0.40331	0.4011	0.64622	0.045353
contig10186	NMT1_PONABRecName: Full=Glycylpeptide N-tetradecanoyltransferase 1; AltName: Full=Myristoyl-CoA:protein N-myristoyltransferase 1; Short=NMT 1; Short=Type I N-myristoyltransferase; AltName: Full=Peptide N-myristoyltransferase 1	1.0086	0.41239	0.13479	0.99454	-0.393	0.95537	0.99096	0.43521	0.54612	0.69755	1.4227	0.2039	0.87913	0.99997	0.35305	0.91233	1.5303	0.047217	0.6059	0.57701	1.0329	0.52469	0.86195	0.44082
contig10200	ANTA_HYDVURecName: Full=Antistasin; Short=ATS; AltName: Full=Blood coagulation factor Xa/proclotting enzyme inhibitor; Flags: Precursor	-0.10046	0.97583	-0.43163	0.99367	-1.1211	0.87792	-0.27913	0.93156	-0.64631	0.73958	-0.84196	0.58532	1.3072	0.9947	0.6019	0.8212	1.7013	0.037352	1.1849	0.28252	-0.71243	0.76018	0.47144	0.75987
contig10201	MFAP1_DROMERecName: Full=Microfibrillar-associated protein 1; AltName: Full=Spliceosome B complex protein MFAP1	0.31523	0.80175	-0.067163	0.99556	-0.52442	0.82862	-1.2657	0.039325	0.56556	0.48283	0.34292	0.68635	-0.089416	0.99997	0.21454	0.90132	0.47639	0.302	0.0041754	0.99736	-0.093438	0.95876	0.23003	0.77982
contig10206	---NA---	0.19054	0.87258	-0.048188	0.9957	0.36627	0.89224	1.076	0.038421	0.28433	0.74259	0.10927	0.90357	0.3107	0.99997	-0.12451	0.94344	0.79313	0.04618	0.63765	0.22616	0.71321	0.37157	0.81973	0.12618
contig10211	CSN3_DANRERecName: Full=COP9 signalosome complex subunit 3; Short=Signalosome subunit 3	0.72108	0.18895	-0.10165	0.9938	0.31144	0.8946	0.30631	0.63481	0.82927	0.11598	0.12226	0.8695	-0.18643	0.99997	-0.27074	0.76942	1.1254	0.0024946	0.63064	0.15354	0.29653	0.73734	0.68933	0.13986
contig10214	---NA---	0.62429	0.35041	0.22284	0.98482	0.54913	0.70351	1.0932	0.030249	0.99136	0.091633	0.57671	0.36144	0.17833	0.99997	0.02481	0.99221	1.0371	0.0095099	0.61638	0.23319	0.46992	0.58726	0.56389	0.30018
contig10218	---NA---	0.61225	0.2148	0.42121	0.80023	0.44406	0.6881	0.76025	0.060335	0.64509	0.16542	-0.026088	0.97259	0.36739	0.99997	0.75723	0.12859	0.81745	0.0092054	0.98143	0.011293	0.81164	0.15077	0.80836	0.048986
contig10220	CSK2B_DANRERecName: Full=Casein kinase II subunit beta; Short=CK II beta	0.58768	0.14414	0.092869	0.9938	0.36368	0.71337	0.45841	0.23064	0.61572	0.11782	-0.25516	0.56378	-0.072375	0.99997	0.19269	0.78942	0.68431	0.010248	0.56568	0.082201	0.46242	0.37518	0.67162	0.055696
contig10222	---NA---	1.4427	0.20145	0.50424	0.97602	0.58747	0.91085	1.0388	0.3458	1.0884	0.3326	-0.20503	0.89705	0.46718	0.99997	1.4619	0.24993	1.472	0.037493	1.3231	0.14144	1.0024	0.49639	1.9161	0.043481
contig10225	COMD4_MOUSERecName: Full=COMM domain-containing protein 4	0.22502	0.76832	-0.42102	0.80049	0.22924	0.92831	0.34387	0.514	0.40153	0.42477	-0.29269	0.57437	-0.0037651	0.99997	-0.14924	0.89157	0.76747	0.013558	0.69993	0.065913	0.6109	0.30563	0.85056	0.037641
contig10242	U2AF1_BOVINRecName: Full=Splicing factor U2AF 35 kDa subunit; AltName: Full=U2 auxiliary factor 35 kDa subunit; AltName: Full=U2 snRNP auxiliary factor small subunit	0.48048	0.43835	0.30382	0.95082	0.64322	0.45813	0.79235	0.085112	1.1777	0.015877	0.56587	0.30333	0.092693	0.99997	-0.12765	0.92704	0.53127	0.11331	0.426	0.37917	0.57782	0.39653	0.69254	0.13048
contig10247	SEN15_HUMANRecName: Full=tRNA-splicing endonuclease subunit Sen15; AltName: Full=SEN15 homolog; Short=HsSEN15; AltName: Full=tRNA-intron endonuclease Sen15	0.41771	0.32132	-0.12127	0.99305	0.21925	0.89962	0.073911	0.90932	0.19942	0.69392	-0.32565	0.42604	-0.14481	0.99997	0.03115	0.98553	0.78511	0.0031349	0.41241	0.20617	0.038102	0.96665	0.44123	0.19462
contig10257	---NA---	0.40578	0.72617	-0.25323	0.98971	-0.11594	0.98504	0.35915	0.71726	0.81434	0.28864	-0.30337	0.74219	-0.07817	0.99997	0.23677	0.89339	1.5476	0.0032111	0.85987	0.17631	-0.056443	0.97509	0.57403	0.41908
contig10259	DYM_CHICKRecName: Full=Dymeclin	0.82464	0.57518	-0.42146	0.98482	0.37824	0.96179	0.6668	0.67288	0.37828	0.83724	1.7442	0.13265	-0.33169	0.99997	-0.77715	0.64432	1.8738	0.023772	0.59615	0.61271	0.31711	0.88908	-0.020635	0.98997
contig10263	---NA---	0.61101	0.61715	0.45639	0.96407	0.19103	0.975	0.084917	0.95854	0.062647	0.97457	0.74957	0.43635	0.03299	0.99997	0.2184	0.92749	1.7955	0.003822	0.054299	0.96993	-0.32566	0.84866	0.19303	0.86293
contig10266	---NA---	0.41047	0.83604	-0.21499	0.9938	0.51207	0.93429	0.93935	0.41719	0.49259	0.7514	0.099427	0.95418	0.5503	0.99997	1.3134	0.32282	1.4161	0.045361	1.101	0.2446	0.88985	0.56452	1.829	0.055777
contig10273	ARRD3_MOUSERecName: Full=Arrestin domain-containing protein 3	0.1222	0.90176	0.13594	0.9938	0.17918	0.94689	0.46897	0.32871	0.58495	0.21734	0.092027	0.89512	0.26846	0.99997	0.33238	0.64284	0.73545	0.019789	0.55717	0.16412	0.16375	0.85714	0.34579	0.44514
contig10275	ACHA2_PANTRRecName: Full=Neuronal acetylcholine receptor subunit alpha-2; Flags: Precursor	0.20946	0.94666	-0.027042	0.99861	0.3171	0.97404	1.0355	0.57905	-0.15542	0.95696	-0.58797	0.73897	0.2301	0.99997	1.8413	0.43534	1.6682	0.049961	1.5762	0.14709	-0.066252	0.98989	1.1175	0.53554
contig10277	CO1A1_CHICKRecName: Full=Collagen alpha-1(I) chain; AltName: Full=Alpha-1 type I collagen; Flags: Precursor	0.76015	0.51377	0.2924	0.99305	-0.027271	0.99794	0.72947	0.47411	-0.0023948	0.9993	-0.63223	0.53427	0.17175	0.99997	-0.017876	0.99684	1.4774	0.016142	0.35149	0.74123	-0.70406	0.6577	0.19991	0.87778
contig10286	---NA---	0.56807	0.30992	0.26432	0.9596	0.2611	0.92363	0.31591	0.60426	0.40505	0.47363	0.38609	0.48291	0.26106	0.99997	0.17901	0.87431	0.93936	0.0066242	0.77204	0.062942	0.1836	0.84986	0.4319	0.36201
contig10287	ELYS_HUMANRecName: Full=Protein ELYS; AltName: Full=Embryonic large molecule derived from yolk sac; AltName: Full=Protein MEL-28; AltName: Full=Putative AT-hook-containing transcription factor 1	0.96981	0.43974	0.33144	0.9938	0.21794	0.9822	0.37994	0.84834	1.3898	0.18957	0.87588	0.43696	-1.5428	0.93789	0.24072	0.94876	2.5792	0.01708	1.5168	0.28156	0.2762	0.93955	-0.23952	0.86908
contig10299	---NA---	0.43317	0.53047	0.019107	0.99792	0.1958	0.94886	0.63682	0.21972	0.66897	0.21553	-0.1266	0.86807	-0.011142	0.99997	0.091699	0.95778	1.0617	0.00446	0.62942	0.16815	0.17941	0.86381	0.66935	0.16538
contig10310	AK1A1_BOVINRecName: Full=Aldo-keto reductase family 1 member A1; AltName: Full=Alcohol dehydrogenase	0.46739	0.57104	-0.30652	0.97046	0.17357	0.96522	0.069001	0.95131	0.75808	0.22757	0.28062	0.71097	-0.10238	0.99997	-0.53756	0.53321	1.227	0.0045477	0.60226	0.28254	0.17081	0.89598	0.53374	0.36234
contig10317	TDH_BOVINRecName: Full=L-threonine 3-dehydrogenase, mitochondrial; Flags: Precursor	0.76649	0.15511	0.67757	0.4983	0.37887	0.83887	0.81086	0.082865	0.84978	0.10621	0.067187	0.9343	1.0792	0.070959	1.1936	0.01357	0.83977	0.016811	0.74039	0.087397	0.64285	0.34851	0.91532	0.049209
contig10319	RIOK1_HUMANRecName: Full=Serine/threonine-protein kinase RIO1; AltName: Full=RIO kinase 1	0.14913	0.94	-0.39931	0.97445	-0.92167	0.57053	-1.0202	0.20255	-0.56084	0.58075	-0.54413	0.56336	-0.1973	0.99997	-0.43364	0.7695	1.5556	0.013828	0.27043	0.79032	0.0070788	0.99717	-0.16338	0.87833
contig10332	---NA---	0.19122	0.94084	-0.28748	0.9938	0.51278	0.93429	0.43124	0.78263	-0.16121	0.94551	0.25934	0.8654	-0.54583	0.99997	-1.0681	0.45373	2.0093	0.0070421	1.1926	0.20489	-0.2516	0.91789	0.18234	0.89756
contig10338	FAM50_DROMERecName: Full=Protein FAM50 homolog	0.16258	0.80224	-0.055432	0.99454	-0.051042	0.98809	0.19705	0.67663	0.52473	0.15764	-0.34633	0.38102	0.067023	0.99997	0.2442	0.67045	0.59641	0.015907	0.39079	0.22395	0.1131	0.87908	0.76734	0.019731
contig10341	---NA---	-0.015152	0.995	0.76591	0.82604	0.1476	0.9822	0.45788	0.68488	1.4111	0.11299	1.4765	0.10535	0.66365	0.99997	-0.56398	0.72901	2.1937	0.0098866	0.10425	0.95592	-0.64338	0.7171	0.093522	0.94433
contig10342	F210A_CHICKRecName: Full=Protein FAM210A	0.36204	0.464	-0.027323	0.99719	0.61047	0.26465	0.66665	0.059016	0.55251	0.17353	0.12704	0.8128	-0.28829	0.99997	-0.13958	0.87819	0.9111	0.0018	0.58204	0.080821	0.017145	0.98835	0.27188	0.49202
contig10344	---NA---	0.23544	0.85871	-1.0294	0.33509	-0.22347	0.95819	-0.34856	0.69749	0.02589	0.98753	0.46329	0.54691	-1.5582	0.030087	-2.0299	0.030874	0.65163	0.14625	0.46365	0.50067	-0.24395	0.85448	0.25031	0.74652
contig10345	FICD_XENTRRecName: Full=Protein adenylyltransferase FICD; AltName: Full=AMPylator FICD; AltName: Full=De-AMPylase FICD; AltName: Full=FIC domain-containing protein	-0.014541	0.99024	-0.056391	0.99454	-0.020407	0.9958	-0.15106	0.80192	0.44644	0.28583	-0.3378	0.44409	0.18149	0.99997	0.14991	0.86774	0.55306	0.039799	0.22825	0.59371	0.24623	0.71526	0.5688	0.11556
contig10348	RT30_BOVINRecName: Full=28S ribosomal protein S30, mitochondrial; Short=MRP-S30; Short=S30mt	0.1877	0.82688	0.30443	0.93439	0.27507	0.89813	0.54067	0.23585	0.86376	0.062482	0.26232	0.6294	0.17023	0.99997	0.28107	0.71632	1.0964	0.001387	0.57701	0.14412	0.15527	0.86578	0.36732	0.40947
contig10350	FLNA_HUMANRecName: Full=Filamin-A; Short=FLN-A; AltName: Full=Actin-binding protein 280; Short=ABP-280; AltName: Full=Alpha-filamin; AltName: Full=Endothelial actin-binding protein; AltName: Full=Filamin-1; AltName: Full=Non-muscle filamin	0.51806	0.47755	-0.19733	0.99061	0.22742	0.94661	0.66237	0.24984	0.61273	0.32055	-0.4099	0.53247	-0.12724	0.99997	0.024365	0.99221	0.78325	0.044071	0.47039	0.40036	0.21048	0.85335	0.60635	0.26217
contig10352	NMD3_XENTRRecName: Full=60S ribosomal export protein NMD3	-0.68545	0.46058	-0.74485	0.74955	0.27837	0.95727	0.80538	0.36213	0.11599	0.94372	-0.32738	0.81904	-0.44715	0.99997	-0.90364	0.4084	2.1693	0.0068143	0.25859	0.80331	-0.93608	0.40493	0.14647	0.87879
contig10364	---NA---	0.58501	0.59497	-0.49626	0.94366	0.46204	0.92539	0.4712	0.72439	0.67867	0.45533	0.23467	0.83293	-0.037989	0.99997	-0.072701	0.98783	1.2202	0.044313	0.59805	0.45124	0.24078	0.91288	0.6537	0.45735
contig10368	SET_RATRecName: Full=Protein SET; AltName: Full=Liver regeneration-related protein LRRGR00002; AltName: Full=Phosphatase 2A inhibitor I2PP2A; Short=I-2PP2A; AltName: Full=Template-activating factor I; Short=TAF-I	0.36767	0.53325	-0.20147	0.97995	0.086063	0.98	0.58687	0.17138	0.44496	0.35855	-0.43814	0.37206	0.040269	0.99997	0.14899	0.89062	0.84561	0.0070532	0.82216	0.029331	0.68269	0.23405	0.74276	0.067165
contig10374	---NA---	0.0095771	0.99699	0.36034	0.9877	0.018021	0.99857	-0.05939	0.97228	-0.37722	0.78318	-0.21923	0.87873	0.68454	0.99997	1.1007	0.38777	1.643	0.03336	0.75862	0.30502	0.96994	0.4799	1.5781	0.056504
contig10377	CIAO3_RATRecName: Full=Cytosolic iron-sulfur assembly component 3; AltName: Full=Cytosolic Fe-S cluster assembly factor NARFL; AltName: Full=Iron-only hydrogenase-like protein 1; Short=IOP1; AltName: Full=Nuclear prelamin A recognition factor-like protein	0.38301	0.51541	-0.047028	0.99519	0.072375	0.98463	-0.060285	0.94127	0.4582	0.34646	-0.18548	0.7453	-0.26601	0.99997	-0.044218	0.98236	0.63819	0.036785	0.31182	0.4983	0.10136	0.92211	0.55762	0.18054
contig10379	CY1_BOVINRecName: Full=Cytochrome c1, heme protein, mitochondrial; AltName: Full=Complex III subunit 4; AltName: Full=Complex III subunit IV; AltName: Full=Cytochrome b-c1 complex subunit 4; AltName: Full=Ubiquinol-cytochrome-c reductase complex cytochrome c1 subunit; Short=Cytochrome c-1; Flags: Precursor	0.24868	0.80771	0.094578	0.99454	0.64584	0.55115	1.2814	0.0084495	-0.014427	0.99216	0.48204	0.44057	0.36877	0.99997	1.0731	0.064967	1.4026	0.0010473	1.1428	0.017395	0.57183	0.47033	1.0153	0.047707
contig10381	ACADM_PIGRecName: Full=Medium-chain specific acyl-CoA dehydrogenase, mitochondrial; Short=MCAD; Flags: Precursor	0.47083	0.19313	0.19376	0.9585	0.26185	0.81699	0.33004	0.35296	0.61016	0.073539	-0.12419	0.7794	0.18976	0.99997	0.40075	0.35328	0.82034	0.0011933	0.4501	0.1151	0.12527	0.85001	0.38705	0.2117
contig10382	---NA---	0.23304	0.82612	-0.29547	0.96591	-0.21613	0.94794	-0.040906	0.96976	0.33511	0.65785	-0.26156	0.71097	-0.32829	0.99997	-0.058545	0.98089	1.1457	0.0044856	0.6289	0.21196	0.41429	0.64256	0.89199	0.081971
contig10383	CEP19_BOVINRecName: Full=Centrosomal protein of 19 kDa; Short=Cep19	0.19332	0.89967	-0.089317	0.99454	0.22277	0.96179	0.025428	0.98654	-0.23069	0.8546	-1.4888	0.044563	0.005307	0.99997	0.41449	0.73387	0.87425	0.067447	0.55348	0.4299	0.19966	0.89602	0.87255	0.18439
contig10388	---NA---	0.76893	0.21726	0.29674	0.96591	0.1592	0.966	0.35174	0.6215	0.46916	0.47243	0.58494	0.34877	0.2943	0.99997	0.42614	0.62524	1.2941	0.0020222	1.045	0.02935	0.34923	0.71754	0.41343	0.46271
contig10393	---NA---	-0.040253	0.98338	-0.10975	0.99454	-0.11148	0.98463	-0.04224	0.97558	-0.21126	0.86805	0.42143	0.60238	-0.31426	0.99997	-0.06358	0.98336	1.1452	0.016391	-0.037932	0.97442	-0.64426	0.51285	-0.29088	0.70711
contig10396	---NA---	1.0597	0.090506	0.13256	0.9938	-0.52085	0.77796	-0.19412	0.84235	0.01137	0.99527	-0.55595	0.41223	-0.71869	0.79661	0.29828	0.79823	0.80779	0.049976	0.6315	0.25507	-0.084572	0.95728	0.41866	0.4948
contig10397	TOM34_RATRecName: Full=Mitochondrial import receptor subunit TOM34; AltName: Full=Translocase of outer membrane 34 kDa subunit	0.21934	0.77356	-0.18215	0.98168	0.10862	0.97013	-0.059582	0.94121	0.45242	0.34644	0.19032	0.73473	-0.27899	0.99997	-0.40774	0.50981	0.68138	0.024806	0.062839	0.92241	-0.11715	0.90483	0.17429	0.73081
contig10404	---NA---	0.36004	0.63137	-0.1144	0.9938	0.13095	0.96995	-0.28684	0.67638	0.46263	0.42943	0.27036	0.67193	-0.045486	0.99997	-0.34162	0.68979	0.78573	0.027374	-0.03577	0.96656	-0.20629	0.8372	0.21531	0.71329
contig10409	TSN9_HUMANRecName: Full=Tetraspanin-9; Short=Tspan-9; AltName: Full=Tetraspan NET-5	0.84653	0.27319	0.2272	0.99305	-0.10908	0.98525	0.38105	0.67228	0.95088	0.17921	0.007334	0.99399	-0.70929	0.99997	-1.4361	0.077305	1.0765	0.022768	0.45265	0.52712	0.2031	0.90453	0.44691	0.57771
contig10415	BIN2_RATRecName: Full=Bridging integrator 2	0.098617	0.98303	-0.80884	0.97207	-0.35484	0.97543	-0.48235	0.85638	0.098073	0.97876	-0.71699	0.7266	-0.56792	0.99997	1.0275	0.70692	2.3117	0.036964	0.84348	0.64323	-0.22637	0.95728	1.4139	0.37024
contig10418	---NA---	0.29583	0.89538	0.048758	0.99792	-0.43016	0.96522	-0.68765	0.7433	0.63146	0.70283	1.1526	0.32529	0.20918	0.99997	-0.22025	0.95947	2.2338	0.041462	-0.13876	0.94422	0.35221	0.88764	0.61817	0.62675
contig10421	TTPAL_MOUSERecName: Full=Alpha-tocopherol transfer protein-like	-0.023401	0.99454	-0.71183	0.95082	-0.62807	0.94378	-0.23126	0.93626	-0.65527	0.68246	-1.0119	0.48431	-0.055602	0.99997	0.37004	0.87977	1.6358	0.042837	0.5785	0.61524	-0.17362	0.95372	-0.056317	0.97164
contig10427	---NA---	-1.0185	0.52853	-0.23841	0.9938	1.141	0.87792	1.0654	0.55277	0.87123	0.66188	0.24693	0.87978	-0.92706	0.99997	-0.9993	0.5798	1.9962	0.044837	-0.25797	0.8619	-1.1455	0.51395	-1.4788	0.20166
contig10430	JUN_SERCARecName: Full=Transcription factor AP-1; AltName: Full=Proto-oncogene c-Jun	0.61386	0.66405	0.26123	0.9938	0.40403	0.94214	0.95197	0.33988	1.5822	0.10415	0.34337	0.78433	-0.12969	0.99997	0.078989	0.98596	1.4986	0.021089	0.64369	0.50923	0.10632	0.96551	1.0022	0.26127
contig10435	---NA---	0.16517	0.8078	-0.24443	0.93793	0.17113	0.93493	0.63311	0.059896	0.4825	0.21099	-0.094888	0.86003	-0.29177	0.99997	-0.38641	0.43903	0.62316	0.015693	0.43915	0.18104	0.40183	0.43834	0.53653	0.11597
contig10446	RT31_BOVINRecName: Full=28S ribosomal protein S31, mitochondrial; Short=MRP-S31; Short=S31mt; Flags: Precursor	0.3626	0.64705	0.46223	0.85207	0.52515	0.69618	1.0305	0.030217	1.0554	0.054325	0.9169	0.10922	-0.038459	0.99997	0.04716	0.98511	1.2115	0.0023185	0.69403	0.13656	0.25918	0.79484	0.65544	0.1911
contig10452	---NA---	0.16866	0.90971	-0.55654	0.86882	0.68282	0.6719	0.13858	0.90795	-0.028753	0.98687	-1.1647	0.10263	0.088283	0.99997	0.34577	0.78394	0.89836	0.049667	0.88968	0.12427	0.74647	0.41865	1.3785	0.025693
contig10454	ST65G_HUMANRecName: Full=STAGA complex 65 subunit gamma; AltName: Full=Adenocarcinoma antigen ART1; AltName: Full=SPTF-associated factor 65 gamma; Short=STAF65gamma; AltName: Full=Suppressor of Ty 7-like	0.29045	0.75642	-0.24526	0.98162	-0.046366	0.99458	-0.39496	0.55916	0.23201	0.79531	0.21132	0.77532	-0.013444	0.99997	-0.21282	0.86747	0.93589	0.015644	0.2076	0.76025	0.096304	0.94436	0.2546	0.6818
contig10465	GSTT1_MUSDORecName: Full=Glutathione S-transferase 1; AltName: Full=GST class-theta	0.39371	0.46728	-0.086446	0.9938	0.19702	0.93493	0.32805	0.514	0.27185	0.62524	-0.13043	0.82743	-0.047774	0.99997	-0.055816	0.97229	0.86602	0.0046539	0.8376	0.021909	0.33895	0.60435	0.46772	0.24342
contig10466	GPI8_HUMANRecName: Full=GPI-anchor transamidase; Short=GPI transamidase; AltName: Full=GPI8 homolog; Short=hGPI8; AltName: Full=Phosphatidylinositol-glycan biosynthesis class K protein; Short=PIG-K; Flags: Precursor	-0.16866	0.96497	0.12428	0.99556	-0.60209	0.95692	-0.044907	0.99061	-0.39585	0.85929	1.2557	0.36144	-0.096922	0.99997	0.04996	0.99286	1.9199	0.043149	-0.741	0.57905	0.020164	0.99444	-0.042695	0.98392
contig10473	---NA---	1.1243	0.46891	0.7833	0.91621	-0.90482	0.93429	-0.85273	0.69377	0.19374	0.94167	0.61912	0.67722	2.0344	0.76109	1.5375	0.58459	1.7149	0.044841	-0.12859	0.94452	0.28181	0.95261	1.053	0.49862
contig10474	ERD2_DROMERecName: Full=ER lumen protein-retaining receptor	1.1604	0.10782	0.42649	0.94925	0.1769	0.96995	0.66525	0.37695	0.52977	0.526	0.37281	0.66117	-0.10695	0.99997	0.35558	0.78566	1.1013	0.021635	0.69719	0.28028	0.32768	0.80009	0.86681	0.1806
contig10476	MTNB_CHICKRecName: Full=Methylthioribulose-1-phosphate dehydratase; Short=MTRu-1-P dehydratase; AltName: Full=APAF1-interacting protein homolog	0.17947	0.90746	-0.76337	0.69997	0.084	0.99086	0.25957	0.81149	0.05137	0.97457	-0.364	0.67469	-0.17625	0.99997	0.36075	0.78512	1.149	0.018297	0.77978	0.21773	0.12234	0.94415	0.99094	0.12538
contig10484	NDKA_DROMERecName: Full=Nucleoside diphosphate kinase; Short=NDK; Short=NDP kinase; AltName: Full=Abnormal wing disks protein; AltName: Full=Killer of prune protein	0.62724	0.43591	0.13359	0.9938	0.29258	0.93599	1.0682	0.071545	0.62708	0.37929	0.34206	0.66809	-0.052057	0.99997	0.20846	0.89718	1.3984	0.0030919	0.91274	0.1001	0.74214	0.40166	1.0939	0.065614
contig10496	CHM2A_XENTRRecName: Full=Charged multivesicular body protein 2a; AltName: Full=Chromatin-modifying protein 2a; Short=CHMP2a	0.22034	0.89606	-0.61853	0.88395	-0.28223	0.95307	0.0089437	0.99518	0.26677	0.84718	0.007632	0.99414	-0.35085	0.99997	-0.2012	0.92687	1.5143	0.0065844	0.56841	0.47809	-0.38144	0.79239	0.60313	0.43809
contig10502	---NA---	0.6531	0.23764	0.55335	0.68104	0.4475	0.75189	0.91004	0.039835	1.1193	0.022715	0.55876	0.30763	0.070944	0.99997	0.21869	0.83136	0.97191	0.006016	0.5531	0.21509	0.62331	0.3565	0.61624	0.18376
contig10507	MDM1_RATRecName: Full=Nuclear protein MDM1	1.079	0.11518	0.66529	0.7499	-0.18357	0.96659	-0.2569	0.79618	1.0914	0.11087	-0.089515	0.93264	0.018058	0.99997	0.069619	0.98042	1.0737	0.018452	0.72459	0.22149	0.68495	0.46107	0.55467	0.38905
contig10522	NRBF2_PONABRecName: Full=Nuclear receptor-binding factor 2; Short=NRBF-2	0.33695	0.56089	-0.21855	0.97016	-0.056902	0.98919	0.23301	0.68148	0.57255	0.19243	0.042196	0.95209	0.003268	0.99997	-0.065998	0.9652	0.98631	0.0019057	0.66588	0.066526	0.50243	0.38795	0.96476	0.014398
contig10523	RMND1_MOUSERecName: Full=Required for meiotic nuclear division protein 1 homolog; Flags: Precursor	0.48181	0.36072	-0.0069199	0.99864	0.0097879	0.99857	0.25534	0.66375	0.20147	0.77065	-0.0597	0.934	-0.19929	0.99997	-0.14555	0.89524	0.90067	0.0050353	0.55997	0.15255	0.34402	0.62374	0.60492	0.14505
contig10535	NEC1_RATRecName: Full=Neuroendocrine convertase 1; Short=NEC 1; AltName: Full=Prohormone convertase 1; AltName: Full=Proprotein convertase 1; Short=PC1; Flags: Precursor	0.10407	0.96687	-1.3725	0.49772	-0.63769	0.93429	-0.52589	0.79505	-0.82279	0.48492	-0.97619	0.38441	-0.68188	0.99997	-0.34421	0.90015	2.6111	0.006023	-0.0017635	0.99886	-0.071317	0.9801	0.49965	0.64752
contig10545	---NA---	1.1307	0.21888	0.20422	0.9938	0.64665	0.82148	0.27926	0.83395	1.1655	0.17661	0.34202	0.74798	0.20314	0.99997	0.26439	0.8991	1.7752	0.0032845	1.6501	0.020841	1.0668	0.33936	1.5523	0.041997
contig10565	---NA---	-0.57147	0.61136	-0.80015	0.75305	-0.88606	0.58721	-1.3104	0.073449	-1.0937	0.18527	-0.36995	0.71097	-1.3097	0.4732	-1.0418	0.54323	1.1265	0.038947	-0.22719	0.82642	-0.86683	0.4927	-0.23359	0.83336
contig10567	PAK2_RABITRecName: Full=Serine/threonine-protein kinase PAK 2; AltName: Full=Gamma-PAK; AltName: Full=p21-activated kinase 2; Short=PAK-2; AltName: Full=p21-activated protein kinase I; Short=PAKI; Contains: RecName: Full=PAK-2p27; Contains: RecName: Full=PAK-2p34	-0.025283	0.99282	-0.45427	0.97711	0.24692	0.97647	0.73716	0.56661	0.1931	0.92109	0.46462	0.72786	-0.17355	0.99997	-0.36542	0.89967	1.6742	0.036186	1.3503	0.14422	0.13914	0.95978	-0.15601	0.91467
contig10570	TLE3B_DANRERecName: Full=Transducin-like enhancer protein 3-B; AltName: Full=Protein groucho-1	-0.17655	0.95546	-0.045578	0.99792	-1.5598	0.75189	0.13253	0.95878	5.0599	0.0044315	1.0437	0.44791	1.5322	0.99997	0.43339	0.93395	0.65985	0.57603	0.45459	0.7588	1.1252	0.69844	1.4149	0.40351
contig10578	NELFE_BOVINRecName: Full=Negative elongation factor E; Short=NELF-E; AltName: Full=RNA-binding protein RD	0.12333	0.88985	-0.02758	0.99719	0.37604	0.75601	0.72439	0.056528	0.71478	0.099642	0.16143	0.77117	0.032489	0.99997	-0.080412	0.95204	0.7041	0.015774	0.61097	0.088831	0.5026	0.37999	0.712	0.064631
contig10585	SPT17_HUMANRecName: Full=Spermatogenesis-associated protein 17	0.25253	0.90014	-0.57623	0.94625	-0.68108	0.90151	0.055274	0.98089	-0.16285	0.93474	0.77529	0.61923	-0.019697	0.99997	0.17953	0.97021	1.8741	0.01207	-0.02076	0.99034	-0.3637	0.90662	0.29795	0.86013
contig10586	JAGN_CAEELRecName: Full=Protein jagunal homolog	0.65816	0.46382	0.36307	0.97007	0.39075	0.93429	0.95469	0.23143	-0.19293	0.88563	-0.12682	0.90819	0.12827	0.99997	0.15478	0.95729	1.6508	0.0020259	1.3798	0.024103	-0.12449	0.95114	0.69107	0.37049
contig10587	GRN_HUMANRecName: Full=Progranulin; Short=PGRN; AltName: Full=Acrogranin; AltName: Full=Epithelin precursor; AltName: Full=Glycoprotein of 88 Kda; Short=GP88; Short=Glycoprotein 88; AltName: Full=Granulin precursor; AltName: Full=PC cell-derived growth factor; Short=PCDGF; AltName: Full=Proepithelin; Short=PEPI; Contains: RecName: Full=Paragranulin; Contains: RecName: Full=Granulin-1; AltName: Fu…	0.38977	0.61248	-0.26828	0.97391	0.4938	0.74704	1.0545	0.028712	0.91881	0.10223	0.0016303	0.99862	-0.13343	0.99997	0.095828	0.95778	1.2904	0.0015865	0.92386	0.045734	0.62238	0.40152	1.1176	0.025513
contig10591	---NA---	0.54701	0.38401	0.085245	0.99454	0.36105	0.87227	0.49876	0.38337	1.116	0.034589	0.62573	0.28318	-0.13378	0.99997	-0.35651	0.6758	1.0252	0.0061676	0.51265	0.29686	0.27951	0.7642	0.56389	0.25656
contig10596	---NA---	0.78888	0.060993	0.026029	0.99719	0.049968	0.99086	-0.16	0.79783	0.62225	0.14688	-0.016315	0.98198	-0.071412	0.99997	0.36051	0.54323	0.88972	0.0030865	0.23158	0.60946	0.26271	0.70694	0.51936	0.17589
contig10598	---NA---	1.0512	0.040639	0.81978	0.25705	0.19449	0.94794	0.61386	0.22106	0.42212	0.46723	-0.36604	0.5256	0.33046	0.99997	1.0856	0.028241	0.67763	0.047722	0.73692	0.08635	0.42198	0.57663	0.8026	0.080485
contig10601	NF70_DORPERecName: Full=70 kDa neurofilament protein; Short=NF70	0.48094	0.44871	-0.25668	0.97048	-0.070244	0.98885	0.45355	0.42321	0.1936	0.8193	-0.8001	0.1438	0.29418	0.99997	0.79204	0.18102	0.80316	0.021529	0.7968	0.064663	0.20926	0.82846	0.84152	0.069241
contig10604	ZN271_PONABRecName: Full=Zinc finger protein 271	0.43111	0.54571	-0.12391	0.9938	0.21549	0.94606	0.52821	0.35167	0.57104	0.32029	0.075141	0.92891	-0.11445	0.99997	-0.24283	0.8212	0.88261	0.01662	0.52183	0.29247	0.2756	0.77233	0.49362	0.33443
contig10614	GCNT3_SHEEPRecName: Full=Beta-1,3-galactosyl-O-glycosyl-glycoprotein beta-1,6-N-acetylglucosaminyltransferase 3; AltName: Full=C2GnT-mucin type; Short=C2GnT-M	0.38436	0.49541	0.63286	0.39814	0.28795	0.87913	0.50513	0.24904	0.35321	0.48749	0.052252	0.94091	0.09298	0.99997	0.077241	0.95756	0.82434	0.0073303	0.42279	0.29859	-0.062352	0.95575	0.25607	0.5745
contig10618	KLH35_MOUSERecName: Full=Kelch-like protein 35	0.19537	0.80113	-0.34021	0.88042	0.039721	0.99312	0.35649	0.46513	0.31151	0.55009	-0.52907	0.26511	-0.26155	0.99997	0.021986	0.99162	0.76202	0.010567	0.83174	0.022706	0.50099	0.39006	0.90783	0.021001
contig10621	ETFA_HUMANRecName: Full=Electron transfer flavoprotein subunit alpha, mitochondrial; Short=Alpha-ETF; Flags: Precursor	0.6404	0.70493	0.1741	0.99454	0.22183	0.9819	1.309	0.29662	-0.080889	0.97414	0.44377	0.75024	0.21896	0.99997	1.0659	0.54243	2.1412	0.0059872	1.7422	0.060284	0.64713	0.76282	1.4177	0.21037
contig10630	PRS6A_HUMANRecName: Full=26S proteasome regulatory subunit 6A; AltName: Full=26S proteasome AAA-ATPase subunit RPT5; AltName: Full=Proteasome 26S subunit ATPase 3; AltName: Full=Proteasome subunit P50; AltName: Full=Tat-binding protein 1; Short=TBP-1	-0.065312	0.97396	-0.38351	0.96397	-0.11931	0.98444	0.17429	0.88909	0.13255	0.93203	-0.51988	0.53118	-0.27765	0.99997	-0.16656	0.93577	1.2577	0.012448	0.55927	0.43772	0.26994	0.85159	0.76764	0.26215
contig10631	AP1M1_HUMANRecName: Full=AP-1 complex subunit mu-1; AltName: Full=AP-mu chain family member mu1A; AltName: Full=Adaptor protein complex AP-1 subunit mu-1; AltName: Full=Adaptor-related protein complex 1 subunit mu-1; AltName: Full=Clathrin assembly protein complex 1 mu-1 medium chain 1; AltName: Full=Clathrin coat assembly protein AP47; AltName: Full=Clathrin coat-associated protein AP47; AltName…	0.69989	0.12304	0.35488	0.87324	-0.068787	0.98525	-0.11395	0.87627	0.56945	0.20431	-0.1125	0.85715	-0.08099	0.99997	0.024508	0.9906	1.0041	0.0018806	0.33738	0.43474	-0.35581	0.58886	0.23277	0.61739
contig10643	---NA---	0.92737	0.20865	0.53475	0.87787	0.78865	0.79063	1.0572	0.27318	0.28757	0.78195	0.6947	0.34877	-0.5568	0.99997	-0.066361	0.98677	2.0002	0.00076089	1.1237	0.050143	0.1428	0.93716	0.57277	0.4377
contig10646	RL7_CAEELRecName: Full=60S ribosomal protein L7	0.36306	0.52779	-0.13485	0.99367	0.10036	0.97356	0.59797	0.14939	0.13265	0.86807	-0.52037	0.28005	-0.026353	0.99997	0.32361	0.63241	0.68367	0.022255	0.68126	0.064891	0.5105	0.38836	1.0023	0.012833
contig10649	---NA---	0.51066	0.44838	0.0093963	0.99864	0.50958	0.71834	1.0414	0.028828	-0.12374	0.90971	0.020814	0.98233	0.032767	0.99997	0.3724	0.66636	0.86767	0.019513	0.40673	0.45155	-0.21383	0.8372	0.35042	0.52535
contig10657	DYLT1_RATRecName: Full=Dynein light chain Tctex-type 1; AltName: Full=Activator of G-protein signaling 2; Short=AGS2; AltName: Full=T-complex testis-specific protein 1 homolog	0.664	0.45193	0.4823	0.92823	-0.11289	0.98504	0.37235	0.69205	1.0295	0.1585	0.27055	0.7703	0.2571	0.99997	0.33532	0.80894	0.98221	0.040549	0.28268	0.73805	-0.13565	0.9368	0.038924	0.97087
contig10658	PDIA6_CAEELRecName: Full=Protein disulfide-isomerase A6 homolog; Flags: Precursor	0.60091	0.65059	0.20569	0.9938	-0.054354	0.99544	-0.00055958	0.99976	0.18504	0.92049	0.13627	0.92343	-0.15451	0.99997	-0.024983	0.99584	1.4768	0.017604	0.23262	0.8464	-0.30423	0.86679	0.45939	0.63844
contig10661	---NA---	0.3558	0.43994	0.28572	0.89035	0.33369	0.75189	0.62936	0.060526	0.50406	0.18907	-0.062658	0.91392	0.40023	0.8749	0.62255	0.13233	0.95091	0.00084382	0.7408	0.020033	0.45552	0.36857	0.54708	0.10642
contig10662	---NA---	1.0511	0.021184	0.60513	0.51732	0.54509	0.53485	0.50756	0.28131	0.28504	0.63925	-0.67066	0.18651	0.23175	0.99997	1.0677	0.015278	0.61998	0.047892	0.71945	0.066145	0.44426	0.49835	0.80816	0.056374
contig10665	---NA---	0.35978	0.85962	-0.49744	0.98162	0.36556	0.95342	0.58314	0.66452	0.075812	0.97442	0.69072	0.56236	-1.1469	0.94732	-1.1545	0.51775	1.7474	0.028021	0.52956	0.64707	-0.55655	0.8159	-0.8705	0.44548
contig10666	NATD1_HUMANRecName: Full=Protein NATD1; AltName: Full=N-acetyltransferase domain-containing protein 1	0.48058	0.322	0.31221	0.90713	0.83584	0.071653	1.12	0.0020397	0.79403	0.063786	0.29862	0.53763	0.053535	0.99997	0.15075	0.87797	1.1906	0.00036325	0.75237	0.034648	0.45532	0.4352	0.71862	0.061811
contig10669	TSTD3_MOUSERecName: Full=Thiosulfate sulfurtransferase/rhodanese-like domain-containing protein 3; AltName: Full=Rhodanese domain-containing protein 3	0.088668	0.95585	-0.48229	0.88498	-0.050102	0.99499	0.47644	0.51101	-0.85731	0.17846	-1.2569	0.053698	-0.19226	0.99997	0.036517	0.99001	0.87984	0.036627	0.69703	0.20541	0.42893	0.66707	0.89193	0.1146
contig10673	F261_RATRecName: Full=6-phosphofructo-2-kinase/fructose-2,6-bisphosphatase 1; Short=6PF-2-K/Fru-2,6-P2ase 1; Short=PFK/FBPase 1; AltName: Full=6PF-2-K/Fru-2,6-P2ase liver isozyme; Includes: RecName: Full=6-phosphofructo-2-kinase; Includes: RecName: Full=Fructose-2,6-bisphosphatase	0.033448	0.98732	0.033104	0.99792	0.7742	0.58164	1.1432	0.071321	0.36209	0.71366	0.22632	0.81242	0.47363	0.99997	0.4248	0.71906	1.0104	0.033258	0.58263	0.38916	0.57559	0.5821	0.92347	0.15018
contig10677	---NA---	0.85628	0.074361	0.40213	0.85328	0.6596	0.37109	1.2063	0.0029043	0.75544	0.11872	0.22237	0.70352	0.20592	0.99997	0.31509	0.68162	1.1356	0.0013543	1.022	0.0117	0.58665	0.35739	0.99743	0.021001
contig10681	S35A3_CANFARecName: Full=UDP-N-acetylglucosamine transporter; AltName: Full=Golgi UDP-GlcNAc transporter; AltName: Full=Solute carrier family 35 member A3	1.1651	0.16152	0.3598	0.97898	0.10227	0.98919	0.44563	0.66237	-0.10525	0.95302	0.30589	0.76393	0.57107	0.99997	0.76458	0.47513	1.1319	0.033975	0.77955	0.28236	0.81835	0.45578	1.1625	0.10277
contig10687	YIPF5_XENLARecName: Full=Protein YIPF5; AltName: Full=YIP1 family member 5	0.16001	0.91406	-0.15647	0.9938	-0.59295	0.75189	-0.46832	0.55745	-0.50737	0.51962	-0.27435	0.74491	0.42557	0.99997	0.42023	0.70489	0.90208	0.044805	0.58942	0.35021	0.93268	0.2871	0.77506	0.2069
contig10693	---NA---	0.31552	0.73451	-0.28429	0.9727	0.40611	0.85683	0.57504	0.34676	0.49133	0.45707	0.10286	0.90819	-0.33437	0.99997	-0.56463	0.47194	0.82653	0.035291	0.37857	0.52878	0.080623	0.95691	0.36948	0.53166
contig10700	TRM61_HUMANRecName: Full=tRNA (adenine(58)-N(1))-methyltransferase catalytic subunit TRMT61A; AltName: Full=mRNA methyladenosine-N(1)-methyltransferase catalytic subunit TRMT61A; AltName: Full=tRNA(m1A58)-methyltransferase subunit TRMT61A; Short=tRNA(m1A58)MTase subunit TRMT61A	0.35861	0.56198	-0.1614	0.98942	0.33534	0.8441	0.53453	0.24203	0.52066	0.28103	0.14891	0.81185	-0.11617	0.99997	-0.30032	0.6887	0.69694	0.025758	0.46465	0.2683	0.16866	0.85282	0.25718	0.59553
contig10720	ACBP_CHAVIRecName: Full=Acyl-CoA-binding protein; Short=ACBP; AltName: Full=EP	0.68911	0.69526	0.86203	0.89732	-0.36833	0.96522	0.023131	0.99288	0.64377	0.67891	0.44072	0.76743	0.11015	0.99997	0.34257	0.90524	2.1332	0.0079376	0.68541	0.57432	0.69273	0.72291	1.161	0.28149
contig10733	---NA---	-1.1189	0.54924	-0.042301	0.99792	-3.5596	0.044724	-3.4877	0.026792	0.68379	0.73513	0.64914	0.67583	-0.78349	0.99997	-1.7518	0.41526	0.48732	0.65715	-0.62954	0.61132	-1.16	0.67679	-2.0219	0.18217
contig10735	ADT3_YEASTRecName: Full=ADP,ATP carrier protein 3; AltName: Full=ADP/ATP translocase 3; AltName: Full=Adenine nucleotide translocator 3; Short=ANT 3	0.85309	0.35249	0.57675	0.91003	1.106	0.36999	1.7599	0.0099155	0.51649	0.60655	0.030474	0.98229	0.32411	0.99997	0.70857	0.52425	1.08	0.042837	0.87071	0.21509	0.49871	0.70646	1.3511	0.059906
contig10738	PGSC2_DROMERecName: Full=Peptidoglycan-recognition protein SC2; Flags: Precursor	0.42983	0.73344	-0.8991	0.65343	-0.29521	0.94881	0.099842	0.94447	-0.54729	0.56979	-0.15679	0.89512	-0.23853	0.99997	0.39309	0.78974	1.057	0.046112	0.62733	0.41273	-0.0883	0.96539	0.71959	0.33666
contig10742	CAMT2_DICDIRecName: Full=Probable caffeoyl-CoA O-methyltransferase 2; AltName: Full=O-methyltransferase 6	1.9592	0.00095393	2.0623	0.0003417	0.72439	0.58357	0.95565	0.11881	1.2199	0.065394	0.32237	0.68678	1.247	0.16023	1.7276	0.0033867	1.9384	0.00021486	2.4496	9.1871e-06	1.6998	0.010881	1.7302	0.004056
contig10744	L2EFL_DROMERecName: Full=Protein lethal(2)essential for life; AltName: Full=Protein Efl21	-0.057469	0.97134	-0.58513	0.71809	-0.07978	0.98736	0.25591	0.74308	-0.30874	0.685	-0.24638	0.72496	-0.23231	0.99997	-0.44904	0.58665	0.74542	0.047722	0.073257	0.92978	-0.24587	0.8143	0.54024	0.30645
contig10745	---NA---	0.93847	0.47696	0.15119	0.99454	0.10852	0.99303	0.69924	0.63096	0.085991	0.97101	0.21363	0.90351	0.3022	0.99997	-0.097359	0.98901	2.8431	0.011165	0.72761	0.68045	0.57446	0.80748	0.1485	0.9276
contig10754	GNL3_CAEELRecName: Full=Guanine nucleotide-binding protein-like 3 homolog; AltName: Full=Nucleostemin-1	-0.15791	0.92515	-0.24068	0.99305	-0.19187	0.96995	-0.52276	0.55194	-0.2419	0.85123	-0.18503	0.86051	-0.17717	0.99997	-0.12261	0.96026	1.15	0.021717	-0.10095	0.92492	-0.15125	0.92982	-0.00014471	0.99987
contig10759	ACON_CAEELRecName: Full=Probable aconitate hydratase, mitochondrial; Short=Aconitase; AltName: Full=Citrate hydro-lyase; Flags: Precursor	0.81214	0.13296	0.29752	0.9585	0.58825	0.56165	0.81821	0.083761	0.8106	0.12785	0.040861	0.96155	0.042729	0.99997	0.68318	0.2889	1.4837	0.00030011	1.0101	0.021714	0.17202	0.86915	0.6685	0.15984
contig10761	4CLL5_ORYSJRecName: Full=4-coumarate--CoA ligase-like 5	0.461	0.79906	-0.15528	0.99454	-0.042006	0.99686	0.15058	0.93565	0.17118	0.93765	-1.0424	0.34807	0.12589	0.99997	0.9727	0.48181	1.5702	0.022835	0.9938	0.28494	0.53268	0.76391	1.5111	0.098393
contig10767	---NA---	0.20774	0.73344	-0.098101	0.9938	0.36443	0.70069	0.66551	0.048918	0.72891	0.056415	-0.0039417	0.99411	-0.11422	0.99997	-0.20072	0.76988	0.41088	0.10452	0.54685	0.088619	0.26198	0.66707	0.52947	0.12539
contig10773	BTF3_MOUSERecName: Full=Transcription factor BTF3; AltName: Full=Nascent polypeptide-associated complex subunit beta; Short=NAC-beta; AltName: Full=RNA polymerase B transcription factor 3	0.80215	0.1636	0.13571	0.9938	-0.062508	0.99089	0.17752	0.83751	0.40463	0.53551	-0.38219	0.53889	0.14462	0.99997	0.39425	0.64104	0.82714	0.025621	0.72259	0.11864	0.48268	0.53809	0.92491	0.061375
contig10789	SDS3_BOVINRecName: Full=Sin3 histone deacetylase corepressor complex component SDS3; AltName: Full=Suppressor of defective silencing 3 protein homolog	0.094568	0.94015	-0.36128	0.926	0.13671	0.96966	0.088012	0.92501	0.28434	0.69105	0.080666	0.92048	-0.32167	0.99997	-0.61644	0.35672	0.72631	0.039393	0.27436	0.63459	0.27381	0.76471	0.39838	0.43603
contig10790	---NA---	0.37174	0.55069	-0.020051	0.99792	0.29598	0.88882	0.64677	0.14336	0.63352	0.18493	0.1198	0.85747	0.079386	0.99997	-0.063041	0.97049	0.72488	0.022829	0.4479	0.29994	0.48384	0.45672	0.64091	0.13134
contig10792	KS6A3_MOUSERecName: Full=Ribosomal protein S6 kinase alpha-3; Short=S6K-alpha-3; AltName: Full=90 kDa ribosomal protein S6 kinase 3; Short=p90-RSK 3; Short=p90RSK3; AltName: Full=MAP kinase-activated protein kinase 1b; Short=MAPK-activated protein kinase 1b; Short=MAPKAP kinase 1b; Short=MAPKAPK-1b; AltName: Full=Ribosomal S6 kinase 2; Short=RSK-2; AltName: Full=pp90RSK2	0.65404	0.45876	-0.14349	0.9938	-0.10994	0.98526	-0.0025857	0.99864	-0.22718	0.85611	-0.12078	0.91254	-0.65479	0.9799	0.35464	0.78936	1.3083	0.0080658	0.41625	0.582	-0.47591	0.68208	0.27769	0.72949
contig10797	G3P_CRYNJRecName: Full=Glyceraldehyde-3-phosphate dehydrogenase; Short=GAPDH	0.81244	0.28238	0.0061272	0.99941	0.63629	0.7162	0.93525	0.14345	0.32889	0.73846	0.12711	0.90165	0.066586	0.99997	0.7245	0.41603	1.402	0.0037166	0.97114	0.089148	0.66536	0.48289	1.1721	0.057117
contig10802	DDAH1_HUMANRecName: Full=N(G),N(G)-dimethylarginine dimethylaminohydrolase 1; Short=DDAH-1; Short=Dimethylarginine dimethylaminohydrolase 1; AltName: Full=DDAHI; AltName: Full=Dimethylargininase-1	0.84926	0.16152	0.12225	0.9938	-0.080496	0.98846	0.62569	0.28305	0.55436	0.37508	0.35406	0.59536	-0.08499	0.99997	-0.26774	0.81231	1.4851	0.00075001	0.66119	0.18979	-0.036323	0.98074	0.51997	0.34395
contig10808	NDUAA_DROMERecName: Full=NADH dehydrogenase	0.65647	0.39559	0.18297	0.9938	0.79876	0.48767	1.4823	0.008088	0.39322	0.64548	-0.45729	0.53718	0.2663	0.99997	0.93067	0.23565	1.151	0.010407	1.1933	0.02922	1.0397	0.20746	1.438	0.015332
contig10815	ESTD_PIGRecName: Full=S-formylglutathione hydrolase; Short=FGH; AltName: Full=Esterase D	0.57061	0.57419	-0.0067202	0.99941	-0.095669	0.9897	0.19204	0.87852	0.53857	0.55209	0.32217	0.73172	-0.0045427	0.99997	0.23313	0.90015	1.1908	0.019905	0.66669	0.34573	0.36721	0.78637	1.0663	0.11678
contig10820	ABLM2_MOUSERecName: Full=Actin-binding LIM protein 2; Short=abLIM-2; AltName: Full=Actin-binding LIM protein family member 2	1.0241	0.018436	0.60702	0.46188	0.031776	0.99544	0.62196	0.13943	0.4927	0.2953	-0.31774	0.53115	0.24061	0.99997	0.73727	0.13616	0.89477	0.0046809	0.87373	0.021234	0.59407	0.30915	0.89987	0.026397
contig10822	ADRO_HUMANRecName: Full=NADPH:adrenodoxin oxidoreductase, mitochondrial; Short=AR; Short=Adrenodoxin reductase; AltName: Full=Ferredoxin--NADP(+) reductase; Short=Ferredoxin reductase; Flags: Precursor	1.3679	0.077511	1.4803	0.15309	1.2746	0.45419	0.34009	0.80545	1.0254	0.3322	1.6254	0.06393	0.35602	0.99997	-0.098097	0.97439	2.445	0.001255	0.90564	0.1565	-0.54962	0.66592	0.11849	0.90182
contig10829	MA2B1_MACFARecName: Full=Lysosomal alpha-mannosidase; Short=Laman; AltName: Full=Lysosomal acid alpha-mannosidase; AltName: Full=Mannosidase alpha class 2B member 1; AltName: Full=Mannosidase alpha-B; Flags: Precursor	0.40168	0.81072	-0.33051	0.98874	-0.44531	0.93429	-0.81334	0.42813	-0.30405	0.85184	0.75275	0.46459	-0.50558	0.99997	-0.53917	0.73295	1.5193	0.01662	1.1387	0.15402	-0.31916	0.86148	-0.022818	0.98753
contig10831	---NA---	0.36202	0.60716	0.078223	0.99454	0.53437	0.6327	0.89454	0.046192	0.53628	0.32148	0.061109	0.94027	0.22393	0.99997	0.32632	0.69443	0.94032	0.0077659	0.74249	0.082418	0.6558	0.32732	0.9987	0.029905
contig10833	UD19_MOUSERecName: Full=UDP-glucuronosyltransferase 1-9; Short=UDPGT 1-9; Short=UGT1*9; Short=UGT1-09; Short=UGT1.9; AltName: Full=UDP-glucuronosyltransferase 1-7; Short=UDPGT; AltName: Full=UDP-glucuronosyltransferase 1A9; AltName: Full=UGT1A12; AltName: Full=UGTP4; Flags: Precursor	0.8964	0.36723	1.0886	0.53503	0.59169	0.89224	1.0028	0.3036	0.67772	0.491	1.2889	0.16291	0.8102	0.99997	1.1819	0.25469	2.879	0.00049084	1.7059	0.033568	1.0368	0.36831	1.2697	0.099812
contig10853	---NA---	0.54601	0.1744	0.23106	0.94757	0.49712	0.4249	0.4805	0.19027	0.62371	0.1084	0.25103	0.5631	0.046209	0.99997	-0.01221	0.99459	0.51624	0.04302	0.30426	0.40839	0.45217	0.37742	0.67169	0.050617
contig10854	IFT52_MOUSERecName: Full=Intraflagellar transport protein 52 homolog; AltName: Full=Protein NGD5	0.92285	0.48549	0.36318	0.99367	-1.2658	0.68292	-0.52966	0.82852	0.014202	0.99715	0.33395	0.83701	-0.43962	0.99997	-0.03006	0.99648	1.6787	0.035473	0.59902	0.58945	-0.45848	0.83548	0.11627	0.94274
contig10859	RL26_LITLIRecName: Full=60S ribosomal protein L26	0.34109	0.58875	-0.047674	0.99519	0.16308	0.95308	0.66271	0.12243	0.22636	0.73404	-0.41208	0.41675	-0.016735	0.99997	0.35654	0.60355	0.5567	0.070528	0.89376	0.021714	0.69241	0.24182	1.2111	0.004056
contig10869	DHDH_DANRERecName: Full=Trans-1,2-dihydrobenzene-1,2-diol dehydrogenase; AltName: Full=D-xylose 1-dehydrogenase; AltName: Full=D-xylose-NADP dehydrogenase; AltName: Full=Dimeric dihydrodiol dehydrogenase	1.0592	0.37918	0.33571	0.9938	-1.1349	0.68123	-0.66079	0.64903	0.65531	0.66812	-0.63813	0.72264	-0.23218	0.99997	0.52883	0.81231	1.9838	0.012692	0.73602	0.47198	0.41808	0.85231	0.0083489	0.99606
contig10871	---NA---	0.865	0.59204	-0.4976	0.98162	0.19878	0.98325	-0.027985	0.99132	0.98774	0.46046	1.1827	0.35866	-0.62048	0.99997	-1.1827	0.45121	2.1154	0.0093651	0.27435	0.8624	-0.10058	0.97169	0.38003	0.78477
contig10874	TRAF2_MOUSERecName: Full=TNF receptor-associated factor 2; AltName: Full=E3 ubiquitin-protein ligase TRAF2; AltName: Full=RING-type E3 ubiquitin transferase TRAF2	-0.14954	0.91132	-1.0442	0.19258	0.13017	0.97614	0.22851	0.80523	0.43305	0.55921	0.019542	0.98484	-0.94268	0.39535	-0.40322	0.68472	1.1193	0.0083939	0.4026	0.5228	-0.2218	0.85377	0.45726	0.4445
[truncated: 6,454 more rows]

## Sheet: Table S2
Table S2: List of significantly enriched (p < 0.05 Fisher's Exact Test, Blast2GO) GO Biological processes associated to the DEGs affected by each treatment. #Test: number of sequences in the test set relative to the corresponding GO term; #Ref: number of sequences in the reference set relative to the corresponding GO term.
[truncated: 46 more rows]

[truncated: 1 more sheets: Table S3]
